# Supplementary material for: The Shu complex prevents mutagenesis and cytotoxicity of single-strand specific alkylation lesions
Source: eLife. 2021 Nov 1;10:e68080. doi: 10.7554/eLife.68080 (PMC8610418; doi:10.7554/eLife.68080)
Supplement: Figure 2—figure supplement 1—source data 1. [file elife-68080-fig2-figsupp1-data1.xlsx]

## Sheet: Figure 2-figure supplement 1 So
WT	csm2Δ	rad26Δ	csm2Δ rad26Δ	WT + MMS	csm2Δ + MMS	rad26Δ + MMS	csm2Δ rad26Δ + MMS
3.19385e-07	2.21785e-06	1.91138e-07	2.55297e-06	4.91574e-07	4.72152e-06	4.48171e-07	6.75222e-06
1.11611e-07	1.57465e-06	5.59135e-07	1.87422e-06	1.71421e-07	3.85471e-06	8.51102e-07	6.11755e-06
1.91666e-07	1.2739e-06	3.59217e-07	2.00712e-06	3.32628e-07	3.78449e-06	5.29158e-07	6.94449e-06
1.82677e-07	1.03127e-06	1.88069e-07	1.23736e-06	3.00583e-07	3.01711e-06	3.64995e-07	6.19536e-06
1.59016e-07	1.28721e-06	3.62203e-07	1.93618e-06	3.87372e-06	1.98204e-06	3.3519e-07	2.56813e-06
4.09344e-07	2.90336e-06	2.20855e-07	1.92891e-06	3.20488e-07	2.83673e-06	5.85521e-07	3.17547e-06
