# Supplementary material for: The Shu complex prevents mutagenesis and cytotoxicity of single-strand specific alkylation lesions
Source: eLife. 2021 Nov 1;10:e68080. doi: 10.7554/eLife.68080 (PMC8610418; doi:10.7554/eLife.68080)
Supplement: Figure 4—source data 1. [file elife-68080-fig4-data1.xlsx]

## Sheet: Figure 4 Source data 1
WT empty + MMS	WT ALKBH2 + MMS	WT alkbh2-CD + MMS	csm2Δempty	csm2ΔALKBH2	csm2Δalkbh2-CD	csm2Δempty + MMS	csm2ΔALKBH2 + MMS	csm2Δalkbh2-CD + MMS
8.45194e-07	5.92443e-07	5.3295e-07	7.75685e-07	8.67476e-07	1.29934e-06	4.67347e-06	2.06479e-06	6.5866e-06
8.37245e-07	4.58015e-07	4.17242e-07	3.53141e-07	9.59653e-07	1.66269e-06	1.88739e-06	2.99143e-06	7.22762e-06
1.23186e-06	1.9712e-07	2.63744e-07	3.48463e-07	1.13185e-06	2.26503e-06	1.19406e-06	3.852e-06	5.82398e-06
5.2396e-07	9.65403e-08	5.28456e-07	2.13478e-07	1.67422e-06	1.80508e-06	1.30923e-06	3.41295e-06	5.69297e-06
	7.5236e-07		7.54959e-07	1.34926e-06	9.35398e-07	4.90978e-06	1.99239e-06	3.95823e-06
	8.24109e-07		5.70608e-07	4.79644e-07	7.96225e-07	2.86026e-06	1.65387e-06	3.72991e-06
			1.05725e-06	6.20559e-07	1.44177e-06	2.85091e-06	1.96641e-06	2.90604e-06
			6.48243e-07	9.22376e-07	6.37126e-07	2.18128e-06	1.93743e-06	5.64892e-06
			1.15594e-06	1.19788e-06		1.16447e-06	1.49858e-06	4.32313e-06
			3.24019e-07	7.30194e-07		4.75426e-06	1.8287e-06	5.46753e-06
				4.5363e-07		3.94009e-06	1.02357e-06
				6.06223e-07		3.01701e-06	1.73442e-06
				9.20973e-07		2.51162e-06	2.98294e-06
				3.34087e-07		4.19379e-06	2.31496e-06
				5.75931e-07		1.00614e-05	1.65816e-06
				5.63861e-07		3.91042e-06	1.67554e-06
				7.01307e-07		4.63679e-06	2.08542e-06
				1.30011e-06		3.63993e-06	1.95187e-06
						4.77258e-06	2.00797e-06
						5.00285e-06	2.96618e-06
						5.56023e-06	2.87103e-06
							1.987e-06
							2.40082e-06
							3.30624e-06
							3.22501e-06
							3.1902e-06
							2.41183e-06
							4.10328e-06
							4.31238e-06
							4.06119e-06
