# Supplementary material for: The Shu complex prevents mutagenesis and cytotoxicity of single-strand specific alkylation lesions
Source: eLife. 2021 Nov 1;10:e68080. doi: 10.7554/eLife.68080 (PMC8610418; doi:10.7554/eLife.68080)
Supplement: Figure 5—source data 1. [file elife-68080-fig5-data1.xlsx]

## Sheet: Figure 5 Source data 1
rad51Δempty	rad51ΔALKBH2	rad51Δalkbh2-CD	rad51Δempty + MMS	rad51ΔALKBH2 + MMS	rad51Δalkbh2-CD + MMS
4.93769e-06	2.91537e-06	3.75256e-06	1.05518e-05	6.96791e-06	9.92033e-06
2.53359e-06	3.26807e-06	6.37998e-06	6.8929e-06	5.63007e-06	1.00562e-05
2.5029e-06	4.84541e-06	3.52217e-06	7.38908e-06	5.75814e-06	7.49571e-06
9.28479e-06	3.16541e-06	6.90744e-06	1.01003e-05	7.57473e-06	1.34239e-05
4.67524e-06	3.40465e-06	8.07658e-06	9.45083e-06	7.18936e-06	1.16211e-05
4.05931e-06	3.97031e-06	6.29078e-06	1.03785e-05	5.95694e-06	8.88569e-06
