# Supplementary material for: The Shu complex prevents mutagenesis and cytotoxicity of single-strand specific alkylation lesions
Source: eLife. 2021 Nov 1;10:e68080. doi: 10.7554/eLife.68080 (PMC8610418; doi:10.7554/eLife.68080)
Supplement: Figure 5—source data 2. [file elife-68080-fig5-data2.xlsx]

## Sheet: Figure 5 Source data 2
WT	csm2Δ	rad55-SA	csm2Δ rad55-SA	WT + MMS	csm2Δ + MMS	rad55-SA + MMS	csm2Δ rad55-SA + MMS
2.15578e-07	1.12434e-06	2.72696e-07	1.02647e-06	1.877e-07	1.75175e-06	2.13254e-07	1.84211e-06
1.15824e-06	1.84851e-06	8.87684e-07	7.70769e-07	3.12872e-06	2.57668e-06	1.2532e-06	2.95697e-06
2.99616e-07	1.47143e-06	3.40456e-07	9.3263e-07	3.46906e-07	3.01005e-06	6.78237e-07	3.97902e-06
1.90974e-07	1.84544e-06	1.57338e-07	1.02041e-06	4.87801e-07	2.91403e-06	6.62154e-07	5.171e-06
3.0534e-07	1.34589e-06	3.0234e-07	1.49389e-06	2.20851e-07	3.16874e-06	9.58738e-07	3.71932e-06
4.3794e-07	9.46721e-07	2.61747e-07	2.48906e-06	2.96647e-07	3.4176e-06	1.20214e-06	5.10817e-06
4.94911e-07	1.17346e-06	2.14259e-07		3.49888e-07	4.66292e-06	6.46787e-07
	1.26774e-06	3.42072e-07			5.09875e-06	7.92169e-07
