# Supplementary material for: The Shu complex prevents mutagenesis and cytotoxicity of single-strand specific alkylation lesions
Source: eLife journal article supplement (doi:10.7554/elife.68080), 2021-11-01
Supplement: supp [file NormalizedAnisotropy.xlsx]

## Sheet: Sheet1
Titrations with 5 nM WT Fork containing a T where lesions would be:																																					8/30 protein prep S200 Fraction A 12
WTT	5 nM in 100 uL			2021-08-19	8_19_2021for5nMWTTplusCsm2Psy3T2					8_20_2021for5nMWTTplusCsm2Psy3T1			2021-09-02	9_2_2021for5nMWTTplusCsm2Psy3T2					8_19_2021for5nMWTTplusCsm2Psy3T3
Titration 1				g factor	1.6255				g factor	1			g factor	1.3272				g factor	1900-01-01 14:17:05																		2021-09-03	9_3_2021for5nMWTTplusCsm2Psy3T2
g factor 1.4005				[Csm2Psy3] nM	Anisotropy	delta Anisotropy			[Csm2Psy3] nM	Anisotropy	delta Anisotropy		[Csm2Psy3] nM	Anisotropy	delta Anisotropy			[Csm2Psy3] nM	Anisotropy	delta Anisotropy																	g factor	1.1139
				0	0.0326	0			0	0.2093	0		0	0.2882	0			0	0.0435	0																	[Csm2Psy3] nM	Anisotropy	delta Anisotropy
[Csm2Psy3] nM	Anisotropy	delta Anisotropy		5	0.0393	0.0067			5	0.212	0.0027		5	0.2993	0.0111			5	0.0456	0.0021																	0	0.1667	0
0	0.1004	0		10	0.047	0.0144			10	0.2164	0.0071		10	0.3015	0.0133			10	0.0476	0.0041																	5	0.1664	-0.0003
5	0.1084	0.008		15	0.051	0.0184			15	0.2147	0.0054		15	0.315	0.0268			15	0.0484	0.0049																	10	0.1659	-0.0008
10	0.1262	0.0258		20	0.0536	0.021			20	0.2166	0.0073		20	0.3111	0.0229			20	0.0509	0.0074																	15	0.1663	-0.0004
15	0.132	0.0316		40	0.0774	0.0448			40	0.2272	0.0179		40	0.33	0.0418			40	0.0629	0.0194																	20	0.1661	-0.0006
20	0.1401	0.0397		59	0.0894	0.0568			59	0.2294	0.0201		59	0.3339	0.0457			59	0.0727	0.0292																	40	0.1688	0.0021
40	0.159	0.0586		79	0.0941	0.0615			79	0.2407	0.0314		79	0.3534	0.0652			79	0.0842	0.0407																	59	0.1695	0.0028
59	0.1762	0.0758		98	0.0992	0.0666			98	0.2423	0.033		98	0.3662	0.078			98	0.084	0.0405																	79		-0.1667
79	0.1841	0.0837		212	0.1455	0.1129			212	0.2866	0.0773		212	0.3969	0.1087			212	0.1313	0.0878																	98	0.1706	0.0039
98	0.1922	0.0918		319	0.1694	0.1368			319	0.3101	0.1008		319	0.4202	0.132			319	0.1516	0.1081																	212	0.1774	0.0107
212	0.2296	0.1292		420	0.1786	0.146			420	0.3645	0.1552		420	0.4242	0.136			420	0.1627	0.1192																	319	0.1852	0.0185
319	0.2257	0.1253		521	0.1904	0.1578							521	0.4153	0.1271			521	0.1696	0.1261																	420	0.189	0.0223
420	0.2348	0.1344											622	0.4333	0.1451																						521	0.1932	0.0265
521	0.2372	0.1368																																			622	0.1958	0.0291
																																					723	0.1989	0.0322
Titrations with 5 nM Fork containing a 3meC lesion:																																					824
2021-08-19	8_19_2021for5nM3MeCplusCsm2Psy3T1				2021-09-02	9_2_2021for5nM3MeCplusCsm2Psy3T1			2021-09-02	9_2_2021for5nM3MeCplusCsm2Psy3T2				2021-09-02	9_2_2021for5nM3MeCplusCsm2Psy3T3
g factor	1.4458				g factor	1.6291			g factor	1.6291				g factor	1.6312
[Csm2Psy3] nM	Anisotropy	delta Anisotropy			[Csm2Psy3] nM	Anisotropy	delta Anisotropy		[Csm2Psy3] nM	Anisotropy	delta Anisotropy			[Csm2Psy3] nM	Anisotropy	delta Anisotropy
0	0.0727	0			0	0.0328	0		0	0.0424	0			0	0.0354	0
5	0.0782	0.0055			5	0.0351	0.0023		5	0.0457	0.0033			5	0.0429	0.0075
10	0.0812	0.0085			10	0.0381	0.0053		10	0.0482	0.0058			10	0.0489	0.0135
15	0.0838	0.0111			15	0.0417	0.0089		15	0.0524	0.01			15	0.0519	0.0165
20	0.0833	0.0106			20	0.0448	0.012		20	0.0572	0.0148			20	0.0549	0.0195
40	0.0961	0.0234			40	0.0592	0.0264		40	0.0715	0.0291			40	0.0735	0.0381
59	0.1065	0.0338			59	0.0685	0.0357		59	0.0881	0.0457			59	0.087	0.0516
79	0.1145	0.0418			79	0.0754	0.0426		79	0.0974	0.055			79	0.0978	0.0624
98	0.1203	0.0476			98	0.0798	0.047		98	0.0983	0.0559			98	0.1	0.0646
212	0.1694	0.0967			212	0.1278	0.095		212	0.1439	0.1015			212	0.1494	0.114
319	0.1887	0.116			319	0.151	0.1182		319	0.1739	0.1315			319	0.1713	0.1359
420	0.2016	0.1289			420	0.1694	0.1366		420	0.1798	0.1374			420	0.187	0.1516
521	0.2106	0.1379			521	0.171	0.1382		521	0.1866	0.1442			521	0.2018	0.1664
					622	0.1776	0.1448		622	0.1933	0.1509
Titrations with 5 nM Fork containing a 1meA lesion:
2021-09-02	9_2_2021for5nM1MeAplusCsm2Psy3T1			2021-09-02	9_2_2021for5nM1MeAplusCsm2Psy3T2				2021-09-02	9_2_2021for5nM1MeAplusCsm2Psy3T3
g factor	1.6281			g factor	1.6403				g factor	1.6235
[Csm2Psy3] nM	Anisotropy	delta Anisotropy		[Csm2Psy3] nM	Anisotropy	delta Anisotropy			[Csm2Psy3] nM	Anisotropy	delta Anisotropy
0	0.0395	0		0	0.0367	0			0	0.0409	0
5	0.0412	0.0017		5	0.0359	-0.0008			5	0.0417	0.0008
10	0.0523	0.0128		10	0.0402	0.0035			10	0.0451	0.0042
15	0.0514	0.0119		15	0.0406	0.0039			15	0.0453	0.0044
20	0.0571	0.0176		20	0.043	0.0063			20	0.0515	0.0106
40	0.0604	0.0209		40	0.0605	0.0238			40	0.0664	0.0255
59	0.0736	0.0341		59	0.0674	0.0307			59	0.0838	0.0429
79	0.0781	0.0386		79	0.0826	0.0459			79	0.0896	0.0487
98	0.0881	0.0486		98	0.0808	0.0441			98	0.0995	0.0586
212	0.1456	0.1061		212	0.1409	0.1042			212	0.1601	0.1192
319	0.1705	0.131		319	0.1645	0.1278			319	0.1764	0.1355
420	0.187	0.1475		420	0.1796	0.1429			420	0.1935	0.1526
521	0.1908	0.1513		521	0.1893	0.1526			521	0.2014	0.1605
622	0.2105	0.171		622	0.1924	0.1557			622	0.2069	0.166
723	0.1945	0.155		723	0.1999	0.1632			723	0.2169	0.176
