# Supplementary material for: The Shu complex prevents mutagenesis and cytotoxicity of single-strand specific alkylation lesions
Source: eLife. 2021 Nov 1;10:e68080. doi: 10.7554/eLife.68080 (PMC8610418; doi:10.7554/eLife.68080)
Supplement: Supplementary file 1. [file elife-68080-supp1.xlsx]

## Sheet: 1a
Supplemental File 1a: List of Strains Used in This Study
Abbreviated genotype	ID	Genotype	Reference
WT	KBY 824-29A	Mat alpha ADE2 TRP1 LYS2 CAN1	Derivative of KBY 614-3D (Gaines et al. 2015)
csm2Δ	KBY 824-10C	Mat alpha ADE2 TRP1 LYS2 csm2::KanMX6 CAN1	Derivative of KBY 614-3D (Gaines et al. 2015)
rad52Δ	W3777-17A	MAT a ADE2 bar1::LEU2 trp1-1 LYS2 rad52::HIS5 RAD5	Rothstein lab
rad51Δ	KBY 218-2B	MAT alpha ADE2 trp1-1 lys2∆ rad51::natMX4	This study
rad55Δ	KBY 213-2A	MAT alpha ADE2 TRP1 lys2∆ rad55::NatMX	Godin et al. 2015
ubc13Δ	KBY 1154-6C	MAT alpha ADE2 TRP1 ubc13::HIS3	This study
shu1Δ	KBY 159-1C	MAT alpha ADE2 trp1-1 lys2-1 shu1::Hph4	Godin et al. 2015
shu2Δ	KBY 92-1A	MAT alpha ADE2 shu2::TRP1 LYS2 trp1-1 ura3-1 his3-11,15 RAD5	Godin et al. 2015
psy3Δ	KBY 108-1C	Mat a ADE2 bar1::LEU2 trp1-1 LYS2 RAD5 psy3::KanMX4	Godin et al. 2015
csm2Δ/csm2Δ	KBY 342	MAT a/alpha ADE2/ade2-1 csm2::KanMX/csm2::KanMX leu2∆EcoRI::URA3-HO::leu2∆BstEII/ura3-1 LYS2/LYS2 RAD5/RAD5	Godin et al. 2015
WT	KBY 138	MAT a/alpha ADE2/ade2-1 leu2-3,112/leu2-3,112 his3-11,15/his3-11,15 ura3-1/ura3-1 TRP1/trp1-1 LYS2/lys2∆ RAD5/RAD5	Godin et al. 2015
rad55-S2,8,14A	KBY 1088-3C	MAT a ADE2 trp1-1 LYS2 rad55-S2A,S8A,S14A::KanMX	This study
rad55-S2,8,14A csm2Δ	KBY 1280-1A	MAT alpha ADE2 TRP1 lys2∆ csm2::hphNT1 rad55-S2A,S8A,S14A::KanMX	This study
csm2-F46A	KBY 551	MAT alpha ADE2 leu2-3,112 his3-11,15 ura3-1 TRP1 lys2 RAD5 csm2-F46A	Gaines et al. 2015
WT/WT	KBY 1133-4	MAT a/alpha ADE2/ADE2 leu2-3,112/leu2-3 his3-11,15/his3=11,15 ura3-1/ura3-1 TRP1/TRP1 lys2/lys2 RAD5/RAD5	This study
csm2Δ/csm2Δ	KBY 1247	Mat a/alpha, ADE2/ADE2, leu2-3,112/leu2-3,112, trp1-1/TRP1, ura3-1/ura3-1, LYS2/lys2∆, RAD5/RAD5, csm2::KanMX/csm2::hphNT1	This study
csm2Δ rad26Δ	yNV01	Mat alpha ADE2 TRP1 LYS2 csm2::KanMX6 CAN1 rad26::LEU2	This study
rad26Δ	yNV02	Mat alpha ADE2 TRP1 LYS2 CAN1 rad26::LEU2	This study
mag1Δ csm2Δ	KBY 1044-37A	MAT alpha TRP1 csm2::KanMX6 mag1::NatNT2 CAN1	This study
mag1Δ	KBY 824-30A	Mat alpha ADE2 TRP1 LYS2 mag1::NatNT2 CAN1	This study

## Sheet: 1b
Supplemental File 1b: PCR Oligonucleotides Used in This Study
Name	Sequence	Purpose
Kan assembly rad55-SA Fwd	5' GAAGGTTAACGTACGCTGCAGGTCGAC 3'	rad55-S2,8,14A kanMX6 fusion
Kan assembly rad55-SA Rev	5' ATCGATGAATTCGAGCTCG 3'
Rad55 assembly Kan Fwd	5' ATGGCGCTTGGTATACCAC 3'
Rad55 assembly Kan Rev	5' AGCGTACGTTAACCTTCACTATCATAAATTATCTCC 3'
50bp Kan rad55-SA Fwd	5' AAGCTTTTAGATAAGGAAAAGAACTTATTAATAATATATAATATGAAAATATGGCGCTTGGTATACCAC 3'	rad55-S2,8,14A kanMX6 integration
50bp Kan rad55-SA Rev	5' CGTTTTTCCATTTTTTATTGTTTTCGGTTTTCGGTTTTTTTATTTTACTAATCGATGAATTCGAGCTCG 3'
Rad55.Check	5' GCAGCTGTATTGAAGATAGACGAC 3'	rad55-S2,8,14A kanMX6 integration verification
KanHisNat	5' GCAGCTGTATTGAAGATAGACGAC 3'
A2.V101R.F102E.Fwd	5' agtccagCGaGAAgggaagtggcacagtgtgccc 3'	ALKBH2 site directed mutagenesis
A2.V101R.F102E.Rev	5' acttcccTTCtCGctggactctggccagtgctcc 3'
rad55-SA assembly pGAD Fwd	5'cccaaaaaaagagatcgaattccATCCCGGGATGGCGCTTG 3'	rad55-S2,8,14A pGAD assembly
rad55-SA assembly pGAD Rev	5' tatctacgattcatagatctGATCTGCAGTTAACCTTCACTATCATAAATTATCTCC 3'
pGAD assembly rad55-SA Fwd	5' AGATCTATGAATCGTAGATACTGAAAAAC 3'
pGAD assembly rad55-SA Rev	5' cccggggaattcgatctc 3'

## Sheet: 1c
Supplemental File 1c: Unique Mutations in Diploid WT and csm2∆/csm2∆ MMS Exposed Yeast
Isolate	Genotype	Treatment	Mapping	Reference Position	Consensus Position	Variation Type	Length	Reference	Variants	Allele Variations	Frequencies	Counts	Coverage	Variant #1	Frequency of #1	Count of #1	Variant #2	Frequency of #2	Count of #2	Left Flank, Reference	Right Flank, Reference	Left Flank, Consensus	Rigth Flank, Consensus	Mutation	Distance Between Mutations	Complex
1133_C1	WT	MMS	II	358742	349402	SNP	1	T	2	T/A	52.5/47.5	31/28	59	T	52.542	31	A	47.458	28	TTGTCCAAATAAGTATCTAA	TCGCTCACGCTTGGATAATA	TTGTCCAAATAAGTATCTAA	TCGCTCACGCTTGGATAATA	A
1133_C1	WT	MMS	II	736011	725566	SNP	1	A	2	A/T	50.7/49.3	34/33	67	A	50.746	34	T	49.254	33	ACAGAGAGAGTCCACTTCAC	GATCTTGCTAACGGACCCAA	ACAGAGAGAGTCCACTTCAC	GATCTTGCTAACGGACCCAA	T	377269
1133_C1	WT	MMS	IV	291691	284813	SNP	1	A	2	A/G	50.0/50.0	28/28	56	A	50	28	G	50	28	CTGTCACAGCATTTATTTGC	CGTTCATCATTGGAGTGGCT	CTGTCACAGCATTTATTTGC	CGTTCATCATTGGAGTGGCT	G
1133_C1	WT	MMS	IV	608274	593288	SNP	1	T	2	C/T	52.0/48.0	26/24	50	C	52	26	T	48	24	AATTGACGTCATAATTACCG	CAACAACTAAATCTGTAGTC	AATTGACGTCATAATTACCG	CAACAACTAAATCTGTAGTC	C	316583
1133_C1	WT	MMS	IV	712180	691776	SNP	1	A	2	T/A	51.0/49.0	25/24	49	T	51.02	25	A	48.98	24	TGGCCATGTTATGCTGTGTC	TATTAAGCGCCAGGAGAAAA	TGGCCATGTTATGCTGTGTC	TATTAAGCGCCAGGAGAAAA	T	103906
1133_C1	WT	MMS	IV	776524	756108	SNP	1	A	2	A/T	54.3/45.7	25/21	46	A	54.348	25	T	45.652	21	CAAACGTGTTCAAAGGGAAT	TGAGCTCAGGGAAAGGATGG	CAAACGTGTTCAAAGGGAAT	TGAGCTCAGGGAAAGGATGG	T	64344
1133_C1	WT	MMS	V	442445	442382	SNP	1	C	2	G/C	54.4/45.6	31/26	57	G	54.386	31	C	45.614	26	GTTTAATTTGGCGGTGCCAT	AGGATTTACTCGCACATTGT	GTTTAATTTGGCGGTGCCAT	AGGATTTACTCGCACATTGT	G
1133_C1	WT	MMS	VI	51504	51112	SNP	1	A	2	G/A	52.7/47.3	39/35	74	G	52.703	39	A	47.297	35	ATTGGCAACTTTTCTCACAA	CAAAACGTTTAATGAGTACT	ATTGGCAACTTTTCTCACAA	CAAAACGTTTAATGAGTACT	G
1133_C1	WT	MMS	VI	162215	156865	SNP	1	C	2	A/C	51.6/48.4	33/31	64	A	51.562	33	C	48.438	31	ATTTATCCAAGGATAGTTTT	ACAAGAAAACAAGCGCAAGT	ATTTATCCAAGGATAGTTTT	ACAAGAAAACAAGCGCAAGT	A	110711
1133_C1	WT	MMS	VII	58231	51682	SNP	1	C	2	C/A	51.0/49.0	26/25	51	C	50.98	26	A	49.02	25	GTATTCAAAGTGGTTGTGCT	TTGTGGGTGGTGAAACTTCG	GTATTCAAAGTGGTTGTGCT	TTGTGGGTGGTGAAACTTCG	A
1133_C1	WT	MMS	VII	556968	547489	SNP	1	G	2	G/A	52.9/47.1	27/24	51	G	52.941	27	A	47.059	24	AATATATATATGTACATAGG	TGATTATGAAGATGAGTAAG	AATATATATATGTACATAGG	TGATTATGAAGATGAGTAAG	A	498737
1133_C1	WT	MMS	VII	579308	563256	SNP	1	T	2	T/A	50.7/49.3	35/34	69	T	50.725	35	A	49.275	34	AGCGATAATATCTCTTTACC	CAATCTTATATGCATGTTAT	AGCGATAATATCTCTTTACC	CAATCTTATATGCATGTTAT	A	22340
1133_C1	WT	MMS	VII	731148	714266	SNP	1	C	2	A/C	52.2/47.8	36/33	69	A	52.174	36	C	47.826	33	AGTCAAAAAGACTCCATGGC	AAGTTGGTTAAGGCGTGCGA	AGTCAAAAAGACTCCATGGC	AAGTTGGTTAAGGCGTGCGA	A	151840
1133_C1	WT	MMS	VIII	341363	333307	SNP	1	G	2	G/A	51.4/48.6	19/18	37	G	51.351	19	A	48.649	18	ACAGTATTAGTAGACATCCA	GAATAACCACTATACAGAAC	ACAGTATTAGTAGACATCCA	GAATAACCACTATACAGAAC	A
1133_C1	WT	MMS	IX	81824	65807	SNP	1	G	2	G/A	54.5/45.5	30/25	55	G	54.545	30	A	45.455	25	GAAGTACATAAAACAATTAC	GATTTTTTTATAGTACATGC	GAAGTACATAAAACAATTAC	GATTTTTTTATAGTACATGC	A
1133_C1	WT	MMS	X	688471	668262	SNP	1	C	2	C/A	53.8/46.2	42/36	78	C	53.846	42	A	46.154	36	AAAGCAGATGTTGAGAAAAG	ATCCACTGGTAGCTCAAACG	AAAGCAGATGTTGAGAAAAG	ATCCACTGGTAGCTCAAACG	A
1133_C1	WT	MMS	XI	203626	203634	SNP	1	T	2	T/G	52.8/47.2	19/17	36	T	52.778	19	G	47.222	17	TTTACGTAAGAAGACCAAGG	TTTCATGGATGAGCCTCATT	TTTACGTAAGAAGACCAAGG	TTTCATGGATGAGCCTCATT	G
1133_C1	WT	MMS	XI	314012	314020	SNP	1	T	2	G/T	50.7/49.3	38/37	75	G	50.667	38	T	49.333	37	AAGAATTAAATATACTCGAA	GCTTGTACCACTCCATTTCC	AAGAATTAAATATACTCGAA	GCTTGTACCACTCCATTTCC	G	110386
1133_C1	WT	MMS	XI	615856	615607	SNP	1	G	2	C/G	51.7/48.3	30/28	58	C	51.724	30	G	48.276	28	CGTATGTTAGCGACGACGTC	CCAACTCCACGGAACGCTAC	CGTATGTTAGCGACGACGTC	CCAACTCCACGGAACGCTAC	C	301844
1133_C1	WT	MMS	XII	253242	242167	SNP	1	G	2	A/G	52.5/47.5	21/19	40	A	52.5	21	G	47.5	19	TTCTGGAAGCCCTACGTACA	AGTGACAATATATTAGGGCA	TTCTGGAAGCCCTACGTACA	AGTGACAATATATTAGGGCA	A
1133_C1	WT	MMS	XII	730043	677263	SNP	1	C	2	A/C	51.1/48.9	24/23	47	A	51.064	24	C	48.936	23	GGTTCTTGGGTCAATGGTGA	CAAACATCTTCTTACATTGG	GGTTCTTGGGTCAATGGTGA	CAAACATCTTCTTACATTGG	A	476801
1133_C1	WT	MMS	XIII	416788	398268	SNP	1	T	2	T/A	55.0/45.0	33/27	60	T	55	33	A	45	27	CATCCTCAACTAACTTATCT	GATAGTTTTTTACCCTTTCT	CATCCTCAACTAACTTATCT	GATAGTTTTTTACCCTTTCT	A
1133_C1	WT	MMS	XIII	732934	714396	SNP	1	C	2	G/C	54.0/46.0	27/23	50	G	54	27	C	46	23	AAGCACGAAGAAATTGATAC	AAGAACTTGTATGTTATCAA	AAGCACGAAGAAATTGATAC	AAGAACTTGTATGTTATCAA	G	316146
1133_C1	WT	MMS	XIV	343819	334330	SNP	1	T	2	C/T	51.7/48.3	30/28	58	C	51.724	30	T	48.276	28	TTCTGTTGCATTTGCTTTTG	TGTTGCTGAGCATATTTTTG	TTCTGTTGCATTTGCTTTTG	TGTTGCTGAGCATATTTTTG	C
1133_C1	WT	MMS	XIV	443018	433520	SNP	1	G	2	A/G	51.1/48.9	24/23	47	A	51.064	24	G	48.936	23	AAATAAGTGGTTGTTTGGCC	AGCGGTCTAAGGCGCCTGAT	AAATAAGTGGTTGTTTGGCC	AGCGGTCTAAGGCGCCTGAT	A	99199
1133_C1	WT	MMS	XIV	443627	434128	SNP	1	G	2	A/G	54.2/45.8	32/27	59	A	54.237	32	G	45.763	27	GAACAGCAGTCAAAGTTCTG	ATCTTGGTCTCTTTTGGACT	GAACAGCAGTCAAAGTTCTG	ATCTTGGTCTCTTTTGGACT	A	609
1133_C1	WT	MMS	XVI	40367	32183	SNP	1	G	2	T/G	51.7/48.3	30/28	58	T	51.724	30	G	48.276	28	CTTAGTCAAACTTCTTTTTT	AAGGCACCAGGGTGCATAAA	CTTAGTCAAACTTCTTTTTT	AAGGCACCAGGGTGCATAAA	T
1133_C1	WT	MMS	XVI	770881	754221	SNP	1	G	2	A/G	53.3/46.7	32/28	60	A	53.333	32	G	46.667	28	CCAAATGCGGGTAACTATTT	TATAATATGTTTACATATTG	CCAAATGCGGGTAACTATTT	TATAATATGTTTACATATTG	A	730514
1133_C10	WT	MMS	IV	860442	839702	SNP	1	A	2	A/T	51.9/48.1	27/25	52	A	51.923	27	T	48.077	25	TCACCATTCCCATCTAACCG	TTCATTGCCTCTCGAAAATG	TCACCATTCCCATCTAACCG	TTCATTGCCTCTCGAAAATG	T
1133_C10	WT	MMS	IV	1523697	1485439	SNP	1	T	2	T/A	52.4/47.6	44/40	84	T	52.381	44	A	47.619	40	AATAAAAAACTACTTTTTTT	GATGATATAAATACCGTAGA	AATAAAAAACTACTTTTTTT	GATGATATAAATACCGTAGA	A	663255
1133_C10	WT	MMS	IV	1524512	1486254	SNP	1	T	2	T/A	52.6/47.4	41/37	78	T	52.564	41	A	47.436	37	AGTGAGGTGGCATAGTATTC	AATGTAAGGTCTGTGTAAGT	AGTGAGGTGGCATAGTATTC	AATGTAAGGTCTGTGTAAGT	A	815
1133_C10	WT	MMS	VII	26655	20162	SNP	1	A	2	G/A	53.8/46.3	43/37	80	G	53.75	43	A	46.25	37	TTAGGAATAGATAATCTGAC	TAGACGAGAATTCTTCATAA	TTAGGAATAGATAATCTGAC	TAGACGAGAATTCTTCATAA	G
1133_C10	WT	MMS	X	171705	157762	SNP	1	T	2	T/C	51.2/48.8	21/20	41	T	51.22	21	C	48.78	20	CTTAAAACTTTACCATCGGG	CCGGTTTGCAATTCGATGTG	CTTAAAACTTTACCATCGGG	CCGGTTTGCAATTCGATGTG	C
1133_C10	WT	MMS	X	396847	382407	SNP	1	A	2	T/A	51.8/48.2	29/27	56	T	51.786	29	A	48.214	27	TCAATATTAATAAGCAAGAT	TTTTTTGAAATGAAGAACCT	TCAATATTAATAAGCAAGAT	TTTTTTGAAATGAAGAACCT	T	225142
1133_C10	WT	MMS	XII	640372	590781	SNP	1	C	2	C/T	52.9/47.1	27/24	51	C	52.941	27	T	47.059	24	TTTCACTCTATATAAAGTAA	TGCCACGGCAGAAATAGGAT	TTTCACTCTATATAAAGTAA	TGCCACGGCAGAAATAGGAT	T
1133_C10	WT	MMS	XVI	142804	129903	SNP	1	T	2	C/T	52.9/47.1	27/24	51	C	52.941	27	T	47.059	24	CAATCATCGCATTCAGATCG	CCGCAGGGCACTCCAAAAAA	CAATCATCGCATTCAGATCG	CCGCAGGGCACTCCAAAAAA	C
1133_C11	WT	MMS	II	212758	210553	SNP	1	A	2	A/G	53.6/46.4	37/32	69	A	53.623	37	G	46.377	32	TGTTGTTGTGGTTGTTGCAT	GCACCCCCAGTGTTAAAAGT	TGTTGTTGTGGTTGTTGCAT	GCACCCCCAGTGTTAAAAGT	G
1133_C11	WT	MMS	II	464217	455647	SNP	1	C	2	T/C	54.8/45.2	23/19	42	T	54.762	23	C	45.238	19	TGTGCTTGTGCTTGTGCTTG	GCTTGTGCTTGTGCTTGTGC	TGTGCTTGTGCTTGTGCTTG	GCCTGTGCTTGCGCCTGTGC	T	251459	Complex
1133_C11	WT	MMS	II	464220	455650	SNP	1	T	2	C/T	54.8/45.2	23/19	42	C	54.762	23	T	45.238	19	GCTTGTGCTTGTGCTTGCGC	TGTGCTTGTGCTTGTGCTTG	GCTTGTGCTTGTGCTTGTGC	TGTGCTTGCGCCTGTGCTTG	C	3	Complex
1133_C11	WT	MMS	II	464229	455659	SNP	1	T	2	C/T	50.0/50.0	18/18	36	C	50	18	T	50	18	TGTGCTTGCGCTTGTGCTTG	GCTTGTGCTTGAGCTTGTGC	TGTGCTTGTGCCTGTGCTTG	GCCTGTGCTTGTGCTTGTGC	C	9	Complex
1133_C11	WT	MMS	II	464232	455662	SNP	1	T	2	C/T	50.0/50.0	18/18	36	C	50	18	T	50	18	GCTTGCGCTTGTGCTTGTGC	TGTGCTTGAGCTTGTGCTTG	GCTTGTGCCTGTGCTTGCGC	TGTGCTTGTGCTTGTGCTTG	C	3	Complex
1133_C11	WT	MMS	II	464241	455671	SNP	1	A	2	T/A	51.4/48.6	18/17	35	T	51.429	18	A	48.571	17	TGTGCTTGTGCTTGTGCTTG	GCTTGTGCTTGTGCTTGAGC	TGTGCTTGCGCCTGTGCTTG	GCTTGTGCTTGCGCTTGTGC	T	9	Complex
1133_C11	WT	MMS	II	464253	455683	SNP	1	T	2	C/T	51.5/48.5	17/16	33	C	51.515	17	T	48.485	16	TGTGCTTGAGCTTGTGCTTG	GCTTGAGCTTGTGCTTGAGC	TGTGCTTGTGCTTGTGCTTG	GCTTGTGCTTGTGCTTGTGC	C	12
1133_C11	WT	MMS	II	571725	562423	SNP	1	G	2	A/G	50.7/49.3	35/34	69	A	50.725	35	G	49.275	34	ATAGGATGATCCTTGCTTAT	AACGCTATCGAGAAACTTAT	ATAGGATGATCCTTGCTTAT	AACGCTATCGAGAAACTTAT	A	107472
1133_C11	WT	MMS	III	30355	29578	SNP	1	G	2	G/T	50.5/49.5	50/49	99	G	50.505	50	T	49.495	49	CTTCTGGAGTTTAATTTGTT	TATTGATGAGATAATATTGT	CTTCTGGAGTTTAATTTGTT	TATTGATGAGATAATATTGT	T
1133_C11	WT	MMS	IV	2113	1855	SNP	1	T	2	T/A	51.2/48.8	21/20	41	T	51.22	21	A	48.78	20	TCCTTATCGAAACAACTCAT	CAGTTTTGCAAAGAGATTAC	TCCTTATCGAAACAACTCAC	CAGTTTTGCAAAGAGATTAC	A
1133_C11	WT	MMS	IV	188637	181898	SNP	1	C	2	C/G	52.3/47.7	46/42	88	C	52.273	46	G	47.727	42	AAAGCAGGTAAGCTCTTCCA	ACAGTAGAGATAGTTGCATC	AAAGCAGGTAAGCTCTTCCA	ACAGTAGAGATAGTTGCATC	G	186524
1133_C11	WT	MMS	IV	521048	512740	SNP	1	T	2	T/A	52.1/47.9	37/34	71	T	52.113	37	A	47.887	34	AATCCGGGTAGGACCTTTTC	ATTTTTTAACCCTCTTGTTT	AATCCGGGTAGGACCTTTTC	ATTTTTTAACCCTCTTGTTT	A	332411
1133_C11	WT	MMS	V	236441	236419	SNP	1	C	2	T/C	52.7/47.3	29/26	55	T	52.727	29	C	47.273	26	AGCAGCACAACCCTTACCGA	ATCACCGTAACCAGCAACAA	AGCAGCACAACCCTTACCGA	ATCACCGTAACCAGCAACAA	T
1133_C11	WT	MMS	VI	43173	42798	SNP	1	A	2	A/G	50.5/49.5	46/45	91	A	50.549	46	G	49.451	45	AAGTGTGAAAAACGATCTGG	GAAACTAAGAAACAAACTAA	AAGTGTGAAAAACGATCTGG	GAAACTAAGAAACAAACTAA	G
1133_C11	WT	MMS	VII	67920	61509	SNP	1	G	2	G/T	52.4/47.6	44/40	84	G	52.381	44	T	47.619	40	ACAATGTAAGAAATGGAACT	TGGAAAGTATTACCAATTGG	ACAATGTAAGAAATGGAACT	TGGAAAGTATTACCAATTGG	T
1133_C11	WT	MMS	VII	180169	173760	SNP	1	C	2	C/A	52.2/46.4	36/32	69	C	52.174	36	A	46.377	32	CAAGTGTTGATTTTTTTTCT	CTTATAGTACACGAATCGTC	CAAGTGTTGATTTTTTTTCT	CTTATAGTACACGAATCGTC	A	112249
1133_C11	WT	MMS	VIII	541267	529562	SNP	1	T	2	T/G	53.8/46.3	43/37	80	T	53.75	43	G	46.25	37	TGCTGCTGCTGCTGCTATTG	TATTGTTGTTGTTGTTGTTT	TGCTGCTGCTGCTGCTATTG	TATTGTTGTTGTTGTTGTTT	G
1133_C11	WT	MMS	IX	153006	136188	SNP	1	G	2	G/C	50.7/49.3	34/33	67	G	50.746	34	C	49.254	33	CGCTAAAAAATGGACTAACA	AGCAGGAATTCATAATGACA	CGCTAAAAAATGGACTAACA	AGCAGGAATTCATAATGACA	C
1133_C11	WT	MMS	IX	183439	166621	SNP	1	G	2	T/G	52.6/47.4	30/27	57	T	52.632	30	G	47.368	27	CCAAGAAGTCATAAAAATAA	TGGTCTCTAGCGGGATCGAA	CCAAGAAGTCATAAAAATAA	TGGTCTCTAGCGGGATCGAA	T	30433
1133_C11	WT	MMS	X	74477	60393	SNP	1	C	2	G/C	50.7/49.3	37/36	73	G	50.685	37	C	49.315	36	GTGGTACCAGAACCAAGACC	CAGGACCAGGTGGTCAAGCC	GTGGTACCAGAACCAAGACC	CAGGACCAGGTGGTCAAGCC	G
1133_C11	WT	MMS	X	629552	609649	SNP	1	A	2	T/A	53.9/46.1	41/35	76	T	53.947	41	A	46.053	35	CCATTATATAATATACAGTA	TACAATTAGAGGCAGGTTTT	CCATTATATAATATACAGTA	TACAATTAGAGGCAGGTTTT	T	555075
1133_C11	WT	MMS	XI	556787	556561	SNP	1	C	2	C/G	52.9/47.1	27/24	51	C	52.941	27	G	47.059	24	AGAGAAACTTTGACGAAAGA	GAGCATACGTCGGAATTATT	AGAGAAACTTTGACGAAAGA	GAGCATACGTCGGAATTATT	G
1133_C11	WT	MMS	XII	173654	166745	SNP	1	G	2	A/G	50.6/49.4	40/39	79	A	50.633	40	G	49.367	39	TAGATTACCATGAGCAAAGT	CCTGCCAATGCCTCCAACCT	TAGATTACCATGAGCAAAGT	CCTGCCAATGCCTCCAACCT	A
1133_C11	WT	MMS	XIII	105817	101538	SNP	1	A	2	A/T	51.8/48.2	29/27	56	A	51.786	29	T	48.214	27	GCAACAGCTCCTCCTTTTCA	TTACCAATAGCAAGGGAAAG	GCAACAGCTCCTCCTTTTCA	TTACCAATAGCAAGGGAAAG	T
1133_C11	WT	MMS	XIII	362957	349098	SNP	1	C	2	T/C	54.4/45.6	37/31	68	T	54.412	37	C	45.588	31	TGACCTTGGCATTCGCACCG	TTGACACTACAGGACGAATA	TGACCTTGGCATTCGCACCG	TTGACACTACAGGACGAATA	T	257140
1133_C11	WT	MMS	XIV	75918	70242	SNP	1	A	2	T/A	54.8/45.2	46/38	84	T	54.762	46	A	45.238	38	TCCTCGTCACTAACTGCCCC	TTTGAGCTTATTTCATTTAA	TCCTCGTCACTAACTGCCCC	TTTGAGCTTATTTCATTTAA	T
1133_C11	WT	MMS	XIV	354765	345449	SNP	1	T	2	T/C	50.7/49.3	34/33	67	T	50.746	34	C	49.254	33	GAGGTTCCACTGGGTACGGA	CTATGCAGTAAAGCACGTTT	GAGGTTCCACTGGGTACGGA	CTATGCAGTAAAGCACGTTT	C	278847
1133_C11	WT	MMS	XV	43359	43322	SNP	1	T	2	C/T	54.9/45.1	45/37	82	C	54.878	45	T	45.122	37	AATATTTTATAGCACCTTAT	AATATCAATGCTGCAATACC	AATATTTCATAGTACCTTAT	GATATCGATCCTGCGACACC	C
1133_C11	WT	MMS	XV	655707	647833	SNP	1	T	2	T/C	52.3/47.7	45/41	86	T	52.326	45	C	47.674	41	TTGCGCAGGTTTTGAATTTG	TGTTGACGTTTTATTCCTTG	TTGCGCAGGTTTTGAATTTG	TGTTGACGTTTTATTCCTTG	C	612348
1133_C11	WT	MMS	XVI	27578	19485	SNP	1	A	2	A/T	51.3/48.7	40/38	78	A	51.282	40	T	48.718	38	GATTGATGTCATTGACATCA	ACAAAATCCTATCTTCAGAG	GATTGATGTCATTGACATCA	ACAAAATCCTATCTTCAGAG	T
1133_C11	WT	MMS	XVI	577918	561634	SNP	1	T	2	T/C	51.4/48.6	36/34	70	T	51.429	36	C	48.571	34	TGTGTGTAGTCTGATGAATT	AGCAGACGATCTTGTAATAG	TGTGTGTAGTCTGATGAATT	AGCAGACGATCTTGTAATAG	C	550340
1133_C11	WT	MMS	XVI	627534	611250	SNP	1	G	2	A/G	51.3/48.7	39/37	76	A	51.316	39	G	48.684	37	CATCTATTACCCGCTCGCCC	GTCGTTTGGATGCGTGGGTG	CATCTATTACCCGCTCGCCC	GTCGTTTGGATGCGTGGGTG	A	49616
1133_C11	WT	MMS	III	70548	69771	DIP	1	G	2	G/-	52.4/47.6	54/49	103	G	52.427	54	-	47.573	49	GGCGGCGGGAGCCAAAGTAT	GGTGCTTCCGGCCTGGCTGC	GGCGGCGGGAGCCAAAGTAT	GGTGCTTCCGGCCTGGCTGC	-
1133_C11	WT	MMS	III	300339	293951	DIP	1	T	2	-/T	50.7/48.0	38/36	75	-	50.667	38	T	48	36	AAATATCCCCATTTGACGGA	TTTTGAAAAATGAGCCCGCT	AAATATCCCCATTTGACGGA	TTTTGAAAAATGAGCCCGCT	-	229791
1133_C11	WT	MMS	XI	665061	664810	DIP	1	-	2	-/A	50.6/49.4	45/44	89	-	50.562	45	A	49.438	44	TGTTCAATATAAGAATATTG	AAAAAAATATTAAAATGAAA	TGTTCAATATAAGAATATTG	AAAAAATATTAAAATGAAAA	A
1133_C2	WT	MMS	II	9595	7644	SNP	1	G	2	T/G	53.7/46.3	44/38	82	T	53.659	44	G	46.341	38	AAATTCGTGGAGGGTTGGCC	AGTGGTCTAAGGCGGCAGAC	AAATTCGTGGAGGGTTGGCC	AGTGGTCTAAGGCGGCAGAC	T
1133_C2	WT	MMS	II	386846	377416	SNP	1	A	2	A/G	50.9/49.1	27/26	53	A	50.943	27	G	49.057	26	AAGTACCATATAAAGCACAG	CCGAACAGGACTTTAATTTT	AAGTACCATATAAAGCACAG	CCGAACAGGACTTTAATTTT	G	377251
1133_C2	WT	MMS	III	76941	76048	SNP	1	C	2	T/C	51.4/48.6	37/35	72	T	51.389	37	C	48.611	35	GGCAATAAACTCTGAACCAC	AAAGGCAAAAGCAGCAGTCA	GGCAATAAACTCTGAACCAC	AAAGGCAAAAGCAGCAGTCA	T
1133_C2	WT	MMS	IV	289351	283013	SNP	1	G	2	A/G	50.9/49.1	28/27	55	A	50.909	28	G	49.091	27	CAGTTGAAGAAATCACTATA	AAGGGGACGGTCCGTCGTAT	CAGTTGAAGAAATCACTATA	AAGGGGACGGTCCGTCGTAT	A
1133_C2	WT	MMS	IV	631457	616351	SNP	1	A	2	A/C	50.0/50.0	24/24	48	A	50	24	C	50	24	AACCGGCGGTTCTGTTTTGA	GCGACAATCTAAGCCAATGA	AACCGGCGGTTCTGTTTTGA	GCGACAATCTAAGCCAATGA	C	342106
1133_C2	WT	MMS	IV	1005897	978943	SNP	1	A	2	A/G	50.0/50.0	29/29	58	A	50	29	G	50	29	TACTAAGAGATTCTGAAATT	CAGCCATAAGTACGAAGGAA	TACTAAGAGATTCTGAAATT	CAGCCATAAGTACGAAGGAA	G	374440
1133_C2	WT	MMS	VII	700972	684977	SNP	1	A	2	A/T	53.7/46.3	29/25	54	A	53.704	29	T	46.296	25	ACTCCTCATAGGGGGCTCGA	CCCCTGACATTTCGGTATCC	ACTCCTCATAGGGGGCTCGA	CCCCTGACATTTCGGTATCC	T
1133_C2	WT	MMS	VII	952776	926185	SNP	1	T	2	C/T	52.3/47.7	34/31	65	C	52.308	34	T	47.692	31	ACCATACCTTGTTTTTCTTG	CTGGCTTTATCAACTACAAA	ACCATACCTTGTTTTTCTTG	CTGGCTTTATCAACTACAAA	C	251804
1133_C2	WT	MMS	VII	960390	933799	SNP	1	G	2	G/T	50.0/50.0	32/32	64	G	50	32	T	50	32	CCAAAGAGTACGTTGCTTCA	ATATTGTTGAATTTACTGTT	CCAAAGAGTACGTTGCTTCA	ATATTGTTGAATTTACTGTT	T	7614
1133_C2	WT	MMS	VIII	159748	153454	SNP	1	C	2	T/C	54.1/45.9	33/28	61	T	54.098	33	C	45.902	28	TCACGTCTCCAACCCAATCC	ACTTGGCCGTGGATTGGGTT	TCACGTCTCCAACCCAATCC	ACTTGGCCGTGGATTGGGTT	T
1133_C2	WT	MMS	VIII	171978	165686	SNP	1	T	2	G/T	51.6/48.4	33/31	64	G	51.562	33	T	48.438	31	TCATCAATTATCAAAACTTT	GTATACCTCCATGCGGCCAA	TCATCAATTATCAAAACTTT	GTATACCTCCATGCGGCCAA	G	12230
1133_C2	WT	MMS	IX	338848	322721	SNP	1	G	2	G/A	51.7/48.3	30/28	58	G	51.724	30	A	48.276	28	CTTTGTCAAGGCGAAATTTT	GAGATTTCAGACGCATGATA	CTTTGTCAAGGCGAAATTTT	GAGATTTCAGACGCATGATA	A
1133_C2	WT	MMS	X	59409	45329	SNP	1	A	2	A/C	54.3/45.7	38/32	70	A	54.286	38	C	45.714	32	AGAAGGTTTCATTGTGGAGA	CAAATCGCAATATTGTGCAA	AGAAGGTTTCATTGTGGAGA	CAAATCGCAATATTGTGCAA	C
1133_C2	WT	MMS	X	179259	165178	SNP	1	G	2	A/G	51.7/48.3	31/29	60	A	51.667	31	G	48.333	29	CTTCGGTACTTGATGAGGTG	ATGTGCTTTGCACACCATTT	CTTCGGTACTTGATGAGGTG	ATGTGCTTTGCACACCATTT	A	119850
1133_C2	WT	MMS	X	369828	355542	SNP	1	T	2	T/A	50.7/49.3	34/33	67	T	50.746	34	A	49.254	33	ACCTCCAGAATAAAGTTTGA	CTTGTTGATGGTTCCAATTT	ACCTCCAGAATAAAGTTTGA	CTTGTTGATGGTTCCAATTT	A	190569
1133_C2	WT	MMS	X	619650	599562	SNP	1	T	2	T/A	54.5/45.5	36/30	66	T	54.545	36	A	45.455	30	TGTACCAAATTTTCTTGGTC	TGCAATATTGTGATATGATG	TGTACCAAATTTTCTTGGTC	TGCAATATTGTGATATGATG	A	249822
1133_C2	WT	MMS	XI	19147	19148	SNP	1	T	2	T/C	52.6/47.4	40/36	76	T	52.632	40	C	47.368	36	TGCAGAAAAAGATATCATTA	TTTTATCATCCCCCTAATAA	TGCAGAAAAAGATATCATTA	TTTTATCATCCCCCTAATAA	C
1133_C2	WT	MMS	XI	100407	100412	SNP	1	A	2	T/A	53.2/46.8	42/37	79	T	53.165	42	A	46.835	37	AAAGTACATTGGGCCTTTTC	TACTTGTTATCACTTACATT	AAAGTACATTGGGCCTTTTC	TACTTGTTATCACTTACATT	T	81260
1133_C2	WT	MMS	XII	159112	151496	SNP	1	C	2	T/C	54.5/45.5	24/20	44	T	54.545	24	C	45.455	20	TAAGTAAGTGACCACAGGTT	CATGAAAATGTAAGCAGCAG	TAAGTAAGTGACCACAGGTT	CATGAAAATGTAAGCAGCAG	T
1133_C2	WT	MMS	XII	493227	447708	SNP	1	G	2	A/G	51.2/48.8	22/21	43	A	51.163	22	G	48.837	21	TAAAAGCCTCCGTGTATTAC	GAACTTGGATGCTGTTCTTG	TAAAAGCCTCCGTGTATTAC	GAACTTGGATGCTGTTCTTG	A	334115
1133_C2	WT	MMS	XII	499022	453503	SNP	1	G	2	T/G	53.8/46.2	21/18	39	T	53.846	21	G	46.154	18	CTTCTGACACTATTGACAAT	TCAAGTCCAAGATCCAAGAC	CTTCTGACACTATTGACAAT	TCAAGTCCAAGATCCAAGAC	T	5795
1133_C2	WT	MMS	XIII	244513	230253	SNP	1	A	2	G/A	55.0/45.0	33/27	60	G	55	33	A	45	27	TGGGCTAAATGGACGCTCTA	CACTGTGTGGTCCATGTTTG	TGGGCTAAATGGACGCTCTA	CACTGTGTGGTCCATGTTTG	G
1133_C2	WT	MMS	XIII	885804	867708	SNP	1	C	2	T/C	54.1/45.9	40/34	74	T	54.054	40	C	45.946	34	GTCATATTGTTGTAAAGACG	AGGTGCCGTGATTGCGTTTA	GTCATATTGTTGTAAAGACG	AGGTGCCGTGATTGCGTTTA	T	641291
1133_C2	WT	MMS	XVI	184646	171628	SNP	1	T	2	C/T	52.1/47.9	37/34	71	C	52.113	37	T	47.887	34	TCGATGGTTTTGACCATTAA	TTTGACACTTTTAGTCGTGA	TCGATGGTTTTGACCATTAA	TTGGACACTTTTAGTCGTGA	C		Complex
1133_C2	WT	MMS	XVI	184649	171631	SNP	1	T	2	G/T	50.7/49.3	36/35	71	G	50.704	36	T	49.296	35	ATGGTTTTGACCATTAATTT	GACACTTTTAGTCGTGAAAC	ATGGTTTTGACCATTAACTT	GACACTTTTAGTCGTGAAAC	G	3	Complex
1133_C2	WT	MMS	XVI	585534	568506	SNP	1	C	2	C/T	51.7/48.3	30/28	58	C	51.724	30	T	48.276	28	ATTAGGAGATCTTGACTTGT	TGTATATGATGATTGTTTTT	ATTAGGAGATCTTGACTTGT	TGTATATGATGATTGTTTTT	T	400885
1133_C2	WT	MMS	IV	1200820	1167411	DIP	1	G	2	G/-	52.9/47.1	37/33	70	G	52.857	37	-	47.143	33	ACGCTTTTCTATAAAAATTT	ATCGCCTAATGAATACAAAA	ACGCTTTTCTATAAAAATTT	ATCGCCTAATGAATACAAAA	-
1133_C3	WT	MMS	I	89660	88656	SNP	1	C	2	C/T	52.2/47.8	48/44	92	C	52.174	48	T	47.826	44	GAGCATGAATTTCCTGTTAA	ACTATCTAAAATCAATTTTC	GAGCATGAATTTCCTGTTAA	ACTATCTAAAATCAATTTTC	T
1133_C3	WT	MMS	II	63068	60795	SNP	1	T	2	A/T	54.3/45.7	44/37	81	A	54.321	44	T	45.679	37	CTATCGAAGCAGTGACTCTC	CCCTATCAGCCGGTAAATTT	CTATCGAAGCAGTGACTCTC	CCCTATCAGCCGGTAAATTT	A
1133_C3	WT	MMS	II	430421	420395	SNP	1	A	2	G/A	54.0/46.0	34/29	63	G	53.968	34	A	46.032	29	ATGAAATATTGAGCAGTGTC	TGACATCTCTTAGAATTAGA	ATGAAATATTGAGCAGTGTC	TGACATCTCTTAGAATTAGA	G	367353
1133_C3	WT	MMS	II	465732	455706	SNP	1	G	2	G/T	50.0/50.0	31/31	62	G	50	31	T	50	31	TGTTGTTGTTGCTGTTGAGC	GGTTGTTCCATTATTGTTTG	TGTTGTTGTTGCTGTTGAGC	GGTTGTTCCATTATTGTTTG	T	35311
1133_C3	WT	MMS	II	693280	682144	SNP	1	C	2	C/T	54.1/45.9	33/28	61	C	54.098	33	T	45.902	28	AAATCATGAAAACTGTTCGA	CGGATAAACAGTGTGTTCTA	AAATCATGAAAACTGTTCGA	CGGATAAACAGTGTGTTCTA	T	227548
1133_C3	WT	MMS	II	716170	705034	SNP	1	C	2	A/C	50.7/49.3	37/36	73	A	50.685	37	C	49.315	36	CAATGTAGTTCAGACCCGTA	TCTTAGGGCTTTCCACGGAA	CAATGTAGTTCAGACCCGTA	TCTTAGGGCTTTCCACGGAA	A	22890
1133_C3	WT	MMS	IV	173773	167158	SNP	1	A	2	A/T	50.6/49.4	39/38	77	A	50.649	39	T	49.351	38	CCTTCACCAAGATTACCCAA	GACCGTATCTATTCCAAGGA	CCTTCACCAAGATTACCCAA	GACCGTATCTATTCCAAGGA	T
1133_C3	WT	MMS	IV	377730	371120	SNP	1	G	2	G/T	53.8/46.2	35/30	65	G	53.846	35	T	46.154	30	GATCAATAGTGAAAAAATTG	ATAATCTTAATCTTGTACAT	GATCAATAGTGAAAAAATTG	ATAATCTTAATCTTGTACAT	T	203957
1133_C3	WT	MMS	IV	464665	457273	SNP	1	A	2	A/C	52.4/47.6	33/30	63	A	52.381	33	C	47.619	30	AAGTGCCACTTTTCACACGG	CGAAGATTTCTTTACAGATT	AAGTGCCACTTTTCACACGG	CGAAGATTTCTTTACAGATT	C	86935
1133_C3	WT	MMS	IV	586563	571137	SNP	1	T	2	T/C	51.3/48.7	39/37	76	T	51.316	39	C	48.684	37	ATTGCTGTTGTTGCTGTTGT	GAAGATGATTTAATGGAGTA	ATTGCTGTTGTTGCTGTTGT	GAAGATGATTTAATGGAGTA	C	121898
1133_C3	WT	MMS	IV	726172	705424	SNP	1	T	2	T/A	54.2/45.8	39/33	72	T	54.167	39	A	45.833	33	CTCATCAAAAATGAGTTCAA	GGCATCATAATAACTAGTAT	CTCATCAAAAATGAGTTCAA	GGCATCATAATAACTAGTAT	A	139609
1133_C3	WT	MMS	IV	885827	863367	SNP	1	A	2	T/A	51.3/48.7	40/38	78	T	51.282	40	A	48.718	38	GTGATTGGAAGGAACTGCCA	ATCGGTGAAAATATTAGAAT	GTGATTGGAAGGAACTGCCA	ATCGGTGAAAATATTAGAAT	T	159655
1133_C3	WT	MMS	IV	1215852	1177548	SNP	1	T	2	T/A	51.7/48.3	30/28	58	T	51.724	30	A	48.276	28	ATCCTTCAATTCAACAATGG	TGACTTAACTCTTTTGACCT	ATCCTTCAATTCAACAATGG	TGACTTAACTCTTTTGACCT	A	330025
1133_C3	WT	MMS	IV	1362323	1323711	SNP	1	A	2	A/G	54.2/45.8	32/27	59	A	54.237	32	G	45.763	27	CGCCATATATATATTTATAA	CATTCATCTGTGTGATCCAG	CGCCATATATATATTTATAA	CATTCATCTGTGTGATCCAG	G	146471
1133_C3	WT	MMS	IV	1436949	1398337	SNP	1	G	2	A/G	54.3/45.7	38/32	70	A	54.286	38	G	45.714	32	AATGCGCTCCTCCATGTTTA	ATGTGTGAGTCGCGCTCATT	AATGCGCTCCTCCATGTTTA	ATGTGTGAGTCGCGCTCATT	A	74626
1133_C3	WT	MMS	V	322621	322611	SNP	1	A	2	T/A	51.8/48.2	29/27	56	T	51.786	29	A	48.214	27	TCTAGTTATTTCACTTTTTG	TACTTGTCAACTATCTTAGT	TCTAGTTATTTCACTTTTTG	TACTTGTCAACTATCTTAGT	T
1133_C3	WT	MMS	VII	401572	395127	SNP	1	A	2	A/T	51.3/48.7	40/38	78	A	51.282	40	T	48.718	38	GTCTCCACGGTGAAAGCGTG	TGTGATAGCCGTTACACTAT	GTCTCCACGGTGAAAGCGTG	TGTGATAGCCGTTACACTAT	T
1133_C3	WT	MMS	VII	960835	934693	SNP	1	A	2	A/T	53.6/46.4	45/39	84	A	53.571	45	T	46.429	39	CTGGATTCAATCTTCCTATG	TGAAAAGACTCAAGCATTCA	CTGGATTCAATCTTCCTATG	TGAAAAGACTCAAGCATTCA	T	559263
1133_C3	WT	MMS	VII	1073900	1047765	SNP	1	G	2	G/A	54.1/45.9	33/28	61	G	54.098	33	A	45.902	28	AAAATCTCGAGCTAGCTGAG	GTTTTGGGAGCAGTCAAAGG	AAAATCTCGAGCTAGCTGAG	GTTTTGGGAGCAGTCAAAGG	A	113065
1133_C3	WT	MMS	VIII	293681	285602	SNP	1	C	2	A/C	50.9/49.1	27/26	53	A	50.943	27	C	49.057	26	AAAAAAAGAACTCGGAATAT	AAAAATTCCGGCTCAAAGGA	AAAAAAAGAACTCGGAATAT	AAAAATTCCGGCTCAAAGGA	A
1133_C3	WT	MMS	VIII	358585	350506	SNP	1	A	2	A/T	50.0/50.0	40/40	80	A	50	40	T	50	40	TCCGCTTACTATTTGTTATC	GTTCCCTTCATATCTACATA	TCCGCTTACTATTTGTTATC	GTTCCCTTCATATCTACATA	T	64904
1133_C3	WT	MMS	VIII	450956	442878	SNP	1	G	2	A/G	50.0/50.0	28/28	56	A	50	28	G	50	28	TTGCCATATGCAAAATTCAT	AAGTGTGATACCAAGTCAGC	TTGCCATATGCAAAATTCAT	AAGTGTGATACCAAGTCAGC	A	92371
1133_C3	WT	MMS	VIII	552188	537543	SNP	1	A	2	A/G	52.6/47.4	2018-10-09	19	A	52.632	10	G	47.368	9	AAGTTATCTGACATTGACAA	ATCGGAACTCAAACGGAAAT	AAGTTATCTGACATTGACAA	ATCGGAACTCAAACGGAAAT	G	101232
1133_C3	WT	MMS	X	119638	105847	SNP	1	C	2	C/T	54.3/45.7	19/16	35	C	54.286	19	T	45.714	16	TATAGTAGTCTACTAAGTAG	AAAAAAGTAGAAACTCTGTC	TATAGTAGTCTACTAAGTAG	AAAAAAGTAGAAACTCTGTC	T
1133_C3	WT	MMS	X	317637	303847	SNP	1	G	2	G/T	50.7/49.3	37/36	73	G	50.685	37	T	49.315	36	ACACCTAGCTTCATTGACTT	CTGCTGAATGTAGCCCAGGA	ACACCTAGCTTCATTGACTT	CTGCTGAATGTAGCCCAGGA	T	197999
1133_C3	WT	MMS	X	745745	719595	SNP	1	T	2	T/G	54.5/45.5	2018-06-05	11	T	54.545	6	G	45.455	5	GTGTGGGTGTGGTGTGTGTG	GGGTGT	GTGTGGGTGTGGTGTGTGTG	GGGTGT	G	428108
1133_C3	WT	MMS	XI	239060	239072	SNP	1	G	2	G/T	50.0/50.0	28/28	56	G	50	28	T	50	28	ACTAGATTGGATTAATTCGT	ATCGAACTAGTTATTAAATT	ACTAGATTGGATTAATTCGT	ATCGAACTAGTTATTAAATT	T
1133_C3	WT	MMS	XI	314072	314084	SNP	1	G	2	A/G	52.7/47.3	48/43	91	A	52.747	48	G	47.253	43	TTACGAGTAAAAAAGTGACC	ATATAGAATGTCTGATGAAA	TTACGAGTAAAAAAGTGACC	ATATAGAATGTCTGATGAAA	A	75012
1133_C3	WT	MMS	XI	517824	517622	SNP	1	A	2	A/T	53.7/46.3	22/19	41	A	53.659	22	T	46.341	19	TCATTGATTGCAAATGCACA	ATTCCGGAGATTGAACAGCC	TCATTGATTGCAAATGCACA	ATTCCGGAGATTGAACAGCC	T	203752
1133_C3	WT	MMS	XI	665841	665595	SNP	1	T	2	G/T	50.0/50.0	40/40	80	G	50	40	T	50	40	ATATGGGAATAGAAATAGGA	GCCATTGTATCATAGCACCT	ATATGGGAATAGAAATAGGA	GCCATTGTATCATAGCACCT	G	148017
1133_C3	WT	MMS	XII	27961	20520	SNP	1	A	2	A/G	52.7/47.3	39/35	74	A	52.703	39	G	47.297	35	GCAACTTTGTTTGGTCGCAA	GAAAGTGTACCATTCGTATA	GCAACTTTGTTTGGTCGCAA	GAAAGTGTACCATTCGTATA	G
1133_C3	WT	MMS	XII	114266	106826	SNP	1	G	2	A/G	54.9/45.1	45/37	82	A	54.878	45	G	45.122	37	AGTTTTTTAATCTCGCCCAC	TTTTTAAAAAATCCTGTGAT	AGTTTTTTAATCTCGCCCAC	TTTTTAAAAAATCCTGTGAT	A	86305
1133_C3	WT	MMS	XII	726759	674979	SNP	1	G	2	A/G	52.9/47.1	37/33	70	A	52.857	37	G	47.143	33	TTGATTGGCGTGATCTAATT	AACCAGTCGCAAAGCTGGGA	TTGATTGGCGTGATCTAATT	AACCAGTCGCAAAGCTGGGA	A	612493
1133_C3	WT	MMS	XII	1030574	976344	SNP	1	T	2	A/T	50.7/49.3	35/34	69	A	50.725	35	T	49.275	34	GTATCAAGTCATAATTCTAA	TCTTAGTTTAACTTCAGCAA	GTATCAAGTCATAATTCTAA	TCTTAGTTTAACTTCAGCAA	A	303815
1133_C3	WT	MMS	XII	1055985	1001755	SNP	1	T	2	G/T	53.8/46.2	35/30	65	G	53.846	35	T	46.154	30	TGTTTTCATGGGGCTGGAAG	GAATAATGAATTCGTTCTTC	TGTTTTCATGGGGCTGGAAG	GAATAATGAATTCGTTCTTC	G	25411
1133_C3	WT	MMS	XIII	39380	34667	SNP	1	G	2	G/T	54.8/45.2	46/38	84	G	54.762	46	T	45.238	38	GGATTTACTATCAAGAATGT	TCTCCATCAGTGTTTTTGTT	GGATTTACTATCAAGAATGT	TCTCCATCAGTGTTTTTGTT	T
1133_C3	WT	MMS	XIII	163776	159066	SNP	1	G	2	G/A	53.2/46.8	41/36	77	G	53.247	41	A	46.753	36	TAACCTTAACTTCACCAACA	TGGTGGTTGGAGAAATTACT	TAACCTTAACTTCACCAACA	TGGTGGTTGGAGAAATTACT	A	124396
1133_C3	WT	MMS	XIV	642716	632111	SNP	1	A	2	A/T	54.9/45.1	39/32	71	A	54.93	39	T	45.07	32	ATTATGAAGCAGAGGCTACC	CTGGGGGAGTTTTCCAGCTC	ATTATGAAGCAGAGGCTACC	CTGGGGGAGTTTTCCAGCTC	T
1133_C3	WT	MMS	XIV	712165	701560	SNP	1	G	2	G/C	51.8/48.2	29/27	56	G	51.786	29	C	48.214	27	AAATGATCTGGATCCAAACT	TGACCCTTTAAGGACGGTAG	AAATGATCTGGATCCAAACT	TGACCCTTTAAGGACGGTAG	C	69449
1133_C3	WT	MMS	XV	444692	441328	SNP	1	C	2	C/T	50.8/49.2	30/29	59	C	50.847	30	T	49.153	29	TACAACAATCAATCATGTCT	ACAGAAAGTACGAAGCACCA	TACAACAATCAATCATGTCT	ACAGAAAGTACGAAGCACCA	T
1133_C3	WT	MMS	XV	509613	506249	SNP	1	T	2	T/A	54.0/46.0	34/29	63	T	53.968	34	A	46.032	29	TTTCCGAATGTAAATAATGG	GTACCTTCAGCTTGCTTATC	TTTCCGAATGTAAATAATGG	GTACCTTCAGCTTGCTTATC	A	64921
1133_C3	WT	MMS	XV	511393	508029	SNP	1	C	2	C/T	54.5/45.5	48/40	88	C	54.545	48	T	45.455	40	GAACCATTGATCACGTGCAA	GACAAACCCTAAATATAAAA	GAACCATTGATCACGTGCAA	GACAAACCCTAAATATAAAA	T	1780
1133_C3	WT	MMS	XV	767394	758675	SNP	1	G	2	G/T	53.5/46.5	38/33	71	G	53.521	38	T	46.479	33	TGTCTATTTCTTCTTGGCTT	TTCCAGTTGTTCACGATTCG	TGTCTATTTCTTCTTGGCTT	TTCCAGTTGTTCACGATTCG	T	256001
1133_C3	WT	MMS	XV	768987	760268	SNP	1	A	2	A/G	54.4/45.6	31/26	57	A	54.386	31	G	45.614	26	AGTATTCACTCTCTAACCAG	CCAGGTTCATTAGCAGTGTC	AGTATTCACTCTCTAACCAG	CCAGGTTCATTAGCAGTGTC	G	1593
1133_C3	WT	MMS	XVI	113320	100169	SNP	1	A	2	A/T	54.2/45.8	39/33	72	A	54.167	39	T	45.833	33	ACAAGAACGAATCTGCCACA	TTAATGAAATGATGAAGCAT	ACAAGAACGAATCTGCCACA	TTAATGAAATGATGAAGCAT	T
1133_C3	WT	MMS	XVI	226989	213829	SNP	1	A	2	A/G	52.5/47.5	42/38	80	A	52.5	42	G	47.5	38	AGCGTAACCCGTCTCTTGCC	ATACGTCTGGGAAGGATGCC	AGCGTAACCCGTCTCTTGCC	ATACGTCTGGGAAGGATGCC	G	113669
1133_C3	WT	MMS	XVI	310590	297430	SNP	1	G	2	A/G	51.3/48.8	41/39	80	A	51.25	41	G	48.75	39	TATAAGGGGAAGCTGGTCGA	TCCCCTAAGCATTTCAAAAT	TATAAGGGGAAGCTGGTCGA	TCCCCTAAGCATTTCAAAAT	A	83601
1133_C3	WT	MMS	I	63	63	DIP	1	T	1	-	45.2	70	155	-	45.161	70				ACCACACCCACACACACACA	TCCTAACACTACCCTAACAC	ACCACACCCACACACACACA	CCTACCAC-ACCCTAACACA	-
1133_C4	WT	MMS	II	73480	71352	SNP	1	G	2	T/G	53.0/47.0	35/31	66	T	53.03	35	G	46.97	31	TTCTTTTGCTTTGGCCAATG	AATTTGTAGCTTGTTCAAAT	TTCTTTTGCTTTGGCCAATG	AATTTGTAGCTTGTTCAAAT	T
1133_C4	WT	MMS	II	197535	195391	SNP	1	C	2	C/T	51.3/48.7	39/37	76	C	51.316	39	T	48.684	37	AAGGCACCGTGCTAATAACG	GGGGATCAGCGGTTCGATCC	AAGGCACCGTGCTAATAACG	GGGGATCAGCGGTTCGATCC	T	124055
1133_C4	WT	MMS	II	405864	397557	SNP	1	T	2	T/A	51.0/49.0	52/50	102	T	50.98	52	A	49.02	50	TTTCGTTATTTCATAAAACC	TCAACAAATAGTAGCTCGCG	TTTCGTTATTTCATAAAACC	TCAACAAATAGTAGCTCGCG	A	208329
1133_C4	WT	MMS	II	557459	548420	SNP	1	A	2	A/G	50.0/50.0	37/37	74	A	50	37	G	50	37	AGTAACACAACCAGATATAG	AAGGCTTTCCAGAATGGAGT	AGTAACACAACCAGATATAG	AAGGCTTTCCAGAATGGAGT	G	151595
1133_C4	WT	MMS	II	782755	773340	SNP	1	C	2	C/T	51.4/48.6	37/35	72	C	51.389	37	T	48.611	35	GAGGAAGATAGCATAGAGGA	GAGGGAAGCAGCAGTGGAGG	GAGGAAGATAGCATAGAGGA	GAGGGAAGCAGCAGTGGAGG	T	225296
1133_C4	WT	MMS	III	184915	179255	SNP	1	A	2	C/A	53.6/46.4	37/32	69	C	53.623	37	A	46.377	32	CGTATTCAACAGATTGAGTT	CCCAGGCGCTGTAAATCTAG	CGTATTCAACAGATTGAGTT	CCCAGGCGCTGTAAATCTAG	C
1133_C4	WT	MMS	IV	373064	366325	SNP	1	T	2	T/C	50.7/49.3	36/35	71	T	50.704	36	C	49.296	35	TAAAATCAGGCCAGTTAGAA	CTGTTCTTTGAATAGGCTTT	TAAAATCAGGCCAGTTAGAA	CTGTTCTTTGAATAGGCTTT	C
1133_C4	WT	MMS	IV	732109	710333	SNP	1	T	2	C/T	53.1/46.9	34/30	64	C	53.125	34	T	46.875	30	GAAGATACCGCCACCCGCTT	TGACGAAACTTTTAAAAAGT	GAAGATACCGCCACCCGCTT	TGACGAAACTTTTAAAAAGT	C	359045
1133_C4	WT	MMS	IV	845661	823885	SNP	1	G	2	G/C	50.7/49.3	37/36	73	G	50.685	37	C	49.315	36	TCTTCCATCCGTTTAAATAA	AATTACAATGTTAGAATTAC	TCTTCCATCCGTTTAAATAA	AATTACAATGTTAGAATTAC	C	113552
1133_C4	WT	MMS	IV	1520771	1481161	SNP	1	G	2	G/T	53.9/46.1	48/41	89	G	53.933	48	T	46.067	41	GTTGAACGGATTAAATAAGG	AGTACAGGTATGCTTATATA	GTTGAACGGATTAAATAAGG	AGTACAGGTATGCTTATATA	T	675110
1133_C4	WT	MMS	V	521265	512731	SNP	1	G	2	A/G	52.4/47.6	44/40	84	A	52.381	44	G	47.619	40	TTCATTGTAATTTTGGAAAA	TAATTCAATTTTTTTAGTTT	TTCATTGTAATTTTGGAAAA	TAATTCAATTTTTTTAGTTT	A
1133_C4	WT	MMS	V	553678	545144	SNP	1	T	2	T/A	51.5/48.5	53/50	103	T	51.456	53	A	48.544	50	ACTACTCATTCGATGGAATA	TAAATGTGGATGATGATCTT	ACTACTCATTCGATGGAATA	TAAATGTGGATGATGATCTT	A	32413
1133_C4	WT	MMS	V	568916	560382	SNP	1	G	2	A/G	51.9/48.1	42/39	81	A	51.852	42	G	48.148	39	TAAGAAACCCTAGTTTCTAT	CACAAAAGTAGAACCCTATA	TAAGAAACCCTAGTTTCTAT	CACAAAAGTAGAACCCTATA	A	15238
1133_C4	WT	MMS	VI	68940	68541	SNP	1	T	2	T/A	54.7/45.3	35/29	64	T	54.688	35	A	45.312	29	CTCTAACAAAGGAGAATATA	ATACGTACATATATATATAT	CTCTAACAAAGGAGAATATA	ATACGTACATATATATATAT	A
1133_C4	WT	MMS	VII	7776	1465	SNP	1	G	2	G/A	54.8/45.2	46/38	84	G	54.762	46	A	45.238	38	AGTTGATGAAAATTTACCAC	TCAACTATTTATGTCCTTTC	AGTTGATGAAAATTTACCAC	TCAACTATTTATGTCCTTTC	A
1133_C4	WT	MMS	VII	119060	112597	SNP	1	C	2	G/C	53.0/47.0	35/31	66	G	53.03	35	C	46.97	31	ATTGTATAATCACCTCCTTC	TCATCTCTCACAACCGCAGC	ATTGTATAATCACCTCCTTC	TCATCTCTCACAACCGCAGC	G	111284
1133_C4	WT	MMS	VII	122274	115811	SNP	1	G	2	T/G	50.7/49.3	38/37	75	T	50.667	38	G	49.333	37	TTTTCCAACGAATTAGCCTT	TTGGCGCAATCGGTAGCGCG	TTTTCCAACGAATTAGCCTT	TTGGCGCAATCGGTAGCGCG	T	3214
1133_C4	WT	MMS	VII	152309	145846	SNP	1	T	2	C/T	54.4/45.6	37/31	68	C	54.412	37	T	45.588	31	AACCACCATCCGAACAGGTA	CTAGCTGTTACCATCTGTCT	AACCACCATCCGAACAGGTA	CTAGCTGTTACCATCTGTCT	C	30035
1133_C4	WT	MMS	VII	238374	231911	SNP	1	A	2	A/G	51.6/48.4	33/31	64	A	51.562	33	G	48.438	31	TGTTAAACTTCACCGGTCAA	CAAGGAGAAGAAATGTCAAT	TGTTAAACTTCACCGGTCAA	CAAGGAGAAGAAATGTCAAT	G	86065
1133_C4	WT	MMS	VII	244022	237559	SNP	1	T	2	A/T	54.2/45.8	39/33	72	A	54.167	39	T	45.833	33	TTCTTTGTTCTTTGGCAGTG	CAAAGCTGCGACATCATCAG	TTCTTTGTTCTTTGGCAGTG	CAAAGCTGCGACATCATCAG	A	5648
1133_C4	WT	MMS	VII	333094	326623	SNP	1	C	2	C/T	54.1/45.9	33/28	61	C	54.098	33	T	45.902	28	TATATCGCTGGTTTCTAAAC	GCTTGTTATCTGTTTCCTTA	TATATCGCTGGTTTCTAAAC	GCTTGTTATCTGTTTCCTTA	T	89072
1133_C4	WT	MMS	VIII	175784	169610	SNP	1	C	2	C/T	54.4/45.6	43/36	79	C	54.43	43	T	45.57	36	GTGCAAGCGATTGCCGCTGT	GGACAAGGCCGTCTCATCGC	GTGCAAGCGATTGCCGCTGT	GGACAAGGCCGTCTCATCGC	T
1133_C4	WT	MMS	VIII	211845	205671	SNP	1	T	2	T/C	51.3/48.7	40/38	78	T	51.282	40	C	48.718	38	GTCTACCTTCAACAAGGGTT	GATGGAAATCGCCAATCCTT	GTCTACCTTCAACAAGGGTT	GATGGAAATCGCCAATCCTT	C	36061
1133_C4	WT	MMS	VIII	228006	219989	SNP	1	G	2	C/G	54.2/45.8	39/33	72	C	54.167	39	G	45.833	33	AGCGCAGTGGCACTAAACTC	AGCAAATTACATAATCCTGA	AGCGCAGTGGCACTAAACTC	AGCAAATTACATAATCCTGA	C	16161
1133_C4	WT	MMS	IX	103274	86469	SNP	1	G	2	A/G	52.6/47.4	40/36	76	A	52.632	40	G	47.368	36	TCTTTCACAATTTTAAGAGG	ACTCGCAGTCGTTTTTAGAT	TCTTTCACAATTTTAAGAGG	ACTCGCAGTCGTTTTTAGAT	A
1133_C4	WT	MMS	X	279354	265282	SNP	1	C	2	C/T	53.0/47.0	35/31	66	C	53.03	35	T	46.97	31	AATTGAACAGAATGAGGATA	CTCCGCCGTCATATGATAAT	AATTGAACAGAATGAGGATA	CTCCGCCGTCATATGATAAT	T
1133_C4	WT	MMS	XIII	222694	208517	SNP	1	A	2	A/G	51.5/48.5	35/33	68	A	51.471	35	G	48.529	33	TAATTACCTTACGTTTTTTA	AAGACTTCTATAACACCTCT	TAATTACCTTACGTTTTTTA	AAGACTTCTATAACACCTCT	G
1133_C4	WT	MMS	XIII	236383	222204	SNP	1	C	2	C/T	50.0/50.0	35/35	70	C	50	35	T	50	35	TCAAATACGAGCTAACCCTA	TGATTTCAATTAGGTCTAAT	TCAAATACGAGCTAACCCTA	TGATTTCAATTAGGTCTAAT	T	13689
1133_C4	WT	MMS	XIV	205753	195818	SNP	1	T	2	C/T	52.9/47.1	36/32	68	C	52.941	36	T	47.059	32	TTTGGCACCTGTTGCGCTCT	TGGGTTTTGTAGAGAGGCAC	TTTGGCACCTGTTGCGCTCT	TGGGTTTTGTAGAGAGGCAC	C
1133_C4	WT	MMS	XIV	250781	240850	SNP	1	T	2	C/T	53.3/46.7	40/35	75	C	53.333	40	T	46.667	35	GATGCAGAATATATATCTGG	TTTGTAGTTCTATCCGCTAA	GATGCAGAATATATATCTGG	TTTGTAGTTCTATCCGCTAA	C	45028
1133_C4	WT	MMS	XIV	726195	715326	SNP	1	T	2	T/A	54.4/45.6	37/31	68	T	54.412	37	A	45.588	31	CAGATCTTAAGTCTGCCGCC	TAGACCACTCGGCCAACCCT	CAGATCTTAAGTCTGCCGCC	TAGACCACTCGGCCAACCCT	A	475414
1133_C4	WT	MMS	XV	387065	383689	SNP	1	A	2	A/T	52.4/47.6	43/39	82	A	52.439	43	T	47.561	39	TGATAGATGATAAACTACTA	ATAAATATGAAAACTCATGC	TGATAGATGATAAACTACTA	ATAAATATGAAAACTCATGC	T
1133_C4	WT	MMS	XV	623795	616005	SNP	1	A	2	A/T	50.0/50.0	31/31	62	A	50	31	T	50	31	CAACGCGTCTGCAGCTGGCC	GTTGCATGAAAGGGGTGCTT	CAACGCGTCTGCAGCTGGCC	GTTGCATGAAAGGGGTGCTT	T	236730
1133_C4	WT	MMS	XVI	772366	755673	SNP	1	C	2	A/C	53.8/46.2	35/30	65	A	53.846	35	C	46.154	30	GATATATTCGAATATCTCCA	CAACTAGAGGTCATTACTCT	GATATATTCGAATATCTCCA	CAACTAGAGGTCATTACTCT	A
1133_C5	WT	MMS	II	314606	305689	SNP	1	T	2	A/T	50.6/49.4	44/43	87	A	50.575	44	T	49.425	43	CCACAAGATACTGACAATGG	TATTTGATATTCATTTTATG	CCACAAGATACTGACAATGG	TATTTGATATTCATTTTATG	A
1133_C5	WT	MMS	II	327110	318193	SNP	1	T	2	C/T	53.9/46.1	55/47	102	C	53.922	55	T	46.078	47	TCGTCCATCAACTATAGTTA	ACTACTGGTATTATCATATA	TCGTCCATCAACTATAGTTA	ACTACTGGTATTATCATATA	C	12504
1133_C5	WT	MMS	II	559269	549619	SNP	1	A	2	A/G	53.7/46.3	36/31	67	A	53.731	36	G	46.269	31	GTGGAAACTGTGAAAGCTGA	AACAAGAAGTCGGGTACTCG	GTGGAAACTGTGAAAGCTGA	AACAAGAAGTCGGGTACTCG	G	232159
1133_C5	WT	MMS	III	206250	200165	SNP	1	A	2	T/A	53.5/46.5	46/40	86	T	53.488	46	A	46.512	40	AGTAATAAGTCGTCCTGAGA	CGATGTAGATTTAGATCTTT	AGTAATAAGTCGTCCTGAGA	CGATGTAGATTTAGATCTTT	T
1133_C5	WT	MMS	IV	196850	190242	SNP	1	G	2	C/G	54.3/45.7	38/32	70	C	54.286	38	G	45.714	32	TCTTGTAACTTTGTTTTCGA	AGAGCGAACTTCAACAGATT	TCTTGTAACTTTGTTTTCGA	GGAGCGAACTTCAACAGATT	C
1133_C5	WT	MMS	IV	1312990	1274129	SNP	1	G	2	G/A	53.7/46.3	44/38	82	G	53.659	44	A	46.341	38	AAATTATGGGTGTATTGCCA	AAGCTTATATCTCAAACAAT	AAATTATGGGTGTATTGCCA	AAGCTTATATCTCAAACAAT	A	1116140
1133_C5	WT	MMS	IV	1327262	1288401	SNP	1	T	2	G/T	50.6/49.4	39/38	77	G	50.649	39	T	49.351	38	GATAATTCCAATTGTTCAAT	ATGGCATCGATACGCTTGCG	GATAATTCCAATTGTTCAAT	ATGGCATCGATACGCTTGCG	G	14272
1133_C5	WT	MMS	IV	1400546	1361685	SNP	1	T	2	C/T	50.6/49.4	43/42	85	C	50.588	43	T	49.412	42	ATTGTATGTAGGGACTGTGG	GCAATAGTCAAGGATATATC	ATTGTATGTAGGGACTGTGG	GCAATAGTCAAGGATATATC	C	73284
1133_C5	WT	MMS	V	8431	8431	SNP	1	G	2	A/G	52.3/47.7	56/51	107	A	52.336	56	G	47.664	51	CTGGCGCGATGCAATACACT	GAAAAAATTAATAATAGTTA	CTGGCGCGATGCAATACACT	GAAAAAATTAATAATAGTTA	A
1133_C5	WT	MMS	V	357479	357470	SNP	1	A	2	G/A	52.9/47.1	45/40	85	G	52.941	45	A	47.059	40	AAGAAACACAGGCTGATAAG	CCGAAAATCAAAATGAAAAT	AAGAAACACAGGCTGATAAG	CCGAAAATCAAAATGAAAAT	G	349048
1133_C5	WT	MMS	VI	266281	260999	SNP	1	T	2	C/T	52.3/47.7	56/51	107	C	52.336	56	T	47.664	51	ACGCTAATACTCGTTTTTTT	CAACTACAAAACAACTAGTT	ACGCTAATACTCGTTTTTTT	CAACTACAAAACAACTAGTT	C
1133_C5	WT	MMS	VII	365163	358701	SNP	1	A	2	T/A	53.1/46.9	43/38	81	T	53.086	43	A	46.914	38	CTTTCTATTTCTTTTCTTAT	ATCAGTCGAAAGATGGTGAT	CTTTCTATTTCTTTTCTTAT	ATCAGTCGAAAGATGGTGAT	T
1133_C5	WT	MMS	VIII	212052	205968	SNP	1	G	2	A/G	54.1/45.9	40/34	74	A	54.054	40	G	45.946	34	ATTTGAATTTCATAGAGTGC	GTGCATATGTATATATCTAT	ATTTGAATTTCATAGAGTGC	GTGCATATGTATATATCTAT	A
1133_C5	WT	MMS	VIII	344450	336457	SNP	1	T	2	T/C	52.3/47.7	45/41	86	T	52.326	45	C	47.674	41	CTAAATATAATTTCATCGTA	CTGATGCCATCAAAATCATC	CTAAATATAATTTCATCGTA	CTGATGCCATCAAAATCATC	C	132398
1133_C5	WT	MMS	X	369349	354967	SNP	1	C	2	T/C	50.6/49.4	42/41	83	T	50.602	42	C	49.398	41	AACGTATTATTAAGAGCAGT	TTGTAGTTTTCATCAGTGAA	AACGTATTATTAAGAGCAGT	TTGTAGTTTTCATCAGTGAA	T
1133_C5	WT	MMS	XI	413947	413954	SNP	1	A	2	A/G	53.8/46.2	50/43	93	A	53.763	50	G	46.237	43	CAAACTTTGTTTTCTTCAAA	AATTTAGCCAAAGAGATGTT	CAAACTTTGTTTTCTTCAAA	AATTTAGCCAAAGAGATGTT	G
1133_C5	WT	MMS	XI	492856	492844	SNP	1	A	2	T/A	50.6/49.4	45/44	89	T	50.562	45	A	49.438	44	TTGTGGACCACAGAGTGACA	TCTCATAAACTTTGTATCTC	TTGTGGACCACAGAGTGACA	TCTCATAAACTTTGTATCTC	T	78909
1133_C5	WT	MMS	XII	283244	272298	SNP	1	C	2	C/G	52.7/47.3	39/35	74	C	52.703	39	G	47.297	35	AACAAGATGTTGTCTTGTGC	GGTGCGGATAGATTGCAACA	AACAAGATGTTGTCTTGTGC	GGTGCGGATAGATTGCAACA	G
1133_C5	WT	MMS	XII	921226	869836	SNP	1	G	2	C/G	52.6/47.4	40/36	76	C	52.632	40	G	47.368	36	GTTCCTTTGGAACCTCCATC	GAAGTTCTTGTTTTGAGTTT	GTTCCTTTGGAACCTCCATC	GAAGTTCTTGTTTTGAGTTT	C	637982
1133_C5	WT	MMS	XIII	129178	124156	SNP	1	T	2	G/T	53.0/47.0	44/39	83	G	53.012	44	T	46.988	39	ATCAGAAACTGAATTTGAGG	CTTTGTGTCATTTGCGTCAT	ATCAGAAACTGAATTTGAGG	CTTTGTGTCATTTGCGTCAT	G
1133_C5	WT	MMS	XIV	361960	352330	SNP	1	C	2	C/T	53.8/46.3	43/37	80	C	53.75	43	T	46.25	37	TGGGTGGATCATTTTGAAGT	TTTGCGACTTATTAAGCTCT	TGGGTGGATCATTTTGAAGT	TTTGCGACTTATTAAGCTCT	T
1133_C5	WT	MMS	XIV	516709	507065	SNP	1	A	2	T/A	52.9/47.1	37/33	70	T	52.857	37	A	47.143	33	ACGGGATAAAGTTTTTCTTA	CCATCTCTGCCGATGTTTCT	ACGGGATAAAGTTTTTCTTA	CCATCTCTGCCGATGTTTCT	T	154749
1133_C5	WT	MMS	XV	53219	53181	SNP	1	A	2	T/A	54.8/45.2	46/38	84	T	54.762	46	A	45.238	38	TTGCCAAGATTTTCAGTTTG	AAAACACAACCACTTTGCAT	TTGCCAAGATTTTCAGTTTG	AAAACACAACCACTTTGCAT	T
1133_C5	WT	MMS	XV	268172	264818	SNP	1	C	2	A/C	54.2/45.8	45/38	83	A	54.217	45	C	45.783	38	TATATCACTCGCTACACACA	AGCTCTAAATAGCTATGTTA	TATATCACTCGCTACACACA	AGCTCTAAATAGCTATGTTA	A	214953
1133_C5	WT	MMS	XV	444812	441458	SNP	1	C	2	C/T	50.6/49.4	45/44	89	C	50.562	45	T	49.438	44	ACAGATCCAAGCCAGTTGCT	TAACTTCCTTCTTGGGTTAC	ACAGATCCAAGCCAGTTGCT	TAACTTCCTTCTTGGGTTAC	T	176640
1133_C5	WT	MMS	XV	621906	614156	SNP	1	G	2	T/G	50.5/49.5	52/51	103	T	50.485	52	G	49.515	51	TTTGCTATTCCTAAGAAGAA	ATCCTACGTTGGTCTAAATG	TTTGCTATTCCTAAGAAGAA	ATCCTACGTTGGTCTAAATG	T	177094
1133_C5	WT	MMS	XV	889079	880325	SNP	1	G	2	T/G	54.4/45.6	31/26	57	T	54.386	31	G	45.614	26	ATCCTGCAATTCAAGCATAT	TGAAACAAAATGCTGCTGTC	ATCCTGCAATTCAAGCATAT	TGAAACAAAATGCTGCTGTC	T	267173
1133_C5	WT	MMS	XVI	314035	301227	SNP	1	T	2	A/T	53.8/46.2	35/30	65	A	53.846	35	T	46.154	30	CTTTCCAGTTTACAAGTTTC	TACCTAGCTTTGAAAGTGCT	CTTTCCAGTTTACAAGTTTC	TACCTAGCTTTGAAAGTGCT	A
1133_C5	WT	MMS	XVI	431405	418596	SNP	1	T	2	T/A	54.7/45.3	41/34	75	T	54.667	41	A	45.333	34	TCTTCTCATGTATCTACGTA	CTATGTGTGTATGTAAATGT	TCTTCTCATGTATCTACGTA	CTATGTGTGTATGTAAATGT	A	117370
1133_C5	WT	MMS	XVI	735724	718917	SNP	1	T	2	C/T	54.4/45.6	56/47	103	C	54.369	56	T	45.631	47	GCGGTTGTCCCACTAATTCA	GCTGCTGAAACATTATTGGC	GCGGTTGTCCCACTAATTCA	GCTGCTGAAACATTATTGGC	C	304319
1133_C5	WT	MMS	XVI	909818	882263	SNP	1	T	2	T/A	54.4/45.6	49/41	90	T	54.444	49	A	45.556	41	CTAGCGTTTTATTTTCTTCC	TTTTCCTGTAATATTTTTAA	CTAGCGTTTTATTTTCTTCC	TTTCCTGTAATATTTTTAAC	A	174094
1133_C5	WT	MMS	XVI	937242	909687	SNP	1	A	2	T/A	52.9/47.1	46/41	87	T	52.874	46	A	47.126	41	CTTTCCATTAATCATTAGTA	TTAAAAATTTCTTAACTTCT	CTTTCCATTAATCATTAGTA	TTAAAAATTTCTTAACTTCT	T	27424
1133_C5	WT	MMS	I	31484	30557	DIP	2	CA	2	CA/--	52.5/44.3	32/27	61	CA	52.459	32	--	44.262	27	ATAAAGGTACATACATAGGC	CACACACACACACACACACA	ATAAAGGTACATACATAGGC	CACACACACACACACACACA	--
1133_C5	WT	MMS	XVI	674419	657612	DIP	1	T	2	T/-	50.5/49.5	46/45	91	T	50.549	46	-	49.451	45	ATTCCTGCATGGAAACTTTG	ATTTTTGGAGCATTGTCTGG	ATTCCTGCATGGAAACTTTG	ATTTTTGGAGCATTGTCTGG	-
1133_C6	WT	MMS	II	47219	44877	SNP	1	T	2	T/C	50.7/49.3	35/34	69	T	50.725	35	C	49.275	34	AGTGCTTATATTATCTGTCG	CATACCACTGTTTGAGACCC	AGTGCTTATATTATCTGTCG	CATACCACTGTTTGAGACCC	C
1133_C6	WT	MMS	II	144334	141987	SNP	1	T	2	A/T	54.5/45.5	42/35	77	A	54.545	42	T	45.455	35	TGACTCCATTCAGTTTCATT	TGGAAAAATGTTGGTCTCAA	TGACTCCATTCAGTTTCATT	TGGAAAAATGTTGGTCTCAA	A	97115
1133_C6	WT	MMS	II	187752	185394	SNP	1	C	2	C/T	53.9/46.1	41/35	76	C	53.947	41	T	46.053	35	ATCGGTTTTACGTAAAAACT	GGTTTGGTGACCAAATAGGC	ATCGGTTTTACGCAAAAACT	GGTTTGGTGACCAAATAGGC	T	43418
1133_C6	WT	MMS	II	200818	198458	SNP	1	C	2	T/C	51.1/48.9	45/43	88	T	51.136	45	C	48.864	43	GATTGCGAATTGTTGTAAGT	CCAAGGATTGAATGCAAAAT	GATTGCGAATTGTTGTAAGT	CCAAGGATTGAATGCAAAAT	T	13066
1133_C6	WT	MMS	II	743083	732691	SNP	1	C	2	C/A	52.9/47.1	37/33	70	C	52.857	37	A	47.143	33	AGTTACTATTTTTTTGGAAG	TTTTCTCGAAGGGCAGTAAC	AGTTACTATTTTTTTGGAAG	TTTTCTCGAAGGGCAGTAAC	A	542265
1133_C6	WT	MMS	IV	230057	222974	SNP	1	A	2	T/A	50.6/49.4	39/38	77	T	50.649	39	A	49.351	38	ACCTAAAACGACTTTGTGTG	CTACGAAGAGAAAGATTAGA	ACCTAAAACGACTTTGTGTG	CTACGAAGAGAAAGATTAGA	T
1133_C6	WT	MMS	IV	858955	837391	SNP	1	T	2	C/T	50.0/50.0	30/30	60	C	50	30	T	50	30	CCTTGGGCTGTCAGAACAGG	TTAAGCTGCAAGCCATTGAT	CCTTGGGCTGTCAGAACAGG	TTAAGCTGCAAGCCATTGAT	C	628898
1133_C6	WT	MMS	IV	917290	894035	SNP	1	A	2	A/T	50.0/50.0	27/27	54	A	50	27	T	50	27	ATAAGTGTTTGTAACTGGCT	TAACGTCCTTAAACATGTGC	ATAAGTGTTTGTAACTGGCT	TAACGTCCTTAAACATGTGC	T	58335
1133_C6	WT	MMS	IV	975651	952396	SNP	1	T	2	T/C	50.7/49.3	35/34	69	T	50.725	35	C	49.275	34	TTTATTCTATAAGGTAACTT	TGGGACGTGCTGGGCTGTGC	TTTATTCTATAAGGTAACTT	TGGGACGTGCTGGGCTGTGC	C	58361
1133_C6	WT	MMS	IV	1047861	1020568	SNP	1	T	2	A/T	51.9/48.1	40/37	77	A	51.948	40	T	48.052	37	CTTCAACATCGTCATTTTTC	TTTGAGTTGGACGTTGTTTC	CTTCAACATCGTCATTTTTC	TTTGAGTTGGACGTTGTTTC	A	72210
1133_C6	WT	MMS	V	37025	37025	SNP	1	A	2	A/C	52.1/47.9	37/34	71	A	52.113	37	C	47.887	34	TTTGCGATAGCGTCGCTGCC	TGCTATTATAGAATTCGTTA	TTTGCGATAGCGTCGCTGCC	TGCTATTATAGAATTCGTTA	C
1133_C6	WT	MMS	VII	35014	28563	SNP	1	T	2	T/C	53.7/46.3	36/31	67	T	53.731	36	C	46.269	31	TGGGCCTTTTCATATAACGA	GAGAAAGAAAAAAATATTGC	TGGGCCTTTTCATATAACGA	GAGAAAGAAAAAAATATTGC	C
1133_C6	WT	MMS	VII	73917	67468	SNP	1	T	2	T/A	52.0/48.0	39/36	75	T	52	39	A	48	36	GAAACCACTTAATTGAAATA	ACAACCCCAAGATAAGATAC	GAAACCACTTAATTGAAATA	ACAACCCCAAGATAAGATAC	A	38903
1133_C6	WT	MMS	VII	648979	633252	SNP	1	G	2	A/G	51.4/48.6	37/35	72	A	51.389	37	G	48.611	35	AACGTTATAATACACGAAAT	AATGCCTCTCTTAACAGTAT	AACGTTATAATACACGAAAT	AATGCCTCTCTTAACAGTAT	A	575062
1133_C6	WT	MMS	VII	790863	774272	SNP	1	T	2	C/T	50.0/50.0	26/26	52	C	50	26	T	50	26	GTCCATCATGATTTTGTGCC	CAAACATGTAATATACCATA	GTCCATCATGATTTTGTGCC	CAAACATGTAATATACCATA	C	141884
1133_C6	WT	MMS	VIII	418033	409863	SNP	1	T	2	C/T	54.8/45.2	34/28	62	C	54.839	34	T	45.161	28	AAATGGGAGTTCGCAGTCGG	TAATAGTATGATAGCGACCA	AAATGGGAGTTCGCAGTCGG	TAATAGTATGATAGCGACCA	C
1133_C6	WT	MMS	X	18479	4507	SNP	1	T	2	T/C	52.2/47.8	2018-12-11	23	T	52.174	12	C	47.826	11	TGCGGGATAAATTTGATAAA	TGTGGCCTCTTTCCACCACT	TGCGGGATAAATTTGATAAA	TGTGGCCTCTTTCCACCACT	C
1133_C6	WT	MMS	X	354194	340222	SNP	1	T	2	A/T	50.0/50.0	34/34	68	A	50	34	T	50	34	TCTTATGAAACAATACTTTC	TTGAATTTGTATGATGAAAC	TCTTATGAAACAATACTTTC	TTGAATTTGTATGATGAAAC	A	335715
1133_C6	WT	MMS	X	422067	407668	SNP	1	G	2	A/G	50.7/49.3	35/34	69	A	50.725	35	G	49.275	34	TTCAAGAAGCAGTTCAGACA	TACCGAAGCAGAATTAAAAA	TTCAAGAAGCAGTTCAGACA	TACCGAAGCAGAATTAAAAA	A	67873
1133_C6	WT	MMS	X	429564	415165	SNP	1	A	2	T/A	54.9/45.1	39/32	71	T	54.93	39	A	45.07	32	TTTCATATGCAGACTTGCTA	GTGGCGCTTGCTCTACTGTG	TTTCATATGCAGACTTGCTA	GTGGCGCTTGCTCTACTGTG	T	7497
1133_C6	WT	MMS	X	519344	499163	SNP	1	G	2	G/A	50.8/49.2	30/29	59	G	50.847	30	A	49.153	29	TCTTTTTTTCTCAGTTTTTC	TAAAGTGGAGTGAAAGCCCA	TCTTTTTTTCTCAGTTTTTC	TAAAGTGGAGTGAAAGCCCA	A	89780
1133_C6	WT	MMS	X	637438	617256	SNP	1	C	2	G/C	52.5/47.5	32/29	61	G	52.459	32	C	47.541	29	CCATACACGAGATAGACGAG	GGCTTGCGAAAGTGAATGAG	CCATACACGAGATAGACGAG	GGCTTGCGAAAGTGAATGAG	G	118094
1133_C6	WT	MMS	XI	581456	581230	SNP	1	C	2	A/C	52.3/47.7	45/41	86	A	52.326	45	C	47.674	41	GAAGGATACTACGTGGGGTT	AAAACCGTGAATACGTTGTC	GAAGGATACTACGTGGGGTT	AAAACCGTGAATACGTTGTC	A
1133_C6	WT	MMS	XII	95683	88333	SNP	1	G	2	G/A	52.9/47.1	27/24	51	G	52.941	27	A	47.059	24	GCTTGGTACAATTTAGACAT	ATTGGGTTGGCAACCTCTTG	GCTTGGTACAATTTAGACAT	ATTGGGTTGGCAACCTCTTG	A
1133_C6	WT	MMS	XIII	416208	397922	SNP	1	G	2	A/G	50.0/50.0	33/33	66	A	50	33	G	50	33	TTTCCCTTCTAAGTCATCTC	ATGTCATCATCTTCATCGTC	TTTCCCTTCTAAGTCATCTC	ATGTCATCATCTTCATCGTC	A
1133_C6	WT	MMS	XIII	472768	454482	SNP	1	C	2	C/A	54.4/45.6	31/26	57	C	54.386	31	A	45.614	26	TACTTTTTCGGCATACATAT	TATTTATATATAGTTTAATA	TACTTTTTCGGCATACATAT	TATTTATATATAGTTTAATA	A	56560
1133_C6	WT	MMS	XIV	560690	551225	SNP	1	T	2	T/A	50.6/49.4	39/38	77	T	50.649	39	A	49.351	38	TAGGAATGATGGAAAAAAAA	TATGCTTCCAATCGGATTTG	TAGGAATGATGGAAAAAAAA	TATGCTTCCAATCGGATTTG	A
1133_C6	WT	MMS	XV	615173	607349	SNP	1	G	2	G/T	53.5/46.5	38/33	71	G	53.521	38	T	46.479	33	TACCATCACGACCAATAGGG	TATTTGTTCTTCTTAAATGT	TACCATCACGACCAATAGGG	TATTTGTTCTTCTTAAATGT	T
1133_C6	WT	MMS	XVI	128290	115423	SNP	1	G	2	A/G	52.6/47.4	40/36	76	A	52.632	40	G	47.368	36	CACTTTACCCGCTAATTCCA	GAGGTTTGAGTTAGACAACG	CACTTTACCCGCTAATTCCA	GAGGTTTGAGTTAGACAACG	A
1133_C6	WT	MMS	XVI	241991	229124	SNP	1	A	2	G/A	54.3/45.7	44/37	81	G	54.321	44	A	45.679	37	TTATAGTAACGTATTTAACA	CAGGCTCCGCCGTAGTAGTA	TTATAGTAACGTATTTAACA	CAGGCTCCGCCGTAGTAGTA	G	113701
1133_C6	WT	MMS	XVI	774387	757747	SNP	1	C	2	G/C	53.9/46.1	41/35	76	G	53.947	41	C	46.053	35	CGCGCCGTCAGTGATATAAG	GTATTCAGCTAGTTTGGGCA	CGCGCCGTCAGTGATATAAG	GTATTCAGCTAGTTTGGGCA	G	532396
1133_C6	WT	MMS	II	5876	3886	DIP	4	TTTC	2	TTTC/----	46.0/39.1	40/34	87	TTTC	45.977	40	----	39.08	34	ACTACCCTAACCCTACCCTA	AACCCTTCCAACCTGTCTCT	CTACCTCAACACCTTCCCTA	AACCCTTCCAACCTGTCTCT	----
1133_C6	WT	MMS	VII	790865	774274	DIP	1	-	2	-/A	52.7/47.3	29/26	55	-	52.727	29	A	47.273	26	CCATCATGATTTTGTGCCTC	AAACATGTAATATACCATAT	CCATCATGATTTTGTGCCCC	AACATGTAATATACCATATA	A
1133_C7	WT	MMS	I	206162	198124	SNP	1	A	2	A/T	53.3/46.7	2018-08-07	15	A	53.333	8	T	46.667	7	ACCGGTACTTTCACTTCTAC	TCTACTGAAATGACGCACGT	AATGGCACTTTCACTTCGAC	TCCACTGAAATGAC-CACCG	T
1133_C7	WT	MMS	II	217101	214981	SNP	1	T	2	A/T	54.2/45.8	32/27	59	A	54.237	32	T	45.763	27	CTGAAAGCCCTGCGAGTACG	CATAGTATCCCATATTACTT	CTGAAAGCCCTGCGAGTACG	CATAGTATCCCATATTACTT	A
1133_C7	WT	MMS	II	232924	230405	SNP	1	G	2	A/G	54.1/45.9	40/34	74	A	54.054	40	G	45.946	34	CTCGCCTCAAACATCAGCCT	ACAGAATTTGGAACATTACT	CTCGCCTCAAACATCAGCCT	ACAGAATTTGGAACATTACT	A	15823
1133_C7	WT	MMS	II	339051	330786	SNP	1	T	2	T/A	51.4/48.6	36/34	70	T	51.429	36	A	48.571	34	AAAGCCCACCAGTATTCGAG	CCCAAAAGCTTTTCCACTCC	AAAGCCCACCAGTATTCGAG	CCCAAAAGCTTTTCCACTCC	A	106127
1133_C7	WT	MMS	II	349836	341571	SNP	1	T	2	T/C	51.7/48.3	31/29	60	T	51.667	31	C	48.333	29	AGCAAGCCAGAGTCTCTTTT	AATCAGAGGAAAGATGAGTT	AGCAAGCCAGAGTCTCTTTT	AATCAGAGGAAAGATGAGTT	C	10785
1133_C7	WT	MMS	II	408994	400728	SNP	1	A	2	A/T	50.9/49.1	28/27	55	A	50.909	28	T	49.091	27	AAAAAGTAATTCCCCCGCAG	GGTATATATTAAGTTTGAAA	AAAAAGTAATTCCCCCGCAG	GGTATATATTAAGTTTGAAA	T	59158
1133_C7	WT	MMS	IV	302208	295273	SNP	1	A	2	G/A	52.5/47.5	31/28	59	G	52.542	31	A	47.458	28	TGGGTGAATTTGTCGATGAC	ATACACCTTTGGAGCACGTT	TGGGTGAATTTGTCGATGAC	ATACACCTTTGGAGCACGTT	G
1133_C7	WT	MMS	IV	847928	826770	SNP	1	T	2	A/T	53.1/46.9	34/30	64	A	53.125	34	T	46.875	30	AACAGGTGTGCGACCTTTTA	CAATATAGAGGTCAACATTT	AACAGGTGTGCGACCTTTTA	CAATATAGAGGTCAACATTT	A	545720
1133_C7	WT	MMS	IV	889289	866276	SNP	1	G	2	A/G	54.2/45.8	32/27	59	A	54.237	32	G	45.763	27	TTGCGCTTACTGCTAAGCCT	TTTCTAAACATGATCCCCAG	TTGCGCTTACTGCTAAGCCT	TTTCTAAACATGATCCCCAG	A	41361
1133_C7	WT	MMS	V	93683	93673	SNP	1	T	2	T/C	50.9/49.1	29/28	57	T	50.877	29	C	49.123	28	ATGTATTATGGTTTATTGGG	GTGACAGGTTTGGCACTTGC	ATGTATTATGGTTTATTGGG	GTGACAGGTTTGGCACTTGC	C
1133_C7	WT	MMS	VI	74741	74330	SNP	1	T	2	T/C	55.0/45.0	33/27	60	T	55	33	C	45	27	AAGTTAAAGCTCCCTCATTT	TAGTAAGGACGCTTTCTTTT	AAGTTAAAGCTCCCTCATTT	TAGTAAGGACGCTTTCTTTT	C
1133_C7	WT	MMS	VII	218633	212081	SNP	1	A	2	G/A	54.3/45.7	38/32	70	G	54.286	38	A	45.714	32	TCTAATTTGACTCTGTTAGA	AGAAAGTGGGTCATATTTAT	TCTAATTTGACTCTGTTAGA	AGAAAGTGGGTCATATTTAT	G
1133_C7	WT	MMS	VIII	35310	35314	SNP	1	C	2	C/G	55.0/45.0	44/36	80	C	55	44	G	45	36	TCTTGGCTTGAGCCTTGTTA	CAAGGATACCACCACCCCAG	TCTTGGCTTGAGCCTTGTTA	CAAGGATACCACCACCCCAG	G
1133_C7	WT	MMS	VIII	53934	53935	SNP	1	C	2	A/C	52.4/47.6	43/39	82	A	52.439	43	C	47.561	39	CCTCGCTAGCCCATGTAAGA	CCACCTGGATGAATAAACTT	CCTCGCTAGCCCATGTAAGA	CCACCTGGATGAATAAACTT	A	18624
1133_C7	WT	MMS	X	386473	372012	SNP	1	C	2	C/T	54.3/45.7	25/21	46	C	54.348	25	T	45.652	21	CTTCTTTCCGTTAGAGCTTC	TTTTCTTCCAGAATATCTTC	CTTCTTTCCGTTAGAGCTTC	TTTTCTTCCAGAATATCTTC	T
1133_C7	WT	MMS	X	560888	540772	SNP	1	G	2	G/T	51.9/48.1	27/25	52	G	51.923	27	T	48.077	25	TCCGACTATATGCAGGAAAC	TTTCAAATTCTGACTGAGAG	TCCGACTATATGCAGGAAAC	TTTCAAATTCTGACTGAGAG	T	174415
1133_C7	WT	MMS	XI	2008	2009	SNP	1	T	2	G/T	51.6/48.4	33/31	64	G	51.562	33	T	48.438	31	TAGGTCTCACTTGGATGAGC	GCTTGAAACAAGTAGTATTG	TAGGTCTCACTTGGATGAGC	GCTTGAAACAAGTAGTATTG	G		Complex
1133_C7	WT	MMS	XI	2014	2015	SNP	1	A	2	G/A	50.8/49.2	31/30	61	G	50.82	31	A	49.18	30	TCACTTGGATGAGCTGCTTG	AACAAGTAGTATTGGGCCAA	TCACTTGGATGAGCGGCTTG	AACAAGTAGTATTGGGCCAA	G	6	Complex
1133_C7	WT	MMS	XI	2019	2020	SNP	1	A	2	T/A	50.8/49.2	32/31	63	T	50.794	32	A	49.206	31	TGGATGAGCTGCTTGAAACA	GTAGTATTGGGCCAAATGAG	TGGATGAGCGGCTTGAAACA	GTAGTATTGGGCCAAATGAG	T	5	Complex
1133_C7	WT	MMS	XII	185021	177477	SNP	1	A	2	A/T	52.7/47.3	39/35	74	A	52.703	39	T	47.297	35	CTTAAGTTCGGCCTAGAAAA	TTTTTTCATGAACATTATTA	CTTAAGTTCGGCCTAGAAAA	TTTTTTCATGAACATTATTA	T
1133_C7	WT	MMS	XV	111029	110974	SNP	1	C	2	C/A	51.2/48.8	22/21	43	C	51.163	22	A	48.837	21	ATGATAACCACTACACTAAC	GCCCGGGTTAATTGTTATTA	ATGATAACCACTACACTAAC	GCCCGGGTTAATTGTTATTA	A
1133_C7	WT	MMS	XVI	694968	678102	SNP	1	T	2	T/A	54.8/45.2	34/28	62	T	54.839	34	A	45.161	28	CGGTGAGAACAAGAAATGAA	GAATCAAGAAGTCACGATCA	CGGTGAGAACAAGAAATGAA	GAATCAAGAAGTCACGATCA	A
1133_C7	WT	MMS	XVI	743396	726530	SNP	1	G	2	A/G	52.0/48.0	39/36	75	A	52	39	G	48	36	TTTTGGAAACATATGCAAAT	TTTTGATTCCATGTAAATAT	TTTTGGAAACATATGCAAAT	TTTTGATTCCATGTAAATAT	A	48428
1133_C7	WT	MMS	XVI	857092	829631	SNP	1	T	2	T/A	50.8/49.2	33/32	65	T	50.769	33	A	49.231	32	TTCCTCTCAGCCTGCAAGTG	GACGCGATCTGAAAGGCGTT	TTCCTCTCAGCCTGCAAGTG	GACGCGATCTGAAAGGCGTT	A	113696
1133_C7	WT	MMS	XII	837517	785036	DIP	2	AT	2	AT/--	50.0/41.7	24/20	48	AT	50	24	--	41.667	20	GTGTACACATACACGCACAC	ATATATATATATATATATAT	GTGTACACATACACGCACAC	ATATATATATATATATATGT	--
1133_C8	WT	MMS	II	595949	585356	SNP	1	T	2	A/T	52.3/47.7	56/51	107	A	52.336	56	T	47.664	51	TAAATAGAATTCGGGTAGCA	TTTATTTTTATCGCTTATAG	TAAATAGAATTCGGGTAGCA	TTTATTTTTATCGCTTATAG	A
1133_C8	WT	MMS	III	38517	37736	SNP	1	G	2	G/T	54.9/45.1	56/46	102	G	54.902	56	T	45.098	46	GTGTGTTCAGGGATTACAGG	AATTTGTTTAATAGCAATTT	GTGTGTTCAGGGATTACAGG	AATTTGTTTAATAGCAATTT	T
1133_C8	WT	MMS	IV	140832	134263	SNP	1	A	2	G/A	52.8/47.2	38/34	72	G	52.778	38	A	47.222	34	TTAGTGGGTGATTCGCCCAA	CCAGTGGTGGGCGCCATTGG	TTAGTGGGTGATTCGCCCAA	CCAGTGGTGGGCGCCATTGG	G
1133_C8	WT	MMS	IV	516111	508745	SNP	1	G	2	G/A	52.2/47.8	24/22	46	G	52.174	24	A	47.826	22	TGGACGAACGGTCATCTATT	AGGGCGTACTATTTGTAGTC	TGGACGAACGGTCATCTATT	AGGGCGTACTATTTGTAGTC	A	375279
1133_C8	WT	MMS	IV	1092035	1066111	SNP	1	A	2	A/G	50.0/50.0	27/27	54	A	50	27	G	50	27	GAACGGAACCATAAGACCAA	CCAAGCAAAAGGGTTCTTAA	GAACGGAACCATAAGACCAA	CCAAGCAAAAGGGTTCTTAA	G	575924
1133_C8	WT	MMS	V	570147	561630	SNP	1	G	1	C	48.1	100	208	C	48.077	100				GTAATGGTAGGGTAAGTGGT	GTGGAGTTGGATATGGGTAA	GTAATGGTAGGGTAAGTGGT	GTGGAGTTGGATATGGGTAA	C
1133_C8	WT	MMS	VI	13344	12966	SNP	1	T	2	T/C	51.9/48.1	41/38	79	T	51.899	41	C	48.101	38	GCCAGAAGACTACACCGCCG	CAGATGTGGTATGAATGTCG	GCCAGAAGACTACACCGCCG	CAGATGTGGTATGAATGTCG	C
1133_C8	WT	MMS	VII	269561	263054	SNP	1	G	2	T/G	50.6/49.4	41/40	81	T	50.617	41	G	49.383	40	AGATTTCATTAGCACTTAGC	TGATGAATACTTGATTGCGC	AGATTTCATTAGCACTTAGC	TGATGAATACTTGATTGCGC	T
1133_C8	WT	MMS	VII	379731	373203	SNP	1	G	2	G/A	53.6/46.4	45/39	84	G	53.571	45	A	46.429	39	GTAAATTATTTTTTCTTCGG	GGGTATACATTATTTATTTA	GTAAATTATTTTTTCTTCGG	GGGTATACATTATTTATTTA	A	110170
1133_C8	WT	MMS	VIII	366641	358547	SNP	1	G	2	G/T	55.0/45.0	44/36	80	G	55	44	T	45	36	TAATGACCTTGTTGATCCCA	GGTACTGTTATCACTGGATT	TAATGACCTTGTTGATCCCA	GGTACTGTTATCACTGGATT	T
1133_C8	WT	MMS	VIII	468174	460081	SNP	1	A	2	A/T	54.3/45.7	51/43	94	A	54.255	51	T	45.745	43	ATTAAGTATTGTCATTACAT	GACAAAGGCAAGAGAAAGAG	ATTAAGTATTGTCATTACAT	GACAAAGGCAAGAGAAAGAG	T	101533
1133_C8	WT	MMS	IX	383178	366727	SNP	1	C	2	A/C	50.6/49.4	42/41	83	A	50.602	42	C	49.398	41	TATGCCCAGAGACAAACATA	GCATTCAGTATGTCCCGCTA	TATGCCCAGAGACAAACATA	GCATTCAGTATGTCCCGCTA	A
1133_C8	WT	MMS	X	712148	692269	SNP	1	C	2	A/C	50.0/50.0	39/39	78	A	50	39	C	50	39	ATAGGAGTATGTTCACAAAC	GTAGTATTATGTGCTACATG	ATAGGAGTATGTTCACAAAC	GTAGTATTATGTGCTACATG	A
1133_C8	WT	MMS	XII	39932	32351	SNP	1	C	2	C/T	50.5/49.5	46/45	91	C	50.549	46	T	49.451	45	TAAGGCATCCTTGGAGGATG	ATAGACCATCTTAGATCTGA	TAAGGCATCCTTGGAGGATG	ATAGACCATCTTAGATCTGA	T
1133_C8	WT	MMS	XIII	579312	561731	SNP	1	T	2	T/C	54.5/45.5	48/40	88	T	54.545	48	C	45.455	40	TGAAAGTACTGGGATCTTTA	CCCACGTCCATCCTTGCCTC	TGAAAGTACTGGGATCTTTA	CCCACGTCCATCCTTGCCTC	C
1133_C8	WT	MMS	XIV	77	77	SNP	1	G	2	G/C	50.0/40.0	2018-05-04	10	G	50	5	C	40	4	CCCTACAGCACTTCTACATA	CCCTAAATAGCCCTAAATAG	CCCTACAGCACTTCTACATA	CCCTAAATAGCCCTCCATAG	C
1133_C8	WT	MMS	XV	871505	862702	SNP	1	A	2	T/A	51.9/48.1	40/37	77	T	51.948	40	A	48.052	37	CAATAAATATTTATGTTCAG	GGATAATCTGGATCCATCCG	CAATAAATATTTATGTTCAG	GGATAATCTGGATCCATCCG	T
1133_C8	WT	MMS	III	316511	310042	DIP	1	-	2	-/A	53.8/46.2	2018-07-06	13	-	53.846	7	A	46.154	6	TCAGGGTTAGAATAGGGTAG	TGTTAGGGTAGTGTGTGGGT	TCAGGGTTGGAGTAGGGTAG	GTTAGGGTAGTGTGTGGGTG	A
1133_C9	WT	MMS	I	31610	30629	SNP	1	T	2	T/C	54.8/45.2	34/28	62	T	54.839	34	C	45.161	28	GCAGGCTTACGATGAGATCG	TTCTTCTGTGGAGGATTCCA	GCAGGCTTACGATGAGATCG	TTCTTCTGTGGAGGATTCCA	C
1133_C9	WT	MMS	I	157962	156978	SNP	1	T	2	T/C	50.8/49.2	30/29	59	T	50.847	30	C	49.153	29	GAAGTTGACATTGAATAGTT	ACCATCACCTCTTTGATTGT	GAAGTTGACATTGAATAGTT	ACCATCACCTCTTTGATTGT	C	126352
1133_C9	WT	MMS	II	347643	338458	SNP	1	C	2	C/G	53.2/46.8	25/22	47	C	53.191	25	G	46.809	22	TAAGGCGGCAGACTTAAGAT	TGTTGGACGGTTGTCCGCGC	TAAGGCGGCAGACTTAAGAT	TGTTGGACGGTTGTCCGCGC	G
1133_C9	WT	MMS	III	170877	165265	SNP	1	C	2	C/A	52.6/47.4	30/27	57	C	52.632	30	A	47.368	27	CAATGAATAGCTAAAAGAAT	GAATGTATCTATCGGAAAGG	CAATGAATAGCTAAAAGAAT	GAATGTATCTATCGGAAAGG	A
1133_C9	WT	MMS	III	228254	221937	SNP	1	C	2	G/C	54.2/45.8	26/22	48	G	54.167	26	C	45.833	22	AAGAAAAATTTTCTTAGGGA	TCATCATCAATGTAAACACC	AAGAAAAATTTTCTTAGGGA	TCATCATCAATGTAAACACC	G	57377
1133_C9	WT	MMS	IV	306446	299732	SNP	1	G	2	G/C	52.9/47.1	36/32	68	G	52.941	36	C	47.059	32	CTGGTAGATTTGGTACTAAG	GTTTGGCTATTTCATTCGTT	CTGGTAGATTTGGTACTAAG	GTTTGGCTATTTCATTCGTT	C
1133_C9	WT	MMS	IV	317454	310740	SNP	1	G	2	G/T	54.5/45.5	36/30	66	G	54.545	36	T	45.455	30	TCGTATATGGAGACTAACTT	CTGTACAAGTACAATAGAAG	TCGTATATGGAGACTAACTT	CTGTACAAGTACAATAGAAG	T	11008
1133_C9	WT	MMS	IV	608533	593184	SNP	1	T	2	T/A	54.7/45.3	29/24	53	T	54.717	29	A	45.283	24	GTGGCTAGCTTGTGACATGC	TAAATGATTTTGATTATTAT	GTGGCTAGCTTGTGACATGC	TAAATGATTTTGATTATTAT	A	291079
1133_C9	WT	MMS	IV	629054	613705	SNP	1	A	2	G/A	54.4/45.6	31/26	57	G	54.386	31	A	45.614	26	ATACGAGGGCGTTTTACATG	CATCAAACTATTAGGAAAAT	ATACGAGGGCGTTTTACATG	CATCAAACTATTAGGAAAAT	G	20521
1133_C9	WT	MMS	IV	672082	651102	SNP	1	A	2	T/A	51.7/48.3	31/29	60	T	51.667	31	A	48.333	29	ATTCCCAAGAAGAATTCGAA	AATGCCAGGCGTTAGCTAAG	ATTCCCAAGAAGAATTCGAA	AATGCCAGGCGTTAGCTAAG	T	43028
1133_C9	WT	MMS	IV	1295420	1256228	SNP	1	G	2	G/T	54.8/45.2	23/19	42	G	54.762	23	T	45.238	19	ATGCAGTCGCATTATCGTCG	GCACCGCCTGGGGTTTCTTG	ATGCAGTCGCATTATCGTCG	GCACCGCCTGGGGTTTCTTG	T	623338
1133_C9	WT	MMS	VIII	248026	239730	SNP	1	A	2	A/G	52.9/47.1	37/33	70	A	52.857	37	G	47.143	33	GCGTGTTTGGTTACCTAAGA	AGGTTGAAAAATGTGGTCCT	GCGTGTTTGGTTACCTAAGA	AGGTTGAAAAATGTGGTCCT	G
1133_C9	WT	MMS	X	219631	205558	SNP	1	A	2	G/A	54.0/46.0	34/29	63	G	53.968	34	A	46.032	29	GGTTATTTATTATCTTCTTG	TGAACGTCTCATCGTCTCCA	GGTTATTTATTATCTTCTTG	TGAACGTCTCATCGTCTCCA	G
1133_C9	WT	MMS	X	354308	340236	SNP	1	G	2	A/G	54.8/45.2	23/19	42	A	54.762	23	G	45.238	19	CACTACGAAATCTTGAGATC	GGCGTTCGACTCGCCCCCGG	CACTACGAAATCTTGAGATC	GGCGTTCGACTCGCCCCCGG	A	134677
1133_C9	WT	MMS	X	410125	395526	SNP	1	C	2	A/C	51.4/48.6	38/36	74	A	51.351	38	C	48.649	36	ACCCAAATTGGTATTTGCTT	TAGCAATGATATTCGAAGGT	ACCCAAATTGGTATTTGCTT	TAGCAATGATATTCGAAGGT	A	55817
1133_C9	WT	MMS	X	424347	409748	SNP	1	T	2	A/T	52.4/47.6	22/20	42	A	52.381	22	T	47.619	20	GACCATTTAGGTACGTGGGA	CGCAAAGGTTCCCAAACGGT	GACCATTTAGGTACGTGGGA	CGCAAAGGTTCCCAAACGGT	A	14222
1133_C9	WT	MMS	XII	42755	35193	SNP	1	C	2	A/C	53.8/46.2	35/30	65	A	53.846	35	C	46.154	30	TGTCAGTTCCTGATCAATAG	TTCGATATCCTTGGAAAACC	TGTCAGTTCCTGATCAATAG	TTCGATATCCTTGGAAAACC	A
1133_C9	WT	MMS	XII	374423	362989	SNP	1	G	2	G/T	51.6/48.4	32/30	62	G	51.613	32	T	48.387	30	CCAGGTTCAAGTCCTGGCGG	GAAGATTTTTTTGCTCCGAC	CCAGGTTCAAGTCCTGGCGG	GAAGATTTTTTTGCTCCGAC	T	331668
1133_C9	WT	MMS	XIII	332407	318458	SNP	1	T	2	T/A	51.1/48.9	23/22	45	T	51.111	23	A	48.889	22	GCGTCTTCTTTTCCACTTGA	TTATTTCCGATCGAAATTTT	GCGTCTTCTTTTCCACTTGA	TTATTTCCGATCGAAATTTT	A
1133_C9	WT	MMS	XIII	359219	345270	SNP	1	C	2	C/T	53.0/47.0	53/47	100	C	53	53	T	47	47	TCGGTAGGAGGTTCTGGAGG	AGATCGGGAAGTGGAAGATC	TCGGTAGGAGGTTCTGGAGG	AGATCGGGAAGTGGAAGATC	T	26812
1133_C9	WT	MMS	XIII	374944	360004	SNP	1	G	2	T/G	53.3/46.7	2018-08-07	15	T	53.333	8	G	46.667	7	GGGAGTGGGAGATCAGCGAT	ATAGATTCCTCGGTATTCTG	GGAAGTGGAAGATCAGCAAT	ATAGATTCCTCGGTATTCTG	T	15725
1133_C9	WT	MMS	XIII	489223	471154	SNP	1	G	2	T/G	54.8/45.2	34/28	62	T	54.839	34	G	45.161	28	ACCAATTTACAGGATGATTG	GTCGCCATTAAGTTGGCTAG	ACCAATTTACAGGATGATTG	GTCGCCATTAAGTTGGCTAG	T	114279
1133_C9	WT	MMS	XIII	578037	559948	SNP	1	G	2	A/G	50.0/50.0	25/25	50	A	50	25	G	50	25	AGGGTTCCGAGGAAGTGCAG	TGGGTCTCCAATGGGTGGCG	AGGGTTCCGAGGAAGTGCAG	TGGGTCTCCAATGGGTGGCG	A	88814
1133_C9	WT	MMS	XIV	53862	48147	SNP	1	G	2	C/G	54.5/45.5	30/25	55	C	54.545	30	G	45.455	25	CAAACGGGATCCCGCTCATT	TAGGACCCGGCACCGACCGT	CAAACGGGATCCCGCTCATT	TAGGACCCGGCACCGACCGT	C
1133_C9	WT	MMS	XIV	234300	224836	SNP	1	T	2	G/T	53.1/46.9	26/23	49	G	53.061	26	T	46.939	23	CTTTCTCTTTATTTCTTAAC	TGCCTTATAAAAGAAACGAT	CTTTCTCTTTATTTCTTAAC	TGCCTTATAAAAGAAACGAT	G	180438
1133_C9	WT	MMS	XIV	657746	647278	SNP	1	T	2	C/T	52.7/47.3	29/26	55	C	52.727	29	T	47.273	26	ATGCGGAGCTACCAGAACGA	CAGGAGCAGGTCCGTTAGAA	ATGCGGAGCTACCAGAACGA	CAGGAGCAGGTCCGTTAGAA	C	423446
1133_C9	WT	MMS	XV	241357	237886	SNP	1	T	2	A/T	52.4/47.6	33/30	63	A	52.381	33	T	47.619	30	GGGGTCCTCAGGGATATACC	TGCCCTTTTTTTCCTTTTTT	GGGGTCCTCAGGGATATACC	TGCCCTTTTTTTCCTTTTTT	A
1133_C9	WT	MMS	XV	464180	460709	SNP	1	A	2	A/T	51.8/48.2	29/27	56	A	51.786	29	T	48.214	27	TCTTGTCTATTATTTATTGG	TACGCAAAACTCATTTTTTT	TCTTGTCTATTATTTATTGG	TACGCAAAACTCATTTTTTT	T	222823
1133_C9	WT	MMS	XV	1058225	1048318	SNP	1	G	2	G/C	52.4/47.6	33/30	63	G	52.381	33	C	47.619	30	GCTCAAGGCTCTTGAGAACA	GTAATTGTTGTTTAGCACGT	GCTCAAGGCTCTTGAGAACA	GTAATTGTTGTTTAGCACGT	C	594045
1133_C9	WT	MMS	XVI	84267	71350	SNP	1	C	2	T/C	50.8/49.2	33/32	65	T	50.769	33	C	49.231	32	TGACCCTTTAGGTTGTATGC	ACTCTCGAAAACCTAAAGAA	TGACCCTTTAGGTTGTATGC	ACTCTCGAAAACCTAAAGAA	T
1133_C9	WT	MMS	XVI	204934	192017	SNP	1	T	2	T/C	55.0/45.0	33/27	60	T	55	33	C	45	27	TTCAAATAACACTAATGCCA	TCAATAAACGCAAAACACTG	TTCAAATAACACTAATGCCA	TCAATAAACGCAAAACACTG	C	120667
1133_C9	WT	MMS	XVI	353031	340114	SNP	1	T	2	C/T	51.6/48.4	32/30	62	C	51.613	32	T	48.387	30	AATCTCCTACCGTCCATTGT	GAACTGTAGGAATATATGGT	AATCTCCTACCGTCCATTGT	GAACTGTAGGAATATATGGT	C	148097
1133_C9	WT	MMS	XVI	467673	450861	SNP	1	A	2	G/A	54.7/45.3	29/24	53	G	54.717	29	A	45.283	24	TACAAGTTAAACGGAAATGA	TGGGAACTTCTTTACGAGAA	TACAAGTTAAACGGAAATGA	TGGGAACTTCTTTACGAGAA	G	114642
1133_D1	WT	MMS	I	84629	83628	SNP	1	A	2	A/G	53.3/46.7	49/43	92	A	53.261	49	G	46.739	43	AGGTAAAAGATTAAATATTA	AAAATAGTATGAGTACTTTT	AGGTAAAAGATTAAATATTA	AAAATAGTATGAGTACTTTT	G
1133_D1	WT	MMS	II	373590	364970	SNP	1	C	2	C/A	53.2/46.8	42/37	79	C	53.165	42	A	46.835	37	AATAGGAACGGTTTCCAAAG	CATAGAAATTCCTCCTTCAC	AATAGGAACGGTTTCCAAAG	CATAGAAATTCCTCCTTCAC	A
1133_D1	WT	MMS	II	382804	374184	SNP	1	T	2	T/G	52.5/47.5	31/28	59	T	52.542	31	G	47.458	28	TTTAGATATATATGAGTTGA	GAATAAATAGTTATAAAAAC	TTTAGATATATATGAGTTGA	GAATAAATAGTTATAAAAAC	G	9214
1133_D1	WT	MMS	IV	84609	78131	SNP	1	G	2	C/G	52.9/47.1	37/33	70	C	52.857	37	G	47.143	33	CATTAGTGTGGGGTTGGTTC	TTGCTGCGTTTTTCATTTTA	CATTAGTGTGGGGTTGGTTC	TTGCTGCGTTTTTCATTTTA	C
1133_D1	WT	MMS	IV	268051	261555	SNP	1	G	2	A/G	54.3/45.7	38/32	70	A	54.286	38	G	45.714	32	TTCCTACCAACTGATCTAGA	GTGGTAATAAAAGACAAATC	TTCCTACCAACTGATCTAGA	GTGGTAATAAAAGACAAATC	A	183442
1133_D1	WT	MMS	IV	636082	620963	SNP	1	G	2	G/A	54.8/45.2	51/42	93	G	54.839	51	A	45.161	42	ATCTGCCGGGTATCAATCAT	CAGAGACGCTGCTCAGCCAG	ATCTGCCGGGTATCAATCAT	CAGAGACGCTGCTCAGCCAG	A	368031
1133_D1	WT	MMS	IV	709113	688403	SNP	1	A	2	T/A	52.6/47.4	30/27	57	T	52.632	30	A	47.368	27	GCGTTACTCCCGTTATGACA	TTTCACAAGACAAATATCAA	GCGTTACTCCCGTTATGACA	TTTCACAAGACAAATATCAA	T	73031
1133_D1	WT	MMS	IV	765989	745279	SNP	1	A	2	A/G	50.9/49.1	27/26	53	A	50.943	27	G	49.057	26	AGATAACGAGGAAGATGAAG	CGAGGTTGAATATGACGACC	AGATAACGAGGAAGATGAAG	CGAGGTTGAATATGACGACC	G	56876
1133_D1	WT	MMS	IV	768704	747994	SNP	1	G	2	G/A	52.3/47.7	34/31	65	G	52.308	34	A	47.692	31	TTGGTGTTTGGACCGGCGTT	GCCATGGACAACAAACCTGG	TTGGTGTTTGGACCGGCGTT	GCCATGGACAACAAACCTGG	A	2715
1133_D1	WT	MMS	IV	928131	905846	SNP	1	A	2	A/T	54.3/45.7	38/32	70	A	54.286	38	T	45.714	32	CGTAAAAAAACACATTTTCA	ACATAATGACTTGAACGAAT	CGTAAAAAAACACATTTTCA	ACATAATGACTTGAACGAAT	T	159427
1133_D1	WT	MMS	V	2019	2019	SNP	1	A	2	A/G	47.0/41.0	39/34	83	A	46.988	39	G	40.964	34	TTAGTCCTGACGTTGGTACT	GCAGTGGTAATCGCATTAGT	TTAGTCCTGACGTTGGTACT	GCAGTGGTAGTAGCATTAGT	G
1133_D1	WT	MMS	V	81757	81757	SNP	1	T	2	T/C	52.0/48.0	39/36	75	T	52	39	C	48	36	TTGAGGATATCTAGCACTTA	GTTTTCCAACAATGGGGCTA	TTGAGGATATCTAGCACTTA	GTTTTCCAACAATGGGGCTA	C	79738
1133_D1	WT	MMS	V	249507	249499	SNP	1	A	2	G/A	52.4/47.6	43/39	82	G	52.439	43	A	47.561	39	TGTTACCTGAATATTATCAC	TGCTGCTTAAAAATGTGTTA	TGTTACCTGAATATTATCAC	TGCTGCTTAAAAATGTGTTA	G	167750
1133_D1	WT	MMS	V	482942	478319	SNP	1	T	2	T/A	52.4/47.6	33/30	63	T	52.381	33	A	47.619	30	CTGAAACGTTTGCTTGTTTG	TCTGTTGGAAAAAATGGGAC	CTGAAACGTTTGCTTGTTTG	TCTGTTGGAAAAAATGGGAC	A	233435
1133_D1	WT	MMS	VI	144864	139622	SNP	1	C	2	A/C	51.4/48.6	38/36	74	A	51.351	38	C	48.649	36	GAACTTATTTTGAAGTTATT	CTGTCGACTGCCTGATGTCA	GAACTTATTTTGAAGTTATT	CTGTCGACTGCCTGATGTCA	A
1133_D1	WT	MMS	VII	211554	205059	SNP	1	C	2	C/T	54.3/45.7	44/37	81	C	54.321	44	T	45.679	37	TGAGAATGATACCAATATTC	CTCAGGGGAATCGCTGGCAA	TGAGAATGATACCAATATTC	CTCAGGGGAATCGCTGGCAA	T
1133_D1	WT	MMS	VII	897669	871077	SNP	1	A	2	A/G	53.1/46.9	43/38	81	A	53.086	43	G	46.914	38	AGGACAAAAAAAAATGAAGA	TACACTGCGTTGAAAATTTT	AGGACAAAAAAAAATGAAGA	TACACTGCGTTGAAAATTTT	G	686115
1133_D1	WT	MMS	VII	1083893	1057305	SNP	1	T	2	T/C	50.6/49.4	45/44	89	T	50.562	45	C	49.438	44	GAACGCTGAGGCAAGCGCCG	GCATAATGATGTGAGTGCAT	GAACGCTGAGGCAAGCGCCG	GCATAATGATGTGAGTGCAT	C	186224
1133_D1	WT	MMS	VIII	353930	345681	SNP	1	T	2	C/T	51.5/48.5	34/32	66	C	51.515	34	T	48.485	32	AAGGAGGAGGAAGAGCCTGA	CTCATTGATGCTCAAGAAAT	AAGGAGGAGGAAGAGCCTGA	CTCATTGATGCTCAAGAAAT	C
1133_D1	WT	MMS	VIII	405107	396859	SNP	1	T	2	T/A	52.5/47.5	42/38	80	T	52.5	42	A	47.5	38	GATACAGATAAATTCTCGCA	TTGTTTGAAGGATTATCTGA	GATACAGATAAATTCTCGCA	TTGTTTGAAGGATTATCTGA	A	51177
1133_D1	WT	MMS	X	528275	508612	SNP	1	G	2	A/G	51.4/48.6	37/35	72	A	51.389	37	G	48.611	35	AGATGAATCTTTATTCAACA	GGAGCTTCTGCGCGAGCTGC	AGATGAATCTTTATTCAACA	GGAGCTTCTGCGCGAGCTGC	A
1133_D1	WT	MMS	XI	340347	340353	SNP	1	G	2	A/G	52.1/47.9	38/35	73	A	52.055	38	G	47.945	35	CCTGCAAATTCACCAGCCCA	TCTCTTGAAACATAGTCCCC	CCTGCAAATTCACCAGCCCA	TCTCTTGAAACATAGTCCCC	A
1133_D1	WT	MMS	XI	456535	456530	SNP	1	C	2	C/A	51.4/48.6	37/35	72	C	51.389	37	A	48.611	35	CGCGAGGGTTTCCGCCAAAC	AACTAAGCCCATTTTAGCTG	CGCGAGGGTTTCCGCCAAAC	AACTAAGCCCATTTTAGCTG	A	116188
1133_D1	WT	MMS	XI	534440	534232	SNP	1	C	2	C/G	51.5/48.5	35/33	68	C	51.471	35	G	48.529	33	AATCCAGCCCACTGACTACG	CAATGAACGCTACGCTATCT	AATCCAGCCCACTGACTACG	CAATGAACGCTACGCTATCT	G	77905
1133_D1	WT	MMS	XII	48692	41639	SNP	1	A	2	A/T	50.8/49.2	33/32	65	A	50.769	33	T	49.231	32	ATAAAAAAAAAAAATAGTGA	TTTCAACGTGCGCATCACAA	ATAAAAAAAAAAAATAGTGA	TTTCAACGTGCGCATCACAA	T
1133_D1	WT	MMS	XIII	52818	47962	SNP	1	A	2	A/T	54.5/45.5	42/35	77	A	54.545	42	T	45.455	35	AGGAGGTCTAAATTCAACAC	TATAAGATCAGACTAGAGGG	AGGAGGTCTAAATTCAACAC	TATAAGATCAGACTAGAGGG	T
1133_D1	WT	MMS	XIII	54172	49319	SNP	1	G	2	A/G	53.9/46.1	48/41	89	A	53.933	48	G	46.067	41	AATTCACAGACAGTGCTTTT	GATTCCCATTACCAATGATA	AATTCACAGACAGTGCTTTT	GATTCCCATTACCAATGATC	A	1354
1133_D1	WT	MMS	XIII	102296	97438	SNP	1	G	2	G/T	50.0/50.0	41/41	82	G	50	41	T	50	41	AATATATTAAAACAGTATTG	CAATACACCGGAGAGATCAT	AATATATTAAAACAGTATTG	CAATACACCGGAGAGATCAT	T	48124
1133_D1	WT	MMS	XIII	107148	102290	SNP	1	C	2	C/T	50.0/50.0	45/45	90	C	50	45	T	50	45	AATTTCAAAGTTGAATTACC	ATTAGAAAACTTCATTAAGC	AATTTCAAAGTTGAATTACC	ATTAGAAAACTTCATTAAGC	T	4852
1133_D1	WT	MMS	XIII	108426	103568	SNP	1	T	2	T/C	50.6/49.4	39/38	77	T	50.649	39	C	49.351	38	ATTGTATTGCGGTGCTAGAA	TCTTGGCGATACACCAGTCT	ATTGTATTGCGGTGCTAGAA	TCTTGGCGATACACCAGTCT	C	1278
1133_D1	WT	MMS	XIII	122376	117518	SNP	1	G	2	G/A	52.6/47.4	40/36	76	G	52.632	40	A	47.368	36	ACTCGCGGGGAAACTCCAAA	CACACTTAGAGAATAAAAAT	ACTCGCGGGGAAACTCCAAA	CACACTTAGAGAATAAAAAT	A	13950
1133_D1	WT	MMS	XIII	125651	120793	SNP	1	T	2	A/T	53.8/46.2	42/36	78	A	53.846	42	T	46.154	36	CCTTGTAATTTGATACTTCC	TGTGTGTTTAAATTCAAATT	CCTTGTAATTTGATACTTCC	TGTGTGTTTAAATTCAAATT	A	3275
1133_D1	WT	MMS	XIII	132338	127480	SNP	1	T	2	A/T	54.8/45.2	40/33	73	A	54.795	40	T	45.205	33	GAAAATGAGTATGGAAGTGT	GCATATGATAGGGCGGCTAC	GAAAATGAGTATGGAAGTGT	GCATATGATAGGGCGGCTAC	A	6687
1133_D1	WT	MMS	XIII	594662	576184	SNP	1	C	2	C/T	55.0/45.0	44/36	80	C	55	44	T	45	36	AGAAAAATAGGAATGTGATA	CTTCTATTGCATGCAAAGAT	AGAAAAATAGGAATGTGATA	CTTCTATTGCATGCAAAGAT	T	462324
1133_D1	WT	MMS	XIII	820909	802428	SNP	1	T	2	C/T	51.2/48.8	43/41	84	C	51.19	43	T	48.81	41	GTCAAGAGCTTTACGTTGGA	GAGGAGTTAGTACTCCCACT	GTCAAGAGCTTTACGTTGGA	GAGGAGTTAGTACTCCCACT	C	226247
1133_D1	WT	MMS	XIV	246664	237007	SNP	1	C	2	C/T	50.0/50.0	47/47	94	C	50	47	T	50	47	GCATCCTCTTTTCTTTGATA	ATTTCTTTTATCCGTTCTCC	GCATCCTCTTTTCTTTGATA	ATTTCTTTTATCCGTTCTCC	T
1133_D1	WT	MMS	XIV	249194	239537	SNP	1	T	2	C/T	50.7/49.3	37/36	73	C	50.685	37	T	49.315	36	GGAACAACAGAGAGTGGTTA	ATTGCTATTGGGTCAGAAAA	GGAACAACAGAGAGTGGTTA	ATTGCTATTGGGTCAGAAAA	C	2530
1133_D1	WT	MMS	XIV	647063	636415	SNP	1	C	2	C/T	50.6/49.4	40/39	79	C	50.633	40	T	49.367	39	TTAATTGTCCGGGTAACTAA	TGTCTTCCACTTTCAGCACG	TTAATTGTCCGGGTAACTAA	TGTCTTCCACTTTCAGCACG	T	397869
1133_D1	WT	MMS	XV	373268	369856	SNP	1	T	2	A/T	50.0/50.0	25/25	50	A	50	25	T	50	25	GCCCTTCAAATCCTTTGTAG	CCATCTTAAACCAAGTTTTA	GCCCTTCAAATCCTTTGTAG	CCATCTTAAACCAAGTTTTA	A
1133_D1	WT	MMS	XV	713311	704906	SNP	1	A	2	A/T	50.0/50.0	33/33	66	A	50	33	T	50	33	CAAAAACGTGGACGTAGATG	AAATGATAAAGAAGGTAGCC	CAAAAACGTGGACGTAGATG	AAATGATAAAGAAGGTAGCC	T	340043
1133_D1	WT	MMS	XVI	504946	488218	SNP	1	T	2	T/C	54.2/45.8	32/27	59	T	54.237	32	C	45.763	27	CCAAATATTTTATAAAAATA	CTTTTAAATCGCCAATTGTC	CCAAATATTTTATAAAAATA	CTTTTAAATCGCCAATTGTC	C
1133_D1	WT	MMS	XVI	826474	805591	SNP	1	G	2	G/T	52.0/48.0	39/36	75	G	52	39	T	48	36	GGATCCATACTAGAAGAGGC	CATCCTCGCCACTTTTAGTG	GGATCCATACTAGAAGAGGC	CATCCTCGCCACTTTTAGTG	T	321528
1133_D1	WT	MMS	XVI	898438	870943	SNP	1	T	2	C/T	54.9/45.1	50/41	91	C	54.945	50	T	45.055	41	AAACCTTGTACCTTCAAGTC	TTACTTGTCTTGACTGCCAT	AAACCTTGTACCTTCAAGTC	TTACTTGTCTTGACTGCCAT	C	71964
1133_D1	WT	MMS	VI	78011	77629	DIP	2	AT	2	AT/--	52.8/45.3	28/24	53	AT	52.83	28	--	45.283	24	ACCCTCGTACTTTTCATTTC	ATATATATATATATATATAT	ACCCTCGTACTTTTCATTTC	ATATATATATATATATATAT	--
1133_D1	WT	MMS	XV	888849	880442	DIP	1	-	2	-/T	53.6/42.9	15/12	28	-	53.571	15	T	42.857	12	CCGCTTCATTGGTTTGCTAG	TTTTTTTTTTTTTTTTTTTT	CCGCTTCATTGGTTTGCTAG	TTTTTTTTTTTTTTTTTTTT	T
1133_D1	WT	MMS	XVI	144209	131479	DIP	1	A	2	-/A	52.1/47.9	38/35	73	-	52.055	38	A	47.945	35	GGTGTGCTTGAAAACTATCC	AAAAAATGCATTGATTACCT	GGTGTGCTTGAAAACTATCC	AAAAAATGCATTGATTACCT	-
1133_D1	WT	MMS	XVI	830143	809260	DIP	1	-	2	T/-	54.8/45.2	40/33	73	T	54.795	40	-	45.205	33	TAGTTTTGTTCACACTGGAC	TTTTTGAACTTTGTGTTCAC	TAGTTTTGTTCACACTGGAC	TTTTTGAACTTTGTGTTCAC	T	685934
1133_D2	WT	MMS	II	715771	705690	SNP	1	G	2	A/G	54.7/45.3	47/39	86	A	54.651	47	G	45.349	39	TGCGTGTTAGACCATAATTT	AATAGTCATTCATTAAGAGT	TGCGTGTTAGACCATAATTT	AATAGTCATTCATTAAGAGT	A
1133_D2	WT	MMS	III	152809	147101	SNP	1	C	2	C/T	51.2/48.8	43/41	84	C	51.19	43	T	48.81	41	CATTTGATTTAAGAAGTTTA	TGTTCTAAGAAAATAAAGAA	CATTTGATTTAAGAAGTTTA	TGTTCTAAGAAAATAAAGAA	T
1133_D2	WT	MMS	IV	1135436	1104946	SNP	1	G	2	G/A	51.8/48.2	43/40	83	G	51.807	43	A	48.193	40	ATGCTCTAGAGCTCATGTTC	AGTACTTTACAAATATATTT	ATGCTCTAGAGCTCATGTTC	AGTACTTTACAAATATATTT	A
1133_D2	WT	MMS	IV	1329131	1291621	SNP	1	C	2	T/C	54.1/45.9	33/28	61	T	54.098	33	C	45.902	28	GTCGCCCACCAATGCACCAC	GTCAAGAAGGAGAACTCTCG	GTCGCCCACCAATGCACCAC	GTCAAGAAGGAGAACTCTCG	T	193695
1133_D2	WT	MMS	IV	1357818	1320308	SNP	1	G	2	T/G	52.1/47.9	37/34	71	T	52.113	37	G	47.887	34	GAGTGATGTCAATCATTACT	TTTTCAAATACAATTCTGGT	GAGTGATGTCAATCATTACT	TTTTCAAATACAATTCTGGT	T	28687
1133_D2	WT	MMS	IV	1480279	1442769	SNP	1	C	2	C/T	54.9/45.1	50/41	91	C	54.945	50	T	45.055	41	GATTATTCTCACCAGTTACC	GTTTATGCTCTTGAAGAGAT	GATTATTCTCACCAGTTACC	GTTTATGCTCTTGAAGAGAT	T	122461
1133_D2	WT	MMS	V	152053	152052	SNP	1	A	2	A/T	51.5/48.5	34/32	66	A	51.515	34	T	48.485	32	CAATATTTATTAAATAAAAA	TTTGAAAAATATATAAAAAT	CAATATTTATTAAATAAAAA	TTTGAAAAATATATAAAAAT	T
1133_D2	WT	MMS	V	464889	459871	SNP	1	T	2	C/T	52.4/47.6	43/39	82	C	52.439	43	T	47.561	39	CAATTTCTACCAATACTGAT	CCCCTCTGATAGCTGAGATG	CAATTTCTACCAATACTGAT	CCCCTCTGATAGCTGAGATG	C	312836
1133_D2	WT	MMS	VI	267139	261852	SNP	1	T	2	T/G	53.8/46.2	42/36	78	T	53.846	42	G	46.154	36	CCTAGGATTTTTGCCATGTA	GCAACTGCTCTACCATCATT	CCTAGGATTTTTGCCATGTA	GCAACTGCTCTACCATCATT	G
1133_D2	WT	MMS	VII	33015	26752	SNP	1	A	2	A/G	50.6/49.4	41/40	81	A	50.617	41	G	49.383	40	ATATGTTTCAGGAGAAGAAA	TCACTCAATAGTGCCACACC	ATATGTTTCAGGAGAAGAAA	TCACTCAATAGTGCCACACC	G
1133_D2	WT	MMS	VII	268755	262494	SNP	1	C	2	T/C	51.1/48.9	46/44	90	T	51.111	46	C	48.889	44	TGCGACTTCTTGAAGGAACC	AAATGGTGAAGGGATTTGTA	TGCGACTTCTTGAAGGAACC	AAATGGTGAAGGGATTTGTA	T	235740
1133_D2	WT	MMS	VII	959824	934312	SNP	1	G	2	G/A	55.0/45.0	33/27	60	G	55	33	A	45	27	CAATATTGTGGGTTGAGGTG	AGACTTGATTTTTCTTATAC	CAATATTGTGGGTTGAGGTG	AGACTTGATTTTTCTTATAC	A	691069
1133_D2	WT	MMS	VII	983338	957831	SNP	1	G	2	A/G	50.7/49.3	35/34	69	A	50.725	35	G	49.275	34	TATTCAATGCTTCTTCACTT	TTTGAAACATCTCTTCTTTG	TATTCAATGCTTCTTCACTT	TTTGAAACATCTCTTCTTTG	A	23514
1133_D2	WT	MMS	VII	1017266	991767	SNP	1	G	2	G/A	53.1/46.9	43/38	81	G	53.086	43	A	46.914	38	CTCGCACGAGAACAATGTTA	AACTTGTCAAATCACCATGA	CTCGCACGAGAACAATGTTA	AACTTGTCAAATCACCATGA	A	33928
1133_D2	WT	MMS	VIII	31365	31368	SNP	1	G	2	A/G	54.9/45.1	45/37	82	A	54.878	45	G	45.122	37	TGAACTGTCACATAAAGGTA	TTTGCTAGTTCCGATACCTT	TGAACTGTCACATAAAGGTA	TTTGCTAGTTCCGATACCTT	A
1133_D2	WT	MMS	VIII	218771	210689	SNP	1	C	2	C/A	52.6/47.4	41/37	78	C	52.564	41	A	47.436	37	GTCGTCCTGATCAATCAACT	ACCCACATCAGATGCAATAA	GTCGTCCTGATCAATCAACT	ACCCACATCAGATGCAATAA	A	187406
1133_D2	WT	MMS	VIII	277912	269830	SNP	1	A	2	G/A	52.4/47.6	43/39	82	G	52.439	43	A	47.561	39	TTTCAAATACTATTGGCACA	AGGGAAGGGCTTTTCAGGGA	TTTCAAATACTATTGGCACA	AGGGAAGGGCTTTTCAGGGA	G	59141
1133_D2	WT	MMS	VIII	278148	270066	SNP	1	T	2	A/T	54.3/45.7	44/37	81	A	54.321	44	T	45.679	37	AGTTCCTAATACATTGCGGG	ACAAATGTCCTATAAACAAA	AGTTCCTAATACATTGCGGG	ACAAATGTCCTATAAACAAA	A	236
1133_D2	WT	MMS	IX	206152	189471	SNP	1	A	2	A/G	52.7/47.3	87/78	165	A	52.727	87	G	47.273	78	TGTCAGAATGCACAAACCAG	GACATTAAAAGACGCCATGG	TGTCAGAATGCACAAACCAG	GACATTAAAAGACGCCATGG	G
1133_D2	WT	MMS	X	153749	139834	SNP	1	T	2	T/A	53.3/46.7	40/35	75	T	53.333	40	A	46.667	35	AGCCAACAAATCAGTGGAGA	CAAAATTCTGGAAGAACCAC	AGCCAACAAATCAGTGGAGA	CAAAATTCTGGAAGAACCAC	A
1133_D2	WT	MMS	X	390782	376518	SNP	1	C	2	C/G	52.3/47.7	34/31	65	C	52.308	34	G	47.692	31	ATCAGTTCATCTATGTTGTT	AGGGATTCTTTTGAAAAAAG	ATCAGTTCATCTATGTTGTT	AGGGATTCTTTTGAAAAAAG	G	237033
1133_D2	WT	MMS	X	709171	689379	SNP	1	A	2	A/T	51.3/48.7	40/38	78	A	51.282	40	T	48.718	38	GAGCTTGCAACAGAACTTTC	GCAGAACTTGCAATGGTGCT	GAGCTTGCAACAGAACTTTC	GCAGAACTTGCAATGGTGCT	T	318389
1133_D2	WT	MMS	XI	203028	203040	SNP	1	G	2	T/G	52.7/47.3	29/26	55	T	52.727	29	G	47.273	26	GCGCAATCGGTAGCGCGTAT	ACTCTTAATCATAAGGTTAG	GCGCAATCGGTAGCGCGTAT	ACTCTTAATCATAAGGTTAG	T
1133_D2	WT	MMS	XI	624199	623953	SNP	1	A	2	A/G	51.2/48.8	43/41	84	A	51.19	43	G	48.81	41	AACATAGTTGAGTCTATGAA	AAGTCTTTTGAAGAAGATAA	AACATAGTTGAGTCTATGAA	AAGTCTTTTGAAGAAGATAA	G	421171
1133_D2	WT	MMS	XII	342305	331175	SNP	1	C	2	C/G	51.3/48.7	39/37	76	C	51.316	39	G	48.684	37	ACTTTATCAGTAAAATTCTG	CTCAATTGACCAGGGGAAAG	ACTTTATCAGTAAAATTCTG	CTCAATTGACCAGGGGAAAG	G
1133_D2	WT	MMS	XII	845680	792862	SNP	1	C	2	C/G	54.7/45.3	41/34	75	C	54.667	41	G	45.333	34	AAGACGTTAACAATGCTTTA	AACCTTTCCAAAAGTACCTA	AAGACGTTAACAATGCTTTA	AACCTTTCCAAAAGTACCTA	G	503375
1133_D2	WT	MMS	XV	102338	102284	SNP	1	A	2	A/T	50.7/49.3	38/37	75	A	50.667	38	T	49.333	37	AAGTTTGTTGAGCCACATTC	GGGATCCACATAGATGTTTC	AAGTTTGTTGAGCCACATTC	GGGATCCACATAGATGTTTC	T
1133_D2	WT	MMS	XV	343818	340444	SNP	1	G	2	G/A	53.0/47.0	35/31	66	G	53.03	35	A	46.97	31	AACCGGCTCGTACGGGGAAA	CAAGGTCATCTAGTGCTCAC	AACCGGCTCGTACGGGGAAA	CAAGGTCATCTAGTGCTCAC	A	241480
1133_D2	WT	MMS	XV	722953	714168	SNP	1	G	2	G/T	54.9/45.1	28/23	51	G	54.902	28	T	45.098	23	TGCAAAATTTAAGCATCAAC	ACAACAACGAGAATGGTTAT	TGCAAAATTTAAGCATCAAC	ACAACAACGAGAATGGTTAT	T	379135
1133_D2	WT	MMS	XIII	698680	681137	DIP	1	A	2	-/A	50.0/41.2	34/28	68	-	50	34	A	41.176	28	TGTTACAAATTTACTTTGGT	AAAAAAAAAAAAAAAATTGC	TGTTACAAATTTACTTTGGT	AAAAAAAAAAAAAAAATTGC	-
1133_D3	WT	MMS	II	7003	5077	SNP	1	G	2	C/G	50.0/50.0	50/50	100	C	50	50	G	50	50	TACTATATTATAACTTATCA	CGCCGTATACTAAAACGGAC	TACTATATTATAACTTATCA	CGCCGTATACTAAAACGGAC	C
1133_D3	WT	MMS	IV	256558	249906	SNP	1	G	2	G/T	50.8/49.2	30/29	59	G	50.847	30	T	49.153	29	GTCTATTTAATACATTTGAC	TTATTTGATCTTCACGTTGT	GTCTATTTAATACATTTGAC	TTATTTGATCTTCACGTTGT	T
1133_D3	WT	MMS	V	62295	62290	SNP	1	A	2	G/A	54.8/45.2	40/33	73	G	54.795	40	A	45.205	33	TTGATAATGTAATAGGATCA	TGAATATTAACATATAAAAT	TTGATAATGTAATAGGATCA	TGAATATTAACATATAAAAT	G
1133_D3	WT	MMS	VII	94399	87895	SNP	1	C	2	T/C	54.0/46.0	34/29	63	T	53.968	34	C	46.032	29	TGGCGCTCCAAAGGGTCCTA	CATCAGCTTAACACCGGCAC	TGGCGCTCCAAAGGGTCCTA	CATCAGCTTAACACCGGCAC	T
1133_D3	WT	MMS	VII	97452	90948	SNP	1	C	2	C/A	52.5/47.5	31/28	59	C	52.542	31	A	47.458	28	ATGCTCAAGGCTGCGAACCG	AAGAAATGGATGCTGTGAGC	ATGCTCAAGGCTGCGAACCG	AAGAAATGGATGCTGTGAGC	A	3053
1133_D3	WT	MMS	VII	358757	352253	SNP	1	C	2	C/A	54.2/45.8	39/33	72	C	54.167	39	A	45.833	33	CGTATCAAATTTCGGTATCC	AATTGCTGCTATATATGATC	CGTATCAAATTTCGGTATCC	AATTGCTGCTATATATGATC	A	261305
1133_D3	WT	MMS	VII	461048	454545	SNP	1	G	2	T/G	52.7/47.3	29/26	55	T	52.727	29	G	47.273	26	TGGAATTGAAAGAACTTTAC	GTATACCGTACGAAGAGGAA	TGGAATTGAAAGAACTTTAC	GTATACCGTACGAAGAGGAA	T	102291
1133_D3	WT	MMS	VIII	22728	22731	SNP	1	A	2	A/T	50.7/49.3	35/34	69	A	50.725	35	T	49.275	34	AGCTACCATCCACCTTAGTT	GCGGTTTGCCCGTGGATTTT	AGCTACCATCCACCTTAGTT	GCGGTTTGCCCGTGGATTTT	T
1133_D3	WT	MMS	VIII	71827	71827	SNP	1	G	2	G/A	53.4/46.6	31/27	58	G	53.448	31	A	46.552	27	CAAATAATGACGTATTGTTC	ACGTAGATTACGACAGAGAT	CAAATAATGACGTATTGTTC	ACGTAGATTACGACAGAGAT	A	49099
1133_D3	WT	MMS	X	538587	518460	SNP	1	C	2	T/C	52.8/47.2	19/17	36	T	52.778	19	C	47.222	17	TAATGGTAACGCGTCTCCCT	CTAAGGAGAAGACTGCGGGT	TAATGGTAACGCGTCTCCCT	CTAAGGAGAAGACTGCGGGT	T
1133_D3	WT	MMS	X	712126	691995	SNP	1	G	2	G/A	52.7/45.5	29/25	55	G	52.727	29	A	45.455	25	TCATACAAACCATTCAAAGT	TATAGGAGTATGTTCACAAA	TCATACAAACCATTCAAAGT	TATAGGAGTATGTTCACAAA	A	173539
1133_D3	WT	MMS	XI	662496	662255	SNP	1	C	2	T/C	51.6/48.4	33/31	64	T	51.562	33	C	48.438	31	TTGGGCACCCCTTGGTGTTA	TTTTTTCAATTTTTTCACCT	TTGGGCACCCCTTGGTGTTA	TTTTTTCAATTTTTTCACCT	T
1133_D3	WT	MMS	XII	39348	32260	SNP	1	A	2	A/G	54.3/45.7	38/32	70	A	54.286	38	G	45.714	32	CCACTTCAGAGTATTTATAT	GGATGCGCATGCCAGCACAG	CCACTTCAGAGTATTTATAT	GGATGCGCATGCCAGCACAG	G
1133_D3	WT	MMS	XII	93252	86166	SNP	1	T	2	T/G	53.4/46.6	31/27	58	T	53.448	31	G	46.552	27	AGTGAGATTATTTAGTACAA	ATGTGGGTAATAAAAACTAA	AGTGAGATTATTTAGTACAA	ATGTGGGTAATAAAAACTAA	G	53904
1133_D3	WT	MMS	XII	170357	163266	SNP	1	T	2	C/T	52.6/47.4	30/27	57	C	52.632	30	T	47.368	27	GCTGCCGTCTTCATAGAATG	TGTTCTATTATCCACCTCGA	GCTGCCGTCTTCATAGAATG	TGTTCTATTATCCACCTCGA	C	77105
1133_D3	WT	MMS	XIII	400389	381593	SNP	1	C	2	T/C	55.0/45.0	33/27	60	T	55	33	C	45	27	GAAATAAAGTGAATGATGTA	TCTATGAAACTTCCGAACAA	GAAATAAAGTGAATGATGTA	TCTATGAAACTTCCGAACAA	T
1133_D3	WT	MMS	XIV	7372	1544	SNP	1	A	2	G/A	52.3/47.7	46/42	88	G	52.273	46	A	47.727	42	TTACAAAAAAATCACCACTA	AATCACCTAAACATAAAAAT	TTACAAAAAAATCACCACTA	AATCACCTAAACATAAAAAT	G
1133_D3	WT	MMS	XIV	631860	621421	SNP	1	C	2	G/C	54.3/45.7	38/32	70	G	54.286	38	C	45.714	32	TCAATGGGGGCGAGCCGGGA	TCGAACCCGGGACCTCCCGC	TCAATGGGGGCGAGCCGGGA	TCGAACCCGGGACCTCCCGC	G	624488
1133_D3	WT	MMS	XV	592071	588299	SNP	1	T	2	A/T	50.0/50.0	28/28	56	A	50	28	T	50	28	AATGCCAATTTTTTTCAACG	CTTGGCAAATTCTTCAGCAG	AATGCCAATTTTTTTCAACG	CTTGGCAAATTCTTCAGCAG	A
1133_D3	WT	MMS	XV	676427	668442	SNP	1	C	2	C/G	50.8/49.2	31/30	61	C	50.82	31	G	49.18	30	AGAGGGGAGTCATTGATTGA	AATCAAAGGAAAAGATATAA	AGAGGGGAGTCATTGATTGA	AATCAAAGGAAAAGATATAA	G	84356
1133_D3	WT	MMS	XVI	856897	829414	SNP	1	G	2	A/G	52.0/48.0	39/36	75	A	52	39	G	48	36	AATACAACAATTTACAACAA	ATTCGGGCGTGTGGCGTAGT	AATACAACAATTTACAACAA	ATTCGGGCGTGTGGCGTAGT	A
1133_D3	WT	MMS	XIII	440860	422066	DIP	1	-	2	A/-	51.0/49.0	25/24	49	A	51.02	25	-	48.98	24	TCAAATACCTACCTTTCTCG	AAAAAACCAATCGAAACAAG	TCAAATACCTACCTTTCTCG	AAAAAACCAATCGAAACAAG	A
1133_D4	WT	MMS	I	88046	87046	SNP	1	T	2	T/A	53.7/46.3	36/31	67	T	53.731	36	A	46.269	31	GTTAGCTAAATAATTCAAGA	TTCGTTCGGTACTCCAGCTT	GTTAGCTAAATAATTCAAGA	TTCGTTCGGTACTCCAGCTT	A
1133_D4	WT	MMS	II	163067	161017	SNP	1	T	2	C/T	51.5/48.5	34/32	66	C	51.515	34	T	48.485	32	GAACTTCTTACCAAACAAGA	CATTTGCAGTTGGTCGTACA	GAACTTCTTACCAAACAAGA	CATTTGCAGTTGGTCGTACA	C
1133_D4	WT	MMS	II	163419	161369	SNP	1	G	2	G/A	53.6/46.4	30/26	56	G	53.571	30	A	46.429	26	ATACCAACGACAGAAGGTAA	AAACCTCTGTAAAGACCAGC	ATACCAACGACAGAAGGTAA	AAACCTCTGTAAAGACCAGC	A	352
1133_D4	WT	MMS	II	226657	224209	SNP	1	T	2	T/C	52.5/47.5	21/19	40	T	52.5	21	C	47.5	19	CACTATCGTCTATCAACTAA	AGTTATATTATCAATATATT	CACTATCGTCTATCAACTAA	AGTTATATTATCAATATATT	C	63238
1133_D4	WT	MMS	II	306746	298930	SNP	1	C	2	T/C	52.6/47.4	30/27	57	T	52.632	30	C	47.368	27	AAAAGAAGAATCCTGGACGA	ACCCTCCCACTAGGTAGTTC	AAAAGAAGAATCCTGGACGA	ACCCTCCCACTAGGTAGTTC	T	80089
1133_D4	WT	MMS	IV	1221436	1182494	SNP	1	A	2	T/A	52.2/47.8	36/33	69	T	52.174	36	A	47.826	33	GTTGTCTCCGGAAAATATTC	TTGTAACTTAATTCCATGTT	GTTGTCTCCGGAAAATATTC	TTGTAACTTAATTCCATGTT	T
1133_D4	WT	MMS	VII	78624	72127	SNP	1	T	2	C/T	50.0/50.0	30/30	60	C	50	30	T	50	30	AAGAACCTCAGTATAGATTG	TGCATAAGATCGTGAATTCT	AAGAACCTCAGTATAGATTG	TGCATAAGATCGTGAATTCT	C
1133_D4	WT	MMS	VII	248007	241510	SNP	1	T	2	T/C	50.7/49.3	36/35	71	T	50.704	36	C	49.296	35	GACCTTTTAGATACCTCAAG	TCGGACGGAGGATTTAGGTC	GACCTTTTAGATACCTCAAG	TCGGACGGAGGATTTAGGTC	C	169383
1133_D4	WT	MMS	VII	482048	475549	SNP	1	C	2	C/T	51.6/48.4	32/30	62	C	51.613	32	T	48.387	30	ATCAGTTGGGATAACAGTAC	ATCTTCCAATTGCAAAATAT	ATCAGTTGGGATAACAGTAC	ATCTTCCAATTGCAAAATAT	T	234041
1133_D4	WT	MMS	VII	961513	935644	SNP	1	G	2	A/G	50.0/50.0	41/41	82	A	50	41	G	50	41	CGATCTTGTCTTTCGGTAAA	TGTGGAAAGGTGTTCATTTC	CGATCTTGTCTTTCGGTAAA	TGTGGAAAGGTGTTCATTTC	A	479465
1133_D4	WT	MMS	VII	967913	942044	SNP	1	T	2	A/T	51.9/48.1	27/25	52	A	51.923	27	T	48.077	25	ATATGCCACCATTGTATGAT	TGTTAAAGGAGGAGGCAGGT	ATATGCCACCATTGTATGAT	TGTTAAAGGAGGAGGCAGGT	A	6400
1133_D4	WT	MMS	VII	971651	945782	SNP	1	C	2	C/A	53.6/46.4	37/32	69	C	53.623	37	A	46.377	32	ATTGCTTCAAGGACCTGAAA	CTTCAAAACCACCAAGAATA	ATTGCTTCAAGGACCTGAAA	CTTCAAAACCACCAAGAATA	A	3738
1133_D4	WT	MMS	VIII	386341	378238	SNP	1	G	2	G/C	50.6/49.4	41/40	81	G	50.617	41	C	49.383	40	CTTCTACGCAATCGATATCC	TCTCCAGCTCGGATGGCACT	CTTCTACGCAATCGATATCC	TCTCCAGCTCGGATGGCACT	C
1133_D4	WT	MMS	IX	28183	11831	SNP	1	G	2	T/G	51.5/48.5	53/50	103	T	51.456	53	G	48.544	50	CATGTGGTACACTTTTTAAA	GTTTACATGAAGTTTACCAT	CATGTGGTACACTTTTTAAA	GTTTACATGAAGTTTACCAT	T
1133_D4	WT	MMS	IX	125574	109227	SNP	1	A	2	A/G	50.0/50.0	41/41	82	A	50	41	G	50	41	GGTTCGTGGGCATACACAGA	CCACGCTTACACACAACATT	GGTTCGTGGGCATACACAGA	CCACGCTTACACACAACATT	G	97391
1133_D4	WT	MMS	X	32837	18738	SNP	1	C	2	A/C	53.0/47.0	44/39	83	A	53.012	44	C	46.988	39	AAAAATACAGAGGTGCTTTA	AAAGGAATTGATGCAATGAA	AAAAATACAGAGGTGCTTTA	AAAGGAATTGATGCAATGAA	A
1133_D4	WT	MMS	X	81079	66979	SNP	1	C	2	G/C	50.7/49.3	38/37	75	G	50.667	38	C	49.333	37	ACGATATTTCCCCCGTGTCA	GTTATGATCCATTTGTTAGT	ACGATATTTCCCCCGTGTCA	GTTATGATCCATTTGTTAGT	G	48242
1133_D4	WT	MMS	X	518431	498358	SNP	1	G	2	G/T	54.8/45.2	34/28	62	G	54.839	34	T	45.161	28	AACGTTTCCGCTCATAGATC	ATTCAAATAAGATTATAGAC	AACGTTTCCGCTCATAGATC	ATTCAAATAAGATTATAGAC	T	437352
1133_D4	WT	MMS	X	538629	518556	SNP	1	G	2	G/A	54.4/45.6	31/26	57	G	54.386	31	A	45.614	26	CGAGTCCCGTACGGAACGTT	ATTATTTTTTTTTTTTCGTT	CGAGTCCCGTACGGAACGTT	ATTATTTTTTTTTTTTCGTT	A	20198
1133_D4	WT	MMS	X	703947	683870	SNP	1	G	2	A/G	53.1/46.9	43/38	81	A	53.086	43	G	46.914	38	GCGCATTGTTCTGTGGCCAC	GCCTTCCTGGACCCGTCCTT	GCGCATTGTTCTGTGGCCAC	GCCTTCCTGGACCCGTCCTT	A	165318
1133_D4	WT	MMS	XI	270705	270717	SNP	1	C	2	C/G	53.8/46.2	85/73	158	C	53.797	85	G	46.203	73	TTGCTTTTCAGATTTATTTC	CCGTTATACAAGTTCAAGGA	TTGCTTTTCAGATTTATTTC	CCGTTATACAAGTTCAAGGA	G
1133_D4	WT	MMS	XI	302350	302362	SNP	1	G	2	G/A	54.5/45.5	90/75	165	G	54.545	90	A	45.455	75	TAGTGGATTCCATTGTTGAT	AAGGCTATAACATTAGGTAT	TAGTGGATTCCATTGTTGAT	AAGGCTATAACATTAGGTAT	A	31645
1133_D4	WT	MMS	XI	647916	647670	SNP	1	T	2	T/C	54.2/45.8	32/27	59	T	54.237	32	C	45.763	27	CAAACTACACTAGCTCTTTC	CATCGTCCAGTGAAGTCTGT	CAAACTACACTAGCTCTTTC	CATCGTCCAGTGAAGTCTGT	C	345566
1133_D4	WT	MMS	XII	468912	442953	SNP	1	C	2	C/A	53.8/46.2	2018-07-06	13	C	53.846	7	A	46.154	6	GTGTAGTGGGTGACCATACG	GAAACTCAGGTGCTGCAGTT	GTGTAGTGGGTGACCATACG	GAAACTCAGGTGCTGCAGTT	A
1133_D4	WT	MMS	XII	644438	596006	SNP	1	T	2	A/T	52.2/47.8	24/22	46	A	52.174	24	T	47.826	22	TTGTTGCTATCACAGTGGAT	GTGTTATTTGGGTATTTGGA	TTGTTGCTATCACAGTGGAT	GTGTTATTTGGGTATTTGGA	A	175526
1133_D4	WT	MMS	XIII	64327	59542	SNP	1	T	2	A/T	54.3/45.7	50/42	92	A	54.348	50	T	45.652	42	TATTTCTACAATCCTTGAGA	CAATTTGTATTTCTTAATCA	TATTTCTACAATCCTTGAGA	CAATTTGTATTTCTTAATCA	A
1133_D4	WT	MMS	XIII	384637	366459	SNP	1	C	2	T/C	50.9/49.1	28/27	55	T	50.909	28	C	49.091	27	ATTGTGGATGCATACGGTAT	GCAACATATAAAGAAATCAA	ATTGTGGATGCATACGGTAT	GCAACATATAAAGAAATCAA	T	320310
1133_D4	WT	MMS	XIV	240696	230772	SNP	1	C	2	C/G	53.8/46.2	35/30	65	C	53.846	35	G	46.154	30	CACAAGGATCAAGTCAAGTG	GTTTTGGGCAATCATGAAAT	CACAAGGATCAAGTCAAGTG	GTTTTGGGCAATCATGAAAT	G
1133_D4	WT	MMS	XIV	733800	722952	SNP	1	C	2	T/C	52.3/47.7	34/31	65	T	52.308	34	C	47.692	31	ATGTCGACATTAGGTTCGTA	TCCATGGCCTGGAGCGGAGA	ATGTCGACATTAGGTTCGTA	TCCATGGCCTGGAGCGGAGA	T	493104
1133_D4	WT	MMS	XV	46	46	SNP	1	A	2	C/A	50.9/49.1	28/27	55	C	50.909	28	A	49.091	27	CCCACACACCACACCCACAC	CACACACACACCACACCCAC	CCCACACACCACACCCACAC	CACACACACACCACACCCAC	C
1133_D4	WT	MMS	XV	605372	597505	SNP	1	G	2	G/A	54.5/45.5	24/20	44	G	54.545	24	A	45.455	20	AGCGTTCTTTTAATCTAGAT	CAACGGTACGTAAGTTCCCA	AGCGTTCTTTTAATCTAGAT	CAACGGTACGTAAGTTCCCA	A	605326
1133_D4	WT	MMS	XV	607168	599301	SNP	1	G	2	A/G	50.9/49.1	28/27	55	A	50.909	28	G	49.091	27	AGTGCTCCAATCAAGATTTG	AAATCACATTTTCTCCGGAA	AGTGCTCCAATCAAGATTTG	AAATCACATTTTCTCCGGAA	A	1796
1133_D4	WT	MMS	XV	686878	679011	SNP	1	A	2	G/A	53.6/46.4	37/32	69	G	53.623	37	A	46.377	32	AAAGTCTTTATTCAGAAAGA	AAATACAGTGGAGGGAATTA	AAAGTCTTTATTCAGAAAGA	AAATACAGTGGAGGGAATTA	G	79710
1133_D4	WT	MMS	XV	721678	712914	SNP	1	G	2	A/G	52.5/47.5	31/28	59	A	52.542	31	G	47.458	28	AGGAGTCACTGCCAGGTATC	TTTGAACACGGCATTAGTCA	AGGAGTCACTGCCAGGTATC	TTTGAACACGGCATTAGTCA	A	34800
1133_D4	WT	MMS	XV	934273	925507	SNP	1	A	2	T/A	53.0/47.0	44/39	83	T	53.012	44	A	46.988	39	AGGAGCAAAGCAAAATGGTG	GATGTTAGTATTTCCCCATA	AGGAGCAAAGCAAAATGGTG	GATGTTAGTATTTCCCCATA	T	212595
1133_D4	WT	MMS	XVI	173148	160342	SNP	1	C	2	T/C	51.4/48.6	36/34	70	T	51.429	36	C	48.571	34	TTACAAATCTCCATCAACGT	ATAATGTCCACTGAGTATGT	TTACAAATCTCCATCAACGT	ATAATGTCCACTGAGTATGT	T
1133_D4	WT	MMS	XVI	581579	564857	SNP	1	A	2	A/G	54.5/45.5	36/30	66	A	54.545	36	G	45.455	30	CTGATGCAGATTTATGAATA	TTTCATCACTCGATGTCATC	CTGATGCAGATTTATGAATA	TTTCATCACTCGATGTCATC	G	408431
1133_D4	WT	MMS	XVI	907577	880022	SNP	1	T	2	C/T	54.2/45.8	58/49	107	C	54.206	58	T	45.794	49	CAGGAAATCGTGATGGAACG	TGGCTTATCGAATTAGATAA	CAGGAAATCGTGATGGAACG	TGGCTTATCGAATTAGATAA	C	325998
1133_D4	WT	MMS	XIII	646856	628662	DIP	2	--	2	--/AT	51.8/48.2	29/27	56	--	51.786	29	AT	48.214	27	TGGACGCACGTTGTGTGTTC	ATATATATATATATATATAT	TGGACGCACGTTGTGTGTTC	ATATATATATATATATATAT	AT
1133_D4	WT	MMS	XV	92495	92441	DIP	1	A	2	-/A	54.1/45.9	33/28	61	-	54.098	33	A	45.902	28	GTTAGTAAATGATACAGTTT	AAAAAAATACTTTCATTAAC	GTTAGTAAATGATACAGTTT	AAAAAAATACTTTCATTAAC	-
1133_D5	WT	MMS	I	182611	179208	SNP	1	T	2	T/C	53.4/46.6	39/34	73	T	53.425	39	C	46.575	34	CGGCCAAGTTGCCAAAATTG	ATGTTATTTGTTGTATCTCA	CGGCCAAGTTGCCAAAATTG	ATGTTATTTGTTGTATCTCA	C
1133_D5	WT	MMS	III	8747	8747	SNP	1	G	2	G/A	53.8/46.2	42/36	78	G	53.846	42	A	46.154	36	GACAAGAATACTGTACCGTC	AAACTATCTCTTTTCAAACT	GACAAGAATACTGTACCGTC	AAACTATCTCTTTTCAAACT	A
1133_D5	WT	MMS	IV	733537	713110	SNP	1	G	2	G/T	50.6/49.4	41/40	81	G	50.617	41	T	49.383	40	GGGGGCGGTAGCCTTCCAAA	TCCAAGTGAACTTATGTTCG	GGGGGCGGTAGCCTTCCAAA	TCCAAGTGAACTTATGTTCG	T
1133_D5	WT	MMS	VI	20424	20089	SNP	1	A	2	A/G	51.9/48.1	54/50	104	A	51.923	54	G	48.077	50	TGCATATGAGAAAATATATG	TAATGACAATAATTTTCTTT	TGCATATGAGAAAATATATG	TAATGACAATAATTTTCTTT	G
1133_D5	WT	MMS	VIII	203537	197685	SNP	1	A	2	G/A	52.6/47.4	40/36	76	G	52.632	40	A	47.368	36	AGATCATAAAGTTTGAGGGC	CATCCCTCATGGTTTCAAAA	AGATCATAAAGTTTGAGGGC	CATCCCTCATGGTTTCAAAA	G
1133_D5	WT	MMS	VIII	486043	478296	SNP	1	T	2	C/T	50.5/48.5	50/48	99	C	50.505	50	T	48.485	48	AACTCCAATTTTCTTGAAAG	TAAAGAAAGATCCAGATACG	AACTCCAATTTTCTTGAAAG	TAAAGAAAGATCCAGATACG	C	282506
1133_D5	WT	MMS	XI	158144	158150	SNP	1	C	2	T/C	52.7/47.3	49/44	93	T	52.688	49	C	47.312	44	CGATCAAAGTTTGGCTCAAT	ACTGGACACTATTACTTCGA	CGATCAAAGTTTGGCTCAAT	ACTGGACACTATTACTTCGA	T
1133_D5	WT	MMS	XI	201326	201340	SNP	1	G	2	A/G	52.5/35.0	42/28	80	A	52.5	42	G	35	28	CCGGTAATTCTTGCGTCTCC	CTAACACTGGTGTCCACGAC	CCGGTAATTCTTGCGTCTCC	CTAACACTGGTGTCCACGAC	A	43182
1133_D5	WT	MMS	XI	209762	209776	SNP	1	T	2	T/A	54.8/45.2	46/38	84	T	54.762	46	A	45.238	38	AGTGTGAACTGGACAAATTC	TTCAAAGAATGGTCATTTCA	AGTGTGAACTGGACAAATTC	TTCAAAGAATGGTCATTTCA	A	8436
1133_D5	WT	MMS	XII	444361	433448	SNP	1	C	2	C/A	54.7/45.3	35/29	64	C	54.688	35	A	45.312	29	TATATTTGGAAAGAAACCCG	AAATATGAGCCCCCAGAAGA	TATATTTGGAAAGAAACCCG	AAATATGAGCCCCCAGAAGA	A
1133_D5	WT	MMS	XIII	23985	19324	SNP	1	G	2	A/G	52.9/47.1	54/48	102	A	52.941	54	G	47.059	48	GATAATAAGTTTATAAAAAT	TTTTTGTATTATTTGTTCTA	GATAATAAGTTTATAAAAAT	TTTTTGTATTATTTGTTCTA	A
1133_D5	WT	MMS	XIII	175699	171040	SNP	1	T	2	T/A	53.8/46.3	43/37	80	T	53.75	43	A	46.25	37	ACTCTGCCAATATTTAAGCG	CCTGAGCTCGATATTGAACA	ACTCTGCCAATATTTAAGCG	CCTGAGCTCGATATTGAACA	A	151714
1133_D5	WT	MMS	XIII	548986	531022	SNP	1	C	2	C/T	52.7/47.3	49/44	93	C	52.688	49	T	47.312	44	TAAGTAATAGGTTGATCGAT	CAAGCCATAGCAGAAGGAGA	TAAGTAATAGGTTGATCGAT	CAAGCCATAGCACAAGGAGA	T	373287
1133_D5	WT	MMS	XIV	56863	51219	SNP	1	T	2	T/A	53.7/46.3	51/44	95	T	53.684	51	A	46.316	44	TCTTGACCTTGAAATATGGC	TTGCCGATAAGCATCTCGCC	TCTTGACCTTGAAATATGGC	TTGCCGATAAGCATCTCGCC	A
1133_D5	WT	MMS	XV	339866	336469	SNP	1	T	2	C/T	50.0/50.0	44/44	88	C	50	44	T	50	44	CAAAGGCTTCAGAGATACAG	CCATAGCAACATTTAAAGAA	CAAAGGCTTCAGAGATACAG	CCATAGCAACATTTAAAGAA	C
1133_D5	WT	MMS	XVI	158396	145387	SNP	1	T	2	T/C	53.3/46.7	48/42	90	T	53.333	48	C	46.667	42	GAGGCTTTGTATGAGAAGAT	TTGAAGATAACAGAACTTCA	GAGGCTTTGTATGAGAAGAT	TTGAAGATAACAGAACTTCA	C
1133_D5	WT	MMS	XVI	428777	415768	SNP	1	C	2	T/C	51.3/48.7	40/38	78	T	51.282	40	C	48.718	38	AACATTGCCAAAGTTTCCCG	TCTCTTTTATCCATTGGTTC	AACATTGCCAAAGTTTCCCG	TCTCTTTTATCCATTGGTTC	T	270381
1133_D5	WT	MMS	XVI	640455	623523	SNP	1	G	2	T/G	54.2/45.8	32/27	59	T	54.237	32	G	45.763	27	AGGAGTGCTACCAATTCGCA	AGTATCTCTTCAAACCTCAA	AGGAGTGCTACCAATTCGCA	AGTATCTCTTCAAACCTCAA	T	211678
1133_D5	WT	MMS	XIV	46224	40580	DIP	1	-	2	-/T	54.3/45.7	50/42	92	-	54.348	50	T	45.652	42	AGTAATACTTTGCAAGGGAA	TTTTTTGCGTTGACGTATTT	AGTAATACTTTGCAAGGGAA	TTTTTGCGTTGACGTATTTT	T
1133_D6	WT	MMS	I	147438	146409	SNP	1	C	2	T/C	53.3/46.7	32/28	60	T	53.333	32	C	46.667	28	ATATTCAAATGTCACCATGG	TTTCACCAGACTTGCCTCGA	ATATTCAAATGTCACCATGG	TTTCACCAGACTTGCCTCGA	T
1133_D6	WT	MMS	II	451974	442662	SNP	1	C	2	C/G	52.5/47.5	31/28	59	C	52.542	31	G	47.458	28	TAGGATTATTGATCATGACT	AAGCTTGCGATATGTGTTGG	TAGGATTATTGATCATGACT	AAGCTTGCGATATGTGTTGG	G
1133_D6	WT	MMS	III	286573	280257	SNP	1	T	2	T/A	51.3/47.5	41/38	80	T	51.25	41	A	47.5	38	TCGATTAACTTTTCTTACTG	ATATGGGTCGCTTTCACTTT	TCGATTAACTTTTCTTACTG	ATATGGGTCGCTTTCACTTT	A
1133_D6	WT	MMS	IV	168877	162111	SNP	1	A	2	T/A	50.6/49.4	40/39	79	T	50.633	40	A	49.367	39	CAACATACGAAGACAGGAAC	TTCATCAATTCTCAAGGAAC	CAACATACGAAGACAGGAAC	TTCATCAATTCTCAAGGAAC	T
1133_D6	WT	MMS	IV	265430	258649	SNP	1	T	2	C/T	50.8/49.2	32/31	63	C	50.794	32	T	49.206	31	TATCTTCCTCAGCAAACTGT	TATCTTGCATTGGTGAGGCG	TATCTTCCTCAGCAAACTGT	TATCTTGCATTGGTGAGGCG	C	96553
1133_D6	WT	MMS	IV	520950	512477	SNP	1	A	2	T/A	52.6/47.4	30/27	57	T	52.632	30	A	47.368	27	GTTCAAGAAGGTACGAAAGA	GGTTCCAATCGTCCATTTTA	GTTCAAGAAGGTACGAAAGA	GGTTCCAATCGTCCATTTTA	T	255520
1133_D6	WT	MMS	IV	699766	678449	SNP	1	T	2	C/T	52.3/47.7	34/31	65	C	52.308	34	T	47.692	31	AAAAGGCGCAGGAAGTGCAG	AGTGACCGGCAAGCAGCATG	AAAAGGCGCAGGAAGTGCAG	AGTGACCGGCAAGCAGCATG	C	178816
1133_D6	WT	MMS	IV	891450	868527	SNP	1	A	2	A/T	51.2/48.8	42/40	82	A	51.22	42	T	48.78	40	ACAGACAGAGAATGAAGACG	TGCATCGCGGCAAGACATGA	ACAGACAGAGAATGAAGACG	TGCATCGCGGCAAGACATGA	T	191684
1133_D6	WT	MMS	IV	1206359	1172942	SNP	1	C	2	C/T	50.0/50.0	36/36	72	C	50	36	T	50	36	AAACCTAGCATCTACACCTT	CTTCTTTGGGTTCTCTCCAG	AAACCTAGCATCTACACCTT	CTTCTTTGGGTTCTCTCCAG	T	314909
1133_D6	WT	MMS	V	125344	125340	SNP	1	T	2	T/C	50.7/49.3	36/35	71	T	50.704	36	C	49.296	35	TAATTTTCAACAAGTTTCTT	TTTGCAGGCCTTCAATCAAA	TAATTTTCAACAAGTTTCTT	TTTGCAGGCCTTCAATCAAA	C
1133_D6	WT	MMS	V	338426	338414	SNP	1	G	2	T/G	51.4/48.6	36/34	70	T	51.429	36	G	48.571	34	AGGCATATTTAATGCTTTGT	ATACCATTATTGCCTTTGAT	AGGCATATTTAATGCTTTGT	ATACCATTATTGCCTTTGAT	T	213082
1133_D6	WT	MMS	V	422175	422120	SNP	1	T	2	A/T	54.5/45.5	42/35	77	A	54.545	42	T	45.455	35	TACCGTTTTCGGTACGATAG	CGGATATCGAAAGCCTTCTC	TACCGTTTTCGGTACGATAG	CGGATATCGAAAGCCTTCTC	A	83749
1133_D6	WT	MMS	V	490564	485612	SNP	1	A	2	A/G	52.5/47.5	42/38	80	A	52.5	42	G	47.5	38	AAACTCCTCCTCGAGGAAGA	CCCTGCTGTAACATGCTGAT	AAACTCCTCCTCGAGGAAGA	CCCTGCTGTAACATGCTGAT	G	68389
1133_D6	WT	MMS	VII	184697	178343	SNP	1	T	2	T/C	53.3/46.7	40/35	75	T	53.333	40	C	46.667	35	TTTCTTGCATATGAAAGAAG	TTAAATCATTCAAAAGTTCC	TTTCTTGCATATGAAAGAAG	TTAAATCATTCAAAAGTTCC	C
1133_D6	WT	MMS	VIII	123112	116976	SNP	1	G	2	G/A	53.4/46.6	39/34	73	G	53.425	39	A	46.575	34	AGAGGTTTTTCACAATGAAG	CCCATCCGGAGCCCTGCACG	AGAGGTTTTTCACAATGAAG	CCCATCCGGAGCCCTGCACG	A
1133_D6	WT	MMS	VIII	556473	541700	SNP	1	T	2	T/A	52.6/46.2	41/36	78	T	52.564	41	A	46.154	36	TATATACTGTAGCATCCGTG	GCGTATGCCATAGGATAATT	TATATACTGTAGCATCCGTG	GCGTATGCCATAGGATAATT	A	433361
1133_D6	WT	MMS	IX	152320	135508	SNP	1	A	2	T/A	50.8/49.2	32/31	63	T	50.794	32	A	49.206	31	GACCAACTTGATGCAACAAC	AGTTCCATGTTTAATAACGA	GACCAACTTGATGCAACAAC	AGTTCCATGTTTAATAACGA	T
1133_D6	WT	MMS	IX	210643	193831	SNP	1	C	2	C/T	52.3/47.7	34/31	65	C	52.308	34	T	47.692	31	TATTACTCGAGCCCGTAATA	AACAGAACATATGAAATATC	TATTACTCGAGCCCGTAATA	AACAGAACATATGAAATATC	T	58323
1133_D6	WT	MMS	IX	373943	357132	SNP	1	T	2	T/A	51.7/48.3	30/28	58	T	51.724	30	A	48.276	28	TTGGGCTCCGGAGCAACACG	TCTGAAGGCATCGTAATCAT	TTGGGCTCCGGAGCAACACG	TCTGAAGGCATCGTAATCAT	A	163300
1133_D6	WT	MMS	X	114869	100722	SNP	1	T	2	T/C	52.5/47.5	32/29	61	T	52.459	32	C	47.541	29	TAGACTTCGACGTCATTCCA	AATGTTGCTGCTGTTGCTGT	TAGACTTCGACGTCATTCCA	AATGTTGCTGCTGTTGCTGT	C
1133_D6	WT	MMS	X	295736	281590	SNP	1	C	2	T/C	53.7/46.3	44/38	82	T	53.659	44	C	46.341	38	AAACGATCCAAGTTGAACAA	GGGTCGCCCCAGTCGGTGCA	AAACGATCCAAGTTGAACAA	GGGTCGCCCCAGTCGGTGCA	T	180867
1133_D6	WT	MMS	X	630897	610706	SNP	1	C	2	A/C	51.9/48.1	42/39	81	A	51.852	42	C	48.148	39	CAATATCGTTTGGATTGGTA	CCATTATATTACAGCCGTTA	CAATATCGTTTGGATTGGTA	CCATTATATTACAGCCGTTA	A	335161
1133_D6	WT	MMS	XI	212106	212122	SNP	1	A	2	G/A	51.9/48.1	28/26	54	G	51.852	28	A	48.148	26	CCACGACAGTCTTGAAACCG	CGATAACAACACCGATAACA	CCACGACAGTCTTGAAACCG	CGATAACAACACCGATAACA	G
1133_D6	WT	MMS	XII	12337	5039	SNP	1	G	2	C/G	50.0/50.0	22/22	44	C	50	22	G	50	22	TAACCGCAATATCCTAAAAG	ATAACTGATGCATCTTTAAT	TAACCGCAATATCCTAAAAG	ATAACTGATGCATCTTTAAT	C
1133_D6	WT	MMS	XII	797322	745138	SNP	1	C	2	C/A	53.2/46.8	33/29	62	C	53.226	33	A	46.774	29	AGCATCGTGTGGTAAACAAG	TTCCACCGAATGAGCTTAAG	AGCATCGTGTGGTAAACAAG	TTCCACCGAATGAGCTTAAG	A	784985
1133_D6	WT	MMS	XIII	136467	131295	SNP	1	A	2	G/A	51.4/48.6	37/35	72	G	51.389	37	A	48.611	35	TGTCTTACAATTTCAGAAAG	TGAGGAAACAGAAGTGCAAT	TGTCTTACAATTTCAGAAAG	TGAGGAAACAGAAGTGCAAT	G
1133_D6	WT	MMS	XIII	653453	634585	SNP	1	C	2	C/T	50.7/49.3	37/36	73	C	50.685	37	T	49.315	36	CTGTGCCCTTTGCCAGCATA	GTGTTACCCCCCTCAAAAAG	CTGTGCCCTTTGCCAGCATA	GTGTTACCCCCCTCAAAAAG	T	516986
1133_D6	WT	MMS	XIII	719132	700263	SNP	1	C	2	G/C	50.7/49.3	36/35	71	G	50.704	36	C	49.296	35	TTTCATTTCCTCTGCATCAT	TGTTCTCAGAAATTCTTCAT	TTTCATTTCCTCTGCATCAT	TGTTCTCAGAAATTCTTCAT	G	65679
1133_D6	WT	MMS	XIII	760368	741499	SNP	1	G	2	A/G	54.5/45.5	36/30	66	A	54.545	36	G	45.455	30	ACCAGCTGTTGTCCAAATTA	CAGTTCCTTTGAAAACCGCC	ACCAGCTGTTGTCCAAATTA	CAGTTCCTTTGAAAACCGCC	A	41236
1133_D6	WT	MMS	XIII	802231	783360	SNP	1	G	2	G/A	55.0/45.0	33/27	60	G	55	33	A	45	27	TGGCTTTGAAAGGTGACAAT	ATCCTCTTGATTGTTGCGAA	TGGCTTTGAAAGGTGACAAT	ATCCTCTTGATTGTTGCGAA	A	41863
1133_D6	WT	MMS	XIII	860054	841183	SNP	1	G	2	C/G	51.7/48.3	31/29	60	C	51.667	31	G	48.333	29	TTTTCTTGGAATGGCGGGCA	TTTCTCAAGTTTCTCCTGTT	TTTTCTTGGAATGGCGGGCA	TTTCTCAAGTTTCTCCTGTT	C	57823
1133_D6	WT	MMS	XIII	907392	888514	SNP	1	C	2	A/C	51.3/48.7	40/38	78	A	51.282	40	C	48.718	38	ATCTGGTTCAAAATCGACCA	AGCCACTACCACATCGCATA	ATCTGGTTCAAAATCGACCA	AGCCACTACCACATCGCATA	A	47338
1133_D6	WT	MMS	XIV	200952	191228	SNP	1	A	2	G/A	53.8/46.2	35/30	65	G	53.846	35	A	46.154	30	GCTGATCAAGACATCGACTC	CGTCTCGTGCAATACTTGTT	GCTGATCAAGACATCGACTC	CGTCTCGTGCAATACTTGTT	G
1133_D6	WT	MMS	XIV	233737	224013	SNP	1	T	2	T/A	50.7/49.3	34/33	67	T	50.746	34	A	49.254	33	TTCTCACCTTTCTTGCCAAA	GTTCAAGTGGCAGGCTGCTC	TTCTCACCTTTCTTGCCAAA	GTTCAAGTGGCAGGCTGCTC	A	32785
1133_D6	WT	MMS	XIV	547281	537541	SNP	1	G	2	A/G	53.3/46.7	32/28	60	A	53.333	32	G	46.667	28	GCTTCTCCAAGCTGAAAGAA	TAAACTCACTCTATGTACGT	GCTTCTCCAAGCTGAAAGAA	TAAACTCACTCTATGTACGT	A	313544
1133_D6	WT	MMS	XIV	611417	600737	SNP	1	A	2	T/A	50.6/49.4	45/44	89	T	50.562	45	A	49.438	44	ATGATTCATTTTTGCCAATT	TAATTTATCATGCCAATGCG	ATGATTCATTTTTGCCAATT	TAATTTATCATGCCAATGCG	T	64136
1133_D6	WT	MMS	XIV	688646	677966	SNP	1	A	2	T/A	51.5/48.5	35/33	68	T	51.471	35	A	48.529	33	ATTATGGAGCTATGAAAAAG	CTACAGTTCATTATTGGCAA	ATTATGGAGCTATGAAAAAG	CTACAGTTCATTATTGGCAA	T	77229
1133_D6	WT	MMS	XIV	748873	738198	SNP	1	A	2	A/T	55.0/45.0	33/27	60	A	55	33	T	45	27	GGTAGTAGGTTTACCCTTCA	AACAACATAGATCGTAAAAA	GGTAGCAGGTTTACCCTTCA	AACAACATAGAGCGTAAAAA	T	60227
1133_D6	WT	MMS	XV	547247	543865	SNP	1	C	2	C/T	51.7/48.3	31/29	60	C	51.667	31	T	48.333	29	AAACCAAGTCCTATGATCAA	TAAAACTGCTGTTTATCTCT	AAACCAAGTCCTATGATCAA	TAAAACTGCTGTTTATCTCT	T
1133_D6	WT	MMS	XV	547680	544298	SNP	1	T	2	A/T	52.4/47.6	22/20	42	A	52.381	22	T	47.619	20	TTTTTATTTGCAGCACGATT	AGTTGATCATGACACAAACT	TTTTTATTTGCAGCACGATT	AGTTGATCATGACACAAACT	A	433
1133_D6	WT	MMS	XV	557627	554245	SNP	1	C	2	C/G	54.9/45.1	45/37	82	C	54.878	45	G	45.122	37	TTTCCTCATCGATTTCTGAG	TTGCTTGAAATCCATACTTG	TTTCCTCATCGATTTCCGAG	TTGCTTGAAATCCATACTTG	G	9947
1133_D6	WT	MMS	XV	633060	625199	SNP	1	A	2	G/A	53.1/46.9	34/30	64	G	53.125	34	A	46.875	30	AATAAAATTGATTCCAAATT	AACCCCACCTCTAATGGAGC	AATAAAATTGATTCCAAATT	AACCCCACCTCTAATGGAGC	G	75433
1133_D6	WT	MMS	XV	655204	647343	SNP	1	T	2	A/T	54.3/45.7	38/32	70	A	54.286	38	T	45.714	32	GTGTGGAGACGATTCGCATA	GATTAGTCTAGTTGACTTAT	GTGTGGAGACGATTCGCATA	GATTAGTCTAGTTGACTTAT	A	22144
1133_D6	WT	MMS	XVI	110709	97544	SNP	1	T	2	C/T	52.6/47.4	40/36	76	C	52.632	40	T	47.368	36	ATCACTGGTGCTGGTAAGGG	TCTATTGGTGCTGAAGTCTT	ATCACTGGTGCTGGTAAGGG	TCTATTGGTGCTGAAGTCTT	C
1133_D6	WT	MMS	XVI	125382	112217	SNP	1	T	2	T/A	51.8/48.2	43/40	83	T	51.807	43	A	48.193	40	CTACTGGCTAGTGTTTTATC	TCGCTAACTTCGTTTGTTTC	CTACTGGCTAGTGTTTTATC	TCGCTAACTTCGTTTGTTTC	A	14673
1133_D6	WT	MMS	VII	211953	205599	DIP	1	A	2	-/A	53.4/46.6	31/27	58	-	53.448	31	A	46.552	27	ACCAACTGAGGAAATGCTGC	AAAAATGAGGCGTATTAGAT	ACCAACTGAGGAAATGCTGC	AAAAATGAGGCGTATTAGAT	-
1133_D7	WT	MMS	II	562503	552554	SNP	1	C	2	A/C	53.7/46.3	29/25	54	A	53.704	29	C	46.296	25	TTTGGCTTTTTCATATTATA	GGTGAATTTACATTTTATAC	TTTGGCTTTTTCATATTATA	GGTGAATTTACATTTTATAC	A
1133_D7	WT	MMS	II	579518	569569	SNP	1	T	2	C/T	54.8/45.2	34/28	62	C	54.839	34	T	45.161	28	GGTAGTAGAAGTTGTGCTAG	TTTTGCCGTTAATGAAGAAT	GGTAGTAGAAGTTGTGCTAG	TTTTGCCGTTAATGAAGAAT	C	17015
1133_D7	WT	MMS	II	681891	671569	SNP	1	C	2	A/C	51.7/48.3	30/28	58	A	51.724	30	C	48.276	28	AAAAAAAAAACAAGTAGAAA	AAAATGAATAAATCTGATAA	AAAAAAAAAACAAGTAGAAA	AAAATGAATAAATCTGATAA	A	102373
1133_D7	WT	MMS	III	26276	25480	SNP	1	G	2	T/G	54.8/45.2	46/38	84	T	54.762	46	G	45.238	38	GTGACCTTTTTCCATGAATT	GGCCATGGTATCCATGACCT	GTGACCTTTTTCCATGAATT	GGCCATGGTATCCATGACCT	T
1133_D7	WT	MMS	IV	162110	155284	SNP	1	G	2	G/A	54.2/45.8	39/33	72	G	54.167	39	A	45.833	33	TCTTGGTTTGTTTTTACTTT	AGGGAAAGGCGATAAAATTT	TCTTGGTTTGTTTTTACTTT	AGGGAAAGGCGATAAAATTT	A
1133_D7	WT	MMS	IV	357943	351107	SNP	1	A	2	G/A	54.7/45.3	35/29	64	G	54.688	35	A	45.312	29	TGGTACTACTAATTATTAAC	TAGTTCGTTGTATACACACT	TGGTACTACTAATTATTAAC	TAGTTCGTTGTATACACACT	G	195833
1133_D7	WT	MMS	IV	446443	438818	SNP	1	C	2	C/G	54.4/45.6	31/26	57	C	54.386	31	G	45.614	26	AAGCTGATGCATATATAGAT	AAAGACTTTAATTTATAAAA	AAGCTGATGCATATATAGAT	AAAGACTTTAATTTATAAAA	G	88500
1133_D7	WT	MMS	IV	563655	547966	SNP	1	T	2	C/T	50.8/49.2	33/32	65	C	50.769	33	T	49.231	32	GCCACGGCCACAGCTCAGAG	GACTTAGATAAATATAGCCG	GCCACGGCCACAGCTCAGAG	GACTTAGATAAATATAGCCG	C	117212
1133_D7	WT	MMS	V	66451	66450	SNP	1	C	2	T/C	52.6/47.4	51/46	97	T	52.577	51	C	47.423	46	TTCTTGCCACAGAGTGGCCA	CCAATTGAGCCAATAGGTCC	TTCTTGCCACAGAGTGGCCA	CCAATTGAGCCAATAGGTCC	T
1133_D7	WT	MMS	VI	31916	31505	SNP	1	G	2	G/C	53.8/46.3	43/37	80	G	53.75	43	C	46.25	37	CTCTTTTTCATATTCTCTAC	CTAGCACTGTAAGGAAAAAC	CTCTTTTTCATATTCTCTAC	CTAGCACTGTAAGGAAAAAC	C
1133_D7	WT	MMS	VII	31984	25590	SNP	1	A	2	T/A	50.9/49.1	29/28	57	T	50.877	29	A	49.123	28	TTGGATGAGGGCGATGAAGA	GACCTTTTGGAGTATGATGA	TTGGATGAGGGCGATGAAGA	GACCTTTTGGAGTATGATGA	T
1133_D7	WT	MMS	VII	232221	225829	SNP	1	T	2	T/C	52.5/47.5	31/28	59	T	52.542	31	C	47.458	28	TGATCCAAACAATCAGCAGT	TTTAAACCCAGAATACATTA	TGATCCAAACAATCAGCAGT	TTTAAACCCAGAATACATTA	C	200237
1133_D7	WT	MMS	VII	701696	685925	SNP	1	G	2	T/G	51.4/48.6	36/34	70	T	51.429	36	G	48.571	34	CGACGGCACTACAAAGGAGC	CGTAACAAACGTTACTATCC	CGACGGCACTACAAAGGAGC	CGTAACAAACGTTACTATCC	T	469475
1133_D7	WT	MMS	VII	729034	712438	SNP	1	T	2	C/T	50.0/50.0	34/34	68	C	50	34	T	50	34	CACCTCCCCCAAGGGTATTG	TATTCTGGGTGCCGCTTCCA	CACCTCCCCCAAGGGTATTG	TATTCTGGGTGCCGCTTCCA	C	27338
1133_D7	WT	MMS	IX	43023	26613	SNP	1	C	2	C/A	50.7/49.3	38/37	75	C	50.667	38	A	49.333	37	ATTCAAATCCAAAGAATCTG	GATATTTGACTCGATGATAA	ATTCAAATCCAAAGAATCTG	GATATTTGACTCGATGATAA	A
1133_D7	WT	MMS	IX	197564	181158	SNP	1	T	2	T/C	52.5/47.5	32/29	61	T	52.459	32	C	47.541	29	TTTACTGATATGGTAACATG	TTTTCTATTCAAATCAAGCT	TTTACTGATATGGTAACATG	TTTTCTATTCAAATCAAGCT	C	154541
1133_D7	WT	MMS	IX	300732	284326	SNP	1	T	2	C/T	52.4/47.6	44/40	84	C	52.381	44	T	47.619	40	GAATTTCATTCCAACAGCTT	AGTCTGTTTTAATAAACGCA	GAATTTCATTCCAACAGCTT	AGTCTGTTTTAATAAACGCA	C	103168
1133_D7	WT	MMS	XIII	269776	255337	SNP	1	G	2	A/G	50.8/49.2	30/29	59	A	50.847	30	G	49.153	29	TTAATTCTTTTCTCAAAACG	CCTGTTGTGCTCTACGTATC	TTAATTCTTTTCTCAAAACG	CCTGTTGTGCTCTACGTATC	A
1133_D7	WT	MMS	XIV	43217	37586	SNP	1	G	2	G/T	53.2/46.8	33/29	62	G	53.226	33	T	46.774	29	AGAGTCATGCTGATAACTGT	TAAAGAAACTGTACGCTTGT	AGAGTCATGCTGATAACTGT	TAAAGAAACTGTACGCTTGT	T
1133_D7	WT	MMS	XIV	300838	291236	SNP	1	C	2	A/C	51.5/48.5	17/16	33	A	51.515	17	C	48.485	16	TCAAGGATCGTGCTTTTGTT	GTTGGTGGATCGGCCGTACG	TCAAGGATCGTGCTTTTGTT	GTTGGTGGATCGGCCGTACG	A	257621
1133_D7	WT	MMS	XIV	435293	425688	SNP	1	A	2	A/G	52.9/47.1	36/32	68	A	52.941	36	G	47.059	32	ACTACTTGAACAGTAGCAAA	GAAGTTCCGTCTCTCATGGA	ACTACTTGAACAGTAGCAAA	GAAGTTCCGTCTCTCATGGA	G	134455
1133_D7	WT	MMS	XV	551881	548412	SNP	1	A	2	A/T	50.6/49.4	41/40	81	A	50.617	41	T	49.383	40	GTTATTAGCTGGCACGTCCA	AGAGGTTATGTTGTCTTGCC	GTTATTAGCTGGCACGTCCA	AGAGGTTATGTTGTCTTGCC	T
1133_D7	WT	MMS	XV	644577	636641	SNP	1	A	2	G/A	50.7/49.3	38/37	75	G	50.667	38	A	49.333	37	ACTTTAGTCATGGCTGATAG	CCTGCTATTCAGTTGATAGA	ACTTTAGTCATGGCTGATAG	CCTGCTATTCAGTTGATAGA	G	92696
1133_D7	WT	MMS	XVI	250540	237469	SNP	1	G	2	A/G	54.3/45.7	44/37	81	A	54.321	44	G	45.679	37	TGCAAATATCTGGGTTTGAG	GCTATTTGACTAGTCTAGAG	TGCAAATATCTGGGTTTGAG	GCTATTTGACTAGTCTAGAG	A
1133_D7	WT	MMS	XVI	621850	604829	SNP	1	C	2	C/G	53.1/46.9	34/30	64	C	53.125	34	G	46.875	30	TCCTGAGAAAATGCCCAGCT	ATAAACATCGGTAGTCCAAT	TCCTGAGAAAATGCCCAGCT	ATAAACATCGGTAGTCCAAT	G	371310
1133_D7	WT	MMS	II	37030	35035	DIP	1	-	2	-/A	53.7/46.3	36/31	67	-	53.731	36	A	46.269	31	AGAACAGTAACAAAATAAAT	AAAAAAAACACGCACATATA	AGAACAGTAACAAAATAAAT	AAAAAAACACGCACATATAA	A
1133_D7	WT	MMS	IV	136780	129955	DIP	1	C	2	-/C	51.8/48.2	43/40	83	-	51.807	43	C	48.193	40	GATACGGGTGATTTGAGTTT	CCCATAGACGAAGAACAGCC	GATACGGGTGATTTGAGTTT	CCCATAGACGAAGAACAGCC	-
1133_D8	WT	MMS	II	342906	333619	SNP	1	C	2	C/T	50.0/50.0	18/18	36	C	50	18	T	50	18	AACTTACCATAATTTTTTTT	TAAAAACCCTTTTTTACTCA	AACTTACCATAATTTTTTTT	TAAAAACCCTTTTTTACTCA	T
1133_D8	WT	MMS	II	663891	653498	SNP	1	T	2	T/A	54.8/45.2	23/19	42	T	54.762	23	A	45.238	19	ACCGTCGTCATACTCAATAC	TATCGGCTTTGACCCTCCGT	ACCGTCGTCATACTCAATAC	TATCGGCTTTGACCCTCCGT	A	320985
1133_D8	WT	MMS	IV	186581	179604	SNP	1	T	2	A/T	51.4/48.6	19/18	37	A	51.351	19	T	48.649	18	CACCATTTCTGGTCACATAC	TTGTTTTGCTTTATTTTTTC	CACCATTTCTGGTCACATAC	TTGTTTTGCTTTATTTTTTC	A
1133_D8	WT	MMS	IV	390860	383479	SNP	1	C	2	C/T	53.8/46.2	28/24	52	C	53.846	28	T	46.154	24	ATCTGGCTGTTCAGACATTG	ATATTTGGACATATCGAGTG	ATCTGGCTGTTCAGACATTG	ATATTTGGACATATCGAGTG	T	204279
1133_D8	WT	MMS	IV	593654	578007	SNP	1	A	2	A/G	50.8/49.2	33/32	65	A	50.769	33	G	49.231	32	TTCTCATTTTCTTTGGGACA	TACGCCTTTAACCCCCCATT	TTCTCATTTTCTTTGGGACA	TACGCCTTTAACCCCCCATT	G	202794
1133_D8	WT	MMS	IV	597069	581422	SNP	1	C	2	T/C	50.8/49.2	33/32	65	T	50.769	33	C	49.231	32	CAGCTTTTTCTTTTGCAATT	AGGACACTTTAACTTGTAGT	CAGCTTTTTCTTTTGCAATT	AGGACACTTTAACTTGTAGT	T	3415
1133_D8	WT	MMS	IV	725515	704081	SNP	1	A	2	A/G	51.1/48.9	24/23	47	A	51.064	24	G	48.936	23	AAACCTTTAACCCTGAATAG	TCACCTAACATGCATGACAA	AAACCTTTAACCCTGAATAG	TCACCTAACATGCATGACAA	G	128446
1133_D8	WT	MMS	IV	1456991	1417896	SNP	1	C	2	C/A	51.4/48.6	36/34	70	C	51.429	36	A	48.571	34	TTTTATCAAGTCTCTAAAAT	ATTTCTCTCCTCACAAACGT	TTTTATCAAGTCTCTAAAAT	ATTTCTCTCCTCACAAACGT	A	731476
1133_D8	WT	MMS	V	96031	95991	SNP	1	G	2	C/G	53.7/46.3	29/25	54	C	53.704	29	G	46.296	25	GGAAGTTAAAGTTTTCCAAG	TGAGAGGGAGTTAGTCAAGG	GGAAGTTAAAGTTTTCCAAG	TGAGAGGGAGTTAGTCAAGG	C
1133_D8	WT	MMS	VI	74940	74533	SNP	1	C	2	C/T	50.7/49.3	34/33	67	C	50.746	34	T	49.254	33	AGTCGCAAATATACATCGTA	CGAGTGATGAACGTGGTTTT	AGTCGCAAATATACATCGTA	CGAGTGATGAACGTGGTTTT	T
1133_D8	WT	MMS	VI	202746	197443	SNP	1	T	2	T/C	53.1/46.9	26/23	49	T	53.061	26	C	46.939	23	TCAACTGCTGGAGGCGGTCT	ATCCTACCAGACAAAATCAT	TCAACGGCTGGAGGCGGTCT	ATCCTACCAGACAAAATCAT	C	127806
1133_D8	WT	MMS	VII	54792	48249	SNP	1	T	2	C/T	54.5/45.5	30/25	55	C	54.545	30	T	45.455	25	AAACCTTCTGGTTCCAACCA	ATCTTATGGGAAGATCTATC	AAACCTTCTGGTTCCAACCA	ATCTTATGGGAAGATCTATC	C
1133_D8	WT	MMS	VII	108684	102143	SNP	1	C	2	C/T	51.2/48.8	22/21	43	C	51.163	22	T	48.837	21	TTGGTTGCAGGAGAGAGGTG	CACTTTGATGAAAGGTATAT	TTGGTTGCAGGAGAGAGGTG	CACTTTGATGAAAGGTATAT	T	53892
1133_D8	WT	MMS	VII	338643	332091	SNP	1	A	2	G/A	52.5/47.5	32/29	61	G	52.459	32	A	47.541	29	GCAGTGGCTGACATGCCAAG	TCTATTACGTCTTCTCTATC	GCAGTGGCTGACATGCCAAG	TCTATTACGTCTTCTCTATC	G	229959
1133_D8	WT	MMS	VII	680084	663919	SNP	1	C	2	C/A	53.7/46.3	29/25	54	C	53.704	29	A	46.296	25	CCAACGATCCTATACCACCA	CAAGAAAAGTTTCCGACGTT	CCAACGATCCTATACCACCA	GAAGAAAAGCTTCCGACGTT	A	341441
1133_D8	WT	MMS	VII	693019	676853	SNP	1	C	2	C/T	50.9/49.1	29/28	57	C	50.877	29	T	49.123	28	AATGAAACTAGCACTAAAGC	ATACAAGAAAGGTCTTTTGA	AATGAAACTAGCACTAAAGC	ATACAAGAAAGGTCTTTTGA	T	12935
1133_D8	WT	MMS	VII	693483	677317	SNP	1	A	2	G/A	51.6/48.4	32/30	62	G	51.613	32	A	48.387	30	ATATTGGAAGATCCCAGAGC	CGTCGATACTCAAAAATGCT	ATATTGGAAGATCCCAGAGC	CGTCGATACTCAAAAATGCT	G	464
1133_D8	WT	MMS	VII	748311	731119	SNP	1	G	2	C/G	52.6/47.4	30/27	57	C	52.632	30	G	47.368	27	TCTTCATTTCTTGTTTAATA	AGTCTCTGGTGAAATCCTGC	TCTTCATTTCTTGTTTAATG	AGTCTCTGGTGAAATCCTGC	C	54828
1133_D8	WT	MMS	IX	377452	360776	SNP	1	T	2	G/T	50.0/50.0	29/29	58	G	50	29	T	50	29	TTGAACAGCTGGAGTGGGCG	TCCAATAACCCATTTGAATG	TTGAACAGCTGGAGTGGGCG	TCCAATAACCCATTTGAATG	G		Complex
1133_D8	WT	MMS	IX	377456	360780	SNP	1	A	2	A/C	50.0/50.0	29/29	58	A	50	29	C	50	29	ACAGCTGGAGTGGGCGTTCC	ATAACCCATTTGAATGTTCA	ACAGCTGGAGTGGGCGGTCC	ATAACCCATTTGAATGTTCA	C	4	Complex
1133_D8	WT	MMS	X	154257	140213	SNP	1	A	2	A/G	51.9/48.1	14/13	27	A	51.852	14	G	48.148	13	TCAAAAACACGACCTGGAGT	CCAACGACGATTTGAGCATC	TCAAAAACACGACCTGGAGT	CCAACGACGATTTGAGCATC	G
1133_D8	WT	MMS	X	339724	325682	SNP	1	C	2	C/G	52.9/47.1	27/24	51	C	52.941	27	G	47.059	24	ATCAGAACAAGAAAGCATTT	CAAAGTAATTGCATTTGCCC	ATCAGAACAAGAAAGCATTT	CAAAGTAATTGCATTTGCCC	G	185467
1133_D8	WT	MMS	X	524444	504267	SNP	1	T	2	T/A	51.8/46.4	29/26	56	T	51.786	29	A	46.429	26	GAATGCTGTCACTGCGCATA	AAAGGCGAGAACGATAGTGA	GAATGCTGTCACTGCGCATA	AAAGGCGAGAACGATAGTGA	A	184720
1133_D8	WT	MMS	XIII	720809	702348	SNP	1	T	2	A/T	53.2/46.8	25/22	47	A	53.191	25	T	46.809	22	TTGGCCATACTATTTAAACC	TAAGTCAGTTTGGTTGGGTA	TTGGCCATACTATTTAAACC	TAAGTCAGTTTGGTTGGGTA	A
1133_D8	WT	MMS	XIV	125768	115705	SNP	1	A	2	A/T	50.0/50.0	26/26	52	A	50	26	T	50	26	AATGAACAAGATGGATGGGA	GGAGACGATGATTATGATTA	AATGAACAAGATGGATGGGA	GGAGACGATGATTATGATTA	T
1133_D8	WT	MMS	XIV	500078	490001	SNP	1	C	2	C/T	50.0/50.0	16/16	32	C	50	16	T	50	16	CCCAGTTAGAGATGGTGTTA	TATCGAATTCTCTACTAACG	CCCAGTTAGAGATGGTGTTA	TATCGAATTCTCTACTAACG	T	374310
1133_D8	WT	MMS	XV	3254	3254	SNP	1	G	2	G/A	54.1/45.9	40/34	74	G	54.054	40	A	45.946	34	TAGAATTTCCATTTTGCGTT	GCTAACGGTAGTAACTATCC	TAGAATTTCCATTTTGCGTT	GCTAACGGTAGTAACTATCC	A
1133_D8	WT	MMS	XVI	195228	181701	SNP	1	T	2	T/A	54.0/46.0	27/23	50	T	54	27	A	46	23	CTCATCATCGGCAAACCAGT	ACCGTTCTGATCTATAAATT	CTCATCATCGGCAAACCAGT	ACCGTTCTGATCTATAAATT	A
1133_D8	WT	MMS	XVI	499532	482289	SNP	1	T	2	C/T	52.2/47.8	24/22	46	C	52.174	24	T	47.826	22	TCGTTTGACTGCTCTACAAT	GTAGGATGTTAATCAATGTC	TCGTTTGACTGCTCTACAAT	GTAGGATGTTAATCAATGTC	C	304304
1133-4_A1	WT	MMS	II	430215	421073	SNP	1	T	2	T/A	54.5/45.5	36/30	66	T	54.545	36	A	45.455	30	AGGTCAAGTTCAAACCCTTG	TTTCCTTGTTCAATCTCTTG	AGGTCAAGTTCAAACCCTTG	TTTCCTTGTTCAATCTCTTG	A
1133-4_A1	WT	MMS	III	292905	286473	SNP	1	A	2	A/G	51.9/48.1	41/38	79	A	51.899	41	G	48.101	38	ACTTACTAATACGTTTGAGA	TAAGCGCAGGTACTCCTGGT	ACTTACTAATACGTTTGAGA	TAAGCGCAGGTACTCCTGGT	G
1133-4_A1	WT	MMS	IV	20777	13999	SNP	1	T	2	C/T	51.4/48.6	36/34	70	C	51.429	36	T	48.571	34	AAAGAACCCAACTTATTCAA	TTTTTATGATACATTTCTCA	AAAGAACCCAACTTATTCAA	TTTTTATGATACATTTCTCA	C
1133-4_A1	WT	MMS	IV	189180	182384	SNP	1	C	2	C/T	51.6/48.4	33/31	64	C	51.562	33	T	48.438	31	TCTCTACACTCCTCGGAAAG	TCTCTATTATATTTCTCTGA	TCTCTACACTCCTCGGAAAG	TCTCTATTATATTTCTCTGA	T	168403
1133-4_A1	WT	MMS	IV	793202	772205	SNP	1	T	2	A/T	52.2/47.8	35/32	67	A	52.239	35	T	47.761	32	ATTACTGCTGTTCCTCGATT	GTTTTGGTAATGTAAATGAT	ATTACTGCTGTTCCTCGATT	GTTTTGGTAATGTAAATGAT	A	604022
1133-4_A1	WT	MMS	V	145578	145578	SNP	1	C	2	A/C	51.3/48.8	41/39	80	A	51.25	41	C	48.75	39	GATTTGAGGTTCATTTGGCT	GTGAGAACGACTTGAACCTT	GATTTGAGGTTCATTTGGCT	GTGAGAACGACTTGAACCTT	A
1133-4_A1	WT	MMS	V	441971	441918	SNP	1	T	2	C/T	52.8/46.2	56/49	106	C	52.83	56	T	46.226	49	TGGAGTATAAAATCGAAAGT	TATTCCAATTGTGCTAGGCT	TGGAGTATAAAATCGAAAGT	TATTCCAATTGTGCTAGGCT	C	296393
1133-4_A1	WT	MMS	VII	302939	296418	SNP	1	T	2	T/C	53.3/46.7	48/42	90	T	53.333	48	C	46.667	42	CCAATTGTACACGTTGCGTG	TGATCCGTGGTTTCAATGAG	CCAATTGTACACGTTGCGTG	TGATCCGTGGTTTCAATGAG	C
1133-4_A1	WT	MMS	VII	501905	495383	SNP	1	G	2	T/G	50.5/49.5	47/46	93	T	50.538	47	G	49.462	46	ATTATGAAGAATTAACGTTG	GGGAAATATATGAACTAACT	ATTATGAAGAATTAACGTTG	GGGAAATATATGAACTAACT	T	198966
1133-4_A1	WT	MMS	VII	555062	545702	SNP	1	G	2	G/T	53.9/44.7	41/34	76	G	53.947	41	T	44.737	34	TATAACCTGCTGTCACTGGC	GAAAAATACGCCCTCAGGTT	TATAACCTGCTGTCACTGGC	GAAAAATACGCCCTCAGGTT	T	53157
1133-4_A1	WT	MMS	VII	807229	790500	SNP	1	G	2	G/A	51.1/48.9	47/45	92	G	51.087	47	A	48.913	45	CTTCTTCTTCGGCGTCCTCA	ATTTACGTTTCTTATCGTTA	CTTCTTCTTCGGCGTCCTCA	ATTTACGTTTCTTATCGTTA	A	252167
1133-4_A1	WT	MMS	VIII	62724	62726	SNP	1	C	2	C/T	50.0/50.0	46/46	92	C	50	46	T	50	46	TCCTTACATGGCTTATAACT	ATTCACCATCGAATCATTGT	TCCTTACATGGCTTATAACT	ATTCACCATCGAATCATTGT	T
1133-4_A1	WT	MMS	IX	56193	39638	SNP	1	G	2	A/G	53.5/46.5	38/33	71	A	53.521	38	G	46.479	33	TTTGAAGAAAAGGAGGAAGA	AGTATAGAACAGGCTAACGC	TTTGAAGAAAAGGAGGAAGA	AGTATAGAACAGGCTAACGC	A
1133-4_A1	WT	MMS	X	436201	421683	SNP	1	T	2	C/T	51.4/48.6	38/36	74	C	51.351	38	T	48.649	36	GTCCTGGAAGGCTTACCTTA	CTATGCATTCGTACAGTTGT	GTCCTGGAAGGCTTACCTTA	CTATGCATTCGTACAGTTGT	C
1133-4_A1	WT	MMS	X	646091	625811	SNP	1	T	2	T/C	51.7/48.3	45/42	87	T	51.724	45	C	48.276	42	CTGTGTAGTGTCAGTAAGTG	CCGATTGTCTTTTATTAGTT	CTGTGTAGTGTCAGTAAGTG	CCGATTGTCTTTTATTAGTT	C	209890
1133-4_A1	WT	MMS	XI	260330	260336	SNP	1	T	2	T/C	50.6/49.4	41/40	81	T	50.617	41	C	49.383	40	CACATGCTGAATTTTCTTAA	GAGATTCATCTACGATGCTT	CACATGCTGAATTTTCTTAA	GAGATTCATCTACGATGCTT	C
1133-4_A1	WT	MMS	XI	539761	539542	SNP	1	G	2	G/T	50.0/50.0	39/39	78	G	50	39	T	50	39	CCAGCTCCTCATCACAGAAT	TTTTAAATCTTTCCTCTATA	CCAGCTCCTCATCACAGAAT	TTTTAAATCTTTCCTCTATA	T	279431
1133-4_A1	WT	MMS	XI	566843	566625	SNP	1	T	2	G/T	52.8/47.2	38/34	72	G	52.778	38	T	47.222	34	TGTCCCAGGTCCCTGAAGTG	GCCAAGCAAGACGGACTAAT	TGTCCCAGGTCCCTGAAGTG	GCCAAGCAAGACGGACTAAT	G	27082
1133-4_A1	WT	MMS	XI	625100	624846	SNP	1	G	2	G/C	54.3/45.7	51/43	94	G	54.255	51	C	45.745	43	AACCCAGCTTCAACATTCCC	CCTCAAGGGGTCTAATATCT	AACCCAGCTTCAACATTCCC	CCTCAAGGGGTCTAATATCT	C	58257
1133-4_A1	WT	MMS	XII	228418	217264	SNP	1	C	2	T/C	52.6/47.4	40/36	76	T	52.632	40	C	47.368	36	TGCAATCATCTATTTTAGTA	CCTCACCTAATTCGGCGTTG	TGCAATCATCTATTTTAGTA	CCTCACCTAATTCGGCGTTG	T
1133-4_A1	WT	MMS	XII	545183	500247	SNP	1	A	2	A/T	50.7/49.3	36/35	71	A	50.704	36	T	49.296	35	GTAATGTGTATTCTTTCGAT	TTAGAAACAATGAAAACCGT	GTAATGTGTATTCTTTCGAT	TTAGAAACAATGAAAACCGT	T	316765
1133-4_A1	WT	MMS	XIII	503779	486266	SNP	1	C	2	C/G	54.3/45.7	38/32	70	C	54.286	38	G	45.714	32	AATATAATAAACTGTTGGAA	GAGAGTAATTAATAGTGACA	AATATAATAAACTGTTGGAA	GAGAGTAATTAATAGTGACA	G
1133-4_A1	WT	MMS	XIII	758260	740726	SNP	1	T	2	T/A	53.1/46.9	43/38	81	T	53.086	43	A	46.914	38	CTGAATCCGCTAGACGTTAT	ACCACAACGGTCACCGAGAC	CTGAATCCGCTAGACGTTAT	ACCACAACGGTCACCGAGAC	A	254481
1133-4_A1	WT	MMS	XIV	569913	560012	SNP	1	G	2	A/G	50.7/49.3	37/36	73	A	50.685	37	G	49.315	36	ATCCCCGCGTTATTAGCACG	TGCCTTAACCAACTGGGCCA	ATCCCCGCGTTATTAGCACG	TGCCTTAACCAACTGGGCCA	A
1133-4_A1	WT	MMS	XIV	576835	566934	SNP	1	A	2	T/A	51.4/48.6	38/36	74	T	51.351	38	A	48.649	36	TCACTAAGCCAGCTATCAGA	GATTAGCTAGAAGAGGTGGT	TCACTAAGCCAGCTATCAGA	GATTAGCTAGAAGAGGTGGT	T	6922
1133-4_A1	WT	MMS	XV	653659	645884	SNP	1	A	2	G/A	52.9/47.1	45/40	85	G	52.941	45	A	47.059	40	TGCGTTCAAAATTCTGTTGA	CGGAATGGTAGTATTAAGAG	TGCGTTCAAAATTCTGTTGA	CGGAATGGTAGTATTAAGAG	G
1133-4_A1	WT	MMS	XV	832077	823391	SNP	1	C	2	C/T	50.8/49.2	32/31	63	C	50.794	32	T	49.206	31	TTTATTTTTTTCTTTCGATG	TGTGTGGTTTTATTATTGCT	TTTATTTTTTTCTTTCGATG	TGTGTGGTTTTATTATTGCT	T	178418
1133-4_A1	WT	MMS	XVI	145852	133091	SNP	1	T	2	T/A	53.5/46.5	38/33	71	T	53.521	38	A	46.479	33	AACTGTGCAATGGAATCCGC	TAAAGTTGGATAGTGCAAAA	AACTGTGCAATGGAATCCGC	TAAAGTTGGATAGTGCAAAA	A
1133-4_A1	WT	MMS	XVI	148560	135799	SNP	1	G	2	G/T	53.8/46.3	43/37	80	G	53.75	43	T	46.25	37	GTTTATAAAATCATTACGTT	TAAATAGTTTATTTGAATTT	GTTTATAAAATCATTACGTT	TAAATAGTTTATTTGAATTT	T	2708
1133-4_A1	WT	MMS	XVI	160839	148078	SNP	1	G	2	G/A	53.4/46.6	39/34	73	G	53.425	39	A	46.575	34	TTTTGGGGCTTGGTGATTCA	AATCATGGCCTGAAAAGTTT	TTTTGGGGCTTGGTGATTCA	AATCATGGCCTGAAAAGTTT	A	12279
1133-4_A1	WT	MMS	XVI	252128	239367	SNP	1	G	2	C/G	52.1/47.9	49/45	94	C	52.128	49	G	47.872	45	AGTAGGCAGGATTTAGCATA	CAAATGGAGATCTTAACGTA	AGTAGGCAGGATTTAGCATA	CAAATGGAGATCTTAACGTA	C	91289
1133-4_A1	WT	MMS	XVI	463168	446677	SNP	1	T	2	G/T	50.9/49.1	29/28	57	G	50.877	29	T	49.123	28	TATGGATACGACACGTAGGG	GTCATTATGGGCTTGTTCAG	TATGGATACGACACGTAGGG	GTCATTATGGGCTTGTTCAG	G	211040
1133-4_A1	WT	MMS	XVI	646209	629718	SNP	1	C	2	C/T	51.5/48.5	34/32	66	C	51.515	34	T	48.485	32	AAAGACACTTGGCATCTTTA	TTACTTGGGCAAGTAAGTCA	AAAGACACTTGGCATCTTTA	TTACTTGGGCAAGTAAGTCA	T	183041
1133-4_A1	WT	MMS	IV	456247	448667	DIP	1	-	2	T/-	52.3/47.7	46/42	88	T	52.273	46	-	47.727	42	GTAAATGACCGGAATTATGA	TTTTTTTTCAAAAAAGAAAC	GTAAATGACCGGAATTATGA	TTTTTTTTCAAAAAAGAAAC	T
1133-4_A1	WT	MMS	XIII	3876	1948	DIP	1	G	2	G/-	50.0/50.0	2018-11-11	22	G	50	11	-	50	11	TTAGTATCTCTTCTCAACTT	GGCAGCACACATGCAAAACA	TTAGTATCTCTTCTCAACTT	GGCAGCACACATGCAAAACA	-
1133-4_A1	WT	MMS	XIII	156554	151981	DIP	1	G	2	-/G	51.1/48.9	46/44	90	-	51.111	46	G	48.889	44	TAAATCACCAGGATTAAATT	GTCTCTTGAACCCAGTACGA	TAAATCACCAGGATTAAATT	GTCTCTTGAACCCAGTACGA	-	152678
1133-4_A1	WT	MMS	XV	236203	232811	DIP	6	------	2	------/CAAGCT	54.4/45.6	31/26	57	------	54.386	31	CAAGCT	45.614	26	ATCAGATGCAACAACAGCAA	CAAGCTCAAGCTCAAGCTCA	ATCAGATGCAACAACAGCAA	CAAGCTCAAGCTCAAGCTCA	CAAGCT
1133-4_A10	WT	MMS	I	22321	22323	SNP	1	G	2	G/A	52.9/47.1	36/32	68	G	52.941	36	A	47.059	32	AAGACGACATGAAGATTGAG	AAATGGTCCCAAGATCTAAT	AAGACGACATGAAGATTGAG	AAATGGTCCCAAGATCTAAT	A
1133-4_A10	WT	MMS	II	96056	93795	SNP	1	G	2	G/A	51.4/48.6	19/18	37	G	51.351	19	A	48.649	18	AAAAAAAAAAATGAACAGGT	AAAAAAAATCAATTTGAAAA	AAAAAAAAAAATGAACAGGT	AAAAAAAATCAATTTGAAAA	A		Complex
1133-4_A10	WT	MMS	II	96064	93803	SNP	1	A	2	A/G	52.4/47.6	22/20	42	A	52.381	22	G	47.619	20	AAATGAACAGGTGAAAAAAA	TCAATTTGAAAACCAAAGAA	AAATGAACAGGTGAAAAAAA	TCAATTTGAAAACCAAAGAA	G	8	Complex
1133-4_A10	WT	MMS	II	513741	503320	SNP	1	T	2	A/T	51.2/48.8	21/20	41	A	51.22	21	T	48.78	20	TGCAGTCCTGTTTGTTTTAG	GATCTCTTAGCAATGTATTT	TGCAGTCCTGTTTGTTTTAG	GATCTCTTAGCAATGTATTT	A	417677
1133-4_A10	WT	MMS	IV	151502	144796	SNP	1	T	2	A/T	53.8/46.2	21/18	39	A	53.846	21	T	46.154	18	CGGATAAACCTTTACCAACA	AATCATTAGCATCACCATTC	CGGATAAACCTTTACCAACA	AATCATTAGCATCACCATTC	A
1133-4_A10	WT	MMS	IV	677070	655192	SNP	1	G	2	A/G	50.0/50.0	14/14	28	A	50	14	G	50	14	TCTGCGAGATTTCATACTGG	GGTATACTGTGCATTCAGTA	TCTGCGAGATTTCATACTGG	GGTATACTGTGCATTCAGTA	A	525568
1133-4_A10	WT	MMS	IV	835854	813977	SNP	1	C	2	A/C	51.4/48.6	19/18	37	A	51.351	19	C	48.649	18	TACTTTCTTGTTCAACAACG	GATTAACCCAAATAATAAAA	TACTTTCTTGTTCAACAACG	GATTAACCCAAATAATAAAA	A	158784
1133-4_A10	WT	MMS	IV	1150701	1117645	SNP	1	G	2	A/G	51.2/48.8	22/21	43	A	51.163	22	G	48.837	21	TATATCTTCCAGTAGGAACC	ATAGTTTGAGTAATGTTTAT	TATATCTTCCAGTAGGAACC	ATAGTTTGAGTAATGTTTAT	A	314847
1133-4_A10	WT	MMS	VI	153028	147732	SNP	1	G	2	A/G	51.0/49.0	25/24	49	A	51.02	25	G	48.98	24	TGGAGGATCTTGAGTTGCTC	AAGCTGCAAAACTGCGGGAA	TGGAGGATCTTGAGTTGCTC	AAGCTGCAAAACTGCGGGAA	A
1133-4_A10	WT	MMS	VI	194201	188906	SNP	1	A	2	G/A	51.9/48.1	27/25	52	G	51.923	27	A	48.077	25	ATAAATTAGACTAGTATGTG	CAACGCTAAACATGCGTTCC	ACAAATTAGACTAGTATGTG	CAACGCTAAACATGCGTTCC	G	41173
1133-4_A10	WT	MMS	VII	633200	616965	SNP	1	C	2	C/A	55.0/45.0	22/18	40	C	55	22	A	45	18	TGGGATAAGTCCAAGTTAGA	AATTGTGCCCGAATTTCCCT	TGGGATAAGTCCAAGTTAGA	AATTGTGCCCGAATTTCCCT	A
1133-4_A10	WT	MMS	VII	770516	753402	SNP	1	G	2	C/G	49.1/49.1	28/28	57	C	49.123	28	G	49.123	28	TTGGTAGACCTGGTAAGATA	AAGAGGAAGAAGGCTTCTTT	TTGGTAGACCTGGTAAGATA	AAGAGGAAGAAGGCTTCTTT	C	137316
1133-4_A10	WT	MMS	VIII	40855	40855	SNP	1	A	2	A/G	51.4/48.6	19/18	37	A	51.351	19	G	48.649	18	CTATTGAGCAGTCACCTAGG	TGATTGAACTGATGGAATTT	CTATTGAGCAGTCACCTAGG	TGATTGAACTGATGGAATTT	G
1133-4_A10	WT	MMS	VIII	325635	317321	SNP	1	T	2	T/C	51.2/48.8	22/21	43	T	51.163	22	C	48.837	21	TTCGCCATTCAGGACGAATT	TGTTGGCATCAGCAAGTCCG	TTCGCCATTCAGGACGAATT	TGTTGGCATCAGCAAGTCCG	C	284780
1133-4_A10	WT	MMS	X	272565	258154	SNP	1	T	2	T/A	52.5/47.5	21/19	40	T	52.5	21	A	47.5	19	AGAAAGACTATGCAAATGCG	TAAAATTTGCTCGAAGCAAT	AGAAAGACTATGCAAATGCG	AAAATTTGCTCGAAGCAATT	A
1133-4_A10	WT	MMS	X	289485	275074	SNP	1	T	2	A/T	53.6/46.4	15/13	28	A	53.571	15	T	46.429	13	AAACTATAAATTAGTAAATA	ACTATCCGTTGCAAGTCTTT	AAACTATAAATTAGTAAATA	ACTATCCGTTGCAAGTCTTT	A	16920
1133-4_A10	WT	MMS	X	484850	463838	SNP	1	G	2	A/G	51.2/48.8	21/20	41	A	51.22	21	G	48.78	20	GGAGAGACACTCTCCAGGCT	AAAGTTTGAGAAGCTGTTCT	GGAGAGACACTCTCCAGGCT	AAAGTTTGAGAAGCTGTTCT	A	195365
1133-4_A10	WT	MMS	X	523951	502939	SNP	1	G	2	A/G	50.0/50.0	2018-08-08	16	A	50	8	G	50	8	TGATCTTGATACATACGTTG	TATTTTACTTTGAAGACTGT	TGATCTTGATACATACGTTG	TATTTTACTTTGAAGACTGT	A	39101
1133-4_A10	WT	MMS	X	529663	508651	SNP	1	T	2	C/T	51.6/48.4	16/15	31	C	51.613	16	T	48.387	15	AATGTACACCAATACAAATG	ATCTTATACACTCGTCAAAT	AATGTACACCAATACAAATG	ATCTTATACACTCGTCAAAT	C	5712
1133-4_A10	WT	MMS	X	532308	511296	SNP	1	A	2	A/G	52.3/47.7	23/21	44	A	52.273	23	G	47.727	21	AAGAAATTGATGAAATTGGA	CAGGTAGTGGTACCGAGACA	AAGAAATTGATGAAATTGGA	CAGGTAGTGGTACCGAGACA	G	2645
1133-4_A10	WT	MMS	X	542588	521576	SNP	1	G	2	G/A	51.4/48.6	18/17	35	G	51.429	18	A	48.571	17	ATTGTATGAGCTGCCACGAT	CTAAACTGCAAAACGACGTA	ATTGTATGAGCTGCCACGAT	CTAAACTGCAAAACGACGTA	A	10280
1133-4_A10	WT	MMS	XII	401833	390328	SNP	1	C	2	A/C	54.8/45.2	23/19	42	A	54.762	23	C	45.238	19	TGATGCATTTAAAGCTGATG	ATCGGGTGAAGGCGTTGAAG	TGATGCATTTAAAGCTGATG	ATCGGGTGAAGGCGTTGAAG	A
1133-4_A10	WT	MMS	XIV	142483	132484	SNP	1	A	2	A/G	52.4/47.6	22/20	42	A	52.381	22	G	47.619	20	ATTTTGACCCAACAAGTGAA	CCAATGAAAGATTATTAAAG	ATTTTGACCCAACAAGTGAA	CCAATGAAAGATTATTAAAG	G
1133-4_A10	WT	MMS	XIV	201984	191986	SNP	1	T	2	C/T	51.4/48.6	19/18	37	C	51.351	19	T	48.649	18	GTATCTCGACATGTTTTATT	TTACTATACATACATAAAAG	GTATCTCGACATGTTTTATT	TTACTATACATACATAAAAG	C	59501
1133-4_A10	WT	MMS	XV	89551	89482	SNP	1	A	2	T/A	52.3/47.7	23/21	44	T	52.273	23	A	47.727	21	TATAATATATATATACATGT	CGTGTATTAGTTTCGAATAG	TATAATATATATATACATGT	CGTGTATTAGTTTCGAATAG	T
1133-4_A10	WT	MMS	XV	717439	708570	SNP	1	A	2	A/T	54.1/45.9	20/17	37	A	54.054	20	T	45.946	17	TTACCTCCACCTCAAACACA	ACTATTCAAGGTACAGACCA	TTACCTCCACCTCAAACACA	ACTATTCAAGGTACAGACCA	T	627888
1133-4_A10	WT	MMS	XV	741895	733024	SNP	1	G	2	C/G	50.0/50.0	14/14	28	C	50	14	G	50	14	GAATGAGGGTTAATTTCATA	TAAATCTTTCATGGACAGAA	GAATGAGGGTTAATTTCATA	TAAATCTTTCATGGACAGAA	C	24456
1133-4_A10	WT	MMS	XV	1057413	1047658	SNP	1	C	2	G/C	53.2/46.8	25/22	47	G	53.191	25	C	46.809	22	TTGGAAATTTCTCAACAAGA	GAGAAGGCCGATGGAAAAGG	TTGGAAATTTCTCAACAAGA	GAGAAGGCCGATGGAAAAGG	G	315518
1133-4_A10	WT	MMS	V	123737	123670	DIP	1	C	2	C/-	54.5/45.5	24/20	44	C	54.545	24	-	45.455	20	AAGCTGGAAATTGACGGCTT	CCCAATTATGCCAAGAAGAG	AAGCTGGAAATTGACGGCTT	CCCAATTATGCCAAGAAGAG	-
1133-4_A10	WT	MMS	X	272565	258154	DIP	1	-	2	-/A	52.4/47.6	22/20	42	-	52.381	22	A	47.619	20	AGAAAGACTATGCAAATGCG	TAAAATTTGCTCGAAGCAAT	AGAAAGACTATGCAAATGCG	AAAATTTGCTCGAAGCAATT	A
1133-4_A10	WT	MMS	XI	385104	385108	DIP	2	--	2	--/TT	50.0/38.5	13/10	26	--	50	13	TT	38.462	10	AACTTCAAATGCGCCAATTC	TTTTTTTTTTTTTTTTTTTT	AACTTCAAATGCGCCAATTC	TTTTTTTTTTTTTTTTTTTT	TT
1133-4_A11	WT	MMS	I	53041	52060	SNP	1	A	2	A/G	50.0/50.0	33/33	66	A	50	33	G	50	33	ATGTGCAGTGGGTGGTTCAC	AATAGCTCGTCTGCCAGTTC	ATGTGCAGTGGGTGGTTCAC	AATAGCTCGTCTGCCAGTTC	G
1133-4_A11	WT	MMS	II	38114	35923	SNP	1	T	2	C/T	52.2/47.8	36/33	69	C	52.174	36	T	47.826	33	AAGCTTTCTGAAAAGGAAGG	TCTGGTTCTTTAACTGCTTT	AAGCTTTCTGAAAAGGAAGG	TCTGGTTCTTTAACTGCTTT	C
1133-4_A11	WT	MMS	II	330527	321722	SNP	1	C	2	C/A	53.2/46.8	50/44	94	C	53.191	50	A	46.809	44	CTATTGTGGTATTTCAAGAA	TAGCTTACCAACAGTTTTTC	CTATTGTGGTATTTCAAGAA	TAGCTTACCAACAGTTTTTC	A	292413
1133-4_A11	WT	MMS	II	687483	677576	SNP	1	C	2	C/A	53.1/46.9	34/30	64	C	53.125	34	A	46.875	30	TACTACCAAGAGGGCATTGG	ACGAATTTACATATGCCACG	TACTACCAAGAGGGCATTGG	ACGAATTTACATATGCCACG	A	356956
1133-4_A11	WT	MMS	IV	1409631	1372089	SNP	1	T	2	T/C	53.0/47.0	35/31	66	T	53.03	35	C	46.97	31	TCTTAAACATCTTACCTATT	TGATGTTTCTTTTAGAGGCA	TCTTAAACATCTTACCTATT	TGATGTTTCTTTTAGAGGCA	C
1133-4_A11	WT	MMS	IV	1469966	1432424	SNP	1	A	2	A/T	50.0/50.0	43/43	86	A	50	43	T	50	43	GTTAAATGAGCAAGTATTAA	GAAGCATTCTTTCACGACGT	GTTAAATGAGCAAGTATTAA	GAAGCATTCTTTCACGACGT	T	60335
1133-4_A11	WT	MMS	VII	467874	461403	SNP	1	T	2	C/T	50.9/49.1	28/27	55	C	50.909	28	T	49.091	27	TGTAAAGACCAACATGGTTG	CGTTTTCTGCAAAAGCAGTT	TGTAAAGACCAACATGGTTG	CGTTTTCTGCAAAAGCAGTT	C
1133-4_A11	WT	MMS	VII	740909	724342	SNP	1	A	2	A/T	50.7/49.3	38/37	75	A	50.667	38	T	49.333	37	CACACTTTTACATTACAAGA	GGTTTGGATGCTTTGGACGA	CACACTTTTACATTACAAGA	GGTTTGGATGCTTTGGACGA	T	273035
1133-4_A11	WT	MMS	VII	774411	757838	SNP	1	G	2	A/G	53.8/44.9	42/35	78	A	53.846	42	G	44.872	35	GAGGTCTCCGGTTCGATTCC	GACTCGTCCAAATTTTTTTA	GAGGTCTCCGGTTCGATTCC	GACTCGTCCAAATTTTTTTA	A	33502
1133-4_A11	WT	MMS	VII	961026	934718	SNP	1	C	2	A/C	52.9/47.1	45/40	85	A	52.941	45	C	47.059	40	TGCAAGCTATGATTGGTCAT	TAAAAGAACTAGAGCATCGT	TGCAAGCTATGATTGGTCAT	TAAAAGAACTAGAGCATCGT	A	186615
1133-4_A11	WT	MMS	VIII	241402	233394	SNP	1	T	2	C/T	52.6/47.4	40/36	76	C	52.632	40	T	47.368	36	ATAGGTGAAAAATTAACATG	GTTTGAAATTCCAGCTAACT	ATAGGTGAAAAATTAACATG	GTTTGAAATTCCAGCTAACT	C
1133-4_A11	WT	MMS	IX	338962	322491	SNP	1	A	2	A/G	50.9/49.1	29/28	57	A	50.877	29	G	49.123	28	GGCTACAGATGAAATGGCCG	CCCAAACTAACCAAGCACAA	GGCTACAGATGAAATGGCCG	CCCAAACTAACCAAGCACAA	G
1133-4_A11	WT	MMS	X	299818	285683	SNP	1	T	2	C/T	53.1/46.9	26/23	49	C	53.061	26	T	46.939	23	CTGAAGCTCTCTCCGCAAGG	CTTTGCGTCTTTCGTTAAAC	CTGAAGCTCTCTCCGCAAGG	CTTTGCGTCTTTCGTTAAAC	C
1133-4_A11	WT	MMS	XII	11815	4222	SNP	1	C	2	T/C	52.2/47.8	48/44	92	T	52.174	48	C	47.826	44	ATCAGTACCAAATGCACTCG	ATCATTATGCACGGCACTTG	ATCAGTACCAAATGCACTCG	ATCATTATGCACGGCACTTG	T
1133-4_A11	WT	MMS	XII	49937	42344	SNP	1	C	2	C/T	52.5/47.5	31/28	59	C	52.542	31	T	47.458	28	CATTCTAATGCATTAAAAGA	ATGAGTAATCCTCAAAAAGC	CATTCTAATGCATTAAAAGA	ATGAGTAATCCTCAAAAAGC	T	38122
1133-4_A11	WT	MMS	XII	433077	421853	SNP	1	T	2	T/C	53.7/46.3	29/25	54	T	53.704	29	C	46.296	25	TTTCAAATCATGTAAGTATT	TAAATTTAACCAAAAATTTT	TTTCAAATCATGTAAGTATT	TAAATTTAACCAAAAATTTT	C	383140
1133-4_A11	WT	MMS	XIII	501560	482765	SNP	1	C	2	A/C	54.2/45.8	39/33	72	A	54.167	39	C	45.833	33	TCTTTTCGTCCAATTCACTT	GAAGTGACACAATATTACGT	TCTTTTCGTCCAATTCACTT	GAAGTGACACAATATTACGT	A
1133-4_A11	WT	MMS	XIV	63636	57941	SNP	1	G	2	G/T	53.3/46.7	32/28	60	G	53.333	32	T	46.667	28	AACTTTCTACCGGTGGACAA	ATTCTTGGAGCCTTACCCTT	AACTTTCTACCGGTGGACAA	ATTCTTGGAGCCTTACCCTT	T
1133-4_A11	WT	MMS	XIV	77562	71865	SNP	1	G	2	G/C	53.6/46.4	37/32	69	G	53.623	37	C	46.377	32	GTTACCATCTTCGCACAAAC	TAAACCCGTAATACCGTGGG	GTTACCATCTTCGCACAAAC	TAAACCCGTAATACCGTGGG	C	13926
1133-4_A11	WT	MMS	XIV	482085	472393	SNP	1	C	2	G/C	54.2/45.8	32/27	59	G	54.237	32	C	45.763	27	GCAAGGTATTCAAACCCAAA	TAGGCGTATGGGACCTCTAG	GCAAGGTATTCAAACCCAAA	TAGGCGTATGGGACCTCTAG	G	404523
1133-4_A11	WT	MMS	XIV	706566	696017	SNP	1	A	2	A/T	52.5/47.5	32/29	61	A	52.459	32	T	47.541	29	AGAAGATGATATTAAATGGG	GCAACCTGATGTAGCACATG	AGAAGATGATATTAAATGGG	GCAACCTGATGTAGCACATG	T	224481
1133-4_A11	WT	MMS	XV	522398	519023	SNP	1	T	2	T/A	51.4/48.6	36/34	70	T	51.429	36	A	48.571	34	TTTAAAAAGCTAAATTTGCA	GATATCAGTTAATCAAGATT	TTTAAAAAGCTAAATTTGCA	GATATCAGTTAATCAAGATT	A
1133-4_A11	WT	MMS	XV	625855	618064	SNP	1	C	2	T/C	51.8/48.2	43/40	83	T	51.807	43	C	48.193	40	TATAGAAACGCGTTTAGAGA	TCCAAACACAAGCAATCTCT	TATAGAAACGCGTTTAGAGA	TCCAAACACAAGCAATCTCT	T	103457
1133-4_A11	WT	MMS	II	800367	790456	DIP	1	C	2	C/-	52.2/47.8	36/33	69	C	52.174	36	-	47.826	33	GCCATGCGCAATTTACCCCG	CCCCGGATTTTATTGTCCGT	GCCATGCGCAATTTACCCCG	CCCCGGATTTTATTGTCCGT	-
1133-4_A11	WT	MMS	III	316519	310048	DIP	1	T	2	T/-	50.0/40.0	2018-05-04	10	T	50	5	-	40	4	AGAATAGGGTAGTGTTAGGG	AGTGTGTGGGTGTGGGTGTG	AGTAGAGGTAGATGTGAGGG	AGTGTGTGGGTGTGGGTGTG	-
1133-4_A12	WT	MMS	II	167440	165255	SNP	1	A	2	A/T	50.0/50.0	45/45	90	A	50	45	T	50	45	CACGGTGAAGAATAAAAATA	CGTCGGAATTTTAGTATGGT	CACGGTAAAGAATAAAAATA	CGTCGGAATTTTAGTATGGT	T
1133-4_A12	WT	MMS	II	460520	451426	SNP	1	G	2	T/G	54.8/45.2	34/28	62	T	54.839	34	G	45.161	28	AGCCGGCGTTAGAAGATGGC	CATATTATTATTTTATTAGA	AGCCGGCGTTAGAAGATGGC	CATATTATTATTTTATTAGA	T	293080
1133-4_A12	WT	MMS	II	528403	518577	SNP	1	A	2	A/G	50.0/50.0	39/39	78	A	50	39	G	50	39	GAATCCAAATTGAACTGGAA	CCAGTAGATATTCCGGACAC	GAATCCAAATTGAACTGGAA	CCAGTAGATATTCCGGACAC	G	67883
1133-4_A12	WT	MMS	III	132936	130319	SNP	1	C	2	A/C	50.0/50.0	42/42	84	A	50	42	C	50	42	GCTTGGTATAAGTCGCTCTT	AAAAACTTTTGACGCCCAAT	GCTTGGTATAAGTCGCTCTT	AAAAACTTTTGACGCCCAAT	A
1133-4_A12	WT	MMS	III	135896	133279	SNP	1	C	2	C/T	54.1/45.9	40/34	74	C	54.054	40	T	45.946	34	ATCACAGCAGTCAATGCCAA	ACCAATTTCCCTTGCCATGA	ATCACAGCAGTCAATGCCAA	ACCAATTTCCCTTGCCATGA	T	2960
1133-4_A12	WT	MMS	IV	83893	77431	SNP	1	G	2	G/T	54.7/45.3	41/34	75	G	54.667	41	T	45.333	34	GCCGGCGGCAATTTCGAGAT	TTTTATGTCATGTTGGATTT	GCCGGCGGCAATTTCGAGAT	TTTTATGTCATGTTGGATTT	T
1133-4_A12	WT	MMS	IV	174150	167678	SNP	1	T	2	T/C	54.2/45.8	45/38	83	T	54.217	45	C	45.783	38	CACAAACCAATTTTCTAATG	AACAATATTTTTAAAAATAA	CACAAACCAATTTTCTAATG	AACAATATTTTTAAAAATAA	C	90257
1133-4_A12	WT	MMS	IV	262944	256466	SNP	1	G	2	A/G	54.8/45.2	34/28	62	A	54.839	34	G	45.161	28	GGATGCCCATGGAGGAAGTT	CCCTAGATGAGATTGCAAGT	GGATGCCCATGGAGGAAGTT	CCCTAGATGAGATTGCAAGT	A	88794
1133-4_A12	WT	MMS	IV	668717	647882	SNP	1	T	2	C/T	53.0/47.0	35/31	66	C	53.03	35	T	46.97	31	TAAACGGAGAGAGAATAATG	TGTTATATAGAATTGTTGAT	TAAACGGAGAGAGAATAATG	TGTTATATAGAATTGTTGAT	C	405773
1133-4_A12	WT	MMS	IV	691001	670167	SNP	1	C	2	A/C	51.6/48.4	32/30	62	A	51.613	32	C	48.387	30	ATTTACAGACTCTTTTAATT	TAAATAGGTAAAATGTTCTT	ATTTACAGACTCTTTTAATT	TAAATAGGTAAAATGTTCTT	A	22284
1133-4_A12	WT	MMS	IV	895027	872454	SNP	1	C	2	C/T	51.0/49.0	25/24	49	C	51.02	25	T	48.98	24	ATAAAAAAAATAATCATACT	TATTACTATGGCTAACGTAG	ATAAAAAAAATAATCATACT	TATTACTATGGCTAACGTAG	T	204026
1133-4_A12	WT	MMS	IV	1093360	1066850	SNP	1	C	2	C/G	52.9/47.1	37/33	70	C	52.857	37	G	47.143	33	CTAAATTTAGAATAAAGTCA	TGAGAATTGGCCTTATAGCT	CTAAATTTAGAATAAAGTCA	TGAGAATTGGCCTTATAGCT	G	198333
1133-4_A12	WT	MMS	IV	1396697	1358511	SNP	1	T	2	T/C	52.4/47.6	43/39	82	T	52.439	43	C	47.561	39	CGAAGGGCCTGCTATGTCTT	GAACAGCTACAATAAGATCG	CGAAGGGCCTGCTATGTCTT	GAACAGCTACAATAAGATCG	C	303337
1133-4_A12	WT	MMS	IV	1468301	1430115	SNP	1	C	2	A/C	51.4/48.6	38/36	74	A	51.351	38	C	48.649	36	AAATATTCTACTTCATTTTC	GGTTCTATAGAGCCAATTTG	AAATATTCTACTTCATTTTC	GGTTCTATAGAGCCAATTTG	A	71604
1133-4_A12	WT	MMS	V	9759	9754	SNP	1	C	2	A/C	51.6/48.4	49/46	95	A	51.579	49	C	48.421	46	GTATATTGTCAGACCTGTTC	TTTAAGAGGTGATGGTGATA	GTATATTGTCAGACCTGTTC	TTTAAGAGGTGATGGTGATA	A
1133-4_A12	WT	MMS	V	239678	239665	SNP	1	G	2	G/A	53.4/46.6	47/41	88	G	53.409	47	A	46.591	41	TTACTAAAAGTTAGTAAAGA	AAAATAGGTTAAGGATGTGA	TTACTAAAAGTTAGTAAAGA	AAAATAGGTTAAGGATGTGA	A	229919
1133-4_A12	WT	MMS	V	442330	442273	SNP	1	G	2	C/G	50.6/49.4	45/44	89	C	50.562	45	G	49.438	44	CACCTTCACCGCTGTTAGGG	AGTTTTATCCAGCGTCAGCA	CACCTTCACCGCTGTTAGGG	AGTTTTATCCAGCGTCAGCA	C	202652
1133-4_A12	WT	MMS	VI	105785	105344	SNP	1	T	2	A/T	52.2/47.8	36/33	69	A	52.174	36	T	47.826	33	TGGTGAATCCTGAGAAATCA	GAAATTGGGAACCAAAGGGA	TGGTGAATCCTGAGAAATCA	GAAATTGGGAACCAAAGGGA	A
1133-4_A12	WT	MMS	VI	245017	239666	SNP	1	A	2	A/C	51.4/48.6	38/36	74	A	51.351	38	C	48.649	36	GGGACACCACACAGCATACC	TCCTGCTTACAGTACAAATT	GGGACACCACACAGCATACC	TCCTGCTTACAGTACAAATT	C	139232
1133-4_A12	WT	MMS	VII	437223	430891	SNP	1	G	2	C/G	54.9/45.1	45/37	82	C	54.878	45	G	45.122	37	TAACTGAATGCCGGCAGGTT	AAACAAATTCTTGAAAATTA	TAACTGAATGCCGGCAGGTT	AAACAAATTCTTGAAAATTA	C
1133-4_A12	WT	MMS	VII	616017	600426	SNP	1	A	2	A/T	54.2/45.8	45/38	83	A	54.217	45	T	45.783	38	AGGATTAAACTCTTAGGGAT	TCGCTAAGATAAAAGTAGAA	AGGATTAAACTCTTAGGGAT	TCGCTAAGATAAAAGTAGAA	T	178794
1133-4_A12	WT	MMS	VII	1031885	1006052	SNP	1	C	2	C/G	51.9/48.1	42/39	81	C	51.852	42	G	48.148	39	AACCTTTAATCTAGATAGAT	GAAAATCTCTTTACCAGATT	AACCTTTAATCTAGATAGAT	GAAAATCTCTTTACCAGATT	G	415868
1133-4_A12	WT	MMS	VIII	358520	350638	SNP	1	A	2	A/T	53.0/47.0	35/31	66	A	53.03	35	T	46.97	31	CAGGACCTCCAGATAACTTG	CCGAAGTTTTTTCTTCAGTC	CAGGACCTCCAGATAACTTG	CCGAAGTTTTTTCTTCAGTC	T
1133-4_A12	WT	MMS	IX	102155	85939	SNP	1	A	2	A/T	53.4/46.6	39/34	73	A	53.425	39	T	46.575	34	CTAAGAACACATGTCACCGC	TTAACAAGCCCTTGGCGATC	CTAAGAACACATGTCACCGC	TTAACAAGCCCTTGGCGATC	T
1133-4_A12	WT	MMS	X	136795	122779	SNP	1	T	2	C/T	50.7/49.3	35/34	69	C	50.725	35	T	49.275	34	TCTAAATTATATTTGGTTGT	TGCTTTCTGCTGGGTTTTTA	TCTAAATTATATTTGGTTGT	TGCTTTCTGCTGGGTTTTTA	C
1133-4_A12	WT	MMS	XII	135852	128483	SNP	1	A	2	A/G	54.2/45.8	52/44	96	A	54.167	52	G	45.833	44	TAGTATAGTGTCCGTAAACA	CGGTATATGAATAGGTCTTT	TAGTATAGTGTCCGTAAACA	CGGTATATGAATAGGTCTTT	G
1133-4_A12	WT	MMS	XIII	638374	620489	SNP	1	A	2	A/G	51.4/48.6	37/35	72	A	51.389	37	G	48.611	35	TGGTTCAATCTTACCGCCTG	CTCGATGAAACAGTTATCTG	TGGTTCAATCTTACCGCCTG	CTCGATGAAACAGTTATCTG	G
1133-4_A12	WT	MMS	XIII	817945	800057	SNP	1	C	2	C/T	52.2/47.8	35/32	67	C	52.239	35	T	47.761	32	AGCGGTTGATTGATGTGCTG	AATACTGTGATGTTCGGTTC	AGCGGTTGATTGATGTGCTG	AATACTGTGATGTTCGGTTC	T	179571
1133-4_A12	WT	MMS	XIII	892810	874920	SNP	1	C	2	A/C	50.9/49.1	28/27	55	A	50.909	28	C	49.091	27	AAAACTAAAAATAAAGAGAT	GCTAAAAGAATCGAAAAAAA	AAAACTAAAAATAAAGAGAT	GCTAAAAGAATC-AAAAAAA	A	74865
1133-4_A12	WT	MMS	XIV	216704	207613	SNP	1	C	2	C/T	53.9/46.1	41/35	76	C	53.947	41	T	46.053	35	ATACCGAATTCTCTTCTCCA	GCTAGAGTCATGGTGATTCT	ATACCGAATTCTCTTCTCCA	GCTAGAGTCATGGTGATTCT	T
1133-4_A12	WT	MMS	XIV	374853	365760	SNP	1	G	2	G/A	51.3/48.7	39/37	76	G	51.316	39	A	48.684	37	GACGACAAAAAGGCGGAAAA	GTTTCAGAAAAATAAGCGGA	GACGACAAAAAGGCGGAAAA	GTTTCAGAAAAATAAGCGGA	A	158149
1133-4_A12	WT	MMS	XIV	375595	366502	SNP	1	A	2	A/G	51.9/48.1	42/39	81	A	51.852	42	G	48.148	39	AAGGGAAGTGAATGAAATGG	CCCTTTTGAATCTTTTATCT	AAGGGAAGTGAATGAAATGG	CCCTTTTGAATCTTTTATCT	G	742
1133-4_A12	WT	MMS	XIV	562956	553760	SNP	1	A	2	A/G	54.1/45.9	20/17	37	A	54.054	20	G	45.946	17	TAAAACTTGCCTAGAGGGGA	TAGTATATGTTGAGCAAGTG	TAAAACTTGCCTAGAGGGGA	TAGTATATGTTGAGCAAGTG	G	187361
1133-4_A12	WT	MMS	XV	502142	498693	SNP	1	T	2	C/T	50.0/50.0	31/31	62	C	50	31	T	50	31	TGCTCCGCCTTCTGGGAGTA	TGTTCGCAGAAGTCGAGTTT	TGCTCCGCCTTCTGGGAGTA	TGTTCGCAGAAGTCGAGTTT	C
1133-4_A12	WT	MMS	XV	520582	517133	SNP	1	C	2	A/C	52.5/47.5	42/38	80	A	52.5	42	C	47.5	38	TAATAAAAATGGCAGAATTT	TCGGCAAAAAAAGAAATCAT	TAATAAAAATGGCAGAATTT	TCGGCAAAAAAAGAAATCAT	A	18440
1133-4_A2	WT	MMS	I	109310	108313	SNP	1	T	2	T/C	50.9/49.1	27/26	53	T	50.943	27	C	49.057	26	TGAGAGGTATGTACTGTGCG	TGCTTAAAGGAAGCCCTGTC	TGAGAGGTATGTACTGTGCG	TGCTTAAAGGAAGCCCTGTC	C
1133-4_A2	WT	MMS	I	143825	142797	SNP	1	C	2	C/G	53.6/46.4	45/39	84	C	53.571	45	G	46.429	39	ATTAAGTGAAAAACTGGCAT	TAGTTCTTCATATACGGCAC	ATTAAGTGAAAAACTGGCAT	TAGTTCTTCATATACGGCAC	G	34515
1133-4_A2	WT	MMS	II	222659	220328	SNP	1	G	2	G/A	52.6/47.4	41/37	78	G	52.564	41	A	47.436	37	CAGGAACTTACTGAATCTAC	GTAAATCACACTAATCATTC	CAGGAACTTACTGAATCTAC	GTAAATCACACTAATCATTC	A		Complex
1133-4_A2	WT	MMS	II	222668	220337	SNP	1	C	2	C/T	53.1/46.9	43/38	81	C	53.086	43	T	46.914	38	ACTGAATCTACGGTAAATCA	ACTAATCATTCTGATGATGA	ACTGAATCTACGGTAAATCA	ACTAATCATTCTGATGATGA	T	9	Complex
1133-4_A2	WT	MMS	II	321797	312699	SNP	1	A	2	A/G	54.0/46.0	27/23	50	A	54	27	G	46	23	ATAACGATTTACCATAAACT	AAGTAAACTATGTATGTGCC	ATAACGATTTACCATAAACT	AAGTAAACTATGTATGTGCC	G	99129
1133-4_A2	WT	MMS	III	65955	65227	SNP	1	C	2	C/T	52.1/47.9	25/23	48	C	52.083	25	T	47.917	23	TACTGGAAATCCTTTGGGAT	AACCCAAGCTTACTCATTCT	TACTGGAAATCCTTTGGGAT	AACCCAAGCTTACTCATTCT	T
1133-4_A2	WT	MMS	III	80491	79763	SNP	1	A	2	T/A	54.0/46.0	27/23	50	T	54	27	A	46	23	ATAGTTCTCCAATACCTTTG	GAAGTAGTAAAAGAATTACA	ATAGTTCTCCAATACCTTTG	GAAGTAGTAAAAGAATTACA	T	14536
1133-4_A2	WT	MMS	III	310669	304209	SNP	1	A	2	A/T	53.5/46.5	46/40	86	A	53.488	46	T	46.512	40	TTTAAAAGAGAAGAGCGCAA	TTTTTACAAAGAATGCCTAT	TTTAAAAGAGAAGAGCGCAA	TTTTTACAAAGAATGCCTAT	T	230178
1133-4_A2	WT	MMS	IV	279342	272497	SNP	1	C	2	C/T	53.5/46.5	38/33	71	C	53.521	38	T	46.479	33	AGGTTTATTCTGGACTAATC	TGACAAGTTTGACAAGTTGG	AGGTTTATTCTGGACTAATC	TGACAAGTTTGACAAGTTGG	T
1133-4_A2	WT	MMS	IV	356529	349686	SNP	1	G	2	T/G	50.9/49.1	28/27	55	T	50.909	28	G	49.091	27	AATGGTTCAGTTTCTACAGA	AAAGTGATGTTAACACCATA	AATGGTTCAGTTTCTACAGA	AAAGTGATGTTAACACCATA	T	77187
1133-4_A2	WT	MMS	IV	778581	757160	SNP	1	A	2	A/G	50.0/50.0	16/16	32	A	50	16	G	50	16	CAGCTTATAAGGTTCTCGGA	CGTCAAAGATTCAAAGACTA	CAGCTTATAAGGTTCTCGGA	CGTCAAAGATTCAAAGACTA	G	422052
1133-4_A2	WT	MMS	IV	847119	825699	SNP	1	T	2	A/T	51.4/48.6	38/36	74	A	51.351	38	T	48.649	36	GTTTCTAAATCATCCCTGAA	CCAATTTCTAGCAATCTGTC	GTTTCTAAATCATCCCTGAA	CCAATTTCTAGCAATCTGTC	A	68538
1133-4_A2	WT	MMS	IV	869338	847918	SNP	1	G	2	G/A	52.3/47.7	34/31	65	G	52.308	34	A	47.692	31	ATTTTTGGTGGATGACGATC	TGTTTTGATCGGTAATAAAG	ATTTTTGGTGGATGACGATC	TGTTTTGATCGGTAATAAAG	A	22219
1133-4_A2	WT	MMS	IV	1269140	1230705	SNP	1	T	2	C/T	50.8/49.2	30/29	59	C	50.847	30	T	49.153	29	TATAAATAAATTCAAAACTT	GAACTATGAAGCAGGCGACA	TATAAATAAATTCAAAACTT	GAACTATGAAGCAGGCGACA	C	399802
1133-4_A2	WT	MMS	V	1906	1873	SNP	1	G	2	A/G	50.0/50.0	2018-07-07	14	A	50	7	G	50	7	TAGCACTAGTCCTGACGTTG	TGCTGGCAGTGGTAGTAGCA	TTGCACTAGTCCTGACGTTG	TGCTGGCAGTGGTAGTAGCA	A
1133-4_A2	WT	MMS	VII	181506	175146	SNP	1	A	2	A/G	50.0/50.0	34/34	68	A	50	34	G	50	34	ATGACACGGATTTCCGAATT	CCACCTCAAATACGTCAAGA	ATGACACGGATTTCCGAATT	CCACCTCAAATACGTCAAGA	G
1133-4_A2	WT	MMS	VII	250797	244437	SNP	1	A	2	A/T	50.0/50.0	34/34	68	A	50	34	T	50	34	CATCCAACTTTACCCATTAT	ATTTCTGGTTCCGAAGATGG	CATCCAACTTTACCCATTAT	ATTTCTGGTTCCGAAGATGG	T	69291
1133-4_A2	WT	MMS	VII	483713	477348	SNP	1	G	2	G/A	53.0/47.0	35/31	66	G	53.03	35	A	46.97	31	TCCTTTTTCTTCTAGCTTCC	TTCCGAGTCTCATCTTCTTT	TCCTTTTTCTTCTAGCTTCC	TTCCGAGTCTCATCTTCTTT	A	232916
1133-4_A2	WT	MMS	VII	883612	857487	SNP	1	C	2	C/T	52.2/47.8	36/33	69	C	52.174	36	T	47.826	33	AGCAATCTTCTTACCATCGA	AATGATGTGCTTGTCATCGT	AGCAATCTTCTTACCATCGA	AATGATGTGCTTGTCATCGT	T	399899
1133-4_A2	WT	MMS	VII	911286	885161	SNP	1	C	2	C/A	51.6/48.4	33/31	64	C	51.562	33	A	48.438	31	ATTAGAACCCTTCTTTTCAA	AACAGCTTTTAAGATTTTAG	ATTAGAACCCTTCTTTTCAA	AACAGCTTTTAAGATTTTAG	A	27674
1133-4_A2	WT	MMS	VII	920812	894687	SNP	1	G	2	T/G	53.1/46.9	26/23	49	T	53.061	26	G	46.939	23	GAATAAGAAGAGAAATATAT	AACAATCATTAAAACAGTTT	GAATAAGAAGAGAAATATAT	AACAATCATTAAAACAGTTT	T	9526
1133-4_A2	WT	MMS	VIII	552427	538156	SNP	1	A	2	T/A	51.1/48.9	24/23	47	T	51.064	24	A	48.936	23	CGGAGCATTGTCTTTCTTGA	CGATGACTACGAATTTTTCA	CGGAGCATTGTCTTTCTTGA	CGATGACTACGAATTTTTCA	T
1133-4_A2	WT	MMS	IX	300295	283979	SNP	1	C	2	A/C	53.1/46.9	34/30	64	A	53.125	34	C	46.875	30	CGCGCTACCGATTGCGCCAA	AAGGCTATTTCGTTGGAAAA	CGCGCTACCGATTGCGCCAA	AAGGCTATTTCGTTGGAAAA	A
1133-4_A2	WT	MMS	XIII	51954	47784	SNP	1	A	2	A/T	51.0/49.0	49/47	96	A	51.042	49	T	48.958	47	TCCTCAAAGGAATCCCTTCA	GAATCGCTCCATGAAGAGAA	TCCTCAAAGGAATCCCTACA	GAATCGCTCCATGAAGAGAA	T
1133-4_A2	WT	MMS	XIII	361298	347551	SNP	1	C	2	C/T	50.0/50.0	2018-05-05	10	C	50	5	T	50	5	GAATGATTAGTGTGATTTAC	GTAGATTCAGTAAGTTCCTG	GAATGATTAGTATGATTTAC	GTAGATTCAGTAAGTTCCTG	T	309344
1133-4_A2	WT	MMS	XIV	187881	178502	SNP	1	T	2	T/C	54.8/45.2	34/28	62	T	54.839	34	C	45.161	28	GACGACGCAGCGGCTGCTCG	ATAAAATGACGCGGTCGCGC	GACGACGCAGCGGCTGCTCG	ATAAAATGACGCGGTCGCGC	C
1133-4_A2	WT	MMS	XIV	240278	230903	SNP	1	C	2	C/T	54.4/45.6	43/36	79	C	54.43	43	T	45.57	36	AATTAGTTCTTCCTTTTCCT	GACCTTCCAGCTTGTAAAAT	AATTAGTTCTTCCTTTTCCT	GACCTTCCAGCTTGTAAAAT	T	52397
1133-4_A2	WT	MMS	XIV	568665	558421	SNP	1	A	2	G/A	50.9/49.1	29/28	57	G	50.877	29	A	49.123	28	TTCTCTGTCGTCATCTCCTA	GACGTTCATTTTTTTAGAGT	TTCTCTGTCGTCATCTCCTA	GACGTTCATTTTTTTAGAGT	G	328387
1133-4_A2	WT	MMS	XV	215615	212260	SNP	1	C	2	C/T	54.5/45.5	36/30	66	C	54.545	36	T	45.455	30	GAATGCCCCAACTTGCAGCC	GTATTTAACACAGACACTCT	GAATGCCCCAACTTGCAGCC	GTATTTAACACAGACACTCT	T
1133-4_A2	WT	MMS	XV	711868	703144	SNP	1	C	2	C/T	52.6/47.4	30/27	57	C	52.632	30	T	47.368	27	CGAAATTAGATAGTCATCGT	GGAATCATCTAGTTCTGAAC	CGAAATTAGATAGTCATCGT	GGAATCATCTAGTTCTGAAC	T	496253
1133-4_A2	WT	MMS	XV	756528	747802	SNP	1	G	2	G/C	51.7/48.3	31/29	60	G	51.667	31	C	48.333	29	AAGCGTCTATAGTTGCTAAA	AGGTGTATTCTATAGTGTCC	AAGCGTCTATAGTTGCTAAA	AGGTGTATTCTATAGTGTCC	C	44660
1133-4_A2	WT	MMS	XV	798451	789725	SNP	1	A	2	A/T	50.9/49.1	28/27	55	A	50.909	28	T	49.091	27	GGTATTTATTTTTCACTATC	TTTTTCTCTCGTTTATATAT	GGTATTTATTTTTCACTATC	TTTTTCTCTCGTTTATATAT	T	41923
1133-4_A2	WT	MMS	XV	800635	791909	SNP	1	C	2	C/T	50.0/50.0	32/32	64	C	50	32	T	50	32	TGCTGTTGGCACTGATATGC	ATTATCTTGTGAGCAGTGAG	TGCTGTTGGCACTGATATGC	ATTATCTTGTGAGCAGTGAG	T	2184
1133-4_A2	WT	MMS	XV	919330	910604	SNP	1	T	2	T/A	54.2/45.8	39/33	72	T	54.167	39	A	45.833	33	TATTGTTATTAGTTTCTTTC	TGTTTTTGGAGTTTGGTTTC	TATTGTTATTAGTTTCTTTC	TGTTTTTGGAGTTTGGTTTC	A	118695
1133-4_A2	WT	MMS	XVI	141023	128649	SNP	1	C	2	A/C	51.6/48.4	33/31	64	A	51.562	33	C	48.438	31	CTTCTTTGCAGCATTCATTT	TCTTTCTTGCTCCATGGTTA	CTTCTTTGCAGCATTCATTT	TCTTTCTTGCTCCATGGTTA	A
1133-4_A5	WT	MMS	II	727161	717501	SNP	1	A	2	A/G	52.7/47.3	39/35	74	A	52.703	39	G	47.297	35	TTCTTTCACAACAACACAAA	AAGGTGGAGAGAATAATTTG	TTCTTTCACAACAACACAAA	AAGGTGGAGAGAATAATTTG	G
1133-4_A5	WT	MMS	IV	184616	177908	SNP	1	A	2	T/A	51.6/48.4	32/30	62	T	51.613	32	A	48.387	30	CACACCTCAAATCTAATCGC	CTCGCATCTGTCGAGTATAT	CACACCTCAAATCTAATCGC	CTCGCATCTGTCGAGTATAT	T
1133-4_A5	WT	MMS	IV	194378	187671	SNP	1	T	2	T/G	51.5/48.5	35/33	68	T	51.471	35	G	48.529	33	GGTTGCTTCCGAATACATGC	GGCAGAATTTCAGGTTGTGT	GGTTGCTTCCGAATACATGC	GGCAGAATTTCAGGTTGTGT	G	9762
1133-4_A5	WT	MMS	IV	699049	678450	SNP	1	C	2	C/G	54.9/45.1	28/23	51	C	54.902	28	G	45.098	23	TTCATGGAAGCGTTGGAAGA	ATCATATCCTGTGATATTAG	TTCATGGAAGCGTTGGAAGA	ATCATATCCTGTGATATTAG	G	504671
1133-4_A5	WT	MMS	IV	817972	797374	SNP	1	A	2	A/T	54.0/46.0	34/29	63	A	53.968	34	T	46.032	29	GATGTTGCCAAGATCCATGA	ATTTATGACTGGAAGGAGAA	GATGTTGCCAAGATCCATGA	ATTTATGACTGGAAGGAGAA	T	118923
1133-4_A5	WT	MMS	IV	1325718	1288089	SNP	1	G	2	T/G	50.7/49.3	35/34	69	T	50.725	35	G	49.275	34	CTTCTCCTTTGGGACTTTTA	GTGCGTCTACTTGTTGAAAT	CTTCTCCTTTGGGACTTTTA	GTGCGTCTACTTGTTGAAAT	T	507746
1133-4_A5	WT	MMS	V	364824	364815	SNP	1	C	2	A/C	53.8/46.2	35/30	65	A	53.846	35	C	46.154	30	CGGACGTAAATTCGATGATC	AGAAGTGACGAACGATGCTA	CGGACGTAAATTCGATGATC	AGAAGTGACGAACGATGCTA	A
1133-4_A5	WT	MMS	VI	180996	175720	SNP	1	G	2	G/A	50.7/49.3	36/35	71	G	50.704	36	A	49.296	35	CGCAAGCCCGGAATCGAACC	GGGGCCCAACGATGGCAACG	CGCAAGCCCGGAATCGAACC	GGGGCCCAACGATGGCAACG	A
1133-4_A5	WT	MMS	VI	259611	254336	SNP	1	A	2	A/G	53.5/46.5	46/40	86	A	53.488	46	G	46.512	40	TAATATTCCATTTTGAATTG	CTTGATTTTTAGATTATTAT	TAATATTCCATTTTGAATTG	CTTGATTTTTAGATTATTAT	G	78615
1133-4_A5	WT	MMS	VII	453757	447316	SNP	1	T	2	T/A	53.8/46.2	35/30	65	T	53.846	35	A	46.154	30	TACTGGCCAAATTGATTGTT	CCGGATCATTCATCTTTTAT	TACTGGCCAAATTGATTGTT	CCGGATCATTCATCTTTTAT	A
1133-4_A5	WT	MMS	VII	845771	819654	SNP	1	G	2	T/G	54.9/45.1	28/23	51	T	54.902	28	G	45.098	23	AAATAGCTAAAAATAAGTAT	AAGTTATATTTTTAAACCTA	AAATAGCTAAAAATAAGTAT	AAGTTATATTTTTAAACCTA	T	392014
1133-4_A5	WT	MMS	VII	883131	857014	SNP	1	G	2	G/T	52.0/48.0	39/36	75	G	52	39	T	48	36	GGACTCTGAAAGCCATACCG	TCAACTTACCTTGCAATTCT	GGACTCTGAAAGCCATACCG	TCAACTTACCTTGCAATTCT	T	37360
1133-4_A5	WT	MMS	VII	958366	932249	SNP	1	C	2	C/A	53.4/46.6	39/34	73	C	53.425	39	A	46.575	34	GTTGCTTAAAAAAATAAAAA	CAAATTTTTCTACTTTGCTC	GTTGCTTAAAAAAATAAAAA	CAAATTTTTCTACTTTGCTC	A	75235
1133-4_A5	WT	MMS	VII	1033165	1007056	SNP	1	C	2	C/A	51.7/48.3	45/42	87	C	51.724	45	A	48.276	42	AAAGCTCTCAATCAATGATT	GTATTATCGGTCTATCAGCT	AAAGCTCTCAATCAATGATT	GTATTATCGGTCTATCAGCT	A	74799
1133-4_A5	WT	MMS	IX	383801	367986	SNP	1	T	2	A/T	54.9/45.1	39/32	71	A	54.93	39	T	45.07	32	TCTTCTCCGCTCTTGCTTAA	CTTATCCAGTTCGTTAGAAG	TCTTCTCCGCTCTTGCTTAA	CTTATCCAGTTCGTTAGAAG	A
1133-4_A5	WT	MMS	X	61515	47423	SNP	1	T	2	A/T	53.8/46.3	43/37	80	A	53.75	43	T	46.25	37	TCTAATATTGAAGATAATAC	GCTTTGCTGCATCATTCGCA	TCTAATATTGAAGATAATAC	GCTTTGCTGCATCATTCGCA	A
1133-4_A5	WT	MMS	X	350305	336213	SNP	1	C	2	T/C	54.8/45.2	34/28	62	T	54.839	34	C	45.161	28	TTCGTTGGATTGCTGAAAAA	TTTGGGAATTCTTTCTCTAT	TTCGTTGGATTGCTGAAAAA	TTTGGGAATTCTTTCTCTAT	T	288790
1133-4_A5	WT	MMS	X	489003	469259	SNP	1	A	2	A/G	53.2/46.8	33/29	62	A	53.226	33	G	46.774	29	TATAAATTCTTTTAACAATG	AGTTTTTTTCGGATCACAAA	TATAAATTCTTTTAACAATG	AGTTTTTTTCGGATCACAAA	G	138698
1133-4_A5	WT	MMS	X	607923	588178	SNP	1	T	2	T/A	53.0/47.0	35/31	66	T	53.03	35	A	46.97	31	GTGCATTCTATGAGTGATTT	TGTGACGGTGACGTACGATC	GTGCATTCTATGAGTGATTT	TGTGACGGTGACGTACGATC	A	118920
1133-4_A5	WT	MMS	XI	20687	20688	SNP	1	A	2	G/A	54.4/45.6	37/31	68	G	54.412	37	A	45.588	31	GGCCCTAGATCGTTGGCATC	GCGGTTACCTAACCGAAGTG	GGCCCTAGATCGTTGGCATC	GCGGTTACCTAACCGAAGTG	G
1133-4_A5	WT	MMS	XI	652645	652384	SNP	1	T	2	T/A	53.7/46.3	44/38	82	T	53.659	44	A	46.341	38	ATATCTTCCTGGGTTTCATC	TTACTAGAACTGACGGTCAA	ATATCTTCCTGGGTTTCATC	TTACTAGAACTGACGGTCAA	A	631958
1133-4_A5	WT	MMS	XI	664115	663854	SNP	1	C	2	A/C	54.8/45.2	46/38	84	A	54.762	46	C	45.238	38	ATCCTTTAAATTAGCTGCCA	AATGATAGCTACCTCCGCGA	ATCCTTTAAATTAGCTGCCA	AATGATAGCTACCTCCGCGA	A	11470
1133-4_A5	WT	MMS	XII	194785	187522	SNP	1	A	2	T/A	52.1/47.9	37/34	71	T	52.113	37	A	47.887	34	GGGCTATGCAGGAAGGTGCT	AGGCAATGAAAACTATTCAC	GGGCTATGCAGGAAGGTGCT	AGGCAATGAAAACTATTCAC	T
1133-4_A5	WT	MMS	XIII	341025	327432	SNP	1	G	2	A/G	52.7/47.3	29/26	55	A	52.727	29	G	47.273	26	CGGAAGGAGAGCGAGGCTAA	TTCCGAGCTACTGAAAAAAA	CGGAAGGAGAGCGAGGCTAA	TTCCGAGCTACTGAAAAAAA	A
1133-4_A5	WT	MMS	XIII	348436	334843	SNP	1	A	2	A/T	52.9/47.1	36/32	68	A	52.941	36	T	47.059	32	AAAATGCTTAGTAAGCGCAA	ATTTTTTTTTGATAGTATAT	AAAATGCTTAGTAAGCGCAA	TTTTTTTTTGATAGTATATT	T	7411
1133-4_A5	WT	MMS	XIV	45506	39833	SNP	1	C	2	C/T	54.3/45.7	44/37	81	C	54.321	44	T	45.679	37	ACCAAATCTTCACAAGCATC	ACTGTATCATTCCAAACCTT	ACCAAATCTTCACAAGCATC	ACTGTATCATTCCAAACCTT	T
1133-4_A5	WT	MMS	XIV	126209	116561	SNP	1	G	2	A/G	52.2/47.8	36/33	69	A	52.174	36	G	47.826	33	ATGAATAATGGGGGTGTTGT	ACAGGAGATTATACGAGCTT	ATGAATAATGGGGGTGTTGT	ACAGGAGATTATACGAGCTT	A	80703
1133-4_A5	WT	MMS	XIV	127595	117947	SNP	1	C	2	C/T	51.4/48.6	36/34	70	C	51.429	36	T	48.571	34	AAATTGAATCATCCACTGCC	ATATGCCAATATGAGTCCAA	AAATTGAATCATCCACTGCC	ATATGCCAATATGAGTCCAA	T	1386
1133-4_A5	WT	MMS	XIV	318507	308857	SNP	1	G	2	G/A	54.7/45.3	35/29	64	G	54.688	35	A	45.312	29	TCTTCGGGTTTCATCTTAGT	ACATTGGACAAATGTTTGCT	TCTTCGGGTTTCATCTTAGT	ACATTGGACAAATGTTTGCT	A	190912
1133-4_A5	WT	MMS	XIV	684413	673862	SNP	1	G	2	T/G	51.6/48.4	48/45	93	T	51.613	48	G	48.387	45	CCAATCCAATTTGCCCTTTA	ATAATTTAGGCTCATCGAAA	CCAATCCAATTTGCCCTTTA	ATAATTTAGGCTCATCGAAA	T	365906
1133-4_A5	WT	MMS	XVI	140717	127833	SNP	1	C	2	T/C	51.4/48.6	36/34	70	T	51.429	36	C	48.571	34	GACAATACCGAACTTTATTT	GGTCGGCAATAAACCACCCA	GACAATACCGAACTTTATTT	GGTCGGCAATAAACCACCCA	T
1133-4_A5	WT	MMS	XVI	570646	553880	SNP	1	T	2	A/T	50.6/49.4	41/40	81	A	50.617	41	T	49.383	40	TAAAGGTGTCCCCTGATGGC	CACTATATCATCTAAGTCCA	TAAAGGTGTCCCCTGATGGC	CACTATATCATCTAAGTCCA	A	429929
1133-4_A5	WT	MMS	XVI	747700	730934	SNP	1	G	2	G/A	54.5/45.5	30/25	55	G	54.545	30	A	45.455	25	AAGATATCTTGAACAGCAAA	AAGTGTCAAAAACGTTTCTA	AAGATATCTTGAACAGCAAA	AAGTGTCAAAAACGTTTCTA	A	177054
1133-4_A5	WT	MMS	I	226193	209050	DIP	1	A	2	-/A	50.0/50.0	2018-11-11	22	-	50	11	A	50	11	TGCCAAGAGATTAAACAAGG	AAACAAGGGTTTGAATCTGA	TGCCAAGAGATTAAACAAGG	AAACAAGGGTTTGAATCTGA	-
1133-4_A5	WT	MMS	IV	612122	597118	DIP	1	C	2	-/C	51.0/46.9	25/23	49	-	51.02	25	C	46.939	23	TATTAAGACAAAAACCGTCG	TTTTGATAACAAGACTAATA	TATTAAGACAAAAACCGTCG	TTTTGATAACAAGACTAATA	-
1133-4_A5	WT	MMS	XIII	924371	899991	DIP	1	T	2	T/-	50.0/35.7	14/10	28	T	50	14	-	35.714	10	TGGTGTGTGGGTGTGGTGTG	GGGTGTGTGTGGGTGTGGTG	TGGTGTGTGGGTGTGGTGTG	GGGTGTGTGTGGGTGTGGTG	-
1133-4_A6	WT	MMS	I	24603	24607	SNP	1	A	2	G/A	54.4/45.6	56/47	103	G	54.369	56	A	45.631	47	GTGTATTCTGTGGTAACGCC	TTAATAGTAGCAGTGCTTGT	GTGTATTCTGTGGTAACGCC	TTAATAGTAGCAGTGCTTGT	G
1133-4_A6	WT	MMS	II	650396	641076	SNP	1	A	2	C/A	52.2/47.8	35/32	67	C	52.239	35	A	47.761	32	ATCGCTACAGCTAGCCCATC	ATTAAAAGACAAGAAAATAC	ATCGCTACAGCTAGCCCATC	ATTAGAAGACAAGAGAATAC	C
1133-4_A6	WT	MMS	V	250325	250310	SNP	1	C	2	A/C	52.4/47.6	44/40	84	A	52.381	44	C	47.619	40	TATCACTTTCGGTTTTGATC	GGACAACCCCGGTTCGAATC	TATCACTTTCGGTTTTGATC	GGACAACCCCGGTTCGAATC	A
1133-4_A6	WT	MMS	VI	181009	175690	SNP	1	T	2	T/G	53.8/46.2	49/42	91	T	53.846	49	G	46.154	42	TCGAACCGGGGGCCCAACGA	GGCAACGTTGGATTTTACCA	TCGAACCGGGGGCCCAACGA	GGCAACGTTGGATTTTACCA	G
1133-4_A6	WT	MMS	VII	82426	76040	SNP	1	C	2	C/T	51.8/48.2	44/41	85	C	51.765	44	T	48.235	41	AAATGACGAATTTGCAAAAT	ACATTTCCTAACAACTCAGT	AAATGACGAATTTGCAAAAT	ACATTTCCTAACAACTCAGT	T
1133-4_A6	WT	MMS	VII	737292	720735	SNP	1	G	2	T/G	53.1/46.9	52/46	98	T	53.061	52	G	46.939	46	TGATTACCTCTGTTCAAAAA	AAATTATTTGGATGTAATAT	TGATTACCTCTGTTCAAAAA	AAATTATTTGGATGTAATAT	T	654866
1133-4_A6	WT	MMS	VIII	86789	85669	SNP	1	C	2	C/T	53.6/46.4	15/13	28	C	53.571	15	T	46.429	13	CATGGGAACCTTACATGAAT	CTTAAGAAATTCTGTGAAAC	CATGGGAACCTTACATGAAT	CTTAAGAAATTCTGTGAAAC	T
1133-4_A6	WT	MMS	IX	60220	43833	SNP	1	G	2	C/G	52.1/47.9	50/46	96	C	52.083	50	G	47.917	46	ACCATTTGAAGCGACTAATG	CTCGTCAGCTCTCATTTGTG	ACCATTTGAAGCGACTAATG	CTCGTCAGCTCTCATTTGTG	C
1133-4_A6	WT	MMS	IX	377100	360717	SNP	1	T	2	T/C	50.7/49.3	38/37	75	T	50.667	38	C	49.333	37	CGATGACCACTCACAAGTGA	TAATCCTCAACAGCTGTTGA	CGATGACCACTCACAAGTGA	TAATCCTCAACAGCTGTTGA	C	316880
1133-4_A6	WT	MMS	XI	430135	430149	SNP	1	T	2	T/C	51.3/48.7	40/38	78	T	51.282	40	C	48.718	38	ATGCCTGCCTTATTCCATTC	CTTCCTATTTCTTAAATTGA	ATGCCTGCCTTATTCCATTC	CTTCCTATTTCTTAAATTGA	C
1133-4_A6	WT	MMS	XI	640481	640238	SNP	1	T	2	T/C	54.8/45.2	46/38	84	T	54.762	46	C	45.238	38	TATAAGAATGAGAACAATAA	GTCAATAATCACACGTCGTT	TATAAGAATGAGAACAATAA	GTCAATAATCACACGTCGTT	C	210346
1133-4_A6	WT	MMS	XII	274282	263355	SNP	1	G	2	G/A	52.7/47.3	39/35	74	G	52.703	39	A	47.297	35	TTTCTGCTAGAGACTAGCTC	ATGGAGTCACTATAATCACC	TTTCTGCTAGAGACTAGCTC	ATGGAGTCACTATAATCACC	A
1133-4_A6	WT	MMS	XIV	16562	10911	SNP	1	A	2	A/C	53.4/46.6	47/41	88	A	53.409	47	C	46.591	41	TCCCATGGGGCTAGAGCCAT	CCAAAATGCCTAGCCATTGG	TCCCATGGGGCTAGAGCCAT	CCAAAATGCCTAGCCATTGG	C
1133-4_A6	WT	MMS	XIV	42866	37215	SNP	1	A	2	A/G	54.1/45.9	53/45	98	A	54.082	53	G	45.918	45	TCACGCAAGAGATCATAGGA	AAAACTACTTGTCCATTGGT	TCACGCAAGAGATCATAGGA	AAAACTACTTGTCCATTGGT	G	26304
1133-4_A6	WT	MMS	XIV	491020	481170	SNP	1	G	2	G/A	50.6/49.4	45/44	89	G	50.562	45	A	49.438	44	GCTGAAGCGCAACCAGACAA	TCTTATGGGCTGGCCCGCCA	GCTGAAGCGCAACCAGACAA	TCTTATGGGCTGGCCCGCCA	A	448154
1133-4_A6	WT	MMS	XV	293728	290369	SNP	1	C	2	T/C	53.7/46.3	44/38	82	T	53.659	44	C	46.341	38	GGTGTTCGGAAATCATTGAG	GAAAAAGTAACTACAGACAG	GGTGTTCGGAAATCATTGAG	GAAAAAGTAACTACAGACAG	T
1133-4_A6	WT	MMS	XV	543362	540003	SNP	1	G	2	G/A	52.3/47.7	46/42	88	G	52.273	46	A	47.727	42	TATACAAACCGGAGGTGCGG	TAAATATCTCCATATGTAAG	TATACAAACCGGAGGTGCGG	TAAATATCTCCATATGTAAG	A	249634
1133-4_A6	WT	MMS	XV	620624	612819	SNP	1	C	2	C/G	53.7/46.3	44/38	82	C	53.659	44	G	46.341	38	CGAAACTTTGGTTACAGTAG	GAGGTTGAAAACCCCACAGA	CGAAACTTTGGTTACAGTAG	GAGGTTGAAAACCCCACAGA	G	77262
1133-4_A6	WT	MMS	XV	733443	724656	SNP	1	T	2	A/T	51.6/48.4	33/31	64	A	51.562	33	T	48.438	31	ATATGAGTTTTCCGTCTTTT	GTCGCAGCAACCATTTTTCA	ATATGAGTTTTCCGTCTTTT	GTCGCAGCAACCATTTTTCA	A	112819
1133-4_A6	WT	MMS	XV	971432	962645	SNP	1	A	2	A/G	54.5/45.5	2018-06-05	11	A	54.545	6	G	45.455	5	GCTGATACATTTGAAATTAC	GTCAGCACGATCATTCAAAG	GCTGATACATTTGAAATTAC	GTCAGCACGATCATTCAAAG	G	237989
1133-4_A6	WT	MMS	XVI	95090	82286	SNP	1	G	2	A/G	52.9/47.1	45/40	85	A	52.941	45	G	47.059	40	TATTGCCTGGTTTCGAAGGA	AGCCTGAATATGCTGTCATT	TATTGCCTGGTTTCGAAGGA	AGCCTGAATATGCTGTCATT	A
1133-4_A6	WT	MMS	XVI	598650	582203	SNP	1	T	2	T/C	50.7/49.3	38/37	75	T	50.667	38	C	49.333	37	TGTTTGTTGTATTGACGAGT	TGATAAAATGAGTGATTCTA	TGTTTGTTGTATTGACGAGT	TGATAAAATGAGTGATTCTA	C	503560
1133-4_A6	WT	MMS	VIII	25718	25721	DIP	1	C	2	C/-	52.3/47.7	57/52	109	C	52.294	57	-	47.706	52	TTTCTATTCCACCTTTAGTT	CCCAACTTCACCTCTTATCG	TTTCTATTCCACCTTTAGTT	CCCAACTTCACCTCTTATCG	-
1133-4_A7	WT	MMS	I	206162	198253	Complex SNP	1	A	2	T/G	54.5/36.4	2018-06-04	11	T	54.545	6	G	36.364	4	ACCGGTACTTTCACTTCTAC	TCTACTGAAATGACGCACGT	AATGGCACTTTCACTTCGAC	TCCACTGAAATGAC-CACCG	T
1133-4_A7	WT	MMS	II	213828	211596	SNP	1	A	2	A/G	51.9/48.1	40/37	77	A	51.948	40	G	48.052	37	CAATGGAGCGGGAGCAGATG	AACCGGAGCAGATGAAACCG	CAATGGAGCGGGAGCAGATG	AACCGGAGCAGATGAAACCG	G
1133-4_A7	WT	MMS	II	292605	283846	SNP	1	G	2	A/G	50.0/50.0	39/39	78	A	50	39	G	50	39	GACTCCTGTATTGCTATTGT	ATGTTTTTTTATTGTACAGT	GACTCCTGTATTGCTATTGT	ATGTTTTTTTATTGTACAGT	A	78777
1133-4_A7	WT	MMS	II	438609	429850	SNP	1	G	2	G/T	52.7/47.3	39/35	74	G	52.703	39	T	47.297	35	CAAGAATTTACATTTGCTCA	CACTGCAATGATAACTCAAT	CAAGAATTTACATTTGCTCA	CACTGCAATGATAACTCAAT	T	146004
1133-4_A7	WT	MMS	II	500809	491318	SNP	1	A	2	G/A	51.6/48.4	47/44	91	G	51.648	47	A	48.352	44	ACAAATGGAAATAAGCAGAT	CAAAACTACTTGAACGGCGA	ACAAATGGAAATAAGCAGAT	CAAAACTACTTGAACGGCGA	G	62200
1133-4_A7	WT	MMS	II	539883	530392	SNP	1	T	2	A/T	51.5/48.5	35/33	68	A	51.471	35	T	48.529	33	ATATAAAGTGAGCCTCGTAA	ACAGGGGTAAAAAGGAAAGA	ATATAAAGTGAGCCTCGTAA	ACAGGGGTAAAAAGGAAAGA	A	39074
1133-4_A7	WT	MMS	III	83084	82287	SNP	1	T	2	T/C	52.4/47.6	33/30	63	T	52.381	33	C	47.619	30	GGTGAATTTTGAGATAGTTG	TGGGATTCCATTGTTGATAA	GGTGAATTTTGAGATAGTTG	TGGGATTCCATTGTTGATAA	C
1133-4_A7	WT	MMS	IV	231462	224922	SNP	1	A	2	A/G	51.5/48.5	35/33	68	A	51.471	35	G	48.529	33	GAAGGTATGCAGTTGAGACA	ACTTGTTGAAAAAAGAGGTA	GAAGGTATGCAGTTGAGACA	ACTTGTTGAAAAAAGAGGTA	G
1133-4_A7	WT	MMS	IV	596720	581551	SNP	1	C	2	T/C	51.9/48.1	40/37	77	T	51.948	40	C	48.052	37	AGGCATATATATAATAGTCT	AACCCACCATTTTCGAAGAT	AGGCATATATATAATAGTCT	AACCCACCATTTTCGAAGAT	T	365258
1133-4_A7	WT	MMS	V	125744	125737	SNP	1	A	2	A/T	50.0/50.0	41/41	82	A	50	41	T	50	41	GTCGAGGTTATTTGGTCTAA	TTCGCTACTCGTGAAATTAT	GTCGAGGTTATTTGGTCTAA	TTCGCTACTCGTGAAATTAT	T
1133-4_A7	WT	MMS	VII	104364	97869	SNP	1	T	2	A/T	51.1/48.9	45/43	88	A	51.136	45	T	48.864	43	TCTAATTTTTCGATATAGCT	GAAACCTTAGTTGGTTCATA	TCTAATTTTTCGATATAGCT	GAAACCTTAGTTGGTTCATA	A
1133-4_A7	WT	MMS	VII	623302	607619	SNP	1	A	2	G/A	50.8/49.2	31/30	61	G	50.82	31	A	49.18	30	ACAAATGAGGAAGAATGATG	AGTAAGCACGAGGTCGATAC	ACAAATGAGGAAGAATGATG	AGTAAGCACGAGGTCGATAC	G	518938
1133-4_A7	WT	MMS	VII	707161	691481	SNP	1	A	2	A/T	51.0/49.0	25/24	49	A	51.02	25	T	48.98	24	GATTTGCAATCTGCTGCGCT	CCACTGCGCCATACGAGCTT	GATTTGCAATCTGCTGCGCT	CCACTGCGCCATACGAGCTT	T	83859
1133-4_A7	WT	MMS	VIII	388969	381085	SNP	1	A	2	A/T	54.0/46.0	47/40	87	A	54.023	47	T	45.977	40	GCAGGAAGTCGCCCAAAGCG	GAATCATACCACTAGACCAC	GCAGGAAGTCGCCCAAAGCG	GAATCATACCACTAGACCAC	T
1133-4_A7	WT	MMS	VIII	459701	451817	SNP	1	A	2	A/G	54.5/45.5	42/35	77	A	54.545	42	G	45.455	35	TAAATCTTGTCATGGGGGCA	GTCCAAATTCTAGCGAAGGT	TAAATCTTGTCATGGGGGCA	GTCCAAATTCTAGCGAAGGT	G	70732
1133-4_A7	WT	MMS	IX	99405	82612	SNP	1	T	2	C/T	51.9/48.1	40/37	77	C	51.948	40	T	48.052	37	CCATCAATGACAACAACTGG	TCAACAGACATTTTCTCGAT	CCATCAATGACAACAACTGG	TCAACAGACATTTTCTCGAT	C
1133-4_A7	WT	MMS	IX	417252	400462	SNP	1	A	2	T/A	52.3/46.6	46/41	88	T	52.273	46	A	46.591	41	CAACGGATAACAACCAATTG	GCAAAGACGAAAATATGCCA	CAACGGATAACAACCAATTG	GCAAAGACGAAAATATGCCA	T	317847
1133-4_A7	WT	MMS	X	429997	415662	SNP	1	C	2	T/C	52.2/47.8	24/22	46	T	52.174	24	C	47.826	22	TGCCATGGCTTACGGCTGTA	AGAGAATATTACAATTTTGT	TGCCATGGCTTACGGCTGTA	AGAGAATATTACAATTTTGT	T
1133-4_A7	WT	MMS	X	540595	520688	SNP	1	T	2	T/C	51.4/48.6	37/35	72	T	51.389	37	C	48.611	35	ACTTCGCATGGCATTATGTA	CATTGCAGCGTAAATTTTTA	ACTTCGCATGGCATTATGTA	CATTGCAGCGTAAATTTTTA	C	110598
1133-4_A7	WT	MMS	X	590219	570312	SNP	1	G	2	G/A	50.7/49.3	38/37	75	G	50.667	38	A	49.333	37	AAAGGAAGTTCATTTAATGA	GGCAACAACGAAAAAGAACC	AAAGGAAGTTCATTTAATGA	GGCAACAACGAAAAAGAACC	A	49624
1133-4_A7	WT	MMS	X	744316	717791	SNP	1	G	2	G/C	50.6/49.4	40/39	79	G	50.633	40	C	49.367	39	TTGGTTTACATTTAAGGTGC	ACCAGCAATGTCACTGCTCG	TTGGTTTACATTTAAGGTGC	ACCAGCAATGTCACTGCTCG	C	154097
1133-4_A7	WT	MMS	XII	232187	220587	SNP	1	A	2	A/G	54.4/45.6	31/26	57	A	54.386	31	G	45.614	26	TTCCAACGAAAAGAATATAC	TATCGTTTAAGAGAAATTCT	TTCCAACGAAAAGAATATAC	TATCGTTTAAGAGAAATTCT	G
1133-4_A7	WT	MMS	XII	890785	837563	SNP	1	C	2	T/C	54.5/45.5	36/30	66	T	54.545	36	C	45.455	30	TTCAATGGCACGCACTCTTT	ATCTTCCACACCCTCCTCTA	TTCAATGGCACGCACTCTTT	ATCTTCCACACCCTCCTCTA	T	658598
1133-4_A7	WT	MMS	XIII	733725	715191	SNP	1	C	2	A/C	52.1/47.9	37/34	71	A	52.113	37	C	47.887	34	TAAAAGTTGTCAAATTAAAT	AATCGCAAGTAATACATGAA	TAAAAGTTGTCAAATTAAAT	AATCGCAAGTAATACATGAA	A
1133-4_A7	WT	MMS	XIII	747001	728467	SNP	1	C	2	A/C	50.0/50.0	41/41	82	A	50	41	C	50	41	CATATTTGGAGGTTGCTGAA	AGGTTTTCGACTGGCTAGTG	CATATTTGGAGGTTGCTGAA	AGGTTTTCGACTGGCTAGTG	A	13276
1133-4_A7	WT	MMS	XIV	108640	99208	SNP	1	A	2	A/G	54.8/45.2	40/33	73	A	54.795	40	G	45.205	33	GGTGACTCCAACGTATCTCA	AGGAAGGGCAAGCCGATTTG	GGTGACTCCAACGTATCTCA	AGGAAGGGCAAGCCGATTTG	G
1133-4_A7	WT	MMS	XIV	111617	102185	SNP	1	A	2	G/A	53.8/46.2	42/36	78	G	53.846	42	A	46.154	36	CCAGGTTAAGAATACAACCA	GAACCTGATCTCGGTTCCCT	CCAGGTTAAGAATACAACCA	GAACCTGATCTCGGTTCCCT	G	2977
1133-4_A7	WT	MMS	XIV	210758	201328	SNP	1	A	2	A/T	51.6/48.4	47/44	91	A	51.648	47	T	48.352	44	GGCCACGTAAAACAAAACAA	GGGACAATGATAACAAGGTT	GGCCACGTAAAACAAAACAA	GGGACAATGATAACAAGGTT	T	99141
1133-4_A7	WT	MMS	XIV	390961	381529	SNP	1	C	2	C/T	52.4/47.6	44/40	84	C	52.381	44	T	47.619	40	GGCCCGAGGCGATTTCAATC	TATGGCAGGTGTAGGGTTTC	GGCCCGAGGCGATTTCAATC	TATGGCAGGTGTAGGGTTTC	T	180203
1133-4_A7	WT	MMS	XIV	592470	582219	SNP	1	C	2	A/C	53.8/46.3	43/37	80	A	53.75	43	C	46.25	37	AAGGTCATTGGAAATATCCT	GCTTAATACCAACTCAGATA	AAGGTCATTGGAAATATCCT	GCTTAATACCAACTCAGATA	A	201509
1133-4_A7	WT	MMS	XV	158359	154898	SNP	1	T	2	T/C	51.6/48.4	47/44	91	T	51.648	47	C	48.352	44	GTGTCCCCTGCAGATGGGTC	GAATTTTTCATATTAACATG	GTGTCCCCTGCAGATGGGTC	GAATTTTTCATATTAACATG	C
1133-4_A7	WT	MMS	XV	459385	455924	SNP	1	T	2	T/C	51.4/48.6	36/34	70	T	51.429	36	C	48.571	34	TGAGGATCGATCTGGTAGTA	TCCCAAATTGTAAGATCTGT	TGAGGATCGATCTGGTAGTA	TCCCAAATTGTAAGATCTGT	C	301026
1133-4_A7	WT	MMS	XVI	203468	190708	SNP	1	A	2	A/G	51.8/48.2	44/41	85	A	51.765	44	G	48.235	41	GGCCCTGTTGTGGGTAGTGA	GATATGGAGAAAGCGGAAGT	GGCCCTGTTGTGGGTAGTGA	GATATGGAGAAAGCGGAAGT	G
1133-4_A7	WT	MMS	XVI	906960	879812	SNP	1	G	2	G/T	51.6/48.4	32/30	62	G	51.613	32	T	48.387	30	CCACGTACGTATTTGAACCG	AGTGAGCCGTTTGCGTGTTA	CCACGTACGTATTTGAACCG	AGTGAGCCGTTTGCGTGTTA	T	703492
1133-4_A7	WT	MMS	III	50451	49654	DIP	1	G	2	G/-	51.1/48.9	24/23	47	G	51.064	24	-	48.936	23	AGTGAGAGAAAAGGGAAAAA	AGGCGCCGCCCGACAGGGTA	AGTGAGAGAAAAGGGAAAAA	AGGCGCCGCCCGACAGGGTA	-
1133-4_A7	WT	MMS	XV	616228	608369	DIP	1	T	2	T/-	53.1/46.9	43/38	81	T	53.086	43	-	46.914	38	TCTTCGGCAATTAATTCATA	TTCAGTTCCCTACCTGGAAC	TCTTCGGCAATTAATTCATA	TTCAGTTCCCTACCTGGAAC	-
1133-4_A8	WT	MMS	I	42751	41868	SNP	1	A	2	A/G	54.4/45.6	37/31	68	A	54.412	37	G	45.588	31	GTTTCTTGTAACAGTATGTA	AGAATAAATAATTATAAGTA	GTTTCTTGTAACAGTATGTA	AGAATAAATAATTATAAGTA	G
1133-4_A8	WT	MMS	I	189245	185923	SNP	1	A	2	A/G	50.0/50.0	77/77	154	A	50	77	G	50	77	ATTAATAATAAATAATAATA	AAAGTACAGTAGCATTAAAT	ATTAATAATAAATAATAATA	AAAGTACAGTAGCATTAAAT	G	146494
1133-4_A8	WT	MMS	II	8453	6640	SNP	1	A	2	G/A	52.5/47.5	53/48	101	G	52.475	53	A	47.525	48	AACGGTTTCCATGCAAAGCA	CATCTTTGTTACTCATTCCT	AACGGTTTCCATGCAAAGCA	CATCTTTGTTACTCATTCCT	G
1133-4_A8	WT	MMS	II	237230	234870	SNP	1	G	2	A/G	51.7/48.3	46/43	89	A	51.685	46	G	48.315	43	ATCAGTTCTAGTCCCAACAC	AATATCAGTGTGTACTCTAA	ATCAGTTCTAGTCCCAACAC	AATATCAGTGTGTACTCTAA	A	228777
1133-4_A8	WT	MMS	II	654462	644999	SNP	1	A	2	G/A	51.8/48.2	43/40	83	G	51.807	43	A	48.193	40	GCAATACTACCAAAGCCAAC	ACGACCAAGACATCAAAAAA	GCAATACTACCAAAGCCAAC	ACGACAAAGACATCAAAAAA	G	417232
1133-4_A8	WT	MMS	II	681925	672465	SNP	1	C	2	T/C	51.9/48.1	27/25	52	T	51.923	27	C	48.077	25	CTGATAACAAGTAAAGTACT	ATCGATGAAAAAATGAATGT	CTGATAACAAGTAAAGTACT	ATCGATGAAAAAATGAATGT	T	27463
1133-4_A8	WT	MMS	II	747950	738486	SNP	1	C	2	C/G	51.1/48.9	46/44	90	C	51.111	46	G	48.889	44	AAAAGATATAAAAATACCAG	TATAACAAAAATCCATGTAA	AAAAGATATAAAAATACCAG	TATAACAAAAATCCATGTAA	G	66025
1133-4_A8	WT	MMS	II	777579	768117	SNP	1	A	2	A/T	53.5/46.5	54/47	101	A	53.465	54	T	46.535	47	GCTCCATCATCGGAAGAATG	TTTTACCTTCTTGCTTCCTT	GCTCCATCATCGGAAGAATG	TTTTACCTTCTTGCTTCCTT	T	29629
1133-4_A8	WT	MMS	III	142768	140254	SNP	1	G	2	T/G	54.0/46.0	27/23	50	T	54	27	G	46	23	ATTTTACCACTAAACCACTT	CGCTAGTAATCTTGATACAT	ATTTTACCACTAAACCACTT	CGCTAGTAATCTTGATACAT	T
1133-4_A8	WT	MMS	IV	280061	273479	SNP	1	C	2	T/C	52.2/47.8	48/44	92	T	52.174	48	C	47.826	44	AAAGGTGCGCTGGTAACTTA	ATAGTGAAGTTTTGTGTTCA	AAAGGTGCGCTGGTAACTTA	ATAGTGAAGTTTTGTGTTCA	T
1133-4_A8	WT	MMS	IV	907632	884974	SNP	1	T	2	C/T	51.9/48.1	40/37	77	C	51.948	40	T	48.052	37	GGTGGTAAAGTGAATAAGTA	TTTTATTGTGATAACAAGGG	GGTGGTAAAGTGAATAAGTA	TTTTATTGTGATAACAAGGG	C	627571
1133-4_A8	WT	MMS	IV	920438	897780	SNP	1	T	2	C/T	53.1/46.9	52/46	98	C	53.061	52	T	46.939	46	AGAAGAGTGTCGCATAGTGA	ACTAATTCTAGCAAACCCAA	AGAAGAGTGTCGCATAGTGA	ACTAATTCTAGCAAACCCAA	C	12806
1133-4_A8	WT	MMS	V	192172	192144	SNP	1	G	2	A/G	50.5/49.5	46/45	91	A	50.549	46	G	49.451	45	TCATGCACATCGCTGGCTCC	GGTAGTACACGAAGCTGCAA	TCATGCACATCGCTGGCTCC	GGTAGTACACGAAGCTGCAA	A
1133-4_A8	WT	MMS	VII	1025043	999403	SNP	1	T	2	T/A	51.6/48.4	48/45	93	T	51.613	48	A	48.387	45	AAAAGAGTTAAAAACTCTTC	CTTGTTTTATGAGCCCTAAA	AAAAGAGTTAAAAACTCTTC	CTTGTTTTATGAGCCCTAAA	A
1133-4_A8	WT	MMS	X	28617	14723	SNP	1	G	2	G/C	51.3/48.7	59/56	115	G	51.304	59	C	48.696	56	ACCGGTGAAAACACACGCAA	CAAACTTCAAAGTACATTGA	ACCGGTGAAAACACACGCAA	CAAACTTCAAAGTACATTGA	C
1133-4_A8	WT	MMS	X	253117	239222	SNP	1	T	2	T/C	54.4/45.6	49/41	90	T	54.444	49	C	45.556	41	GCACCATCATCTTCTGCAGG	GTAGATAAGGATTTGCGAAC	GCACCATCATCTTCTGCAGG	GTAGATAAGGATTTGCGAAC	C	224500
1133-4_A8	WT	MMS	XI	300418	300424	SNP	1	G	2	G/A	52.8/47.2	47/42	89	G	52.809	47	A	47.191	42	AATGAAACGATCCTTGGTCC	ACTACGGTGGCATCACTACT	AATGAAACGATCCTTGGTCC	ACTACGGTGGCATCACTACT	A
1133-4_A8	WT	MMS	XI	572576	572353	SNP	1	C	2	C/A	50.6/49.4	40/39	79	C	50.633	40	A	49.367	39	AGTGAAAAAAGAGGAGGGAC	TAAAAAACTAGGGAAGATTT	AGTGAAAAAAGAGGAGGGAC	TAAAAAACTGGGAAAGATTT	A	272158
1133-4_A8	WT	MMS	XI	617124	616879	SNP	1	C	2	A/C	50.0/50.0	41/41	82	A	50	41	C	50	41	AACACCCCAAATCATGTCCA	GTTTGCTGGCAAATACCCGC	AACACCCCAAATCATGTCCA	GTTTGCTGGCAAATACCCGC	A	44548
1133-4_A8	WT	MMS	XII	294006	282647	SNP	1	C	2	C/G	51.3/48.8	41/39	80	C	51.25	41	G	48.75	39	CCAAAGGCCATAGGGCCTAG	ATTTTCTTTGTTAAAAAAGA	CCAAAGGCCATAGGGCCTAG	ATTTTCTTTGTTAAAAAAGA	G
1133-4_A8	WT	MMS	XII	489880	445074	SNP	1	T	2	T/A	54.0/46.0	81/69	150	T	54	81	A	46	69	CCCACTCAAAATGACATTGC	ATCCGCCGGCAAGCACCCAA	CCCACTCAAAATGACATTGC	ATCCGCCGGCAAGCACCCAA	A	195874	Complex
1133-4_A8	WT	MMS	XII	489883	445077	SNP	1	C	2	C/T	52.3/47.7	80/73	153	C	52.288	80	T	47.712	73	ACTCAAAATGACATTGCTAT	CGCCGGCAAGCACCCAAGGC	ACTCAAAATGACATTGCTAT	CGCCGGCAAGCACCCAAGGC	T	3	Complex
1133-4_A8	WT	MMS	XII	489888	445082	SNP	1	G	2	G/A	51.5/48.5	87/82	169	G	51.479	87	A	48.521	82	AAATGACATTGCTATCCGCC	GCAAGCACCCAAGGCCTTTC	AAATGACATTGCTATCCGCC	GCAAGCACCCAAGGCCTTTC	A	5	Complex
1133-4_A8	WT	MMS	XIII	482041	464731	SNP	1	T	2	C/T	51.7/48.3	46/43	89	C	51.685	46	T	48.315	43	TTATGTGACAGCACTTGCGT	ATTGTCAGCCGGAGTATGTC	TTATGTGACAGCACTTGCGT	ATTGTCAGCCGGAGTATGTC	C
1133-4_A8	WT	MMS	XIII	591075	573745	SNP	1	C	2	A/C	50.0/50.0	41/41	82	A	50	41	C	50	41	AAAAATGGTGTTGATTTTTC	TCTGTATCCACTTCGTTATC	AAAAATGGTGTTGATTTTTC	TCTGTATCCATTTCGTTATC	A	109034
1133-4_A8	WT	MMS	XIV	459124	449636	SNP	1	T	2	A/T	52.6/47.4	50/45	95	A	52.632	50	T	47.368	45	TTATTATGGTTGTTATCCAC	TCGTGGTAAAATGCTGAATG	TTATTATGGTTGTTATCCAC	TCGTGGTAAAATGCTGAATG	A
1133-4_A8	WT	MMS	XIV	612687	602377	SNP	1	T	2	T/G	54.2/45.8	45/38	83	T	54.217	45	G	45.783	38	GCACCTTCCTATCCTCATCA	TAGTTCAATAGATGCGTCTA	GCACCTTCCTATCCTCATCA	TAGTTCAATAGATGCGTCTA	G	153563
1133-4_A8	WT	MMS	XV	67158	67104	SNP	1	A	2	A/G	50.5/49.5	47/46	93	A	50.538	47	G	49.462	46	GTGCATTGCAACTAATTCCA	AATTAGAAAAATAAAGCTGT	GTGCAGTACAATTAATTCCA	AATTAGAAAAATAAAGGTGT	G
1133-4_A8	WT	MMS	XV	718996	710480	SNP	1	T	2	A/T	50.0/50.0	43/43	86	A	50	43	T	50	43	TTTCAGTGTTCTTCTGTTGG	TCTTCTTCTTGTATTTCTTA	TTTCAGTGTTCTTCTGTTGG	TCTTCTTCTTGTATTTCTTA	A	651838
1133-4_A8	WT	MMS	XVI	7847	1522	SNP	1	T	2	T/A	52.2/47.8	2018-12-11	23	T	52.174	12	A	47.826	11	TACATTTACATATGAGAAAT	GTATTTATATCAATAGAATA	TACATTTACATATGAGAAAT	GTATTTATATCAATAGAATA	A
1133-4_A8	WT	MMS	XVI	203063	189819	SNP	1	T	2	T/C	50.7/49.3	37/36	73	T	50.685	37	C	49.315	36	TATAAAGGGCATTACCCTCA	CATCTTGCGGAAATAGGACG	TATAAAGGGCATTACCCTCA	CATCTTGCGGAAATAGGACG	C	195216
1133-4_A8	WT	MMS	XVI	284275	271031	SNP	1	T	2	C/T	53.1/46.9	52/46	98	C	53.061	52	T	46.939	46	AGGATGAGGTTATGCATGTA	CTAGGGCAAGGTATGGTGTG	AGGATGAGGTTATGCATGTA	CTAGGGCAAGGTATGGTGTG	C	81212
1133-4_A8	WT	MMS	XVI	683723	666935	SNP	1	G	2	G/A	50.7/49.3	38/37	75	G	50.667	38	A	49.333	37	TGCCCTCTGTTTAAAGGCAT	ATGTCTTCCACCATCCCAAT	TGCCCTCTGTTTAAAGGCAT	ATGTCTTCCACCATCCCAAT	A	399448
1133-4_A9	WT	MMS	I	230126	210377	SNP	1	T	2	G/T	50.0/50.0	2018-05-05	10	G	50	5	T	50	5	GTGTTAGTATTAGGGTGTGG	GTGTGGGTGTGGTGTGGGTG	GGGCT-GTGTTAGGGTGTGG	GTGTGGGTGTGGTGTGGGTG	G
1133-4_A9	WT	MMS	II	543351	533285	SNP	1	T	2	A/T	50.7/49.3	37/36	73	A	50.685	37	T	49.315	36	ACGTCGGCAAATTGCAAACA	TGATCTACATCCACTATGTG	ACGTCGGCAAATTGCAAACA	TGATCTACATCCACTATGTG	A
1133-4_A9	WT	MMS	II	632071	622009	SNP	1	T	2	C/T	51.9/48.1	40/37	77	C	51.948	40	T	48.052	37	TTATTTATATTTATTTTTCG	TTCCTATTTTTTTGCATACA	TTATTTATATTTATTTTTCG	TTCCTATTTTTTTGCATACA	C	88720
1133-4_A9	WT	MMS	III	203653	197323	SNP	1	G	2	T/G	52.8/47.2	38/34	72	T	52.778	38	G	47.222	34	CGGTAAAAGTGCTCCCAATA	GCGGTTTCTCGAAGTCTTGT	CGGTAAAAGTGCTCCCAATA	GCGGTTTCTCGAAGTCTTGT	T
1133-4_A9	WT	MMS	III	294662	288329	SNP	1	C	2	C/G	52.9/47.1	45/40	85	C	52.941	45	G	47.059	40	TTGTTTATATAATGTAGTGA	ATTTTCTCTTAATCTTATAC	TTGTTTATATAATGTAGTGA	ATTTTCTCTTAATCTTATAC	G	91009
1133-4_A9	WT	MMS	IV	602021	586697	SNP	1	C	2	C/T	50.6/49.4	42/41	83	C	50.602	42	T	49.398	41	CGTTGCGTGTAAAACATCCT	TCATTCAAGACAGGGTTTTC	CGTTGCGTGTAAAACATCCT	TCATTCAAGACAGGGTTTTC	T
1133-4_A9	WT	MMS	IV	628310	612986	SNP	1	C	2	C/A	55.0/45.0	44/36	80	C	55	44	A	45	36	TGGGCTTCTAAATTAGTTGG	AAATTGATAATTTGAATAGC	TGGGCTTCTAAATTAGTTGG	AAATTGATAATTTGAATAGC	A	26289
1133-4_A9	WT	MMS	IV	668937	647833	SNP	1	T	2	C/T	55.0/45.0	22/18	40	C	55	22	T	45	18	TGCATTGCGAAGTAAAACAC	TCTCAAAAAATTAAAAAAAA	TGCATTGCGAAGTAAAACAC	TCTCAAAAAATTAAAAAAAA	C	40627
1133-4_A9	WT	MMS	V	262073	262065	SNP	1	A	2	T/A	53.2/46.8	41/36	77	T	53.247	41	A	46.753	36	CATGCTGCCGCCGCGAAGGG	TCGTTAAAGCCATCCATTAC	CATGCTGCCGCCGCGAAGGG	TCGTTAAAGCCATCCATTAC	T
1133-4_A9	WT	MMS	V	427043	426989	SNP	1	T	2	T/C	53.3/46.7	40/35	75	T	53.333	40	C	46.667	35	TCACAGGAGCTAATAGCCAT	TGCCATTAATTTGTGCGGTG	TCACAGGAGCTAATAGCCAT	TGCCATTAATTTGTGCGGTG	C	164970
1133-4_A9	WT	MMS	VI	94249	93878	SNP	1	G	2	G/A	53.6/46.4	37/32	69	G	53.623	37	A	46.377	32	TTCCAGAAACCTGTCTCGAC	TATTGGTTCGAGGGCATCTC	TTCCAGAAACCTGTCTCGAC	TATTGGTTCGAGGGCATCTC	A
1133-4_A9	WT	MMS	VI	100667	100298	SNP	1	G	2	A/G	53.7/46.3	44/38	82	A	53.659	44	G	46.341	38	GTGTGAGAATATGGCGTAAC	TTTGAGAGATAGTCTCAGGT	GTGTGAGAATATGGCGTAAC	TTTGAGAGATAGTCTCAGGT	A	6418
1133-4_A9	WT	MMS	VI	103069	102700	SNP	1	G	2	A/G	52.8/47.2	47/42	89	A	52.809	47	G	47.191	42	GTGACTTGTTAATGGTCAAT	TCCTGACTGTGGACGAAAAG	GTGACTTGTTAATGGTCAAT	TCCTGACTGTGGACGAAAAG	A	2402
1133-4_A9	WT	MMS	VI	120793	120424	SNP	1	T	2	T/A	51.5/48.5	34/32	66	T	51.515	34	A	48.485	32	CAATTAAACGATTTAAGAGT	TCTTTGAATGAGAAAAACGC	CAATTAAACGATTTAAGAGT	TCTTTGAATGAGAAAAACGC	A	17724
1133-4_A9	WT	MMS	VI	129163	128794	SNP	1	T	2	T/A	53.6/46.4	37/32	69	T	53.623	37	A	46.377	32	GAAATGGCGAGAGGGCCTAA	AAAGTTTTGTTAGTTCCATA	GAAATGGCGAGAGGGCCTAA	AAAGTTTTGTTAGTTCCATA	A	8370
1133-4_A9	WT	MMS	VII	33914	27405	SNP	1	C	2	C/A	51.9/48.1	42/39	81	C	51.852	42	A	48.148	39	ATGATGAACTCTTTGATGCT	AATTTAATAAACTAGAATTT	ATGATGAACTCTTTGATGCT	AATTTAATAAACTAGAATTT	A
1133-4_A9	WT	MMS	VII	37673	31164	SNP	1	C	2	C/T	51.3/48.8	41/39	80	C	51.25	41	T	48.75	39	CGATAATATATGTTCTCCAT	AATCAAACCTGAATATTCCT	CGATAATATATGTTCTCCAT	AATCAAACCTGAATATTCCT	T	3759
1133-4_A9	WT	MMS	VII	291102	284595	SNP	1	G	2	A/G	51.7/48.3	30/28	58	A	51.724	30	G	48.276	28	CGCATACTGCTGCTGTAAAA	CACTAAGCTGGTGTCCATAT	CGCATAGTGCTGCTGTAAAA	CACTAAGCTGGTGTCCATAT	A	253429
1133-4_A9	WT	MMS	VII	698409	682624	SNP	1	A	2	T/A	50.8/49.2	32/31	63	T	50.794	32	A	49.206	31	TACCTTGGCTGGAAAATTCA	TTTTCTACCTTTTTTTTTAT	TACCTTGGCTGGAAAATTCA	TTTTCTACCTTTTTTTTTAT	T	407307
1133-4_A9	WT	MMS	VIII	489806	481731	SNP	1	C	2	T/C	52.1/47.9	38/35	73	T	52.055	38	C	47.945	35	ACAATCTCGACATCGATCAC	TGAACGCCGGTATCGAAGGA	ACAATCTCGACATCGATCAC	TGAACGCCGGTATCGAAGGA	T
1133-4_A9	WT	MMS	VIII	502647	494572	SNP	1	C	2	A/C	52.8/47.2	38/34	72	A	52.778	38	C	47.222	34	AGAAAAAATTTTACGACAGT	CAGAGACGTAATAGTCATCG	AGAAAAAATTTTACGACAGT	CAGAGACGTAATAGTCATCG	A	12841
1133-4_A9	WT	MMS	VIII	505378	497303	SNP	1	C	2	C/G	50.0/50.0	33/33	66	C	50	33	G	50	33	TTCCAGATAGATAAACACAA	TCTTATATTCTTTCTTTAGT	TTCCAGATAGATAAACACAA	TCTTATATTCTTTCTTTAGT	G	2731
1133-4_A9	WT	MMS	VIII	506627	498552	SNP	1	C	2	C/T	52.5/47.5	42/38	80	C	52.5	42	T	47.5	38	ACTATTGCTATACTGGAAGA	CGGCCGCAGTTTTTGAAAGC	ACTATTGCTATACTGGAAGA	CGGCCGCAGTTTTTGAAAGC	T	1249
1133-4_A9	WT	MMS	VIII	506706	498631	SNP	1	C	2	C/A	54.8/45.2	51/42	93	C	54.839	51	A	45.161	42	TCGATATTGATTCCACAATA	AAGTTTTTGAAATTACTATA	TCGATATTGATTCCACAATA	AAGTTTTTGAAATTACTATA	A	79
1133-4_A9	WT	MMS	VIII	507496	499421	SNP	1	T	2	T/A	53.9/46.1	41/35	76	T	53.947	41	A	46.053	35	ATTAGAGCGATCGGGAGCTG	TGCTTTGGATAATATCCTCC	ATTAGAGCGATCGGGAGCTG	TGCTTTGGATAATATCCTCC	A	790
1133-4_A9	WT	MMS	VIII	509967	501892	SNP	1	C	2	T/C	50.6/49.4	43/42	85	T	50.588	43	C	49.412	42	AGTCACTAGATCAAAGGATT	ACAGCCTTATGTTGTTTGTA	AGTCACTAGATCAAAGGATT	ACAGCCTTATGTTGTTTGTA	T	2471
1133-4_A9	WT	MMS	XI	665568	665321	SNP	1	C	2	C/A	53.5/46.5	38/33	71	C	53.521	38	A	46.479	33	TATAGTTTCTATGTACAAAA	GGTAACTATGTAATTCTTAC	TATAGTTTCTATGTACAAAA	GGTAACTATGTAATTCTTAC	A
1133-4_A9	WT	MMS	XII	1035009	979876	SNP	1	T	2	T/A	52.9/47.1	46/41	87	T	52.874	46	A	47.126	41	GTCTAGCAGGCGATTTGCTT	TTATGAGATTTCGGACAACT	GTCTAGCAGGCGATTTGCTT	TTATGAGATTTCGGACAACT	A
1133-4_A9	WT	MMS	XIII	409668	390223	SNP	1	A	2	A/T	53.7/46.3	36/31	67	A	53.731	36	T	46.269	31	GGCCGCAAATATGAACTCAA	TGCTGCAGCGGCTGCTTATT	GGCCGCAAATATGAACTCAA	TGCTGCAGCGGCTGCTTATT	T
1133-4_A9	WT	MMS	XIV	190075	180521	SNP	1	A	2	A/G	53.7/46.3	44/38	82	A	53.659	44	G	46.341	38	CCTCAAGAACAGTCTGATCA	ATTTTGACCCTGGTGAAGAG	CCTCAAGAACAGTCTGATCA	ATTTTGACCCTGGTGAAGAG	G
1133-4_A9	WT	MMS	XIV	205846	196294	SNP	1	T	2	C/T	54.3/45.7	44/37	81	C	54.321	44	T	45.679	37	CGGGTTCATTTATGTACTGG	TTTGGTTATACCATGGATTC	CGGGTTCATTTATGTACTGG	TTTGGTTATACCATGGATTC	C	15771
1133-4_A9	WT	MMS	XV	573648	570243	SNP	1	A	2	A/T	53.1/46.9	34/30	64	A	53.125	34	T	46.875	30	TCATACGAAGAATTCCACCA	TTGTTCAAATATCTGAATGT	TCATACGAAGAATTCCACCA	TTGTTCAAATATCTGAATGT	T
1133-4_A9	WT	MMS	XV	606846	599331	SNP	1	G	2	G/A	52.6/47.4	40/36	76	G	52.632	40	A	47.368	36	TCCAATATTGAGACTATTTT	CTGAGAAAAAATAATGAGCG	TCCAATATTGAGACTATTTT	CTGAGAAAAAATAATGAGCG	A	33198
1133-4_A9	WT	MMS	XV	621915	614400	SNP	1	T	2	T/A	54.7/45.3	41/34	75	T	54.667	41	A	45.333	34	CCTAAGAAGAAGATCCTACG	TGGTCTAAATGGATTTGGTA	CCTAAGAAGAAGATCCTACG	TGGTCTAAATGGATTTGGTA	A	15069
1133-4_A9	WT	MMS	XVI	606681	589766	SNP	1	G	2	T/G	52.1/47.9	50/46	96	T	52.083	50	G	47.917	46	TTATTCGAGGATCATACGAT	GAAAAGTAGGACTTGCTTGC	TTATTCGAGGATCATACGAT	GAAAAGTAGGACTTGCTTGC	T
1133-4_A9	WT	MMS	XI	286449	286455	DIP	1	A	2	A/-	54.8/42.9	23/18	42	A	54.762	23	-	42.857	18	AAGTTAAAAAAATGGAAATT	AAAAAAAAAAAAAATCAAAA	AAGTTAAAAAAATGGAAATT	AAAAAAAAAAAAAATCAAAA	-
1133-4_B1	WT	MMS	II	386458	376909	SNP	1	A	2	A/T	52.3/47.7	34/31	65	A	52.308	34	T	47.692	31	TGAATTCAATGACTTATTAG	AACAGCATGGGGGGACTTAC	TGAATTCAATGACTTATTAG	AACAGCATGGGGGGACTTAC	T
1133-4_B1	WT	MMS	II	438974	429423	SNP	1	T	2	T/G	54.1/45.9	33/28	61	T	54.098	33	G	45.902	28	TGATTCGGAAGAATTAGTAG	GATCAGTGTTTTACAAAGCT	TGATTCGGAAGAATTAGTAG	GATCAGTGTTTTACAAAGCT	G	52516
1133-4_B1	WT	MMS	II	570585	560302	SNP	1	T	2	A/T	52.5/47.5	32/29	61	A	52.459	32	T	47.541	29	ACCCAGAGTCCAAGGATAAA	CTTTATCTTTGCCCACGCAG	ACCCAGAGTCCAAGGATAAA	CTTTATCTTTGCCCACGCAG	A	131611
1133-4_B1	WT	MMS	II	631923	621644	SNP	1	A	2	A/G	50.7/49.3	37/36	73	A	50.685	37	G	49.315	36	TGTTGGCGAAAATAACTACT	TGCTGAAAGCATCATATAAC	TGTTGGCGAAAATAACTACT	TGCTGAAAGCATCATATAAC	G	61338
1133-4_B1	WT	MMS	II	638970	628691	SNP	1	C	2	C/T	51.7/48.3	30/28	58	C	51.724	30	T	48.276	28	TGCACCGGGCAAAGTAATTT	GATGGCGGTAGGCTCATATT	TGCACCGGGCAAAGTAATTT	GATGGCGGTAGGCTCATATT	T	7047
1133-4_B1	WT	MMS	III	228015	221589	SNP	1	C	2	A/C	54.1/45.9	33/28	61	A	54.098	33	C	45.902	28	GCTATCTCTTGGGCTCTGCC	GCGCTGGTTCAAATCCTGCT	GCTATCTCTTGGGCTCTGCC	GCGCTGGTTCAAATCCTGCT	A
1133-4_B1	WT	MMS	IV	219132	212481	SNP	1	C	2	C/G	50.7/49.3	35/34	69	C	50.725	35	G	49.275	34	AAATTCCAATGGCAAGACGT	TGAACTTAGACCCAAAGACT	AAATTCCAATGGCAAGACGT	TGAACTTAGACCCAAAGACT	G
1133-4_B1	WT	MMS	IV	668018	647543	SNP	1	G	2	A/G	50.0/50.0	29/29	58	A	50	29	G	50	29	AAATAAAAATGGTCTCTAGC	GGATCGAACCGCTGATCCCC	AAATAAAAATGGTCTCTAGC	GGATCGAACCGCTGATCCCC	A	448886
1133-4_B1	WT	MMS	IV	730667	710191	SNP	1	A	2	A/G	52.9/47.1	37/33	70	A	52.857	37	G	47.143	33	GTTTCGTTTGACTCCATTCG	CATGAACCACTTCCATCTTC	GTTTCGTTTGACTCCATTCG	CATGAACCACTTCCATCTTC	G	62649
1133-4_B1	WT	MMS	V	487353	482396	SNP	1	C	2	G/C	52.6/47.4	40/36	76	G	52.632	40	C	47.368	36	CCGATACGGGGAGTCGAACC	CGGTCTCCACGGTGAAAGCG	CCGATACGGGGAGTCGAACC	CGGTCTCCACGGTGAAAGCG	G
1133-4_B1	WT	MMS	VI	106179	105780	SNP	1	C	2	C/A	52.2/47.8	35/32	67	C	52.239	35	A	47.761	32	ATTGATATGGCGAGAATGTC	CACATGGTGTCTAAAGACAC	ATTGATATGGCGAGAATGTC	CACATGGTGTCTAAAGACAC	A
1133-4_B1	WT	MMS	VI	125690	125291	SNP	1	G	2	G/A	51.4/48.6	38/36	74	G	51.351	38	A	48.649	36	AGACCTTCCGAGTTGATGAT	AACTGTTAAATAACGCTTTC	AGACCTTCCGAGTTGATGAT	AACTGTTAAATAACGCTTTC	A	19511
1133-4_B1	WT	MMS	VI	218462	213122	SNP	1	C	2	A/C	53.7/46.3	36/31	67	A	53.731	36	C	46.269	31	AACATTGAATAGCCTACCTC	GGCACAAGTTTGCAAAGCAG	AACATTGAATAGCCTACCTC	GGCACAAGTTTGCAAAGCAG	A	92772
1133-4_B1	WT	MMS	VII	33731	27240	SNP	1	T	2	C/T	51.3/48.7	40/38	78	C	51.282	40	T	48.718	38	CAGAATGGAAGCCCCAAATT	TTGAGCAAACCTACAATAGA	CAGAATGGAAGCCCCAAATT	TTGAGCAAACCTACAATAGA	C
1133-4_B1	WT	MMS	VII	315947	309448	SNP	1	C	2	C/A	51.3/48.7	40/38	78	C	51.282	40	A	48.718	38	ATTGAAGCGATTTATGGTAT	CATATTCAAACCAAATCAAG	ATTGAAGCGATTTATGGTAT	CATATTCAAACCAAATCAAG	A	282216
1133-4_B1	WT	MMS	VII	534847	528361	SNP	1	G	2	G/A	52.1/47.9	38/35	73	G	52.055	38	A	47.945	35	TACGATTTCAATATTCAACT	AGCAATCTTAATAGTATTAA	TACGATTTCAATATTCAACT	AGCAATCTTAATAGTATTAA	A	218900
1133-4_B1	WT	MMS	VII	803612	786655	SNP	1	C	2	T/C	51.7/48.3	31/29	60	T	51.667	31	C	48.333	29	TTTATCAATTTAAATTACCT	TTTATTACCGTTTTTGTAAC	TTTATCAATTTAAATTACCT	TTTATTACCGTTTTTGTAAC	T	268765
1133-4_B1	WT	MMS	VII	848536	821817	SNP	1	C	2	C/A	50.0/40.0	2018-05-04	10	C	50	5	A	40	4	ATATATATATATATAATTTT	AATGAAAAAAAAAAAAAAAA	ATATATATATATATAATTTT	AATGAAAAAAAAAAAAAAAA	A	44924
1133-4_B1	WT	MMS	VII	920928	894209	SNP	1	A	2	T/A	52.4/47.6	22/20	42	T	52.381	22	A	47.619	20	GCTAATGAAAAAAAAAAACA	ACCTTTGGTATTAAACCTCT	GCTAATGAAAAAAAAAAACA	ACCTTTGGTATTAAACCTCT	T	72392
1133-4_B1	WT	MMS	VIII	237916	229834	SNP	1	C	2	T/C	52.5/47.5	21/19	40	T	52.5	21	C	47.5	19	GTTTTTTCTTCAGTCTGGCG	TCTCCCAACTGAGCTAAATC	GTTTTTTCTTCAGTCTGGCG	TCTCCCAACTGAGCTAAATC	T
1133-4_B1	WT	MMS	VIII	402523	394442	SNP	1	G	2	T/G	52.2/47.8	35/32	67	T	52.239	35	G	47.761	32	ATTTATCAGTAATTGCAGCT	TGTAACAATAAAATTGACGC	ATTTATCAGTAATTGCAGCT	TGTAACAATAAAATTGACGC	T	164607
1133-4_B1	WT	MMS	X	38712	24708	SNP	1	C	2	C/T	52.4/47.6	43/39	82	C	52.439	43	T	47.561	39	ACTCTTTCTAATAAGGCCCT	GGCTTAAGTAATGAAGCCCC	ACTCTTTCTAATAAGGCCCT	GGCTTAAGTAATGAAGCCCC	T
1133-4_B1	WT	MMS	X	60163	46159	SNP	1	C	2	C/T	54.1/45.9	33/28	61	C	54.098	33	T	45.902	28	CACTCATTATCCTCACCCCA	ATGCTGACACCTTATACATT	CACTCATTATCCTCACCCCA	ATGCTGACACCTTATACATT	T	21451
1133-4_B1	WT	MMS	X	247588	233583	SNP	1	C	2	A/C	52.4/47.6	33/30	63	A	52.381	33	C	47.619	30	CTTATAAAAATGACAATGGA	CTAGTAGCCTCTCTGATTCG	CTTATAAAAATGACAATGGA	CTAGTAGCCTCTCTGATTCG	A	187425
1133-4_B1	WT	MMS	XI	20646	20647	SNP	1	C	2	A/C	53.5/46.5	46/40	86	A	53.488	46	C	46.512	40	ACAGGGCATCAGAGTATATA	CCTTTTTCCTAAAATGGAAG	ACAGGGCATCAGAGTATATA	CCTTTTTCCTAAAATGGAAG	A
1133-4_B1	WT	MMS	XI	361314	361322	SNP	1	T	2	T/A	54.9/45.1	28/23	51	T	54.902	28	A	45.098	23	GGTAATCGATATCACCGCCG	CCTCCAAGATGGCTGGTCTT	GGTAATCGATATCACCGCCG	CCTCCAAGATGGCTGGTCTT	A	340668
1133-4_B1	WT	MMS	XI	522374	522162	SNP	1	C	2	T/C	50.9/49.1	27/26	53	T	50.943	27	C	49.057	26	TTTGAGATTGTTTTCACTTT	AGAATTTCTCACGACCCCAC	TTTGAGATTGTTTTCACTTT	AGAATTTCTCACGACCCCAC	T	161060
1133-4_B1	WT	MMS	XII	261020	249583	SNP	1	T	2	T/A	54.9/45.1	28/23	51	T	54.902	28	A	45.098	23	AAGCAGCAATTATTTGATCT	CTAGGCAAAAACTACACTTC	AAGCAGCAATTATTTGATCT	CTAGGCAAAAACTACACTTC	A
1133-4_B1	WT	MMS	XIV	46636	40988	SNP	1	T	2	T/A	54.7/45.3	35/29	64	T	54.688	35	A	45.312	29	TTGTAAAAGTCCTCTTTCAA	AGTTTTAGCCTTTGTTGTCT	TTGTAAAAGTCCTCTTTCAA	AGTTTTAGCCTTTGTTGTCT	A
1133-4_B1	WT	MMS	XIV	48252	42604	SNP	1	A	2	A/T	52.1/47.9	37/34	71	A	52.113	37	T	47.887	34	ATGTGGCAAAATCGATAGCG	CTATCTAGAACAGGCTAGTT	ATGTGGCAAAATCGATAGCG	CTATCTAGAACAGGCTAGTT	T	1616
1133-4_B1	WT	MMS	XV	32057	32057	SNP	1	C	2	C/G	53.4/46.6	39/34	73	C	53.425	39	G	46.575	34	AGCCACAACACAGGGCCTAG	ACCAAGCATTTTCACCCAAT	AGCCACAACACAGGGCCTAG	ACCAAGCATTTTCACCCAAT	G
1133-4_B1	WT	MMS	XV	341069	337652	SNP	1	A	2	A/T	51.8/48.2	29/27	56	A	51.786	29	T	48.214	27	AGTAGAAAAAAAAATAACTA	TCTAATTTTGTTGTTCCTAT	AGTAGAAAAAAAAATAACTA	TCTAATTTTGTTGTTCCTAT	T	309012
1133-4_B1	WT	MMS	XVI	683880	666507	SNP	1	A	2	T/A	52.8/47.2	38/34	72	T	52.778	38	A	47.222	34	TTATACTGTTTTGTTTCAGA	TTTAAAATATAAGTATCTGT	TTATACTGTTTTGTTTCAGA	TTTAAAATATAAGTATCTGT	T
1133-4_B1	WT	MMS	II	767510	756850	DIP	1	-	2	T/-	50.0/50.0	29/29	58	T	50	29	-	50	29	GCTACCAGCAAACAACAATC	TTTTTTTTGGAAATGCAACA	GCTACCAGCAAACAACAATC	TTTTTTTTGGAAATGCAACA	T
1133-4_B10	WT	MMS	I	150581	149576	SNP	1	G	2	C/G	53.9/46.1	41/35	76	C	53.947	41	G	46.053	35	GAATTTTTTTAGCTTCAATT	CTTCACGACGTGTCCCTTAT	GAATTTTTTTAGCTTCAATT	CTTCACGACGTGTCCCTTAT	C
1133-4_B10	WT	MMS	II	203082	200952	SNP	1	C	2	T/C	54.5/45.5	36/30	66	T	54.545	36	C	45.455	30	GTCTAGATAATGGCAGTAAA	CGGGCATGTTCAAATATGAT	GTCTAGATAATGGCAGTAAA	CGGGCATGTTCAAATATGAT	T
1133-4_B10	WT	MMS	II	721841	712083	SNP	1	T	2	G/T	53.0/47.0	35/31	66	G	53.03	35	T	46.97	31	GACTATGAAGCCGCTGGTGA	GAAAAGAGTGTCAAATCAGA	GACTATGAAGCCGCTGGTGA	GAAAAGAGTGTCAAATCAGA	G	518759
1133-4_B10	WT	MMS	III	202063	195830	SNP	1	T	2	T/A	51.6/48.4	32/30	62	T	51.613	32	A	48.387	30	CACCTTCTAAAAGCATGATT	TCAAAACCATTAAAAACTCA	CACCTTCTAAAAGCATGATT	TCAAAACCATTAAAAACTCA	A
1133-4_B10	WT	MMS	III	290169	283936	SNP	1	C	2	T/C	54.7/45.3	47/39	86	T	54.651	47	C	45.349	39	CTGATATCAGAGCTCACTTG	TCAATAATACATGTTACAAA	CTGATATCAGAGCTCACTTG	TCAATAATACATGTTACAAA	T	88106
1133-4_B10	WT	MMS	III	295575	289339	SNP	1	G	2	G/T	54.7/45.3	41/34	75	G	54.667	41	T	45.333	34	CATTTTTTATCACGTTATTC	GTGACACCCAGGTTGCCGCC	CATTTTTTATCACGTTATTC	GTGACACCCAGGTTGCCGCC	T	5406
1133-4_B10	WT	MMS	IV	202807	196377	SNP	1	C	2	C/T	50.0/50.0	36/36	72	C	50	36	T	50	36	TGTAAGAGATCCCAGAGCTA	GGACTTGGCTTTTTCTTCCT	TGTAAGAGATCCCAGAGCTA	GGACTTGGCTTTTTCTTCCT	T
1133-4_B10	WT	MMS	IV	289203	282772	SNP	1	A	2	A/T	50.8/49.2	33/32	65	A	50.769	33	T	49.231	32	TACGGTACACCATGGACTCA	GAATTGTGTCAAAAATCGCA	TACGGTACACCATGGACTCA	GAATTGTGTCAAAAATCGCA	T	86396
1133-4_B10	WT	MMS	IV	696312	675639	SNP	1	G	2	A/G	50.0/50.0	32/32	64	A	50	32	G	50	32	ACCGGAAAGTGTGAAGCAAA	GGACGTAGAGGTCAATACAA	ACCGGAAAGTGTGAAGCAAA	GGACGTAGAGGTCAATACAA	A	407109
1133-4_B10	WT	MMS	IV	927334	904979	SNP	1	C	2	T/C	54.0/46.0	34/29	63	T	53.968	34	C	46.032	29	CGTTTCTTTTTTTTTTATCC	ACTCTTTTCTTTTTTCTTTC	CGTTTCTTTTTTTTTTATCC	ACTCTTTTCTTTTTTCTTTC	T	231022
1133-4_B10	WT	MMS	IV	994932	968596	SNP	1	T	2	A/T	53.6/46.4	30/26	56	A	53.571	30	T	46.429	26	GGGAAATTTTCAGGTAAAGC	GAAAAATCGTCTTTTGAGAT	GGGAAATTTTCAGGTAAAGC	GAAAAATCGTCTTTTGAGAT	A	67598
1133-4_B10	WT	MMS	IV	1077937	1051601	SNP	1	A	2	T/A	53.2/46.8	42/37	79	T	53.165	42	A	46.835	37	ATAGAGTAGCACAATTATTT	TAAGAATAACATACATACGC	ATAGAGTAGCACAATTATTT	TAAGAATAACATACATACGC	T	83005
1133-4_B10	WT	MMS	IV	1410105	1371600	SNP	1	G	2	A/G	53.1/46.9	34/30	64	A	53.125	34	G	46.875	30	GTACCACCATTTCCCCCTAT	TTTTAGTATCTTCTGTTCCT	GTACCACCATTTCCCCCTAT	TTTTAGTATCTTCTGTTCCT	A	332168
1133-4_B10	WT	MMS	IV	1482054	1443549	SNP	1	T	2	T/C	50.7/49.3	37/36	73	T	50.685	37	C	49.315	36	TCGCCGTAACTAATGGAATA	TCTAAATAGCAGGCAGTTAG	TCGCCGTAACTAATGGAATA	TCTAAATAGCAGGCAGTTAG	C	71949
1133-4_B10	WT	MMS	V	61798	61797	SNP	1	A	2	A/T	54.4/45.6	31/26	57	A	54.386	31	T	45.614	26	CGCTTTCTGAAATCTAAACT	GAAAAGAAAAGGAACTATCA	CGCTTTCTGAAATCTAAACT	GAAAAGAAAAGGAACTATCA	T
1133-4_B10	WT	MMS	V	208759	208750	SNP	1	A	2	T/A	54.1/45.9	33/28	61	T	54.098	33	A	45.902	28	AGTGGGGATTGATGTTAGGG	TATCTTCTATAATGCTACTA	AGTGGGGATTGATGTTAGGG	TATCTTCTATAATGCTACTA	T	146961
1133-4_B10	WT	MMS	VI	132096	131735	SNP	1	A	2	A/T	53.0/47.0	35/31	66	A	53.03	35	T	46.97	31	AGCAGCCATAAAGGCCTTGG	CGCTGATGCATTCCAACGTG	AGCAGCCATAAAGGCCTTGG	CGCTGATGCATTCCAACGTG	T
1133-4_B10	WT	MMS	VIII	303746	295609	SNP	1	T	2	T/A	53.9/46.1	41/35	76	T	53.947	41	A	46.053	35	GAATTTTGTTCCTGATTTAA	CATAAGGCTTTTACAAGACT	GAATTTTGTTCCTGATTTAA	CATAAGGCTTTTACAAGACT	A
1133-4_B10	WT	MMS	IX	388616	372275	SNP	1	A	2	A/G	51.4/48.6	38/36	74	A	51.351	38	G	48.649	36	AGAAGCCTTGGTCAATCAGA	CAGGCAACGTTGTTTTTTCT	AGAAGCCTTGGTCAATCAGA	CAGGCAACGTTGTTTTTTCT	G
1133-4_B10	WT	MMS	X	90896	77078	SNP	1	T	2	T/C	52.1/47.9	38/35	73	T	52.055	38	C	47.945	35	GAAACTGCTCAAGCCATTAA	GGTTGGGAATTGACTAAGGC	GAAACTGCTCAAGCCATTAA	GGTTGGGAATTGACTAAGGC	C
1133-4_B10	WT	MMS	XI	308217	308223	SNP	1	C	2	T/C	52.6/47.4	40/36	76	T	52.632	40	C	47.368	36	AACCGACTAGACCACGAAAC	ACTTAATTGTTGAATAACGG	AACCGACTAGACCACGAAAC	ACTTAATTGTTGAATAACGG	T
1133-4_B10	WT	MMS	XIII	808326	790165	SNP	1	C	2	C/G	51.9/48.1	28/26	54	C	51.852	28	G	48.148	26	CACTATAGGACCTTTTTCTT	TGTTGTTAGTGTACACTAAA	CACTATAGGACCTTTTTCTT	TGTTGTTAGTGTACACTAAA	G
1133-4_B10	WT	MMS	XIII	809345	791184	SNP	1	C	2	T/C	51.4/48.6	38/36	74	T	51.351	38	C	48.649	36	TATTTTTTTGCCAACCTGAT	TGTGAAAGAAAAATGTACCT	TATTTTTTTGCCAACCTGAT	TGTGAAAGAAAAATGTACCT	T	1019
1133-4_B10	WT	MMS	XIII	840378	822217	SNP	1	T	2	T/A	51.3/48.7	39/37	76	T	51.316	39	A	48.684	37	AATAAACCACGCCAAGTGTT	GCCCAATTTGAAATTTCAGG	AATAAACCACGCCAAGTGTT	GCCCAATTTGAAATTTCAGG	A	31033
1133-4_B10	WT	MMS	XIV	536558	526868	SNP	1	T	2	A/T	52.1/47.9	38/35	73	A	52.055	38	T	47.945	35	TGCCAGAAACATGTCCACTG	TATTTGTAGTTTATTACACT	TGCCAGAAACATGTCCACTG	TATTTGTAGTTTATTACACT	A
1133-4_B10	WT	MMS	XIV	631846	621367	SNP	1	G	2	A/G	51.5/48.5	34/32	66	A	51.515	34	G	48.485	32	TTGATAAAAATAAATCAATG	GGGCGAGCCGGGACTCGAAC	TTGATAAAAATAAATCAATG	GGGCGAGCCGGGACTCGAAC	A	95288
1133-4_B10	WT	MMS	XIV	745209	734728	SNP	1	A	2	T/A	51.6/48.4	32/30	62	T	51.613	32	A	48.387	30	GCATTGTAAGAGGCAATGCG	TACCCTTTAATTTTAAAATC	GCATTGTAAGAGGCAATGCG	TACCCTTTAATTTTAAAATC	T	113363
1133-4_B10	WT	MMS	XV	379163	375765	SNP	1	C	2	T/C	53.2/46.8	33/29	62	T	53.226	33	C	46.774	29	ATTCTCGTAAACAAGACACC	ATTGGCGAATCCTCTTGGCA	ATTCTCGTAAACAAGACACC	ATTGGCGAATCCTCTTGGCA	T
1133-4_B10	WT	MMS	XV	555752	552354	SNP	1	T	2	T/C	52.8/47.2	28/25	53	T	52.83	28	C	47.17	25	CCAAGTCATATTGCTCGTTG	CTTCATCATATCGGATAGGC	CCAAGTCATATTGCTCGTTG	CTTCATCATATCGGATAGGC	C	176589
1133-4_B10	WT	MMS	XV	562736	559338	SNP	1	A	2	A/G	50.8/49.2	32/31	63	A	50.794	32	G	49.206	31	GTTTTAAATCTCCGTCACCA	TTGATCATTTGTTACAATCG	GTTTTAAATCTCCGTCACCA	TTGATCATTTGTTACAATCG	G	6984
1133-4_B10	WT	MMS	XV	880607	872447	SNP	1	C	2	T/C	54.2/45.8	45/38	83	T	54.217	45	C	45.783	38	CAAGATATCCAGAAACTGTT	TCAACTTGGTGCAGGAGAAT	CAAGATATCCAGAAACTGTT	TCAACTTGGTGCAGGAGAAT	T	317871
1133-4_B10	WT	MMS	XV	910951	902791	SNP	1	G	2	G/T	52.1/47.9	38/35	73	G	52.055	38	T	47.945	35	GCGATGGTTGGTTCAAGACC	GTGACATCGGTGAATGGGAA	GCGATGGTTGGTTCAAGACC	GTGACATCGGTGAATGGGAA	T	30344
1133-4_B10	WT	MMS	XVI	36118	28417	SNP	1	G	2	T/G	53.6/46.4	37/32	69	T	53.623	37	G	46.377	32	TATTAAATTATTTTGAATTT	AAAAGTTCATTAAAATCTTA	TATTAAATTATTTTGAATTT	AAAAGTTCATTAAAATCTTA	T
1133-4_B10	WT	MMS	XVI	253996	241873	SNP	1	A	2	A/T	52.9/47.1	37/33	70	A	52.857	37	T	47.143	33	AATCTAGCGGTTTCATTTTG	TTGATTACAATACGTGGTGA	AATCTAGCGGTTTCATTTTG	TTGATTACAATACGTGGTGA	T	217878
1133-4_B10	WT	MMS	XVI	317774	305651	SNP	1	A	2	A/T	53.9/46.1	41/35	76	A	53.947	41	T	46.053	35	TGTAGTTACCAGAATAACCA	TATATCCGTCTCCTCCTTTC	TGTAGTTACCAGAATAACCA	TATATCCGTCTCCTCCTTTC	T	63778
1133-4_B10	WT	MMS	VII	108279	101766	DIP	1	C	2	C/-	51.6/46.9	33/30	64	C	51.562	33	-	46.875	30	TAACACATTTTTAGAGTCAT	CCCGGAGAGGAGAACTCTGA	TAACACATTTTTAGAGTCAT	CCCGGAGAGGAGAACTCTGA	-
1133-4_B10	WT	MMS	XVI	108396	96278	DIP	1	T	2	T/-	53.8/45.0	43/36	80	T	53.75	43	-	45	36	CGCTTAGCAAAATCCAACCA	TTTTTTTTTTATCTCCCGCG	CGCTTAGCAAAATCCAACCA	TTTTTTTTTATCTCCCGCGT	-
1133-4_B3	WT	MMS	I	123590	122555	SNP	1	G	2	G/T	50.8/49.2	32/31	63	G	50.794	32	T	49.206	31	AAGAAGAATAGGTATATTGT	GTGATTAAGATGATTTTTAA	AAGAAGAATAGGTATATTGT	GTGATTAAGATGATTTTTAA	T
1133-4_B3	WT	MMS	II	232527	229961	SNP	1	T	2	A/T	50.8/49.2	32/31	63	A	50.794	32	T	49.206	31	AAATGATGATATTACTAATT	CCTCCCTAGTATTCTAACAA	AAATGATGATATTACTAATT	CCTCCCTAGTATTCTAACAA	A
1133-4_B3	WT	MMS	II	362578	353640	SNP	1	C	2	C/A	50.8/49.2	33/32	65	C	50.769	33	A	49.231	32	TAGCAAATAAGATCAATGAT	AATTATCAAATACAATTTCA	TAGCAAATAAGATCAATGAT	AATTATCAAATACAATTTCA	A	130051
1133-4_B3	WT	MMS	IV	580374	564912	SNP	1	C	2	G/C	51.2/48.8	44/42	86	G	51.163	44	C	48.837	42	TCTAGAATTCACAGATTGGC	AGATACTACAGAACTGTTGC	TCTAGAATTCACAGATTGGC	AGATACTACAGAACTGTTGC	G
1133-4_B3	WT	MMS	IV	664182	643141	SNP	1	C	2	A/C	53.8/46.2	35/30	65	A	53.846	35	C	46.154	30	CTCGGTATTCTATCAAAATG	GAATAATCTTTTCTGGATAT	CTCGGTATTCTATCAAAATG	GAATAATCTTTTCTGGATAT	A	83808
1133-4_B3	WT	MMS	IV	855978	834937	SNP	1	T	2	T/A	53.6/46.4	37/32	69	T	53.623	37	A	46.377	32	TAGCTCTTCCCATGGGCCTC	TAGGCGGTGACGTTTCTGGC	TAGCTCTTCCCATGGGCCTC	TAGGCGGTGACGTTTCTGGC	A	191796
1133-4_B3	WT	MMS	IV	1488346	1449400	SNP	1	T	2	T/G	50.7/49.3	34/33	67	T	50.746	34	G	49.254	33	GAGATATGTGAACCCAGAGA	CGATGAACGCCCGAACATTT	GAGATATGTGAACCCAGAGA	CGATGAACGCCCGAACATTT	G	632368
1133-4_B3	WT	MMS	VII	98757	92266	SNP	1	T	2	T/C	54.5/45.5	18/15	33	T	54.545	18	C	45.455	15	ATCACAAACCACGATACTAA	ACCCGGAAGTCGCGTGATCT	ATCACAAACCACGATACTAA	ACCCGGAAGTCGCGTGATCT	C
1133-4_B3	WT	MMS	VII	148449	141958	SNP	1	G	2	C/G	50.6/49.4	43/42	85	C	50.588	43	G	49.412	42	ACAAATCTCTGACGGCAGCG	CTTCAACAATGTTTCTGATA	ACAAATCTCTGACGGCAGCG	CTTCAACAATGTTTCTGATA	C	49692
1133-4_B3	WT	MMS	VII	700726	684477	SNP	1	G	2	G/T	51.6/48.4	33/31	64	G	51.562	33	T	48.438	31	GTCGAGGTCCTGATCTCTTC	GAGGCGCGGGTTCAAACCCC	GTCGAGGTCCTGATCTCTTC	GAGGCGCGGGTTCAAACCCC	T	552277
1133-4_B3	WT	MMS	X	110175	95941	SNP	1	G	2	G/T	50.0/50.0	29/29	58	G	50	29	T	50	29	GACATCTTCTGTACCATTTT	TAAATTACCTAGTCTTTGAC	GACATCTTCTGTACCATTTT	TAAATTACCTAGTCTTTGAC	T
1133-4_B3	WT	MMS	X	384144	369564	SNP	1	T	2	T/A	54.7/45.3	35/29	64	T	54.688	35	A	45.312	29	AGTTCCAGTAATTGAAAAGC	ATACCGCGAAAAATGGACCG	AGTTCCAGTAATTGAAAAGC	ATACCGCGAAAAATGGACCG	A	273969
1133-4_B3	WT	MMS	XIII	287874	273475	SNP	1	C	2	C/T	53.5/46.5	38/33	71	C	53.521	38	T	46.479	33	CACGCAACTGGCGTGGACGA	AACAATAAGTCGCCCATTTT	CACGCAACTGGCGTGGACGA	AACAATAAGTCGCCCATTTT	T
1133-4_B3	WT	MMS	XIV	288497	278499	SNP	1	T	2	T/C	54.2/45.8	32/27	59	T	54.237	32	C	45.763	27	GGAAGACAAAGCATTATATC	TGCTTTGAAGAGCAACCAAT	GGAAGACAAAGCATTATATC	TGCTTTGAAGAGCAACCAAT	C
1133-4_B3	WT	MMS	XV	728719	719832	SNP	1	T	2	C/T	50.0/50.0	36/36	72	C	50	36	T	50	36	TCTAGGTTACCAAGTTGGAT	TGAGTATATTAGGCAATTGG	TCTAGGTTACCAAGTTGGAT	TGAGTATATTAGGCAATTGG	C
1133-4_B3	WT	MMS	XVI	115655	102697	SNP	1	T	2	C/T	50.0/50.0	37/37	74	C	50	37	T	50	37	TAAGCCTTCCTCTTCATCTT	ATCCTCCTCTTCTTCTGCAT	TAAGCCTTCCTCTTCATCTT	ATCCTCCTCTTCTTCTGCAT	C
1133-4_B3	WT	MMS	XVI	424934	411968	SNP	1	T	2	C/T	50.8/49.2	30/29	59	C	50.847	30	T	49.153	29	TGAGGTGCCCAGTGTTGTGG	TGTGGCTCGAATAGCTGGAC	TGAGGTGCCCAGTGTTGTGG	TGTGGCTCGAATAGCTGGAC	C	309279
1133-4_B3	WT	MMS	XVI	560210	543299	SNP	1	G	2	G/A	52.7/47.3	39/35	74	G	52.703	39	A	47.297	35	AATAGAAATGCGAATTCTGT	GATCGAACACAGGACCTCCA	AATAGAAATGCGAATTCTGT	GATCGAACACAGGACCTCCA	A	135276
1133-4_B3	WT	MMS	XI	42287	42291	DIP	1	-	2	-/A	54.5/45.5	24/20	44	-	54.545	24	A	45.455	20	ATTAAATATATACATTAAAT	ATGTATATATATATGTATGA	ATTAAATATATACATTAAAT	TGTATATATATATGTATGAC	A
1133-4_B4	WT	MMS	II	647263	636261	SNP	1	A	2	A/G	53.7/46.3	51/44	95	A	53.684	51	G	46.316	44	CTTGCCATAATAGCTAATGA	ATCAATCATTATCATTTCTA	CTTGCCATAATAGCTAATGA	ATCAATCATTATCATTTCTA	G
1133-4_B4	WT	MMS	II	801741	790735	SNP	1	A	2	A/C	50.0/50.0	42/42	84	A	50	42	C	50	42	TCGTAAATAAGTATGATCAC	ATATGAAGTTGGAGGCTTGG	TCGTAAATAAGTATGATCAC	ATATGAAGTTGGAGGCTTGG	C	154478
1133-4_B4	WT	MMS	III	177639	172070	SNP	1	T	2	T/C	51.8/48.2	43/40	83	T	51.807	43	C	48.193	40	GACCACCTGGACCTGGAGTC	TGGTTCTAGTACCACCGGTA	GACCACCTGGACCTGGAGTC	TGGTTCTAGTACCACCGGTA	C
1133-4_B4	WT	MMS	IV	130423	123904	SNP	1	C	2	T/C	50.6/49.4	43/42	85	T	50.588	43	C	49.412	42	CCGCTTATTTGGATCTGGCT	TCACCTTCCGTCTCTTTCTC	CCGCTTATTTGGATCTGGCT	TCACCTTCCGTCTCTTTCTC	T
1133-4_B4	WT	MMS	IV	707185	686602	SNP	1	A	2	A/G	54.3/45.7	44/37	81	A	54.321	44	G	45.679	37	TGGCATGAGAGCAGCTGGCA	AACTACTATAAGTAAATGGT	TGGCATGAGAGCAGCTGGCA	AACTACTATAAGTAAATGGT	G	576762
1133-4_B4	WT	MMS	VII	1061035	1034310	SNP	1	T	2	A/T	51.1/48.9	47/45	92	A	51.087	47	T	48.913	45	TTCAGGAAGCATACCGAATG	TGTCTTGTTTTGAACAATTG	TTCAGGAAGCATACCGAATG	TGTCTTGTTTTGAACAATTG	A
1133-4_B4	WT	MMS	XII	413930	402819	SNP	1	C	2	C/T	52.8/47.2	47/42	89	C	52.809	47	T	47.191	42	GGTTTTGGACATAATAAAGA	GCAAAATGAAGGAAACAGTG	GGTTTTGGACATAATAAAGA	GCAAAATGAAGGAAACAGTG	T
1133-4_B4	WT	MMS	XII	959061	905918	SNP	1	C	2	T/C	52.1/47.9	38/35	73	T	52.055	38	C	47.945	35	GTGAAAAAGAACAAGTGGCC	AGAATAATCAAGCACAGAAA	GTGAAAAAGAACAAGTGGCC	AGAATAATCAAGCACAGAAA	T	545131
1133-4_B4	WT	MMS	XIII	475365	456567	SNP	1	C	2	T/C	51.4/48.6	37/35	72	T	51.389	37	C	48.611	35	GGAAATGAAACAGGCCATTA	CCCACGATTTTTCATTTTCA	GGAAATGAAACAGGCCATTA	CCCACGATTTTTCATTTTCA	T
1133-4_B4	WT	MMS	XIV	672094	661261	SNP	1	C	2	T/C	52.6/47.4	40/36	76	T	52.632	40	C	47.368	36	TTGCGCGAGAATATAGAAGT	ATATTATCAAATGGACGAAT	TTGCGCGAGAATATAGAAGT	ATATTATCAAATGGACGAAT	T
1133-4_B4	WT	MMS	XIV	672322	661489	SNP	1	C	2	T/C	51.8/48.2	44/41	85	T	51.765	44	C	48.235	41	AAAGCGCTGAAAATTTTCTA	TGGAAATTTCAGAATATGAA	AAAGCGCTGAAAATTTTCTA	TGGAAATTTCAGAATATGAA	T	228
1133-4_B4	WT	MMS	XIV	678787	667954	SNP	1	A	2	G/A	54.1/45.9	33/28	61	G	54.098	33	A	45.902	28	AATAAAGCCATTAAACAACG	TTCAGTTGACAATGCGTTGG	AATAAAGCCATTAAACAACG	TTCAGTTGACAATGCGTTGG	G	6465
1133-4_B4	WT	MMS	III	315518	309125	DIP	4	TATA	1	----	47.7	21	44	----	47.727	21				ATAACATTATATCATATTCC	TATATATATATATATATATA	ATAACATTATATCATATTCC	TATATATATATATATATATA	----
1133-4_B5	WT	MMS	II	118099	115962	SNP	1	G	2	G/A	51.3/48.7	40/38	78	G	51.282	40	A	48.718	38	TTGAGGATGAAGATATTACT	CAGGTTCTAGTGCTATCGAG	TTGAGGATGAAGATATTACT	CAGGTTCTAGTGCTATCGAG	A
1133-4_B5	WT	MMS	II	589010	579692	SNP	1	G	2	G/T	54.7/45.3	47/39	86	G	54.651	47	T	45.349	39	AAATGACCTTCGTTGCGTGA	TAAGTAAGAGTTTGTGGTAC	AAATGACCTTCGTTGCGTGA	TAAGTAAGAGTTTGTGGTAC	T	470911
1133-4_B5	WT	MMS	II	813167	801595	SNP	1	T	2	G/T	54.2/45.8	32/27	59	G	54.237	32	T	45.763	27	GTGGGTGTGGTGTGTGTGGG	GTGGTGTGTGGGTGTGT	GTGGGTGTGGTGTGTGTGGG	GTGGTGTGTGGGTGTGT	G	224157
1133-4_B5	WT	MMS	III	160836	155230	SNP	1	A	2	A/C	51.5/48.5	34/32	66	A	51.515	34	C	48.485	32	GTATGAGATAAATCTCTCAA	CCCTAGACCAAAGCCTCCGT	GTATGAGATAAATCTCTCAA	CCCTAGACCAAAGCCTCCGT	C
1133-4_B5	WT	MMS	III	316587	309930	SNP	1	T	2	G/T	50.0/50.0	2018-06-06	12	G	50	6	T	50	6	GTGGGTGTGGTGTGTGGGTG	GGGTGTGTGGGTGTGGTGGG	GTGGGTGTGGTGTGTGGGTG	GGGTGTGTGGGTGTGGTGGG	G	155751
1133-4_B5	WT	MMS	IV	32108	24982	SNP	1	T	2	A/T	51.2/48.8	43/41	84	A	51.19	43	T	48.81	41	TTTACTTAATCGTATATTAA	GACGTCCCTTATCTATTAAC	TTTACTTAATCGTATATTAA	GACGTCCCTTATCTATTAAC	A
1133-4_B5	WT	MMS	IV	32773	25647	SNP	1	G	2	G/A	52.7/47.3	49/44	93	G	52.688	49	A	47.312	44	TGAACGGCCTTGATAAGGAT	TTAGTTGTGTTATTGCTGGG	TGAACGGCCTTGATAAGGAT	TTAGTTGTGTTATTGCTGGG	A	665
1133-4_B5	WT	MMS	IV	77220	70092	SNP	1	G	2	C/G	51.4/48.6	37/35	72	C	51.389	37	G	48.611	35	GCAGTAGCATGATTCTGCAC	ATTATTTATGTTTTTCCCTT	GCAGTAGCATGATTCTGCAC	ATTATTTATGTTTTTCCCTT	C	44447
1133-4_B5	WT	MMS	IV	758838	736658	SNP	1	C	2	C/T	50.0/50.0	2018-11-11	22	C	50	11	T	50	11	CCAAGGCCACCAATCACCAT	TGCTATCGGATAGTGCATAC	CCAAGGCCACCAATCACCAT	TACTATCGGATAGTGCATAC	T	681618
1133-4_B5	WT	MMS	IV	1525405	1485219	SNP	1	G	2	G/T	52.4/42.9	2018-11-09	21	G	52.381	11	T	42.857	9	GGGTGTGTGGGTGTGGTGTG	GTGTGGGTGTGGTGTGGGTG	GGGTGTGTGGGTGTGGTGTG	GTGTGGGTGTGGTGTGGGTG	T	766567
1133-4_B5	WT	MMS	V	166811	166803	SNP	1	A	2	A/T	54.4/45.6	37/31	68	A	54.412	37	T	45.588	31	TAATTGCTTACTGAGTCAAA	GTGTACACTAACCCCTGGTA	TAATTGCTTACTGAGTCAAA	GTGTACACTAACCCCTGGTA	T
1133-4_B5	WT	MMS	VI	6466	5984	SNP	1	T	2	T/C	54.1/45.9	40/34	74	T	54.054	40	C	45.946	34	AAATGAGAAAAGTGTAGATG	ATTATCTTTCAAACAGCTCG	AAATGAGAAAAGTGTAGATG	ATTATCTTTCAAACAGCTCG	C
1133-4_B5	WT	MMS	VI	6849	6367	SNP	1	A	2	G/A	53.7/46.3	51/44	95	G	53.684	51	A	46.316	44	AAAATAAGGCTTGGAATATT	GGTACTTTTTCTTCAATGCC	AAAATAAGGCTTGGAATATT	GGTACTTTTTCTTCAATGCC	G	383
1133-4_B5	WT	MMS	VI	165473	160062	SNP	1	T	2	A/T	54.4/45.6	49/41	90	A	54.444	49	T	45.556	41	AGTGAACGATTTAAGGGATA	GATTCTTAATTATAACCCTT	AGTGAACGATTTAAGGGATA	GATTCTTAATTATAACCCTT	A	158624
1133-4_B5	WT	MMS	VII	107710	101214	SNP	1	C	2	A/C	50.0/50.0	38/38	76	A	50	38	C	50	38	CGACGAAAAATGCGAGATCT	GACCAAAAAAAGGGGGTAGG	CGACGAAAAATGCGAGATCT	GACCAAAAAAAGGGGGTAGG	A
1133-4_B5	WT	MMS	VII	1057492	1031446	SNP	1	T	2	C/T	53.0/47.0	53/47	100	C	53	53	T	47	47	TTTTTCATTCTAGAAATATA	ATTTATACATCATTTTCAGA	TTTTTCATTCTAGAAATATA	ATTTATACATCATTTTCAGA	C	949782
1133-4_B5	WT	MMS	VIII	444783	436699	SNP	1	T	2	A/T	50.0/50.0	27/27	54	A	50	27	T	50	27	GACCCAGTTGGTGGAGTTCA	TGTTCTGGACGTGGATTCTA	GACCCAGTTGGTGGAGTTCA	TGTTCTGGACGTGGATTCTA	A
1133-4_B5	WT	MMS	VIII	475647	467563	SNP	1	C	2	A/C	52.2/47.8	24/22	46	A	52.174	24	C	47.826	22	AAAAAATATTTAACAAAGTG	ATGCCTCTAAACGTCGTAAT	AAAAAATATTTAACAAAGTG	ATGCCTCTAAACGTCGTAAT	A	30864
1133-4_B5	WT	MMS	IX	53121	37088	SNP	1	G	2	G/A	50.5/49.5	46/45	91	G	50.549	46	A	49.451	45	GGAGCCTTCTCCACGGTGGC	GATTTGGACAGTAGGTATGA	GGAGCCTTCTCCACGGTGGC	GATTTGGACAGTAGGTATGA	A
1133-4_B5	WT	MMS	XI	611096	611031	SNP	1	A	2	A/T	52.6/47.4	41/37	78	A	52.564	41	T	47.436	37	CCATTTGTCTTTCCTAGCAC	CATGTTTCATAACATTCTTA	CCATTTGTCTTTCCTAGCAC	CATGTTTCATAACATTCTTA	T
1133-4_B5	WT	MMS	XI	649388	649301	SNP	1	A	2	A/T	51.1/48.9	46/44	90	A	51.111	46	T	48.889	44	GAGTCTGGTGTCTGTTCCGA	ACTGCTTCACCTGCTATCGT	GAGTCTGGTGTCTGTTCCGA	ACTGCTTCACCTGCTATCGT	T	38292
1133-4_B5	WT	MMS	XII	626152	576291	SNP	1	T	2	T/A	51.1/48.9	24/23	47	T	51.064	24	A	48.936	23	TTGTGCAAAGCTTTGTGAGC	TTGTAGTTGTTTTCATAACA	TTGTGCAAAGCTTTGTGAGC	TTGTAGTTGTTTTCATAACA	A
1133-4_B5	WT	MMS	XII	658212	604979	SNP	1	C	2	C/A	53.2/46.8	25/22	47	C	53.191	25	A	46.809	22	CTGCAGTTATCATCGTTTTG	ATGTCTGTTCTGTCGGTGAA	CTGCAGTTATCATCGTTTTG	ATGTCTGTTCTGTCGGTGAA	A	32060
1133-4_B5	WT	MMS	XII	1050082	994484	SNP	1	A	2	A/G	50.6/49.4	41/40	81	A	50.617	41	G	49.383	40	TGGAAGCGATACCAGAAGGA	CAGACAAAGCAAACACCACT	TGGAAGCGATACCAGAAGGA	CAGACAAAGCAAACACCACT	G	391870
1133-4_B5	WT	MMS	XIII	168336	163335	SNP	1	C	2	C/T	52.6/47.4	50/45	95	C	52.632	50	T	47.368	45	TATGGTTACCGGATTTATTT	GTAAATTCTTATTGAAGAAT	TATGGTTACCGGATTTATTT	GTAAATTCTTATTGAAGAAT	T
1133-4_B5	WT	MMS	XIII	364543	350062	SNP	1	C	2	C/A	51.3/48.8	41/39	80	C	51.25	41	A	48.75	39	AGCGCATTTTGTGATTGTGC	ATTGACTGGGAAGGTTGGGA	AGCGCATTTTGTGATTGTGC	ATTGACTGGGAAGGTTGGGA	A	196207
1133-4_B5	WT	MMS	XIII	863560	845022	SNP	1	C	2	C/G	51.5/48.5	50/47	97	C	51.546	50	G	48.454	47	ACCGTTTTTATTATCAGCTA	GATCGAAATATATACGTTTT	ACCGTTTTTATTATCAGCTA	GATCGAAATATATACGTTTT	G	499017
1133-4_B5	WT	MMS	XIV	373815	364353	SNP	1	G	2	G/A	50.7/49.3	37/36	73	G	50.685	37	A	49.315	36	CCATATGCTAGGTACTAAGA	TACGCAGGGGCGGAACCGCG	CCATATGCTAGGTACTAAGA	TACGCAGGGGCGGAACCGCG	A
1133-4_B5	WT	MMS	XIV	430392	420930	SNP	1	A	2	G/A	52.5/47.5	32/29	61	G	52.459	32	A	47.541	29	TCTAAAAGGAAGAAGAATAT	AAAAGGGAGAAAGACCACCA	TCTAAAAGGAAGAAGAATAT	AAAAGGGAGAAAGACCACCA	G	56577
1133-4_B5	WT	MMS	XIV	450285	440811	SNP	1	G	2	G/T	53.4/46.6	39/34	73	G	53.425	39	T	46.575	34	ATGACGAGAATGAAAATAGG	CTATGAAAGCACCAGCTGTA	ATGACGAGAATGAAAATAGG	CTATGAAAGCACCAGCTGTA	T	19893
1133-4_B5	WT	MMS	XV	288276	284848	SNP	1	G	2	T/G	51.6/48.4	32/30	62	T	51.613	32	G	48.387	30	GGGCGTTCGACTCGCCCCCG	GAGATATTTTTTTACTTTTG	GGGCGTTCGACTCGCCCCCG	GAGATATTTTTTTACTTTTG	T
1133-4_B5	WT	MMS	XVI	107650	94688	SNP	1	A	2	A/T	54.9/45.1	50/41	91	A	54.945	50	T	45.055	41	GACAAAGATTTTTGAAGCTT	TCCAGGACTACAGAATTGTG	GACAAAGATTTTTGAAGCTT	TCCAGGACTACAGAATTGTG	T
1133-4_B5	WT	MMS	XVI	431227	418265	SNP	1	A	2	A/G	51.3/48.7	39/37	76	A	51.316	39	G	48.684	37	GCAGGAGCAAATGGGCGGGC	AACATTTACGCTGAAAGACT	GCAGGAGCAAATGGGCGGGC	AACATTTACGCTGAAAGACT	G	323577
1133-4_B5	WT	MMS	XIV	569855	559519	DIP	1	A	2	A/-	50.7/49.3	36/35	71	A	50.704	36	-	49.296	35	ATAAATCACATTGCCAATGC	AAAAAAAAGAATGGTCTCTA	ATAAATCACATTGCCAATGC	AAAAAAAAGAATGGTCTCTA	-
1133-4_B6	WT	MMS	I	192781	189379	SNP	1	A	2	A/T	52.9/47.1	27/24	51	A	52.941	27	T	47.059	24	TCCAACAAGTGCTCCATCTC	TGCTCCACTATGCCGTGCAA	TCCAACAAGTGCTCCATCTC	TGCTCCACTATGCCGTGCAA	T
1133-4_B6	WT	MMS	II	760907	750629	SNP	1	G	2	G/C	50.6/49.4	40/39	79	G	50.633	40	C	49.367	39	CACCGATCCTTAGTGTTGTT	CTATTATTGCTATGTAATTA	CACCGATCCTTAGTGTTATT	CTATTATTGCTATGTAATTA	C
1133-4_B6	WT	MMS	IV	1176866	1143794	SNP	1	T	2	T/C	51.7/48.3	31/29	60	T	51.667	31	C	48.333	29	TGGTGATCCTATTCGCATTG	GTTCGGTAGAATATTATTTT	TGGTGATCCTATTCGCATTG	GTTCGGTAGAATATTATTTT	C
1133-4_B6	WT	MMS	IV	1432235	1393803	SNP	1	C	2	C/T	51.5/48.5	34/32	66	C	51.515	34	T	48.485	32	ATTTTATGGTCCGACTTCGG	GATACTACTTTAGGTTTGGC	ATTTTATGGTCCGACTTCGG	GATACTACTTTAGGTTTGGC	T	255369
1133-4_B6	WT	MMS	IV	1434569	1396137	SNP	1	C	2	C/T	51.7/48.3	30/28	58	C	51.724	30	T	48.276	28	CCATTTTCCCAACGATTTTT	AACGGTTTTTTTGCCTGCAG	CCATTTTCCCAACGATTTTT	AACGGTTTTTTTGCCTGCAG	T	2334
1133-4_B6	WT	MMS	VII	39822	33489	SNP	1	G	2	G/C	53.6/46.4	37/32	69	G	53.623	37	C	46.377	32	GGATTTATTAGGAATCAAGG	TGATAGAATAACCTACTCAT	GGATTTATTAGGAATCAAGG	TGATAGAATAACCTACTCAT	C
1133-4_B6	WT	MMS	VII	102723	96392	SNP	1	C	2	C/G	50.6/49.4	39/38	77	C	50.649	39	G	49.351	38	ATGTAGTCCTCCAAAGAATT	ATCCATGATATTTCTAAAAC	ATGTAGTCCTCCAAAGAATT	ATCCATGATATTTCTAAAAC	G	62901
1133-4_B6	WT	MMS	VII	115581	109250	SNP	1	G	2	G/A	51.1/48.9	48/46	94	G	51.064	48	A	48.936	46	GGGTTCGAGCCCCCTATGAG	AGTTCTTCTTTATTTTTTTC	GGGTTCGAGCCCCCTATGAG	AGTTCTTCTTTATTTTTTTC	A	12858
1133-4_B6	WT	MMS	VII	1023724	997513	SNP	1	T	2	C/T	52.3/47.7	34/31	65	C	52.308	34	T	47.692	31	CTCACTCAATATTCTCTTGG	TGGGTCCGAAAATGGCCATG	CTCACTCAATATTCTCTTGG	TGGGTTCGAAAATGGCCATG	C	908143
1133-4_B6	WT	MMS	VIII	8755	8757	SNP	1	A	2	G/A	50.7/49.3	35/34	69	G	50.725	35	A	49.275	34	TCTGAAAACTGTATAGTTTA	TGCTGTGACAGTAGCCATAT	TCTGAAAACTGTATAGTTTA	TGCTGTGACAGTAGCCATAT	G
1133-4_B6	WT	MMS	VIII	18063	18066	SNP	1	G	2	T/G	54.9/45.1	45/37	82	T	54.878	45	G	45.122	37	AAAAATTTTATAGTTGCCTT	GGATGACAAACAGCTGGATA	AAAAATTTTATAGTTGCCTT	GGATGACAAACAGCTGGATA	T	9308
1133-4_B6	WT	MMS	VIII	25760	25763	SNP	1	T	2	C/T	50.6/49.4	41/40	81	C	50.617	41	T	49.383	40	ACTATCAACACATTTGACTA	CATTTTGGCAAATTCACTCA	ACTATCAACACATTTGACTA	CATTTTGGCAAATTCACTCA	C	7697
1133-4_B6	WT	MMS	VIII	46637	46639	SNP	1	T	2	T/C	51.1/48.9	24/23	47	T	51.064	24	C	48.936	23	AAATTTATCGTGTCCATGTT	GGTTTGGGCCTCCAACCGAG	AAATTTATCGTGTCCATGTT	GGTTTGGGCCTCCAACCGAG	C	20877
1133-4_B6	WT	MMS	VIII	254776	246900	SNP	1	T	2	T/C	50.9/49.1	29/28	57	T	50.877	29	C	49.123	28	TGCAGATGTCTTGAACCTAA	GAATATTGGAAGTAACTTGT	TGCAGATGTCTTGAACCTAA	GAATATTGGAAGTAACTTGT	C	208139
1133-4_B6	WT	MMS	VIII	528381	520504	SNP	1	A	2	A/T	53.1/46.9	43/38	81	A	53.086	43	T	46.914	38	ACAGACAGCTTCCGCGACCG	TGTGATTGGTCACAGCAGTA	ACAGACAGCTTCCGCGACCG	TGTGATTGGTCACAGCAGTA	T	273605
1133-4_B6	WT	MMS	IX	173246	157068	SNP	1	T	2	T/C	53.4/46.6	39/34	73	T	53.425	39	C	46.575	34	GGCAAACCCAAATGATATTG	CAAATTTTTCACTGAGTTTG	GGCAAACCCAAATGATATTG	CAAATTTTTCACTGAGTTTG	C
1133-4_B6	WT	MMS	IX	389685	373507	SNP	1	C	2	C/T	53.1/46.9	51/45	96	C	53.125	51	T	46.875	45	AACAGAGTATGTAGCGACTG	AGAACCAGAAGCAGATTGTA	AACAGAGTATGTAGCGACTG	AGAACCAGAAGCAGATTGTA	T	216439
1133-4_B6	WT	MMS	X	98851	84952	SNP	1	A	2	A/T	52.6/47.4	41/37	78	A	52.564	41	T	47.436	37	ACCATTCTGTCCTAGAAGGA	GGACAAGCTTGTTGAGTACA	ACCATTCTGTCCTAGAAGGA	GGACAAGCTTGTTGAGTACA	T
1133-4_B6	WT	MMS	X	326277	312379	SNP	1	C	2	C/T	53.4/46.6	47/41	88	C	53.409	47	T	46.591	41	AATGCCTGCTAATAACTCTT	GATAATTCGTTGATTTCTAT	AATGCCTGCTAATAACTCTT	GATAATTCGTTGATTTCTAT	T	227426
1133-4_B6	WT	MMS	XI	440227	440228	SNP	1	A	2	T/A	50.6/49.4	41/40	81	T	50.617	41	A	49.383	40	TAATTTTTTTAAAATTTTAA	TATGTTTTTATCATGTGACT	TAATTTTTTTAAAATTTTAA	TATGTTTTTATCATGTGACT	T
1133-4_B6	WT	MMS	XII	60324	52945	SNP	1	T	2	T/C	54.2/45.8	32/27	59	T	54.237	32	C	45.763	27	CAACTCCAACCCGCCTAATT	TAAGTTAATGTTGTATCTTT	CAACTCCAACCCGCCTAATT	TAAGTTAATGTTGTATCTTT	C
1133-4_B6	WT	MMS	XII	440358	429227	SNP	1	C	2	T/C	51.1/48.9	24/23	47	T	51.064	24	C	48.936	23	GAAGATTTTTTTTTCTGCTT	GTAGTTTTAAATTAGAAGTT	GAAGATTTTTTTTTCTGCTT	GTAGTTTTAAATTAGAAGTT	T	380034
1133-4_B6	WT	MMS	XII	447766	436635	SNP	1	C	2	C/G	50.0/50.0	17/17	34	C	50	17	G	50	17	TTCAGAACACTGTTTTCAAT	TCGAAGTAAAAAACGATAAA	TTCAGAACACTGTTTTCAAT	TCGAAGTAAAAAACGATAAA	G	7408
1133-4_B6	WT	MMS	XII	450425	439294	SNP	1	C	2	A/C	54.2/45.8	32/27	59	A	54.237	32	C	45.763	27	ACCTTAATACTGCTGGTGCA	CACGATAATGATTACTTCTT	ACCTTAATACTGCTGGTGCA	CACGATAATGATTACTTCTT	A	2659
1133-4_B6	WT	MMS	XIII	164105	159491	SNP	1	A	2	T/A	54.3/45.7	57/48	105	T	54.286	57	A	45.714	48	TCCATCAATTCCTGGACAGA	AGACCGTCCTTGGAACTGTA	TCCATCAATTCCTGGACAGA	AGACCGTCCTTGGAACTGTA	T
1133-4_B6	WT	MMS	XIV	38463	32891	SNP	1	A	2	A/T	51.6/48.4	32/30	62	A	51.613	32	T	48.387	30	TTCGAACAAAAAGATTTTCG	ATTTCCACTTGGTTCACACA	TTCGAACAAAAAGATTTTCG	ATTTCCACTTGGTTCACACA	T
1133-4_B6	WT	MMS	XIV	390111	380875	SNP	1	C	2	C/T	52.8/47.2	38/34	72	C	52.778	38	T	47.222	34	TGAGTAGGCGACGTAACTAT	GCGTATATAACATGAATCAG	TGAGTAGGCGACGTAACTAT	GCGTATATAACATGAATCAG	T	351648
1133-4_B6	WT	MMS	XIV	641235	631086	SNP	1	G	2	C/G	50.7/49.3	34/33	67	C	50.746	34	G	49.254	33	TATGAACCCAATAAAATGAC	AGTGCTGCGTATGATTGGAG	TATGAACCCAATAAAATGAC	AGTGCTGCGTATGATTGGAG	C	251124
1133-4_B6	WT	MMS	XV	31378	31379	SNP	1	C	2	C/A	53.5/46.5	38/33	71	C	53.521	38	A	46.479	33	TGGAGCAATGGAGCTCGAGA	TTCGGTGGAGGATGACGTTA	TGGAGCAATGGAGCTCGAGA	TTCGGTGGAGGATGACGTTA	A
1133-4_B6	WT	MMS	XV	379245	375797	SNP	1	C	2	T/C	54.2/45.8	26/22	48	T	54.167	26	C	45.833	22	GGGTCACATTTCTTGAATCC	AAATACCAGATTTCTTCAAG	GGGTCACATTTCTTGAATCC	AAATACCAGATTTCTTCAAG	T	347867
1133-4_B6	WT	MMS	XV	600495	592668	SNP	1	G	2	G/T	52.9/47.1	18/16	34	G	52.941	18	T	47.059	16	AAGATGATGACATAAGTTAT	AGAAGCTGTCATCGAAGTTA	AAGATGATGACATAAGTTAT	AGAAGCTGTCATCGAAGTTA	T	221250
1133-4_B6	WT	MMS	IV	1525430	1486996	DIP	2	GG	2	--/GG	48.7/39.7	38/31	78	--	48.718	38	GG	39.744	31	GGGTGTGGTGTGGGTGTGGT	GTGTGGTGTGGTGTGTGTGG	GGGTGTGGTGTGGGTGT-GT	GTG-GGTGTGGTGTGTGT-G	--
1133-4_B9	WT	MMS	II	653537	643434	SNP	1	A	2	T/A	51.2/48.8	44/42	86	T	51.163	44	A	48.837	42	GCAAACAGATACTAATGCTG	AGTTCTAAACACCGATAACA	GCAAACAGATACTAATGCTG	AGTTCTAAACACCGATAACA	T
1133-4_B9	WT	MMS	II	760725	750619	SNP	1	G	2	G/A	51.4/48.6	37/35	72	G	51.389	37	A	48.611	35	GAGGTATCCGAAGAAGAAGA	CCCGTACACAATGAAGAACT	GAGGTATCCGAAGAAGAAGA	CCCGTACACAATGAAGAACT	A	107188
1133-4_B9	WT	MMS	II	767210	757107	SNP	1	C	2	C/A	50.6/49.4	39/38	77	C	50.649	39	A	49.351	38	GACAATAGTTTCCAACGAAT	CAAATATGCCAATGAGAAAA	GACAATAGTTTCCAACGAAT	CAAATATGCCAATGAGAAAA	A	6485
1133-4_B9	WT	MMS	III	57780	56972	SNP	1	G	2	G/A	51.9/48.1	42/39	81	G	51.852	42	A	48.148	39	TAACAACTCTGTAAAACTTA	AGATTAAAGACAATGGAGCA	TAACAACTCTGTAAAACTTA	AGATTAAAGACAATGGAGCA	A
1133-4_B9	WT	MMS	III	60981	60173	SNP	1	C	2	A/C	51.7/48.3	30/28	58	A	51.724	30	C	48.276	28	GCCATTAATCTCATATAACG	AGCCTGAATGTCTGCGCCTT	GCCATTAATCTCATATAACG	AGCCTGAATGTCTGCGCCTT	A	3201
1133-4_B9	WT	MMS	IV	190593	183631	SNP	1	G	2	G/T	52.6/47.4	41/37	78	G	52.564	41	T	47.436	37	TGTGAACCGGCCATGTATTT	ATCTTCCCTTTTATTTGCTT	TGTGAACCGGCCATGTATTT	ATCTTCCCTTGTATTTGCTT	T
1133-4_B9	WT	MMS	IV	191650	184688	SNP	1	G	2	T/G	52.7/47.3	39/35	74	T	52.703	39	G	47.297	35	AAGTTGCGCAGTATCTGCAA	AAATTTATCAAACAGACGCC	AAGTTGCGCAGTATCTGCAA	AAATTTATCAAACAGACGCC	T	1057
1133-4_B9	WT	MMS	IV	272054	265091	SNP	1	T	2	T/C	53.0/47.0	35/31	66	T	53.03	35	C	46.97	31	ATTCTGGATATGCCGCATCG	CCGAAGTGATGTATTAAAAT	ATTCTGGATATGCCGCATCG	CCGAAGTGATGTATTAAAAT	C	80404
1133-4_B9	WT	MMS	IV	1037340	1010221	SNP	1	A	2	T/A	50.9/49.1	29/28	57	T	50.877	29	A	49.123	28	AAATTCGATCATAACAAGAA	CAAGTTACAATCTGTTATAC	AAATTCGATCATAACAAGAA	CAAGTTACAATCTGTTATAC	T	765286
1133-4_B9	WT	MMS	IV	1394034	1354871	SNP	1	A	2	T/A	51.1/48.9	47/45	92	T	51.087	47	A	48.913	45	ATCGTCATCACTACCAACTG	TTCTTCTTTTTGACCATCAA	ATCGTCATCACTACCAACTG	TTCTTCTTTTTGACCATCAA	T	356694
1133-4_B9	WT	MMS	IV	1509839	1470676	SNP	1	C	2	C/G	51.3/48.8	41/39	80	C	51.25	41	G	48.75	39	ATAACTTTAGTATTTTAACA	CAGACGATCTGTCTTTTGAG	ATAACTTTAGTATTTTAACA	CAGACGATCTGTCTTTTGAG	G	115805
1133-4_B9	WT	MMS	V	308574	308565	SNP	1	G	2	G/A	52.8/47.2	47/42	89	G	52.809	47	A	47.191	42	ACGTAATCTAAAGTAAAATA	CAAGCAGTCATAAATGAAAA	ACGTAATCTAAAGTAAAATA	CAAGCAGTCATAAATGAAAA	A
1133-4_B9	WT	MMS	V	550940	542358	SNP	1	T	2	T/A	54.3/45.7	51/43	94	T	54.255	51	A	45.745	43	TAATCATTTTCTTGCTTTAG	TGCTCACACACCTCTTGCTG	TAATCATTTTCTTGCTTTAG	TGCTCACACACCTCTTGCTG	A	242366
1133-4_B9	WT	MMS	VI	43946	43521	SNP	1	G	2	T/G	50.6/49.4	41/40	81	T	50.617	41	G	49.383	40	TTATCGTATCTTTCGAATTC	TTTCTTTCCTCAGTAGAAGC	TTATCGTATCTTTCGAATTC	TTTCTTTCCTCAGTAGAAGC	T
1133-4_B9	WT	MMS	VII	34816	28333	SNP	1	T	2	C/T	50.4/49.6	58/57	115	C	50.435	58	T	49.565	57	GATAAAGCGGTAAACGATCT	TTAACTGAATTTCAGAGAGT	GATAAAGCGGTAAACGATCT	TTAACTGAATTTCAGAGAGT	C
1133-4_B9	WT	MMS	VIII	560528	543103	SNP	1	G	2	A/G	50.0/50.0	2018-05-05	10	A	50	5	G	50	5	CAGCATCAACGTCAGGACTA	TGCGACTACCACTGAAAGTA	CAGCATCAACGTCAGGACTA	TGCTACTACCACTGCCAGCA	A
1133-4_B9	WT	MMS	IX	235001	218806	SNP	1	C	2	G/C	54.2/45.8	45/38	83	G	54.217	45	C	45.783	38	TCTTTAGCCATAACAACAAC	TGCTCTTGAAAGTCGCGTGC	TCTTTAGCCATAACAACAAC	TGCTCTTGAAAGTCGCGTGC	G
1133-4_B9	WT	MMS	X	282285	268170	SNP	1	A	2	A/C	52.2/47.8	36/33	69	A	52.174	36	C	47.826	33	GCTGACTTTGATATACCACC	AACGATAATGGATCGAGGGC	GCTGACTTTGATATACCACC	AACGATAATGGATCGAGGGC	C
1133-4_B9	WT	MMS	X	536580	516252	SNP	1	G	2	G/T	52.7/47.3	39/35	74	G	52.703	39	T	47.297	35	GTTATTAATGGTCTTACGCT	TGGTCAGTTCTCGTAACAGT	GTTATTAATGGTCTTACGCT	TGGTCAGTTCTCGTAACAGT	T	254295
1133-4_B9	WT	MMS	X	541577	521249	SNP	1	G	2	A/G	53.2/46.8	41/36	77	A	53.247	41	G	46.753	36	GGGTTCAATTCCCCGTCGCG	AGATTTTTTTGGCTACTGTT	GGGTTCAATTCCCCGTCGCG	AGATTTTTTTGGCTACTGTT	A	4997
1133-4_B9	WT	MMS	X	617785	597456	SNP	1	A	2	G/A	54.2/45.8	32/27	59	G	54.237	32	A	45.763	27	CCGTGGTATCTGGTCTATAG	AATGGGTACTGTTTCATTTA	CCGTGGTATCTGGTCTATAG	AATGGGTACTGTTTCATTTA	G	76208
1133-4_B9	WT	MMS	XI	111761	111767	SNP	1	C	2	C/A	53.7/46.3	36/31	67	C	53.731	36	A	46.269	31	TTTTCTCTAACTGATATATT	TAGCCTGCGTAGTTTCCAAC	TTTTCTCTAACTGATATATT	TAGCCTGCGTAGTTTCCAAC	A
1133-4_B9	WT	MMS	XI	340412	340418	SNP	1	T	2	T/C	51.0/49.0	26/25	51	T	50.98	26	C	49.02	25	CGCTCACATATTTCTGAATA	GTAGCCACGTGTGGGATGAT	CGCTCACATATTTCTGAATA	GTAGCCACGTGTGGGATGAT	C	228651
1133-4_B9	WT	MMS	XII	373179	362069	SNP	1	C	2	C/G	51.4/48.6	38/36	74	C	51.351	38	G	48.649	36	GAAAGACCTTTTTAAGACTC	AAGAACCGTCACTTATGGCG	GAAAGACCTTTTTAAGACTC	AAGAACCGTCACTTATGGCG	G
1133-4_B9	WT	MMS	XIII	527815	509362	SNP	1	A	2	G/A	52.4/47.6	33/30	63	G	52.381	33	A	47.619	30	GCTTGTATAATGGAGCACAG	TATAACGTGTTTAATGATAC	GCTTGTATAATGGAGCACAG	TATAACGTGTTTAATGATAC	G
1133-4_B9	WT	MMS	XIV	145783	136167	SNP	1	T	2	C/T	50.7/49.3	38/37	75	C	50.667	38	T	49.333	37	GTTGAGATGGCTCTATGTGG	TTTCAAATGGTTCGTCAAAG	GTTGAGATGGCTCTATGTGG	TTTCAAATGGTTCGTCAAAG	C
1133-4_B9	WT	MMS	XIV	513124	503495	SNP	1	T	2	T/G	51.1/48.9	48/46	94	T	51.064	48	G	48.936	46	TGATGTTGTTCATGTATATT	TCGCTATCATGAGGTCTAGG	TGATGTTGTTCATGTATATT	TCGCTATCATGAGGTCTAGG	G	367341
1133-4_B9	WT	MMS	XVI	494971	478412	SNP	1	T	2	C/T	53.2/46.8	41/36	77	C	53.247	41	T	46.753	36	TAAGGAAACGTTCGCCTAGG	CAAATGAAATCAAAAACCAG	TAAGGAAACGTTCGCCTAGG	CAAATGAAATCAAAAACCAG	C
1247_A10	csm2Δ	MMS	I	55438	54828	SNP	1	A	2	G/A	51.8/48.2	58/54	112	G	51.786	58	A	48.214	54	TAGTAAAAGGTTCTGATTAA	TTTGATAAAATTGCTTTCAT	TAGTAAAAGGTTCTGATTAA	TTTGATAAAATTGCTTTCAT	G
1247_A10	csm2Δ	MMS	I	66474	65864	SNP	1	T	2	C/T	53.8/46.2	57/49	106	C	53.774	57	T	46.226	49	AAACTGGAGGGGAAAGAATT	TGGTCCATTGCTATATCCAA	AAACTGGAGGGGAAAGAATT	TGGTCCATTGCTATATCCAA	C	11036
1247_A10	csm2Δ	MMS	I	84998	84388	SNP	1	G	2	G/T	51.0/49.0	51/49	100	G	51	51	T	49	49	TGTAGCACAGCCGGCTTCTT	TACCAACCCACCTTTGTTGG	TGTAGCACAGCCGGCTTCTT	TACCAACCCACCTTTGTTGG	T	18524
1247_A10	csm2Δ	MMS	I	176885	173680	SNP	1	C	2	A/C	51.1/48.9	47/45	92	A	51.087	47	C	48.913	45	GTAGTATTCAGCCAAATGAG	TCTGATATCGGAAACATAAA	GTAGTATTCAGCCAAATGAG	TCTGATATCGGAAACATAAA	A	91887
1247_A10	csm2Δ	MMS	I	180359	177154	SNP	1	G	2	C/G	50.5/49.5	52/51	103	C	50.485	52	G	49.515	51	TTCGTACCTGTGTATTTTTG	ATATAAGAGTGTTTCTGATC	TTCGTACCTGTGTATTTTTG	ATATAAGAGTGTTTCTGATC	C	3474
1247_A10	csm2Δ	MMS	I	181168	177963	SNP	1	C	2	C/A	51.0/49.0	53/51	104	C	50.962	53	A	49.038	51	TGGCCGAGCGGTCTAAGGCG	CTGATTCAAGAAATATCTTG	TGGCCGAGCGGTCTAAGGCG	CTGATTCAAGAAATATCTTG	A	809
1247_A10	csm2Δ	MMS	II	61365	59371	SNP	1	C	2	A/C	50.6/49.4	45/44	89	A	50.562	45	C	49.438	44	TATGAGTCCTCAGTTTTGCA	GTTGTGCTCGTGACATATGA	TATGAGTCCTCAGTTTTGCA	GTTGTGCTCGTGACATATGA	A
1247_A10	csm2Δ	MMS	II	70529	68535	SNP	1	T	2	T/A	52.7/47.3	48/43	91	T	52.747	48	A	47.253	43	GCGCAAGGGACTTCTTTAAT	TGGGGCGCTGATGGCACCTG	GCGCAAGGGACTTCTTTAAT	TGGGGCGCTGATGGCACCTG	A	9164
1247_A10	csm2Δ	MMS	II	135924	133925	SNP	1	A	2	A/C	53.5/46.5	61/53	114	A	53.509	61	C	46.491	53	ATATACATGTTACCCTACCC	GTCCGGGTTATGTAAATCGT	ATATACATGTTACCCTACCC	GTCCGGGTTATGTAAATCGT	C	65395
1247_A10	csm2Δ	MMS	II	147176	145177	SNP	1	G	2	T/G	53.9/46.1	48/41	89	T	53.933	48	G	46.067	41	TCAATCGAGTTTCCAATTTC	CAACCTTTATTATAGTACTA	TCAATCGAGTTTCCAATTTC	CAACCTTTATTATAGTACTA	T	11252
1247_A10	csm2Δ	MMS	II	159980	157981	SNP	1	C	2	T/C	50.6/49.4	44/43	87	T	50.575	44	C	49.425	43	CTATCCCTTTTAACGAAAGC	CTTTTGTTTTTTTTCTGTGT	CTATCCCTTTTAACGAAAGC	CTTTTGTTTTTTTTCTGTGT	T	12804
1247_A10	csm2Δ	MMS	II	160386	158387	SNP	1	G	2	G/A	54.7/45.3	52/43	95	G	54.737	52	A	45.263	43	TAAGGGCTCCACCATCTCAC	CATAAGAGCTGCAAACGCCG	TAAGGGCTCCACCATCTCAC	CATAAGAGCTGCAAACTCCG	A	406
1247_A10	csm2Δ	MMS	II	226858	224618	SNP	1	T	2	T/C	51.8/48.2	29/27	56	T	51.786	29	C	48.214	27	TTTGAGGATTCCTATATCCT	GAGGAGAACTTCTAGTATAT	TTTGAGGATTCCTATATCCT	GAGGAGAACTTCTAGTATAT	C	66472
1247_A10	csm2Δ	MMS	II	318136	309684	SNP	1	C	2	C/T	54.0/46.0	47/40	87	C	54.023	47	T	45.977	40	CGCGCAATGTAACAAAGCTC	AGAAATTTTTTATAAATACT	CGCGCAATGTAACAAAGCTC	AGAAATTTTTTATAAATACT	T	91278
1247_A10	csm2Δ	MMS	II	323683	315231	SNP	1	T	2	T/A	51.3/48.8	41/39	80	T	51.25	41	A	48.75	39	ACTCCGGTATAATGGCGAGT	GAGGCAATAGTCCCCTACGT	ACTCCGGTATAATGGCGAGT	GAGGCAATAGTCCCCTACGT	A	5547
1247_A10	csm2Δ	MMS	II	357707	349255	SNP	1	G	2	G/A	53.1/46.9	52/46	98	G	53.061	52	A	46.939	46	CCTTTGATAGTTCCTGAACC	CCGGCATCTTCGATACCGCC	CCTTTGATAGTTCCTGAACC	CCGGCATCTTCGATACCGCC	A	34024
1247_A10	csm2Δ	MMS	II	392889	384436	SNP	1	T	2	C/T	53.6/46.4	60/52	112	C	53.571	60	T	46.429	52	TGAAGATCTTTCCTCTGCAT	TTCTTTCCTTCTTTATCTTT	TGAAGATCTTTCCTCTGCAT	TTCTTTCCTTCTTTATCTTT	C	35182
1247_A10	csm2Δ	MMS	II	454350	445897	SNP	1	C	2	T/C	51.3/48.7	60/57	117	T	51.282	60	C	48.718	57	CTCATCTAAATTAGAGATGT	CAACCTCATTTCGTAACGGA	CTCATCTAAATTAGAGATGT	CAACCTCATTTCGTAACGGA	T	61461
1247_A10	csm2Δ	MMS	II	510920	502467	SNP	1	A	2	A/G	51.3/48.8	41/39	80	A	51.25	41	G	48.75	39	ATACATGAAAAGTATCAAGA	AATTCCTCGGTTAATGCTCG	ATACATGAAAAGTATCAAGA	AATTCCTCGGTTAATGCTCG	G	56570
1247_A10	csm2Δ	MMS	II	540433	531980	SNP	1	G	2	G/A	53.3/46.7	48/42	90	G	53.333	48	A	46.667	42	AAGGGGATCAGCGGACTGGT	AAGACTCCGGTTGATGATTC	AAGGGGATCAGCGGACTGGT	AAGACTCCGGTTGATGATTC	A	29513
1247_A10	csm2Δ	MMS	II	643012	634560	SNP	1	G	2	A/G	54.6/45.4	53/44	97	A	54.639	53	G	45.361	44	GCAAAAAAAAAAAGAAGCTC	CACTCAGGATCGAACTAAGG	GC---AAAAAAAAGAAGCTC	CACTCAGGATCGAACTAAGG	A	102579
1247_A10	csm2Δ	MMS	II	645116	636291	SNP	1	T	2	T/A	54.8/45.2	63/52	115	T	54.783	63	A	45.217	52	GGCAATAGAAAGCCCTCCAG	TTAAACTTGACATAGAAAAT	GGCAATAGAAAGCCCTCCAG	TTAAACTTGACATAGAAAAT	A	2104
1247_A10	csm2Δ	MMS	II	687318	678493	SNP	1	C	2	G/C	51.7/48.3	61/57	118	G	51.695	61	C	48.305	57	TGATTTCAAGAAGTTTAGGA	CTGAATTTGGTGGATCCATT	TGATTTCAAGAAGTTTAGGA	CTGAATTTGGTGGATCCATT	G	42202
1247_A10	csm2Δ	MMS	III	10653	10653	SNP	1	C	2	G/C	53.9/44.7	41/34	76	G	53.947	41	C	44.737	34	TTGCTATTACCGGGGTTTTC	CTTGGATTTGCTCTACAAGC	TTGCTATTACCGGGGTTTTC	CTTGGATTTGCTCTACAAGC	G
1247_A10	csm2Δ	MMS	III	17619	16829	SNP	1	C	2	C/A	51.1/48.9	68/65	133	C	51.128	68	A	48.872	65	AGGTTGAACGAGCTGGCCAC	GTCCCAAATGAAGCGCCTAA	AGGTTGAACGAGCTGGCCAC	GTCCCAAATGAAGCGCCTAA	A	6966
1247_A10	csm2Δ	MMS	III	19715	18925	SNP	1	C	2	C/A	50.6/48.2	43/41	85	C	50.588	43	A	48.235	41	TAGCTCTAAGCTATTTTTTG	TCTTTTATTACGAAATCCTC	TAGCTCTAAGCTATTTTTTG	TCTTTTATTACGAAATCCTC	A	2096
1247_A10	csm2Δ	MMS	III	35456	34666	SNP	1	T	2	A/T	53.9/46.1	48/41	89	A	53.933	48	T	46.067	41	CGATTTGATTATGATTAGCG	TTCCATTATTTGATCTTTTT	CGATTTGATTATGATTAGCG	TTCCATTATTTGATCTTTTT	A	15741
1247_A10	csm2Δ	MMS	III	58497	57707	SNP	1	G	2	G/C	51.4/48.6	57/54	111	G	51.351	57	C	48.649	54	TGTTCTTCTTCTTTCTTGTG	CATCCAAGTCTTCTATTGAG	TGTTCTTCTTCTTTCTTGTG	CATCCAAGTCTTCTATTGAG	C	23041
1247_A10	csm2Δ	MMS	III	79922	79132	SNP	1	T	2	T/A	50.5/49.5	50/49	99	T	50.505	50	A	49.495	49	AATGCCCAATGACACCGAAA	TTCCAGAGATGCACAAGATT	AATGCCCAATGACACCGAAA	TTCCAGAGATGCACAAGATT	A	21425
1247_A10	csm2Δ	MMS	III	100895	94959	SNP	1	A	2	T/A	51.1/48.9	47/45	92	T	51.087	47	A	48.913	45	AGAAAGAGGGGTTCCTTCGA	AGAAACAAAAAGACGAGCCC	AGAAAGAGGGGTTCCTTCGA	AGAAACAAAAAGACGAGCCC	T	20973
1247_A10	csm2Δ	MMS	III	145254	139318	SNP	1	G	2	A/G	52.3/47.7	46/42	88	A	52.273	46	G	47.727	42	ATACAAAGACGTCAACGAGA	TGTCATTGTACGTTTGAAGT	ATACAAAGACGTCAACGAGA	TGTCATTGTACGTTTGAAGT	A	44359
1247_A10	csm2Δ	MMS	III	213762	204113	SNP	1	A	2	T/A	52.4/47.6	43/39	82	T	52.439	43	A	47.561	39	CGTTGTACCTGACCTTATGA	CTGCCACCATACCACGTGTG	CGTTGTACCTGACCTTATGA	CTGCCACCATACCACGTGTG	T	68508
1247_A10	csm2Δ	MMS	III	215498	205849	SNP	1	G	2	G/T	51.6/48.4	49/46	95	G	51.579	49	T	48.421	46	ATCAAGATAGCACCATGGGC	ATAACGACAACGGCGAGGAT	ATCAAGATAGCACCATGGGC	ATAACGACAACGGCGAGGAT	T	1736
1247_A10	csm2Δ	MMS	III	237942	228293	SNP	1	C	2	C/A	54.8/45.2	63/52	115	C	54.783	63	A	45.217	52	CTCTCGATAAAGGGAACCAG	GCTCAGGGTTTGCCAGGGTC	CTCTCGATAAAGGGAACCAG	GCTCAGGGTTTGCCAGGGTC	A	22444
1247_A10	csm2Δ	MMS	III	280781	271132	SNP	1	G	2	C/G	50.5/49.5	56/55	111	C	50.45	56	G	49.55	55	TTTACAAAATGATCCCACAC	GAGTTGGTTGACACCTCCGA	TTTACAAAATGATCCCACAC	GAGTTGGTTGACACCTCCGA	C	42839
1247_A10	csm2Δ	MMS	III	290855	281206	SNP	1	A	2	G/A	53.2/46.8	59/52	111	G	53.153	59	A	46.847	52	ACTTTTGTAAGGTCTCCAAC	AGTATATTTGATAAATAGAC	ACTTTTGTAAGGTCTCCAAC	AGTATATTTGATAAATAGAC	G	10074
1247_A10	csm2Δ	MMS	III	295510	285858	SNP	1	C	2	A/C	52.1/47.9	50/46	96	A	52.083	50	C	47.917	46	ATGGCCAAGTTGGTAAGGCG	CACACTAGTAATGTGGAGAT	ATGGCCAAGTTGGTAAGGCG	CACACTAGTAATGTGGAGAT	A	4655
1247_A10	csm2Δ	MMS	III	295523	285871	SNP	1	G	2	G/T	52.3/47.7	46/42	88	G	52.273	46	T	47.727	42	TAAGGCGCCACACTAGTAAT	TGGAGATCATCGGTTCAAAT	TAAGGCGACACACTAGTAAT	TGGAGATCATCGGTTCAAAT	T	13
1247_A10	csm2Δ	MMS	IV	91275	84906	SNP	1	C	2	C/T	50.0/50.0	40/40	80	C	50	40	T	50	40	AAGGATGAATTCATTACAAC	TAAGGATTTTTACAAATATT	AAGGATGAATTCATTACAAC	TAAGGATTTTTACAAATATT	T
1247_A10	csm2Δ	MMS	IV	93462	87093	SNP	1	T	2	A/T	51.1/48.9	46/44	90	A	51.111	46	T	48.889	44	TACCCCCCAGCTCGAAACCC	CTGGTAGTAAAGTGGGCATG	TACCCCCCAGCTCGAAACCC	CTGGTAGTAAAGTGGGCATG	A	2187
1247_A10	csm2Δ	MMS	IV	148574	142205	SNP	1	C	2	G/C	54.8/45.2	46/38	84	G	54.762	46	C	45.238	38	GGGTCAAACCCGGTGACCAA	ACCAGGTCTCGTATCAGCGC	GGGTCAAACCCGGTGACCAA	ACCAGGTCTCGTATCAGCGC	G	55112
1247_A10	csm2Δ	MMS	IV	178642	172261	SNP	1	T	2	T/C	51.3/48.7	59/56	115	T	51.304	59	C	48.696	56	TCGTCTCATGATCTTATCGA	GATGCAGATATGTCTTCAAA	TCGTCTCATGATCTTATCGA	GATGCAGATATGTCTTCAAA	C	30068
1247_A10	csm2Δ	MMS	IV	182902	176515	SNP	1	T	2	A/T	54.9/45.1	56/46	102	A	54.902	56	T	45.098	46	CTGTCGCCAAAGGTGGATTG	CCAAGTAAAACCTTTTCCCT	CTGTCGCCAAAGGTGGATTG	CCAAGTAAAACCTTTTCCCT	A	4260
1247_A10	csm2Δ	MMS	IV	219488	213101	SNP	1	G	2	T/G	50.6/49.4	45/44	89	T	50.562	45	G	49.438	44	TAATGATCAGAATGATTAAA	CGTTGGGGAGGAAAAAAAGC	TAATGATCAGAATGATTAAA	CGTTGGGGAGGAAAAAAAGC	T	36586
1247_A10	csm2Δ	MMS	IV	222660	216273	SNP	1	C	2	C/G	50.9/49.1	57/55	112	C	50.893	57	G	49.107	55	ACTTACACGTTTGTGCCTAC	ACAGTGCCGCCTTATGTTTT	ACTTACACGTTTGTGCCTAC	ACAGTGCCGCCTTATGTTTT	G	3172
1247_A10	csm2Δ	MMS	IV	291451	285064	SNP	1	T	2	T/C	55.0/45.0	55/45	100	T	55	55	C	45	45	AAGAAAACGAAAACGAAATT	CTTTGCCAAATCCAGAGAAG	AAGAAAACGAAAACGAAATT	CTTTGCCAAATCCAGAGAAG	C	68791
1247_A10	csm2Δ	MMS	IV	383451	377075	SNP	1	C	2	C/A	51.6/48.4	49/46	95	C	51.579	49	A	48.421	46	GATAACAGAAGTGGTTGGGT	AACTGAAGTAGCAACGTCAC	GATAACAGAAGTAGTTGGGT	AACTGAAGTAGCAACGTCAC	A	92000
1247_A10	csm2Δ	MMS	IV	411825	405048	SNP	1	A	2	A/T	51.4/48.6	57/54	111	A	51.351	57	T	48.649	54	CAAATATTGATAATATAAAG	TGTCTGCTGCTGCTGATAGA	CAAATATTGATAATATAAAG	TGTCTGCTGCTGCTGATAGA	T	28374
1247_A10	csm2Δ	MMS	IV	428473	421696	SNP	1	G	2	G/T	51.6/48.4	49/46	95	G	51.579	49	T	48.421	46	TTGAAGTTTTTGTAACCCTC	ACTTTGTAAAATAGATATTA	TTGAAGTTTTTGTAACCCTC	ACTTTGTAAAATAGATATTA	T	16648
1247_A10	csm2Δ	MMS	IV	430513	423736	SNP	1	G	2	G/A	53.0/47.0	53/47	100	G	53	53	A	47	47	CCATCATTGTGACAGATGAC	ATTTAGCAAAAACACTCGAG	CCATCATTGTGACAGATGAC	ATTTAGCAAAAACACTCGAG	A	2040
1247_A10	csm2Δ	MMS	IV	467714	460562	SNP	1	C	2	C/A	50.5/49.5	56/55	111	C	50.45	56	A	49.55	55	AGCTGAGGCAATTGGCTCCA	TCTGGCATCTTTCCCCTTCA	AGCTGAGGCAATTGGCTCCA	TCTGGCATCTTTCCCCTTCA	A	37201
1247_A10	csm2Δ	MMS	IV	473127	465975	SNP	1	G	2	A/G	51.4/48.6	55/52	107	A	51.402	55	G	48.598	52	AATAGATGTGAGGGAAAATC	TTTATAAACGGCCATGCTCA	AATAGATGTGAGGGAAAATC	TTTATAAACGGCCATGCTCA	A	5413
1247_A10	csm2Δ	MMS	IV	487280	480128	SNP	1	A	2	G/A	50.5/49.5	47/46	93	G	50.538	47	A	49.462	46	GTATTAGACATGATTAAGAA	CAAATGTTGCAAACAAGAAA	GTATTAGACATGATTAAGAA	CAAATGTTGCAAACAAGAAA	G	14153
1247_A10	csm2Δ	MMS	IV	501877	494725	SNP	1	G	2	A/G	53.8/46.2	56/48	104	A	53.846	56	G	46.154	48	TGGAACTAAACTGACAATGC	AAGCCTGATTTTTTTTTACC	TGGAACTAAACTGACAATGC	AAGCCTGATTTTTTTTTACC	A	14597
1247_A10	csm2Δ	MMS	IV	554810	539843	SNP	1	C	2	G/C	51.5/48.5	50/47	97	G	51.546	50	C	48.454	47	AGAAACGACGACGTGAGACA	GCGTTTCAAATTGCAAGATA	AGAAACGACGACGTGAGACA	GCGTTTCAAATTGCAAGATA	G	52933
1247_A10	csm2Δ	MMS	IV	554984	540017	SNP	1	A	2	A/G	51.3/48.7	58/55	113	A	51.327	58	G	48.673	55	GAATTAGAAGCCGCCAAGGA	AAACAAAGATTTGCTAAAGA	GAATTAGAAGCCGCCAAGGA	AAACAAAGATTTGCTAAAGA	G	174
1247_A10	csm2Δ	MMS	IV	563783	548816	SNP	1	A	2	G/A	52.6/47.4	51/46	97	G	52.577	51	A	47.423	46	AACTATATTTAACGCTACAA	TCTAACCTCATTCGCTGCTG	AACTATATTTAACGCTACAA	TCTAACCTCATTCGCTGCTG	G	8799
1247_A10	csm2Δ	MMS	IV	591561	576593	SNP	1	T	2	T/A	50.7/49.3	34/33	67	T	50.746	34	A	49.254	33	GAATGTATTATATAAAAATG	TGTGGCCGGAGGTCTGCATT	GAATGTATTATATAAAAATG	TGTGGCCGGAGGTCTGCATT	A	27778
1247_A10	csm2Δ	MMS	IV	594997	580029	SNP	1	C	2	C/A	54.2/45.8	58/49	107	C	54.206	58	A	45.794	49	AAACTTTCTTGGCCATGTAT	CAGAATGGCGAGATCAAGTG	AAACTTTCTTGGCCATGTAT	CAGAATGGCGAGATCAAGTG	A	3436
1247_A10	csm2Δ	MMS	IV	681400	660824	SNP	1	G	2	T/G	53.3/46.7	49/43	92	T	53.261	49	G	46.739	43	CATGGGTATGCAACCTTTTT	TGGGTGACACCTCCTTCCCT	CATGGGTATGCAACCTTTTT	TGGGTGACACCTCCTTCCCT	T	86403
1247_A10	csm2Δ	MMS	IV	701339	680764	SNP	1	A	2	G/A	52.1/47.9	50/46	96	G	52.083	50	A	47.917	46	TGAGGAGCGCAAAAGCAAAA	GGGGGATAGCATACATTAAC	TGAGGAGCGCAAAAGCAAAA	GGGGGATAGCATACATTAAC	G	19939
1247_A10	csm2Δ	MMS	IV	738825	718250	SNP	1	G	2	G/C	51.0/49.0	53/51	104	G	50.962	53	C	49.038	51	CTTAAACCTTCTAAAAGGGC	CTTAATCCATATTTTGTAAA	CTTAAACCTTCTAAAAGGGC	CTTAATCCATATTTTGTAAA	C	37486
1247_A10	csm2Δ	MMS	IV	834793	814219	SNP	1	T	2	C/T	54.0/46.0	54/46	100	C	54	54	T	46	46	ATTGCTCTGGTTTGAGCCGG	GAATTTCTCGTTCAACTTGG	ATTGCTCTGGTTTGAGCCGG	GAATTTCTCGTTCAACTTGG	C	95968
1247_A10	csm2Δ	MMS	IV	840866	820292	SNP	1	T	2	T/A	51.0/49.0	50/48	98	T	51.02	50	A	48.98	48	TAATGGTACGGATCTCGTCC	TGTCATATGGTAATGTACGA	TAATGGTACGGATCTCGTCC	TGTCATATGGTAATGTACGA	A	6073
1247_A10	csm2Δ	MMS	IV	868379	847805	SNP	1	T	2	T/G	51.4/47.7	56/52	109	T	51.376	56	G	47.706	52	AATTCGAATTCGAATCCGGA	TCGAACCATCGAATAAAAAA	AATTCGAATTCGAATCCGGA	TCGAACCATCGAATAAAAAA	G	27513
1247_A10	csm2Δ	MMS	IV	871886	851312	SNP	1	C	2	G/C	51.6/48.4	48/45	93	G	51.613	48	C	48.387	45	TACTAGTATATTATCATATA	GGTGTTAGAAGATGACGCAA	TACTAGTATATTATCATATA	GGTGTTAGAAGATGACGCAA	G	3507
1247_A10	csm2Δ	MMS	IV	875845	854953	SNP	1	A	2	T/A	51.5/48.5	17/16	33	T	51.515	17	A	48.485	16	AATCGATCAAACCAGTTCGA	CGACCTTAAGATATGATGAA	AATCGATCAAACCAGTTCGA	CGACCTTAAGATATGATGAA	T	3959
1247_A10	csm2Δ	MMS	IV	896125	873715	SNP	1	T	2	C/T	52.6/47.4	60/54	114	C	52.632	60	T	47.368	54	TAATGATCATTTGTTTTCAG	ATCTGAAAGTGATGAAACTT	TAATGATCATTTGTTTTCAG	ATCTGAAAGTGATGAAACTT	C	20280
1247_A10	csm2Δ	MMS	IV	900039	877629	SNP	1	T	2	T/A	53.1/46.9	60/53	113	T	53.097	60	A	46.903	53	TTGTGTATAAAATGAAAAAA	ATTGTTGGATTTAATGATTC	TTGTGTATAAAATGAAAAAA	ATTGTTGGATTTAATGATTC	A	3914
1247_A10	csm2Δ	MMS	IV	963468	941058	SNP	1	A	2	A/T	50.0/50.0	49/49	98	A	50	49	T	50	49	AAGTTATCAGCAGCAAACAA	GTTGGTGGTACCAGAAGGAA	AAGTTATCAGCAGCAAACAA	GTTGGTGGTACCAGAAGGAA	T	63429
1247_A10	csm2Δ	MMS	IV	996146	969810	SNP	1	C	2	C/A	52.0/48.0	53/49	102	C	51.961	53	A	48.039	49	GAAGGAGGATACAAAATTCG	CTCCACAAAGGCGCATTTAT	GAAGGAGGATACAAAATTCG	CTCCACAAAGGCGCATTTAT	A	32678
1247_A10	csm2Δ	MMS	IV	1000201	973865	SNP	1	G	2	A/G	50.5/49.5	46/45	91	A	50.549	46	G	49.451	45	TCAAATTATCGTGCACGTTA	TATCTTGTGTGCTTGACTTT	TCAAATTATCGTGCACGTTA	TATCTTGTGTGCTTGACTTT	A	4055
1247_A10	csm2Δ	MMS	IV	1003338	977002	SNP	1	A	2	G/A	54.5/45.5	60/50	110	G	54.545	60	A	45.455	50	CGAATCGCCTTTTTATGAGC	GTCTCATCTAGCACATCAAT	CGAATCGCCTTTTTATGAGC	GTCTCATCTAGCACATCAAT	G	3137
1247_A10	csm2Δ	MMS	IV	1075497	1049161	SNP	1	G	2	C/G	50.0/50.0	50/50	100	C	50	50	G	50	50	CAACCGAGGATCGAACTCGG	ACCTTTGCCGTGTGAAGGCA	CAACCGAGGATCGAACTCGG	ACCTTTGCCGTGTGAAGGCA	C	72159
1247_A10	csm2Δ	MMS	IV	1101341	1070097	SNP	1	C	2	G/C	55.0/45.0	2018-11-09	20	G	55	11	C	45	9	TGGATTCATTAGATCTATTA	ATTATGGGTGGTATGTTGGA	TGGATTCATTAGATCTATTA	ATTATGGGTGGTATGTTGGA	G	25844
1247_A10	csm2Δ	MMS	IV	1130698	1099454	SNP	1	A	2	A/T	51.8/48.2	43/40	83	A	51.807	43	T	48.193	40	TGGATGTTGATATAGATTCC	ACGAATGTTTCTTCACCTCC	TGGATGTTGATATAGATTCC	ACGAATGTTTCTTCACCTCC	T	29357
1247_A10	csm2Δ	MMS	IV	1131132	1099888	SNP	1	T	2	T/A	52.3/47.7	45/41	86	T	52.326	45	A	47.674	41	CAAGATGCTATAGATGCATG	GTGAATTCTATTCGACAGGG	CAAGATGCTATAGATGCATG	GTGAATTCTATTCGACAGGG	A	434
1247_A10	csm2Δ	MMS	IV	1156173	1124176	SNP	1	T	2	C/T	52.2/47.8	48/44	92	C	52.174	48	T	47.826	44	TGCCAATAAGTTACAGGGGA	CTCGAAAGATGGTGGGGATT	TGCCAATAAGTTACAGGGGA	CTCGAAAGATGGTGGGGATT	C	25041
1247_A10	csm2Δ	MMS	IV	1269222	1231089	SNP	1	C	2	T/C	52.3/47.7	46/42	88	T	52.273	46	C	47.727	42	GTTGAATATAACGAAGAACT	GATGATGCCGGCCTTATAGA	GTTGAATATAACGAAGAACT	GATGATGCCGGCCTTATAGA	T	113049
1247_A10	csm2Δ	MMS	IV	1272188	1234055	SNP	1	A	2	A/G	54.4/45.6	49/41	90	A	54.444	49	G	45.556	41	TTTCACTAAAAGTTGTCGCG	TTGTATACATATATGCGTAT	TTTCACTAAAAGTTGTCGCG	TTGTATACATATATGCGTAT	G	2966
1247_A10	csm2Δ	MMS	IV	1281035	1242902	SNP	1	A	2	A/T	54.5/45.5	55/46	101	A	54.455	55	T	45.545	46	CTTGTATCATCCAAGCGCTG	CGCATTTGCGTCTGTTTTGT	CTTGTATCATCCAAGCGCTG	CGCATTTGCGTCTGTTTTGT	T	8847
1247_A10	csm2Δ	MMS	IV	1301803	1263670	SNP	1	A	2	A/T	50.0/50.0	44/44	88	A	50	44	T	50	44	CAAAGTTACTGTCCAATTGA	AATCCAAAACAGACAAGCTG	CAAAGTTACTGTCCAATTGA	AATCCAAAACAGACAAGCTG	T	20768
1247_A10	csm2Δ	MMS	IV	1350922	1312769	SNP	1	T	2	C/T	53.2/46.8	58/51	109	C	53.211	58	T	46.789	51	ATATTTTCTAATATCGGGTG	GATATGCTATATATGAAAGA	ATATTTTCTAATATCGGGTG	GATATGCTATATATGAAAGA	C	49119
1247_A10	csm2Δ	MMS	V	119099	119097	SNP	1	G	2	G/T	52.3/47.7	56/51	107	G	52.336	56	T	47.664	51	GTCTGTAGGGAATGAAATAC	CGCAATATCCATAGTATTTG	GTCTGTAGGGAATGAAATAC	CGCAATATCCATAGTATTTG	T
1247_A10	csm2Δ	MMS	V	167046	167044	SNP	1	A	2	A/T	53.9/46.1	55/47	102	A	53.922	55	T	46.078	47	TAAGAGTAAGGTAACTATGA	TTTAGTGGAAAATGACCATA	TAAGAGTAAGGTAACTATGA	TTTAGTGGAAAATGACCATA	T	47947
1247_A10	csm2Δ	MMS	V	192437	192435	SNP	1	T	2	A/T	50.5/49.5	47/46	93	A	50.538	47	T	49.462	46	GTTGCTGCAGAGCGGTGCGC	GGGTGGCAAGCCGTTGCAGT	GTTGCTGCAGAGCGGTGCGC	GGGTGGCAAGCCGTTGCAGT	A	25391
1247_A10	csm2Δ	MMS	V	202740	202730	SNP	1	T	2	T/A	53.8/46.3	43/37	80	T	53.75	43	A	46.25	37	TTGTTCGGTACTACTCGTAG	CCTGTTTTTCAGCGCGGTGA	TTGTTCGGTACTACTCGTAG	CCTGTTTTTCAGCGCGGTGA	A	10303
1247_A10	csm2Δ	MMS	V	298860	298849	SNP	1	C	2	C/A	53.6/46.4	59/51	110	C	53.636	59	A	46.364	51	TTGTTGGAAAATTACTCTAC	ATAATTGAAGCATATCTCAT	TTGTTGGAAAATTACTCTAC	ATAATTGAAGCATATCTCAT	A	96120
1247_A10	csm2Δ	MMS	V	340511	340500	SNP	1	C	2	T/C	53.5/46.5	53/46	99	T	53.535	53	C	46.465	46	CTTAGAAGTGATGGATTGAG	GTAAACAGATTCCTTGACGG	CTTAGAAGTGATGGATTGAG	GTAAACAGATTCCTTGACGG	T	41651	Complex
1247_A10	csm2Δ	MMS	V	340512	340501	SNP	1	G	2	G/C	55.0/45.0	55/45	100	G	55	55	C	45	45	TTAGAAGTGATGGATTGAGC	TAAACAGATTCCTTGACGGA	TTAGAAGTGATGGATTGAGT	TAAACAGATTCCTTGACGGA	C	1	Complex
1247_A10	csm2Δ	MMS	V	428511	428456	SNP	1	T	2	A/T	52.3/47.7	46/42	88	A	52.273	46	T	47.727	42	CTTGGTAGTTTTTGAGGCTG	ATGAGGTGAAAAACTTATGA	CTTGGTAGTTTTTGAGGCTG	ATGAGGTGAAAAACTTATGA	A	87999
1247_A10	csm2Δ	MMS	V	443223	443168	SNP	1	C	2	G/C	52.9/47.1	64/57	121	G	52.893	64	C	47.107	57	GGTCTCTAGCGGGATCGAAC	GCTGATCCCCGCGTTATTAG	GGTCTCTAGCGGGATCGAAC	GCTGATCCCCGCGTTATTAG	G	14712
1247_A10	csm2Δ	MMS	V	490631	485673	SNP	1	G	2	G/A	51.5/48.5	51/48	99	G	51.515	51	A	48.485	48	CGGTGGTGGCTATGTGTTTA	CCTGGTAAAATGAATCCTAT	CGGTGGTGGCTATGTGTTTA	CCTGGTAAAATGAATCCTAT	A	47408
1247_A10	csm2Δ	MMS	V	510233	501678	SNP	1	G	2	G/T	53.6/46.4	37/32	69	G	53.623	37	T	46.377	32	TTGTATTTTTAGGACAGTGA	CTACGAAGTAACATTTTTAC	TTGTATTTTTAGGACAGTGA	CTACGAAGTAACATTTTTAC	T	19602
1247_A10	csm2Δ	MMS	V	547911	539356	SNP	1	C	2	A/C	52.6/47.4	61/55	116	A	52.586	61	C	47.414	55	GACAAGTCCGCTAGAAAATA	GTTGACGAACAAGTTGAATT	GACAAGTCCGCTAGAAAATA	GTTGACGAACAAGTTGAATT	A	37678
1247_A10	csm2Δ	MMS	V	566743	558188	SNP	1	A	2	G/A	50.8/49.2	66/64	130	G	50.769	66	A	49.231	64	TAGTTTATATGTCATAATGT	GTAAGTTTATTGGACCCTTC	TAGTTTATATGTCATAATGT	GTAAGTTTATTGGACCCTTC	G	18832
1247_A10	csm2Δ	MMS	VI	12127	11746	SNP	1	T	2	T/G	51.9/48.1	69/64	133	T	51.88	69	G	48.12	64	GCTATCGTTGAAGCCACGAC	CACTACGATAACCCAGCAAA	GCTATCGTTGAAGCCACGAC	CACTACGATAACCCAGCAAA	G
1247_A10	csm2Δ	MMS	VI	14671	14290	SNP	1	C	2	T/C	53.7/46.3	65/56	121	T	53.719	65	C	46.281	56	GAACGAATACCCTCTCCATT	TTCCTCCGTTCCTCCATTGC	GAACGAATACCCTCTCCATT	TTCCTCCGTTCCTCCATTGC	T	2544
1247_A10	csm2Δ	MMS	VI	27116	26735	SNP	1	T	2	T/A	54.2/45.8	65/55	120	T	54.167	65	A	45.833	55	TCACTAGTACCGTCTATATC	CTTGAGCGCCAATATGCGAA	TCACTAGTACCGTCTATATC	CTTGAGCGCCAATATGCGAA	A	12445
1247_A10	csm2Δ	MMS	VI	57419	57038	SNP	1	G	2	G/T	51.7/48.3	61/57	118	G	51.695	61	T	48.305	57	CTGTCGCTCCTCAAGGTTTG	ACATGGCTGCTACTTTCATT	CTGTCGCTCCTCAAGGTTTG	ACATGGCTGCTACTTTCATT	T	30303
1247_A10	csm2Δ	MMS	VI	62979	62598	SNP	1	G	2	A/G	53.5/46.5	53/46	99	A	53.535	53	G	46.465	46	TAAGTGTCTAAAATAGGAGT	ACCCATGGTAACTAATAATA	TAAGTGTCTAAAATAGGAGT	ACCCATGGTAACTAATAATA	A	5560
1247_A10	csm2Δ	MMS	VI	101354	100977	SNP	1	C	2	C/A	52.7/47.3	59/53	112	C	52.679	59	A	47.321	53	ATATAAATATTTCTGTTTTT	TTATTAACGCAACAATAATT	ATATAAATATTTCTGTTTTT	TTATTAACGCAACAATAATT	A	38375
1247_A10	csm2Δ	MMS	VI	111819	111442	SNP	1	G	2	G/A	53.5/46.5	54/47	101	G	53.465	54	A	46.535	47	GTAGAAAAGGAAGGAAAGAA	TCTAATCGCTGTATTATCGA	GTAGAAAAGGAAGGAAAGAA	TCTAATCGCTGTATTATCGA	A	10465
1247_A10	csm2Δ	MMS	VI	111911	111534	SNP	1	A	2	G/A	50.5/49.5	55/54	109	G	50.459	55	A	49.541	54	GAGCGGATGTATTTTTTAAC	AAGTATTCAGAATTGTTTTT	GAGCGGATGTATTTTTTAAC	AAGTATTCAGAATTGTTTTT	G	92
1247_A10	csm2Δ	MMS	VI	136823	136446	SNP	1	A	2	T/A	51.4/48.6	55/52	107	T	51.402	55	A	48.598	52	GCGTACTTATGTCTCTTGGC	CTTCGTATATGCAACAAAGA	GCGTACTTATGTCTCTTGGC	CTTCGTATATGCAACAAAGA	T	24912
1247_A10	csm2Δ	MMS	VI	155665	150438	SNP	1	C	2	T/C	54.3/45.7	63/53	116	T	54.31	63	C	45.69	53	AAGCAGGACTCTTTTCATGT	TCCCCTGATAATAATGTCCA	AAGCAGGACTCTTTTCATGT	TCCCCTGATAATAATGTCCA	T	18842
1247_A10	csm2Δ	MMS	VI	158328	153101	SNP	1	G	2	A/G	51.1/48.9	71/68	139	A	51.079	71	G	48.921	68	TCCACCTATTTGAGAAATAG	TAATTATTATATGAGTTATT	TCCACCTATTTGAGAAATAG	TAATTATTATATGAGTTATT	A	2663
1247_A10	csm2Δ	MMS	VI	186275	181048	SNP	1	G	2	C/G	52.1/47.9	38/35	73	C	52.055	38	G	47.945	35	ATAATAATAATAATAACAGT	CCAGCGGTATTGCTGACAAC	ATAATAATAATAATAACAGT	CCAGCGGTATTGCTGACAAC	C	27947
1247_A10	csm2Δ	MMS	VI	198416	193188	SNP	1	G	2	C/G	50.4/49.6	58/57	115	C	50.435	58	G	49.565	57	GGGCTACCACCGTCTGCCTC	TCTGCTGCCGCTTCCAGATC	GGGCTACCACCGTCTGCCTC	TCTGCTGCCGCTTCCAGATC	C	12141
1247_A10	csm2Δ	MMS	VI	247969	242744	SNP	1	C	2	A/C	51.2/48.8	66/63	129	A	51.163	66	C	48.837	63	CAAGTATTAAATGATCGTTG	AAAGTTTTCTTGGAATTCTT	CAAGTATTAAATGATCGTTG	AAAGTTTTCTTGGAATTCTT	A	49553
1247_A10	csm2Δ	MMS	VII	74767	68299	SNP	1	A	2	T/A	50.4/49.6	61/60	121	T	50.413	61	A	49.587	60	TGACCGAGCACATGGGACGT	CGAATAAAAGATTTTCTCAG	TGACCGAGCACATGGGACGT	CGAATAAAAGATTTTCTCAG	T
1247_A10	csm2Δ	MMS	VII	117132	110664	SNP	1	G	2	C/G	51.2/48.8	44/42	86	C	51.163	44	G	48.837	42	TGGGGTCAAAAGGGTTACTT	GACTGGTTGCTTGGCCTGCG	TGGGGTCAAAAGGGTTACTT	GACTGGTTGCTTGGCCTGCG	C	42365
1247_A10	csm2Δ	MMS	VII	133211	126743	SNP	1	T	2	T/G	50.8/49.2	63/61	124	T	50.806	63	G	49.194	61	CTGCATTATCAACAGAGCTA	CCATCGAAAACCGTATTCAT	CTGCATTATCAACAGAGCTA	CCATCGAAAACCGTATTCAT	G	16079
1247_A10	csm2Δ	MMS	VII	136566	130098	SNP	1	A	2	A/T	54.7/45.3	52/43	95	A	54.737	52	T	45.263	43	TAGTGGCTTGGGCTTGACCA	GTTGGATGAGATGTTACCAA	TAGTGGCTTGGGCTTGACCA	GTTGGATGAGATGTTACCAA	T	3355
1247_A10	csm2Δ	MMS	VII	245322	238854	SNP	1	C	2	A/C	53.1/46.9	34/30	64	A	53.125	34	C	46.875	30	TTTCCCTAGCAGCGGCCCAT	GCTTTAGCTTCAAATAGTTG	TTTCCCTAGCAGCGGCCCAT	GCTTTAGCTTCAAATAGTTG	A	108756
1247_A10	csm2Δ	MMS	VII	273306	266840	SNP	1	A	2	G/A	54.3/45.7	57/48	105	G	54.286	57	A	45.714	48	GTGATATCGGAACTAACTTG	TCGTGGAAATGTGTCAAAAA	GTGATATCGGAACTAACTTG	TCGTGGAAATGTGTCAAAAA	G	27984
1247_A10	csm2Δ	MMS	VII	276141	269675	SNP	1	T	2	G/T	53.3/46.7	48/42	90	G	53.333	48	T	46.667	42	GTGCATGCAATAGATCGGTT	ACCCGCTGACGTGAATATGA	GTGCATGCAATAGATCGGTT	ACCCGCTGACGTGAATATGA	G	2835
1247_A10	csm2Δ	MMS	VII	347554	341070	SNP	1	C	2	C/A	52.8/47.2	57/51	108	C	52.778	57	A	47.222	51	ACAAATGCATAGAGGAATTG	GAACAACCCTCCAAAACAAA	ACAAATGCATAGAGGAATTG	GAACAACCCTCCAAAACAAA	A	71413
1247_A10	csm2Δ	MMS	VII	373196	366712	SNP	1	A	2	A/G	50.5/49.5	49/48	97	A	50.515	49	G	49.485	48	TCGCAACACTCATCTACAGC	TTTTCAGGATATATTGATGA	TCGCAACACTCATCTACAGC	TTTTCAGGATATATTGATGA	G	25642
1247_A10	csm2Δ	MMS	VII	423205	416721	SNP	1	A	2	A/C	54.5/45.5	61/51	112	A	54.464	61	C	45.536	51	GTTCGAATCTCTTAGCAACC	TTATTTTTTTCCATTTAAAA	GTTCGAATCTCTTAGCAACC	TTATTTTTTTCCATTTAAAA	C	50009
1247_A10	csm2Δ	MMS	VII	442969	436485	SNP	1	G	2	T/G	54.6/45.4	53/44	97	T	54.639	53	G	45.361	44	TAATAATAAGTCGATAAACA	TACAGAGAATAGAATAGATT	TAATAATAAGTCGATAAACA	TACAGAGAATAGAATAGATT	T	19764
1247_A10	csm2Δ	MMS	VII	447957	441473	SNP	1	A	2	T/A	51.3/48.7	59/56	115	T	51.304	59	A	48.696	56	CTAGAGATGAGTTCATCCAA	TCACTGGCCACAGAACTTTG	CTAGAGATGAGTTCATCCAA	TCACTGGCCACAGAACTTTG	T	4988
1247_A10	csm2Δ	MMS	VII	494367	487883	SNP	1	C	2	T/C	51.8/48.2	58/54	112	T	51.786	58	C	48.214	54	ACGTCGTGGAATTAGAAACT	GTTCTTCGGGTAAGAAACCA	ACGTCGTGGAATTAGAAACT	GTTCTTCGGGTAAGAAACCA	T	46410
1247_A10	csm2Δ	MMS	VII	528798	522314	SNP	1	G	2	C/G	54.4/45.6	49/41	90	C	54.444	49	G	45.556	41	GGGGGATCTGGAAGTACAAT	ATGTGCTCTCCCCCTCTCAA	GGGGGATCTGGAAGTACAAT	ATGTGCTCTCCCCCTCTCAA	C	34431
1247_A10	csm2Δ	MMS	VII	541780	532381	SNP	1	A	2	C/A	54.6/45.4	53/44	97	C	54.639	53	A	45.361	44	GACATTGAAATTTTATTCTA	TAAATGCATCAGCTCTTTAA	GACATTGAAATTTTATTCTA	TAAATGCATCAGCTCTTTAA	C	12982
1247_A10	csm2Δ	MMS	VII	661247	645525	SNP	1	C	2	T/C	51.2/48.8	44/42	86	T	51.163	44	C	48.837	42	TAGTTGAAACTGTTATTATC	GCCCCTCCAATTTTCTGTAA	TAGTTGAAACTGTTATTATC	GCCCCTCCAATTTTCTGTAA	T	119467
1247_A10	csm2Δ	MMS	VII	663180	647458	SNP	1	C	2	A/C	54.7/45.3	58/48	106	A	54.717	58	C	45.283	48	TAAGAATTAGTTGTTCCAAA	CAACGGGTGATTCTCTTTCT	TAAGAATTAGTTGTTCCAAA	CAACGGGTGATTCTCTTTCT	A	1933
1247_A10	csm2Δ	MMS	VII	684272	668553	SNP	1	A	2	A/G	53.8/46.2	49/42	91	A	53.846	49	G	46.154	42	ATCTAATGTGTCTAGTTTCA	ACTCTCCAAAAGTTCTTTCA	ATCTAATGTGTCTAGTTTCA	ACTCTCCAAAAGTTCTTTCA	G	21092
1247_A10	csm2Δ	MMS	VII	705037	689316	SNP	1	A	2	A/G	54.2/45.8	45/38	83	A	54.217	45	G	45.783	38	AAAATGGATATGATATTATG	CATTGCATGAGTGAAGGTGC	AAAATGGATATGATATTATG	CATTGCATGAGTGAAGGTGC	G	20765
1247_A10	csm2Δ	MMS	VII	740745	724198	SNP	1	C	2	C/T	54.6/45.4	53/44	97	C	54.639	53	T	45.361	44	ACAACAATGTTGACGAGAAG	AACTTGCAGGTATCGATGAC	ACAACAATGTTGACGAGAAG	AACTTGCAGGTATCGATGAC	T	35708
1247_A10	csm2Δ	MMS	VII	759186	742639	SNP	1	C	2	A/C	50.0/49.2	59/58	118	A	50	59	C	49.153	58	TAATATCCTTATGGAAAAAC	TCTCCTGTGTTATACTTTTA	TAATATCCTTATGGAAAAAC	TCTCCTGTGTTATACTTTTA	A	18441
1247_A10	csm2Δ	MMS	VII	1069720	1043799	SNP	1	A	2	G/A	53.1/46.9	76/67	143	G	53.147	76	A	46.853	67	AGACACATGCCTTTCAAAAT	GAAATAAAGGTTTTCGAACA	AGACACATGCCTTTCAAAAT	GAAATAAAGGTTTTCGAACA	G	310534
1247_A10	csm2Δ	MMS	VII	1073503	1047582	SNP	1	A	2	A/G	50.4/49.6	67/66	133	A	50.376	67	G	49.624	66	GATATGTTTTGAGATATTTC	TGAACCATATAGAATATGCA	GATATGTTTTGAGATATTTC	TGAACCATATAGAATATGCA	G	3783
1247_A10	csm2Δ	MMS	VIII	74527	74524	SNP	1	A	2	A/C	50.0/50.0	37/37	74	A	50	37	C	50	37	AACTGACTATTGGCCTGTCC	CTCTCGAGCATTATTGTCTG	AACTGACTATTGACCTGTCC	CTCTCGAGCATTATTGTCTG	C
1247_A10	csm2Δ	MMS	VIII	118306	112109	SNP	1	C	2	C/A	51.1/48.9	48/46	94	C	51.064	48	A	48.936	46	CTCTTTTCCCCTCTAATTTC	TTCCAATCACGCCCGTAAGT	CTCTTTTCCCCTCTAATTTC	TTCCAATCACGCCCGTAAGT	A	43779
1247_A10	csm2Δ	MMS	VIII	137274	131064	SNP	1	A	2	A/T	50.4/48.7	60/58	119	A	50.42	60	T	48.739	58	GTATCTCTATCATACAAATC	TCTTCCCATCGGGTATTCGC	GTATCTCTATCATACAAATC	TCTTCCCATCGGGTATTCGC	T	18968
1247_A10	csm2Δ	MMS	VIII	137642	131432	SNP	1	A	2	G/A	54.3/45.7	50/42	92	G	54.348	50	A	45.652	42	GTCGTGGCGTGTAAAGTTGA	CGCTCTTGATTCCAAGATAC	GTCGTGGCGTGTAAAGTTGA	CGCTCTTGATTCCAAGATAC	G	368
1247_A10	csm2Δ	MMS	VIII	150739	144528	SNP	1	C	2	A/C	52.9/47.1	46/41	87	A	52.874	46	C	47.126	41	GTCATGGCTTTTAAACAAAG	GTTAATCTTAATCCCTATAT	GTCACGGCTTTTAAACAAAG	GTTAATCTTAATCCCTATAT	A	13097
1247_A10	csm2Δ	MMS	VIII	161835	155625	SNP	1	A	2	A/C	50.7/49.3	37/36	73	A	50.685	37	C	49.315	36	TCTAGTTCTGCTCTTTCGCC	TGATTTAGTAAAACAGGAGT	TCTAGTTCTGCTCTTTCGCC	TGATTTAGTAAAACAGGAGT	C	11096
1247_A10	csm2Δ	MMS	VIII	164878	158668	SNP	1	G	2	A/G	50.9/49.1	57/55	112	A	50.893	57	G	49.107	55	TAAAACACATCATCTTCTAC	AACATTAATCTGTTATATTA	TAAAACACATCATCTTCTAC	AACATTAATCTGTTATATTA	A	3043
1247_A10	csm2Δ	MMS	VIII	189739	183529	SNP	1	C	2	C/G	54.5/45.5	42/35	77	C	54.545	42	G	45.455	35	AGCGGGAGTGGCTCTTTCCA	GAATATAACGCTATATACAT	AGCGGGAGTGGCTCTTTCCA	GAATATAACGCTATATACAT	G	24861
1247_A10	csm2Δ	MMS	VIII	209297	203087	SNP	1	C	2	C/T	54.7/45.3	64/53	117	C	54.701	64	T	45.299	53	ACTACGGGCAAAGAAGTACA	CTCTAATATAACAATTCTTT	ACTACGGGCAAAGAAGTACA	CTCTAATATAACAATTCTTT	T	19558
1247_A10	csm2Δ	MMS	VIII	243848	235791	SNP	1	C	2	C/T	50.0/50.0	52/52	104	C	50	52	T	50	52	CGGAGGGGCTAAATGGAACA	ATTCGTCATCTTCCGTCTTT	CGGAGGGGCTAAATGGAACA	ATTCGTCATCTTCCGTCTTT	T	34551
1247_A10	csm2Δ	MMS	VIII	302718	294661	SNP	1	C	2	A/C	51.4/48.6	54/51	105	A	51.429	54	C	48.571	51	TAAATTCAGAGAAGATCTAT	ACACGATATCTCCATAGTTA	TAAATTCAGAGAAGATCTAT	ACACGATATCTCCATAGTTA	A	58870
1247_A10	csm2Δ	MMS	VIII	323982	315925	SNP	1	C	2	C/T	52.2/47.8	59/54	113	C	52.212	59	T	47.788	54	GAATCAAGCCCGTGGCTTTG	AAATTGAACACCATCCTTAT	GAATCAAGCCCGTGGCTTTG	AAATTGAACACCATCCTTAT	T	21264
1247_A10	csm2Δ	MMS	VIII	358203	350146	SNP	1	A	2	A/G	50.5/49.5	49/48	97	A	50.515	49	G	49.485	48	TTCTTTCTCTATACTACCTA	CTCAGCAGAAAATTTTCACT	TTCTTTCTCTATACTACCTA	CTCAGCAGAAAATTTTCACT	G	34221
1247_A10	csm2Δ	MMS	VIII	402666	394610	SNP	1	C	2	C/T	50.0/49.0	51/50	102	C	50	51	T	49.02	50	CTTGTATTTTTTGTACATCC	AAAAGAATTCAGACATTTCT	CTTGTATTTTTTGTACATCC	AAAAGAATTCAGACATTTCT	T	44463
1247_A10	csm2Δ	MMS	VIII	468832	460776	SNP	1	A	2	T/A	54.9/45.1	50/41	91	T	54.945	50	A	45.055	41	CGAGTTTCCTTACACTTTAG	CGAGAGGTTAAAATTTGAGG	CGAGTTTCCTTACACTTTAG	CGAGAGGTTAAAATTTGAGG	T	66166
1247_A10	csm2Δ	MMS	VIII	479571	471513	SNP	1	T	2	T/C	51.6/48.4	47/44	91	T	51.648	47	C	48.352	44	AAGTGGTCGGGGGAGGGATG	CCATGCAATTGTGTCCGTTA	AAGTGGTCGGGGGAGGGATG	CCATGCAATTGTGTCCGTTA	C	10739
1247_A10	csm2Δ	MMS	VIII	484622	476564	SNP	1	G	2	C/G	51.7/48.3	60/56	116	C	51.724	60	G	48.276	56	CCATCTTCAACAACAATACC	ACTTACCATCCTATTTGCTT	CCATCTTCAACAACAATACC	ACTTACCATCCTATTTGCTT	C	5051
1247_A10	csm2Δ	MMS	VIII	501122	493064	SNP	1	C	2	C/A	53.4/46.6	62/54	116	C	53.448	62	A	46.552	54	GTGTGCCAAAAATTCAGGAA	CGTCTTTCTCAAAGGCGACA	GTGTGCCAAAAATTCAGGAA	CGTCTTTCTCAAAGGCGACA	A	16500
1247_A10	csm2Δ	MMS	IX	19304	3454	SNP	1	T	2	C/T	54.8/45.2	23/19	42	C	54.762	23	T	45.238	19	GTTCAAAGTATCAGTAGCAG	TCGACACACCCTATACTACT	GTTCAAAGTATCAGTAGCAG	TCGACACACCCTATACTACT	C
1247_A10	csm2Δ	MMS	IX	33731	17692	SNP	1	T	2	A/T	52.6/47.4	61/55	116	A	52.586	61	T	47.414	55	GCGGTATTCATTTCGTAAAC	TGACATCGTGTGACCTTTCA	GCGGTATTCATTTCGTAAAC	TGACATCGTGTGACCTTTCA	A	14427
1247_A10	csm2Δ	MMS	IX	133345	116773	SNP	1	A	2	T/A	50.5/49.5	49/48	97	T	50.515	49	A	49.485	48	GGAATTACAGGCGCAGATTA	AATATTACCAAAATTGGTTG	GGAATTACAGGCGCAGATTA	AATATTACCAAAATTGGTTG	T	99614
1247_A10	csm2Δ	MMS	IX	168063	151491	SNP	1	G	2	A/G	50.8/49.2	63/61	124	A	50.806	63	G	49.194	61	TGATGATGTACTGTTTTTCC	GGAATGTTCCGTCACAGTAC	TGATGATGTACTGTTTTTCC	GGAATGTTCCGTCACAGTAC	A	34718
1247_A10	csm2Δ	MMS	IX	198508	181936	SNP	1	C	2	C/T	54.5/45.5	48/40	88	C	54.545	48	T	45.455	40	CACCATAAGTGATCTCAATC	AGATGATGACATTGTTAACT	CACCATAAGTGATCTCAATC	AGATGATGACATTGTTAACT	T	30445
1247_A10	csm2Δ	MMS	IX	296904	280331	SNP	1	C	2	A/C	54.2/45.8	64/54	118	A	54.237	64	C	45.763	54	CTTGGATAAACAAACAGATC	GACACAGACATAATAAATGT	CTTGGATAAACAAACAGATC	GACACAGACATAATAAATGT	A	98396
1247_A10	csm2Δ	MMS	IX	314325	297752	SNP	1	T	2	A/T	52.9/47.1	55/49	104	A	52.885	55	T	47.115	49	TGTATATTTCCTCAATTCTC	GAAAGTGTCAGCATTAAGCT	TGTATATTTCCTCAATTCTC	GAAAGTGTCAGCATTAAGCT	A	17421
1247_A10	csm2Δ	MMS	IX	333626	317053	SNP	1	G	2	G/A	52.3/47.7	46/42	88	G	52.273	46	A	47.727	42	GTGGAGAGTATAAGCGTTTC	TCTCCTCTTCCTTTCTCTAC	GTGGAGAGTATAAGCGTTTC	TCTCCTCTTCCTTTCTCTAC	A	19301
1247_A10	csm2Δ	MMS	IX	366721	350148	SNP	1	G	2	G/A	50.5/49.5	50/49	99	G	50.505	50	A	49.495	49	TAGGTTCAACTAAATTGGAA	AACCAGCAATCTGTTGTGGC	TAGGTTCAACTAAATTGGAA	AACCAGCAATCTGTTGTGGC	A	33095
1247_A10	csm2Δ	MMS	IX	367425	350852	SNP	1	T	2	T/A	53.5/46.5	54/47	101	T	53.465	54	A	46.535	47	TCATTGAATAGGTTTGGAAG	TTGGCGATGATGGCATCAAA	TCATTGAATAGGTTTGGAAG	TTGGCGATGATGGCATCAAA	A	704
1247_A10	csm2Δ	MMS	X	30502	16479	SNP	1	A	2	T/A	52.9/47.1	54/48	102	T	52.941	54	A	47.059	48	ACCGTTTGTGTGCCGTGGTG	ACAGATAGAAGAGGGCACTG	ACCGTTTGTGTGCCGTGGTG	ACAGATAGAAGAGGGCACTG	T
1247_A10	csm2Δ	MMS	X	32221	18198	SNP	1	T	2	T/A	51.9/48.1	54/50	104	T	51.923	54	A	48.077	50	ATACACTTTGGAAGCCGCTC	GGCAAGAGGTTTCACAACAG	ATACACTTTGGAAGCCGCTC	GGCAAGAGGTTTCACAACAG	A	1719
1247_A10	csm2Δ	MMS	X	105959	91934	SNP	1	G	2	T/G	54.8/45.2	63/52	115	T	54.783	63	G	45.217	52	AGCTATACCACGAATATGAA	AGTCTATTGCCAAGGATTTG	AGCTATACCACGAATATGAA	AGTCTATTGCCAAGGATTTG	T	73738
1247_A10	csm2Δ	MMS	X	168859	154834	SNP	1	A	2	G/A	52.1/47.9	38/35	73	G	52.055	38	A	47.945	35	CAATATATTTAGTGATAACA	CAGGATAATCACGTGAAACT	CAATATATTTAGTGATAACA	CAGGATAATCACGTGAAACT	G	62900
1247_A10	csm2Δ	MMS	X	170035	156010	SNP	1	T	2	C/T	51.3/48.7	60/57	117	C	51.282	60	T	48.718	57	GCATTTTGACAACACAGTAG	CTAGAGAAGGTTCAAAACAA	GCATTTTGACAACACAGTAG	CTAGAGAAGGTTCAAAACAA	C	1176
1247_A10	csm2Δ	MMS	X	223342	209317	SNP	1	A	2	T/A	54.6/45.4	59/49	108	T	54.63	59	A	45.37	49	TTCTAATAATTTGTCATTTG	CTGACGAATCGTTAGGCACA	TTCTAATAATTTGTCATTTG	CTGACGAATCGTTAGGCACA	T	53307
1247_A10	csm2Δ	MMS	X	236607	222582	SNP	1	C	2	G/C	52.7/47.3	48/43	91	G	52.747	48	C	47.253	43	AGGGAGGCACAGAGCATGGC	AATTTGGCAAATTGCAGGTT	AGGGAGGCACAGAGCATGGC	AATTTGGCAAATTGCAGGTT	G	13265
1247_A10	csm2Δ	MMS	X	279249	265224	SNP	1	T	2	A/T	50.6/49.4	41/40	81	A	50.617	41	T	49.383	40	CAAATTCATTTAGTAACAGA	CATCCGGTGTCGGCAGCCGG	CAAATTCATTTAGTAACAGA	CATCCGGTGTCGGCAGCCGG	A	42642
1247_A10	csm2Δ	MMS	X	301750	287726	SNP	1	G	2	G/A	53.2/46.8	50/44	94	G	53.191	50	A	46.809	44	CCAATTGAAGTTTGTACATT	CTTCTTCCTTTGTGAGTTCT	CCAATTGAAGTTTGTACATT	CTTCTTCCTTTGTGAGTTCT	A	22501
1247_A10	csm2Δ	MMS	X	315608	301584	SNP	1	G	2	C/G	51.1/48.9	47/45	92	C	51.087	47	G	48.913	45	TCCTGACGCTATTCTCTCTT	TTTCTTCTGTTTTGTTTCTC	TCCTGACGCTATTCTCTCTT	TTTCTTCTGTTTTGTTTCTC	C	13858
1247_A10	csm2Δ	MMS	X	352160	338136	SNP	1	T	2	T/C	50.5/49.5	47/46	93	T	50.538	47	C	49.462	46	CAGTAAAAAAGATTGGTGGG	TTAATATCTTGAGGATTCCT	CAGTAAAAAAGATTGGTGGG	TTAATATCTTGAGGATTCCT	C	36552
1247_A10	csm2Δ	MMS	X	362487	348424	SNP	1	T	2	T/A	51.3/48.7	58/55	113	T	51.327	58	A	48.673	55	CTTTCTGCAAACGTCAATAA	CCAGACACCTCATCGACGTC	CTTTCTGCAAACGTCAATAA	CCAGACACTTCATCGACGTC	A	10327
1247_A10	csm2Δ	MMS	X	364354	350291	SNP	1	T	2	A/T	50.9/49.1	58/56	114	A	50.877	58	T	49.123	56	TTAAGGAAAAAATTTCATTA	ATGCTTTAAGAAATATTCAA	TTAAGGAAAAAATTTCATTA	ATGCTTTAAGAAATATTCAA	A	1867
1247_A10	csm2Δ	MMS	X	384067	369876	SNP	1	A	2	A/T	52.5/47.5	62/56	118	A	52.542	62	T	47.458	56	TCTATTCCCGTGTCCCTGCA	GGTCATGATGTATTGGCGGC	TCTATTCCCGTGTCCCTGCA	GGTCATGATGTATTGGCGGC	T	19713
1247_A10	csm2Δ	MMS	X	491126	471361	SNP	1	A	2	A/G	51.0/49.0	52/50	102	A	50.98	52	G	49.02	50	TAGACATCTCCATTGATAAA	AACCAATTGGTCGTATTGTC	TAGACATCTCCATTGATAAA	AACCAATTGGTCGTATTGTC	G	107059
1247_A10	csm2Δ	MMS	X	541359	521594	SNP	1	A	2	G/A	51.5/48.5	50/47	97	G	51.546	50	A	48.454	47	CATTTGCGTCATCTTCTAAC	CCGTATATGATAATATACTA	CATTTGCGTCATCTTCTAAC	CCGTATATGATAATATACTA	G	50233
1247_A10	csm2Δ	MMS	X	546391	526626	SNP	1	A	2	A/G	50.5/49.5	52/51	103	A	50.485	52	G	49.515	51	GCCAGATACTGCATTTGCAG	CACTCTGAATACGAATAAGG	GCCAGATACTGCATTTGCAG	CACTCTGAATACGAATAAGG	G	5032
1247_A10	csm2Δ	MMS	X	617127	597361	SNP	1	G	2	A/G	53.3/46.7	56/49	105	A	53.333	56	G	46.667	49	AAGTATCGTAGTAGCTATAG	ATCATGTACTTTTATTATCC	AAGTATCGTAGTAGCTATAG	ATCATGTACTTTTATTATCC	A	70736
1247_A10	csm2Δ	MMS	X	617961	598195	SNP	1	T	2	A/T	49.4/49.4	39/39	79	A	49.367	39	T	49.367	39	AGGCGTCAGATTTAGGTGGA	TTAACCTCTAAAATCTCTGA	AGGCGTCAGATTTAGGTGGA	TTAACCTCTAAAATCTCTGA	A	834
1247_A10	csm2Δ	MMS	X	619474	599708	SNP	1	T	2	C/T	50.4/49.6	64/63	127	C	50.394	64	T	49.606	63	TAAGCATTTGCCTTCTTTGG	CATTTGCGACCAAATTTCAT	TAAGCATTTGCCTTCTTTGG	CATTTGCGACCAAATTTCAT	C	1513
1247_A10	csm2Δ	MMS	X	632021	612255	SNP	1	T	2	C/T	51.0/49.0	49/47	96	C	51.042	49	T	48.958	47	CTATAGTCTAGCCCATCAGG	TGCAAAGCGTATTGGACATT	CTATAGTCTAGCCCATCAGG	TGCAAAGCGTATTGGACATT	C	12547
1247_A10	csm2Δ	MMS	X	691528	671759	SNP	1	C	2	A/C	54.7/45.3	52/43	95	A	54.737	52	C	45.263	43	TATCAACAGATAGTAAATGG	GAAGTAGTCTTATGATTTTG	TATCAACAGATAGTAAATGG	GAAGTAGTCTTATGATTTTG	A	59507
1247_A10	csm2Δ	MMS	X	705643	685874	SNP	1	G	2	G/C	51.1/48.9	48/46	94	G	51.064	48	C	48.936	46	AGATATTCGACTATTTCCTG	GAAAAAATTCATTCCTTTGA	AGATATTCGACTATTTCCTG	GAAAAAATTCATTCCTTTGA	C	14115
1247_A10	csm2Δ	MMS	XI	34139	34140	SNP	1	C	2	C/A	53.0/47.0	62/55	117	C	52.991	62	A	47.009	55	GCTGCTCTACACCTTACTAT	ACACATGAATATATATATAT	GCTGCTCTACACCTTACTAT	ACACATGAATATATATATAT	A
1247_A10	csm2Δ	MMS	XI	127208	127212	SNP	1	G	2	A/G	52.8/47.2	56/50	106	A	52.83	56	G	47.17	50	AATAAAGGGAAAGACCTTAT	TTTTTGCCCAAAAACCCTAG	AATAAAGGAATAGACCTTAT	TTTTTGCCCAAAAACCCTAG	A	93069
1247_A10	csm2Δ	MMS	XI	156092	156096	SNP	1	A	2	A/G	51.1/48.9	47/45	92	A	51.087	47	G	48.913	45	AAGGGCCTTCCCATGTTTTG	TGAGCCTAACTTGAAAGCCT	AAGGGCCTTCCCATGTTTTG	TGAGCCTAACTTGAAAGCCT	G	28884
1247_A10	csm2Δ	MMS	XI	169680	169690	SNP	1	C	2	C/A	51.0/49.0	52/50	102	C	50.98	52	A	49.02	50	ATCCAAGTTTGCGATGGATT	TTTACCCAAATCAGAAGGTA	ATCCAAGTTTGCGATGGATT	TTTACCCAAATCAGAAGGTA	A	13588
1247_A10	csm2Δ	MMS	XI	240617	240629	SNP	1	A	2	G/A	54.4/45.6	49/41	90	G	54.444	49	A	45.556	41	ATATATCTTGTTCTATTTGA	CCGGATCTCTCATTATCACG	ATATATCTTGTTCTATTTGA	CCGGATCTCTCATTATCACG	G	70937
1247_A10	csm2Δ	MMS	XI	304344	304355	SNP	1	A	2	T/A	53.3/46.7	64/56	120	T	53.333	64	A	46.667	56	CTGTTTCTTTAACCTGGTAA	AAAAAGTACAAACACTTAAG	CTGTTTCTTTAACCTGGTAA	AAAAAGTACAAACACTTAAG	T	63727
1247_A10	csm2Δ	MMS	XI	308179	308190	SNP	1	G	2	A/G	50.5/49.5	52/51	103	A	50.485	52	G	49.515	51	TCGAACTGGGGACGTTCTGC	TGTTAAGCAGATGCCATAAC	TCGAACTGGGGACGTTCTGC	TGTTAAGCAGATGCCATAAC	A	3835
1247_A10	csm2Δ	MMS	XI	326840	326851	SNP	1	G	2	G/A	52.4/47.6	43/39	82	G	52.439	43	A	47.561	39	AAAGCAGCAGCAATGGAGAA	TTTGGAGAGATTGGGTGCAA	AAAGCAGCAGCAATGGAGAA	TTTGGAGAGATTGGGTGCAA	A	18661
1247_A10	csm2Δ	MMS	XI	365081	365092	SNP	1	G	2	G/C	52.8/47.2	56/50	106	G	52.83	56	C	47.17	50	TGGCAAGTCATGTAGCATGT	CGCTAACATCGTTTATCGTT	TGGCAAGTCATGTAGCATGT	CGCTAACATCGTTTATCGTT	C	38241
1247_A10	csm2Δ	MMS	XI	371430	371441	SNP	1	G	2	A/G	50.7/49.3	38/37	75	A	50.667	38	G	49.333	37	TTTTTTACTTTCAATTCTCC	TTAGGTTATTTATTCTACTA	TTTTTTACTTTCAATTCTCC	TTAGGTTATTTATTCTACTA	A	6349
1247_A10	csm2Δ	MMS	XI	456475	456475	SNP	1	C	2	T/C	51.0/49.0	49/47	96	T	51.042	49	C	48.958	47	ACGTGATCTAGCCAATGGCG	AATTGAATTAACATTAATGT	ACGTGATCTAGCCAATGGCG	AATTGAATTAACATTAATGT	T	85045
1247_A10	csm2Δ	MMS	XI	470457	470460	SNP	1	C	2	C/A	52.6/47.4	60/54	114	C	52.632	60	A	47.368	54	AACTTGACCAAGCAAAAGGA	AAAGAACTAGAAGAAAAATT	AACTTGACCAAGCAAAAGGA	AAAGAACTAGAAGAAAAATT	A	13982
1247_A10	csm2Δ	MMS	XI	494613	494602	SNP	1	G	2	A/G	51.3/48.7	60/57	117	A	51.282	60	G	48.718	57	AAGCTACTAATATTCTTGAA	TATCCTGATGTTTTATCAAA	AAGCTACTAATATTCTTGAA	TATCCTGAAGTTTTATCAAA	A	24156
1247_A10	csm2Δ	MMS	XI	547727	547516	SNP	1	C	2	C/A	53.7/46.3	51/44	95	C	53.684	51	A	46.316	44	TATTGTTCTATCCAGCTCTT	AAAAAGGAAGACAAACAACG	TATTGTTCTATCCAGCTCTT	AAAAAGGAAGACAAACAACG	A	53114
1247_A10	csm2Δ	MMS	XI	549904	549693	SNP	1	G	2	A/G	52.1/47.9	62/57	119	A	52.101	62	G	47.899	57	ATGTTACTTCAATTCTAAAT	ATAAGTCCTCAACAGATGGA	ATGTTACTTCAATTCTAAAT	ATAAGTCCTCAACAGATGGA	A	2177
1247_A10	csm2Δ	MMS	XI	552086	551874	SNP	1	C	2	C/T	53.5/46.5	53/46	99	C	53.535	53	T	46.465	46	GCATCTGTTCAAATCAACGT	GCTAAGGTTGATGAAGAAGG	GCATCTGTTCAAATCAACGT	GCTAAGGTTGATGAAGAAGG	T	2182
1247_A10	csm2Δ	MMS	XI	559078	558863	SNP	1	A	2	G/A	50.7/49.3	68/66	134	G	50.746	68	A	49.254	66	TAACCGAAAATATCAGAAGC	ACCTCTAACGGCGATGGTTT	TAACCGAAAATATCAGAAGC	ACCTCTAACGGCGATGGTTT	G	6992
1247_A10	csm2Δ	MMS	XI	611042	610829	SNP	1	A	2	A/G	50.9/49.1	59/57	116	A	50.862	59	G	49.138	57	AATACTCTCTCTAAAAGGAG	ACGAGGCTCATCAACTTCAA	AATACTCTCTCTAAAAGGAG	ACGAGGCTCATCAACTTCAA	G	51964
1247_A10	csm2Δ	MMS	XII	18815	11859	SNP	1	C	2	C/G	50.8/49.2	66/64	130	C	50.769	66	G	49.231	64	TGTTTTAACCAGCACTGAAG	AAGGAGTGTTTCCTCAGTCT	TGTTTTAACCAGCACTGAAG	AAGGAGTGTTTCCTCAGTCT	G
1247_A10	csm2Δ	MMS	XII	43880	36924	SNP	1	T	2	A/T	52.6/47.4	61/55	116	A	52.586	61	T	47.414	55	TGCCTCATTGAATGGACTAT	GAATAAAATGTTGTTTTTTA	TGCCTCATTGAATGGACTAT	GAATAAAATGTTGTTTTTTA	A	25065
1247_A10	csm2Δ	MMS	XII	62014	55060	SNP	1	T	2	A/T	54.4/45.6	49/41	90	A	54.444	49	T	45.556	41	GGTCTTTGAGCAAAATCAAC	TTACAATTTTCAAAAATTAT	GGTCTTTGAGCAAAATCAAC	TTACAATTTTCAAAAATTAT	A	18134
1247_A10	csm2Δ	MMS	XII	67489	60535	SNP	1	A	2	A/G	51.9/48.1	54/50	104	A	51.923	54	G	48.077	50	CCTGGATATAGTAGTAGCAA	CGATTACAAGGCCCTCTGGA	CCTGGATATAGTAGTAGCAA	CGATTACAAGGCCCTCTGGA	G	5475
1247_A10	csm2Δ	MMS	XII	69731	62777	SNP	1	C	2	T/C	52.5/47.5	52/47	99	T	52.525	52	C	47.475	47	AGGAAATATAAGCCCACTCA	TTATTGTTTTTGGAAACAGC	AGGAAATATAAGCCCACTCA	TTATTGTTTTTGGAAACAGC	T	2242
1247_A10	csm2Δ	MMS	XII	95705	88751	SNP	1	A	2	C/A	52.9/47.1	36/32	68	C	52.941	36	A	47.059	32	TTGGGTTGGCAACCTCTTGC	ATTCCTTCAATTGGTCATCG	TTGGGTTGGCAACCTCTTGC	ATTCCTTCAATTGGTCATCG	C	25974
1247_A10	csm2Δ	MMS	XII	98104	91150	SNP	1	T	2	T/A	51.4/48.6	57/54	111	T	51.351	57	A	48.649	54	TCTTTTGACGAATGGTGGGA	AGATGGGTGGCTTATGATCC	TCTTTTGACGAATGGTGGGA	AGATGGGTGGCTTATGATCC	A	2399
1247_A10	csm2Δ	MMS	XII	98453	91499	SNP	1	G	2	G/T	53.1/46.9	43/38	81	G	53.086	43	T	46.914	38	AACGCGAAAAATGGGATTAA	CTGAATGAAAATCTTGGAGT	AACGCGAAAAATGGGATTAA	CTGAATGAAAATCTTGGAGT	T	349
1247_A10	csm2Δ	MMS	XII	121973	115017	SNP	1	C	2	G/C	49.0/45.1	25/23	51	G	49.02	25	C	45.098	23	GAGTAGATATCAAAATAAAA	AAAATAAAATAGAGTAAGTG	GAGTAGATATCAAAATAAAA	AAAATAAAATAGAGTAAGTG	G	23520
1247_A10	csm2Δ	MMS	XII	150485	143523	SNP	1	C	2	C/A	54.1/45.9	60/51	111	C	54.054	60	A	45.946	51	ACGATCATTTCCTTTTTAAC	GTTAAGCAAGCGACAAGATG	ACGATCATTTCCTTTTTAAC	GTTAAGCAAGCGACAAGATG	A	28512
1247_A10	csm2Δ	MMS	XII	153025	146062	SNP	1	C	2	C/G	51.6/48.4	63/59	122	C	51.639	63	G	48.361	59	CATCAAACTGTATATGCGTT	GTAAAAAGTCTAAGTCAGAA	CATCAAACTGTATATGCGTT	GTAAAAAGTCTAAGTCAGAA	G	2540
1247_A10	csm2Δ	MMS	XII	191891	184929	SNP	1	C	2	A/C	55.0/45.0	55/45	100	A	55	55	C	45	45	TAATATATTGGAATCTAGAT	CATAGAAATTGTAGAAATGG	TAATATATTGGAATCTAGAT	CATAGAAATTGTAGAAATGG	A	38866
1247_A10	csm2Δ	MMS	XII	205902	198934	SNP	1	A	2	G/A	50.5/49.5	53/52	105	G	50.476	53	A	49.524	52	GGAGAATCCTTGATGAAAAG	AGACGTACAGAGGGAGGAAA	GGAGAATCCTTGATGAAAAG	AGACGTACAGAGGGAGGAAA	G	14011
1247_A10	csm2Δ	MMS	XII	214901	207933	SNP	1	A	2	T/A	52.3/47.7	56/51	107	T	52.336	56	A	47.664	51	AATGGACGCAACCGGAATCG	ACCGATGACCTCTTCCTTGC	AATGGACGCAACCGGAATCG	ACCGATGACCTCTTCCTTGC	T	8999
1247_A10	csm2Δ	MMS	XII	236007	225341	SNP	1	G	2	T/G	51.5/47.5	51/47	99	T	51.515	51	G	47.475	47	TGCTATGGGTACTACCACTT	CAATACTGAAATTAGGTAGA	TGCTATGGGTACTACCACTT	CAATACTGAAATTAGGTAGA	T	21106
1247_A10	csm2Δ	MMS	XII	243079	232413	SNP	1	C	2	T/C	51.1/48.9	47/45	92	T	51.087	47	C	48.913	45	GATGTCGCCATCCCATGTAA	AACAGAGGTAAGCACTCCAT	GATGTCGCCATCCCATGTAA	AACAGAGGTAAGCACTCCAT	T	7072
1247_A10	csm2Δ	MMS	XII	250664	239998	SNP	1	A	2	A/C	51.4/48.6	57/54	111	A	51.351	57	C	48.649	54	TCAATTGAATACGTATTTGC	CCGTTATGTTTTAATTTGTG	TCAATTGAATACGTATTTGC	CCGTTATGTTTTAATTTGTG	C	7585
1247_A10	csm2Δ	MMS	XII	283447	272781	SNP	1	C	2	C/G	52.7/47.3	49/44	93	C	52.688	49	G	47.312	44	GTCTAAGAAGTGGGGTTTCA	CAACTTGGACAGACCAGAAT	GTCTAAGAAGTGGGGTTTCA	CAACTTGGACAGACCAGAAT	G	32783
1247_A10	csm2Δ	MMS	XII	348136	337474	SNP	1	A	2	T/A	52.9/47.1	55/49	104	T	52.885	55	A	47.115	49	TCATCTACGGGGTGAATTGG	AGAGGATACTTGTAACGCTT	TCATCTACGGGGTGAATTGG	AGAGGATACTTGTAACGCTT	T	64689
1247_A10	csm2Δ	MMS	XII	351079	340417	SNP	1	T	2	T/A	54.2/45.8	52/44	96	T	54.167	52	A	45.833	44	TCGTTTTCCTCTTCTGCATT	TCATCGTTTTCAATTTCCTC	TCGTTTTCCTCTTCTGCATT	TCATCGTTTTCAATTTCCTC	A	2943
1247_A10	csm2Δ	MMS	XII	435207	424545	SNP	1	T	2	T/C	50.5/49.5	53/52	105	T	50.476	53	C	49.524	52	CCAGATGAATCTGAGCAATT	GAAAGGTTAAAACATCATGC	CCAGATGAATCTGAGCAATT	GAAAGGTTAAAACATCATGC	C	84128
1247_A10	csm2Δ	MMS	XII	469027	443712	SNP	1	G	2	T/G	54.3/45.7	25/21	46	T	54.348	25	G	45.652	21	AGATAGAACTGAGTTGGAGC	TTGCAGCGGCACGAGCAGTG	AGATAGAACTGAGTTGGAGC	TTGCAGCGGCACGAGCAGTG	T	33820
1247_A10	csm2Δ	MMS	XII	498858	454700	SNP	1	A	2	T/A	51.0/49.0	51/49	100	T	51	51	A	49	49	GTTATATCAGAAACTTCCTT	CTTCTATCTTTTATTCCAAT	GTTATATCAGAAACTTCCTT	CTTCTATCTTTTATTCCAAT	T	29831
1247_A10	csm2Δ	MMS	XII	855487	803603	SNP	1	G	2	G/T	52.4/47.6	54/49	103	G	52.427	54	T	47.573	49	ATTTACATGGCTCAAGAAGT	TTGCTGCTCAAAATTTCATT	ATTTACATGGCTCAAGAAGT	TTGCTGCTCAAAATTTCATT	T	356629
1247_A10	csm2Δ	MMS	XII	870883	818999	SNP	1	T	2	A/T	51.6/48.4	49/46	95	A	51.579	49	T	48.421	46	TTCTCTTCAAAAAGTCCTCG	CTATTTCCAGCAGGTTAGCA	TTCTCTTCAAAAAGTCCTCG	CTATTTCCAGCAGGTTAGCA	A	15396
1247_A10	csm2Δ	MMS	XII	971616	918564	SNP	1	C	2	C/G	54.1/45.9	66/56	122	C	54.098	66	G	45.902	56	TGGAATTGTTTCCGGCACTT	GAGCACCTTTTTGGCAGGGT	TGGAATTGTTTCCGGCACTT	GAGCACCTTTTTGGCAGGGT	G	100733
1247_A10	csm2Δ	MMS	XII	1067369	1013173	SNP	1	C	2	C/G	54.0/46.0	251/214	465	C	53.978	251	G	46.022	214	TCCATTTTGCCGTAGGATAC	CTTACCGTTATCCAGAGCTT	TCCATTTTGCCGTAGGATAC	CTTACCGTTATCCAGAGCTT	G	95753
1247_A10	csm2Δ	MMS	XIII	10295	5706	SNP	1	T	2	C/T	50.4/49.6	57/56	113	C	50.442	57	T	49.558	56	TGCATGTACTTTCGAGCTCA	TGAAAAGGAACTCTCTTCAG	TGCATGTACTTTCGAGCTCA	TGAAAAGGAACTCTCTTCAG	C
1247_A10	csm2Δ	MMS	XIII	25636	21048	SNP	1	G	2	T/G	51.0/49.0	74/71	145	T	51.034	74	G	48.966	71	TGTTGCCAACCGAAACCTTC	TCATCGATGGACTCCAAAGC	TGTTGCCAACCGAAACCTTC	TCATCGATGGACTCCAAAGC	T	15341
1247_A10	csm2Δ	MMS	XIII	92623	88034	SNP	1	T	2	A/T	52.3/47.7	57/52	109	A	52.294	57	T	47.706	52	TACCATTACAATTTTACAGT	ACAAAATCACAAAAGGCAGA	TACCATTACAATTTTACAGT	ACAAAAACACAAAAGGCAGA	A	66987	Complex
1247_A10	csm2Δ	MMS	XIII	92630	88041	SNP	1	T	2	A/T	51.4/48.6	56/53	109	A	51.376	56	T	48.624	53	ACAATTTTACAGTTACAAAA	CACAAAAGGCAGAAGAAATT	ACAATTTTACAGTAACAAAA	CACAAAAGGCAGAAGAAATT	A	7	Complex
1247_A10	csm2Δ	MMS	XIII	101481	96894	SNP	1	G	2	A/G	50.0/50.0	54/54	108	A	50	54	G	50	54	ACCCTTGAAATTTTCGTTTA	GTGCCGGCTCGTTAAGGGCC	ACCCTTGAAATTTTCGTTTA	GTGCCGGCTCGTTAAGGGCC	A	8851
1247_A10	csm2Δ	MMS	XIII	113387	108800	SNP	1	A	2	A/G	54.8/45.2	51/42	93	A	54.839	51	G	45.161	42	TTTCGTTTATGGTATGCGAC	TTTCCCCGATGAATACTGCA	TTTCGTTTATGGTATGCGAC	TTTCCCCGATGAATACTGCA	G	11906
1247_A10	csm2Δ	MMS	XIII	118877	114290	SNP	1	G	2	G/T	50.6/49.4	42/41	83	G	50.602	42	T	49.398	41	TGGCTTTGCCATCTGTTTCA	TCCCTTGAATAGCGGCGGCA	TGGCTTTGCCATCTGTTTCA	TCCCTTGAATAGCGGCGGCA	T	5490
1247_A10	csm2Δ	MMS	XIII	124534	119947	SNP	1	T	2	C/T	50.0/50.0	51/51	102	C	50	51	T	50	51	ATGTACGGATTTAATAGCAG	CTTCACATTTCTTTCTTCTC	ATGTACGGATTTAATAGCAG	CTTCACATTTCTTTCTTCTC	C	5657
1247_A10	csm2Δ	MMS	XIII	218621	204433	SNP	1	C	2	C/G	53.6/46.4	60/52	112	C	53.571	60	G	46.429	52	CTTTATAGGAAATGCATTAT	AACGGGGATGAAGTAGTATT	CTTTATAGGAAATGCATTAT	AACGGGGATGAAGTAGTATT	G	94087
1247_A10	csm2Δ	MMS	XIII	363742	349469	SNP	1	G	2	G/A	52.0/48.0	53/49	102	G	51.961	53	A	48.039	49	ACAACTAAATGAGGAACTTT	CGCAGTTGCAAGAGAGAATA	ACAACTAAATGAGGAACTTT	CGCAGTTGCAAGAGAGAATA	A	145121
1247_A10	csm2Δ	MMS	XIII	371994	357721	SNP	1	A	2	T/A	54.2/45.8	52/44	96	T	54.167	52	A	45.833	44	AATAGTATCGAATAACCAGC	TAATATTTTCTCTGGAAATA	AATAGTATCGAATAACCAGC	TAATATTTTCTCTGGAAATA	T	8252
1247_A10	csm2Δ	MMS	XIII	372840	358567	SNP	1	T	2	C/T	53.0/47.0	35/31	66	C	53.03	35	T	46.97	31	TATATTTCTACATACTAATA	TACGATTATTCCTCATTCCG	TATATTTCTACATACTAATA	TACGATTATTCCTCATTCCG	C	846
1247_A10	csm2Δ	MMS	XIII	378433	360517	SNP	1	A	2	G/A	51.0/49.0	26/25	51	G	50.98	26	A	49.02	25	TTCTACATACTAATATTACG	TTATTCCTCATTCCGTTTTA	TTCTACATACTAATATTACG	TTATTCCTCATTCCGTTTTA	G	5593
1247_A10	csm2Δ	MMS	XIII	514698	496785	SNP	1	T	2	T/A	53.8/46.2	50/43	93	T	53.763	50	A	46.237	43	GCTCCAATACAAGCGCCACT	CAACAACGTCAAATTCCCAT	GCTCCAATACAAGCGCCACT	CAACAACGTCAAATTCCCAT	A	136265
1247_A10	csm2Δ	MMS	XIII	552435	534520	SNP	1	T	2	C/T	51.0/49.0	50/48	98	C	51.02	50	T	48.98	48	TAAATATTCTCATTTTTCTC	CAATGAAATAATTGTTACTA	TAAATATTCTCATTTTTCTC	CAATGAAATAATTGTTACTA	C	37737
1247_A10	csm2Δ	MMS	XIII	573003	555074	SNP	1	A	2	T/A	51.0/49.0	51/49	100	T	51	51	A	49	49	AATGCTTTAATACTCAATAA	AGCAACAATGGAGAATAATT	AATGCTTTAATATTCAATAA	AGCAACAATGGAGAATAATT	T	20568
1247_A10	csm2Δ	MMS	XIII	747966	730035	SNP	1	G	2	T/G	50.4/49.6	60/59	119	T	50.42	60	G	49.58	59	CCATTACGCCACGCGAGCTA	TCATATGTTTCTTTCGTCTT	CCATTACGCCACGCGAGCTA	TCATATGTTTCTTTCGTCTT	T	174963
1247_A10	csm2Δ	MMS	XIII	793544	775613	SNP	1	A	2	G/A	50.5/49.5	52/51	103	G	50.485	52	A	49.515	51	TATTGAATGTTTGCTCGTCC	CTTGATGCTCCCTGGAGTTG	TATTGAATGTTTGCTCGTCC	CTTGATGCTCCCTGGAGTTG	G	45578
1247_A10	csm2Δ	MMS	XIII	837907	819974	SNP	1	G	2	C/G	51.5/47.6	53/49	103	C	51.456	53	G	47.573	49	TATTAGACGGACTCATAATT	AATGGTTATCAGTTAATTGA	TATTAGACGGACTCATAATT	AATGGTTATCAGTTAATTGA	C	44363
1247_A10	csm2Δ	MMS	XIII	924297	900371	SNP	1	A	2	A/T	54.5/36.4	2018-06-04	11	A	54.545	6	T	36.364	4	GGTTAGGGTAGGGTTAGGGT	GTGTTAGGGTGTGGGTGTGG	#NAME?	GTGTTAGGGTGTGGGTGTGG	T	86390
1247_A10	csm2Δ	MMS	XIV	14225	8601	SNP	1	T	2	T/C	54.3/45.7	50/42	92	T	54.348	50	C	45.652	42	GGGGCAGTCGGCTATTGTAG	TTCTATATATTATGTAGCAC	GGGGCAGTCGGCTATTGTAG	TTCTATATATTATGTAGCAC	C
1247_A10	csm2Δ	MMS	XIV	44649	39026	SNP	1	G	2	A/G	50.5/49.5	49/48	97	A	50.515	49	G	49.485	48	GGACCTCTTCAGCGCAGATC	AGCCCAATTCTCTCCTTCCC	GGACCTCTTCAGCGCAGATC	AGCCCAATTCTCTCCTTCCC	A	30424
1247_A10	csm2Δ	MMS	XIV	147961	138668	SNP	1	T	2	C/T	53.4/46.6	47/41	88	C	53.409	47	T	46.591	41	GCTCTGGTGTGCAATATGGA	CTTGATACAGAGTCTCGGAT	GCTCTGGTGTGCAATATGGA	CTTGATACAGAGTCTCGGAT	C	103312
1247_A10	csm2Δ	MMS	XIV	159156	149863	SNP	1	G	2	C/G	50.5/49.5	51/50	101	C	50.495	51	G	49.505	50	CAATCATCATCTTTGGATAC	GCATTATGGAGTTCTTTTTC	CAATCATCATCTTTGGATAC	GCATTATGGAGTTCTTTTTC	C	11195
1247_A10	csm2Δ	MMS	XIV	204275	194982	SNP	1	T	2	A/T	50.6/49.4	42/41	83	A	50.602	42	T	49.398	41	GAGGAGGTTGAACCAGCTGC	ACAGAAAGTACCGTATCACA	GAGGAGGTTGAACCAGCTGC	ACAGAAAGTACCGTATCACA	A	45119
1247_A10	csm2Δ	MMS	XIV	260926	251639	SNP	1	G	2	G/T	54.7/45.3	52/43	95	G	54.737	52	T	45.263	43	CAAGACATCACCATATGTTT	AACTAAGTATTTGTTTAAAA	CAAGACATCACCATATGTTT	AACTAAGTATTTGTTTAAAA	T	56651
1247_A10	csm2Δ	MMS	XIV	302635	293343	SNP	1	C	2	C/G	53.2/46.8	58/51	109	C	53.211	58	G	46.789	51	TTGTTAGATTAGTTTTTGAA	ATTGTTTTGATAACTGAAAA	TTGTTAGATTAGTTTTTGAA	ATTGTTTTGATAACTGAAAA	G	41709
1247_A10	csm2Δ	MMS	XIV	319804	310509	SNP	1	C	2	T/C	53.8/46.2	49/42	91	T	53.846	49	C	46.154	42	ACATTGCACTTGAATAATCA	TCCTTGAAATGCTACTCTCT	ACATTGCACTTGAATAATCA	TCCTTGAAATGCTACTCTCT	T	17169
1247_A10	csm2Δ	MMS	XIV	372354	363059	SNP	1	G	2	G/T	54.4/45.6	56/47	103	G	54.369	56	T	45.631	47	TCCGGCAATTTTTTTTGCCC	AAAAAGACTAAGGCGGGTGA	TCCGGCAATTTTTTTTGCCC	AAAAAGACTAAGGCGGGTGA	T	52550
1247_A10	csm2Δ	MMS	XIV	374929	365634	SNP	1	G	2	A/G	52.7/47.3	49/44	93	A	52.688	49	G	47.312	44	AACTTCGGTCAAGTCATCTG	AGGTCCTGTGTTCGATCCAC	AACTTCGGTCAAGTCATCTG	AGGTCCTGTGTTCGATCCAC	A	2575
1247_A10	csm2Δ	MMS	XIV	394935	385640	SNP	1	T	2	T/C	50.6/49.4	41/40	81	T	50.617	41	C	49.383	40	CAACGTTGTTAAATCAGTGG	TTCCATTCATTTTTCACAAG	CAACGTTGTTAAATCAGTGG	TTCCATTCATTTTTCACAAG	C	20006
1247_A10	csm2Δ	MMS	XIV	424599	415304	SNP	1	T	2	A/T	50.0/50.0	44/44	88	A	50	44	T	50	44	TATGAAGCGAGTACTTATTG	CCTTTATGCCTAGTTTTCCA	TATGAAGCGAGTACTTATTG	CCTTTATGCCTAGTTTTCCA	A	29664
1247_A10	csm2Δ	MMS	XIV	446624	437317	SNP	1	C	2	C/T	53.2/46.8	58/51	109	C	53.211	58	T	46.789	51	AGACAGACAGATAATTCCCA	AGATTTGATGTCTTTATCTT	AGACAGACAGATAATTCCCA	AGATTTGATGTCTTTATCTT	T	22025
1247_A10	csm2Δ	MMS	XIV	456829	447522	SNP	1	G	2	T/G	52.9/47.1	54/48	102	T	52.941	54	G	47.059	48	TATTAATTGGGTTTGCTGTA	ACAATTTTGAATCACTAATT	TATTAATTGGGTTTGCTGTA	ACAATTGTGAATCACTAATT	T	10205
1247_A10	csm2Δ	MMS	XIV	525712	516403	SNP	1	C	2	G/C	53.8/46.2	50/43	93	G	53.763	50	C	46.237	43	ATAATTGTCGTCGCACAAGA	TGCCCCTCCCGTCCTCAGAC	ATAATTGTCGTCGCACAAGA	TGCCCCTCCCGTCCTCAGAC	G	68883
1247_A10	csm2Δ	MMS	XIV	573574	563522	SNP	1	G	2	A/G	50.0/50.0	47/47	94	A	50	47	G	50	47	GACCAGTACACTCTGGACTC	CTATCCCACCACAACCATGG	GACCAGTACACTCTGGACTC	CTATCCCACCACAACCATGG	A	47862
1247_A10	csm2Δ	MMS	XIV	628801	618749	SNP	1	A	2	A/G	53.2/46.8	50/44	94	A	53.191	50	G	46.809	44	ATTTTAAAACATTTTAAAAA	TATACATTTTTTTATTATTT	ATTTTAAAACATTTTAAAAA	TATACATTTTTTTATAATTT	G	55227
1247_A10	csm2Δ	MMS	XIV	628817	618765	SNP	1	T	2	A/T	50.5/49.5	47/46	93	A	50.538	47	T	49.462	46	AAAAATATACATTTTTTTAT	ATTTTTTTATATATTAATGT	AAAAATATACATTTTTTTAT	ATTTTTTTATATATTAATGT	A	16
1247_A10	csm2Δ	MMS	XIV	635273	625221	SNP	1	A	2	G/A	51.0/49.0	51/49	100	G	51	51	A	49	49	AGCATTGTCCGATAGCTGTA	CCCATTTTCTATCATTCCAC	AGCATTGTCCGATAGCTGTA	CCCATTTTCTATCATTCCAC	G	6456
1247_A10	csm2Δ	MMS	XIV	642010	631958	SNP	1	G	2	A/G	53.5/46.5	53/46	99	A	53.535	53	G	46.465	46	ACCCAACTGAAAGGGCATAT	TATATAAGGAAGAGGATGAC	ACCCAACTGAAAGGGCATAT	TATATAAGGAAGAGGATGAC	A	6737
1247_A10	csm2Δ	MMS	XIV	685636	675584	SNP	1	T	2	T/C	53.6/46.4	59/51	110	T	53.636	59	C	46.364	51	AAAACACCCGTTCTTAGCTG	TCTTTAACAGTACTACTCTC	AAAACACCCGTTCTTAGCTG	TCTTTAACAGTACTACTCTC	C	43626
1247_A10	csm2Δ	MMS	XIV	735780	725728	SNP	1	G	2	G/C	50.4/49.6	65/64	129	G	50.388	65	C	49.612	64	AAGGAATTCTTATTTCTTGC	TAAAATGCATTCTTTTACGC	AAGGAATTCTTATTTCTTGC	TAAAATGCATTCTTTTACGC	C	50144
1247_A10	csm2Δ	MMS	XV	257714	254305	SNP	1	A	2	A/T	53.3/46.7	49/43	92	A	53.261	49	T	46.739	43	GTGCACTGGCATCTACACTG	GAGATACGATCATTTCAGGA	GTGCACTGGCATCTACACTG	GAGATACGATCATTTCAGGA	T
1247_A10	csm2Δ	MMS	XV	328018	324609	SNP	1	T	2	C/T	54.2/45.8	52/44	96	C	54.167	52	T	45.833	44	TCTTTATGAATCAAGAAATG	CGCAAAAAGAAGGTTTGAAT	TCTTTATGAATCAAGAAATG	CGCAAAAAGAAGGTTTGAAT	C	70304
1247_A10	csm2Δ	MMS	XV	373000	369591	SNP	1	G	2	A/G	52.9/47.1	63/56	119	A	52.941	63	G	47.059	56	TGTCTTTGATAATCAACTGT	TTGTTCTTATGGCAGTATCC	TGTCTTTGATAATCAACTGT	TTGTTCTTATGGCAGTATCC	A	44982
1247_A10	csm2Δ	MMS	XV	438190	434781	SNP	1	T	2	T/C	53.4/46.6	55/48	103	T	53.398	55	C	46.602	48	ATGAATGATTATTATTGGGC	TCTACCGTTGCTAAAGGCTA	ATGAATGATTATTATTGGGC	TCTACCGTTGCTAAAGGCTA	C	65190
1247_A10	csm2Δ	MMS	XV	506016	502607	SNP	1	A	2	T/A	50.8/49.2	66/64	130	T	50.769	66	A	49.231	64	TGTGAACGGGACGATACCAG	ATGTTTCAATCTAGAAAAGT	TGTGAACGGGACGATACCAG	ATGTTTCAATCTAGAAAAGT	T	67826
1247_A10	csm2Δ	MMS	XV	514196	510787	SNP	1	T	2	C/T	51.6/48.4	49/46	95	C	51.579	49	T	48.421	46	TTTCGCGTACAGGGTTTGAT	TTATAGGTGGACGAGACTTG	TTTCGCGTACAGGGTTTGAT	TTATAGGTGGACGAGACTTG	C	8180
1247_A10	csm2Δ	MMS	XV	515627	512218	SNP	1	A	2	C/A	50.6/49.4	41/40	81	C	50.617	41	A	49.383	40	GGTAACAAATTGGACCTTGA	AATGAAAGACAAGTCTCTTA	GGTAACAAATTGGACCTTGA	AATGAAAGACAAGTCTCTTA	C	1431
1247_A10	csm2Δ	MMS	XV	516946	513537	SNP	1	G	2	G/T	54.1/45.9	59/50	109	G	54.128	59	T	45.872	50	TTTTTCATCCTTTAAAACAC	TTATTCTCTATTTTTGCCCT	TTTTTCATCCTTTAAAACAC	TTATTCTCTATTTTTGCCCT	T	1319
1247_A10	csm2Δ	MMS	XV	543754	540345	SNP	1	C	2	C/T	52.9/47.1	54/48	102	C	52.941	54	T	47.059	48	TACGTCTTAAATTATCTACG	CTGGACGACGAAGTTCATGC	TACGTCTTAAATTATCTACG	CTGGACGACGAAGTTCATGC	T	26808
1247_A10	csm2Δ	MMS	XV	584258	580567	SNP	1	G	2	G/C	51.4/48.6	56/53	109	G	51.376	56	C	48.624	53	CTAGAGAAAATGAGATCATA	TTTAAAGAGACATACGTTAT	CTAGAGAAAATGAGATCATA	TTTAAAGAGACATACGTTAT	C	40504
1247_A10	csm2Δ	MMS	XV	692589	684795	SNP	1	G	2	T/G	51.7/48.3	61/57	118	T	51.695	61	G	48.305	57	TAGACATTAGGAAAGAAAAT	GGAAATTAAGAATGGCAGGC	TAGACATTAGGAAAGAAAAT	GGAAATTAAGAATGGCAGGC	T	108331
1247_A10	csm2Δ	MMS	XV	742334	733668	SNP	1	G	2	G/T	53.7/46.3	58/50	108	G	53.704	58	T	46.296	50	TTTTGTAACCAGTACCCTGT	CAAATTCTCGGCGTGTACTA	TTTTGTAACCAGTACCCTGT	CAAATTCTCGGCGTGTACTA	T	49745
1247_A10	csm2Δ	MMS	XV	746931	738265	SNP	1	G	2	G/T	51.9/48.1	42/39	81	G	51.852	42	T	48.148	39	CTCTGAAGACACTGGCAATT	GTCCATATATTTCTTTATAA	CTCTGAAGACACTGGCAATT	GTCCATATATTTCTTTATAA	T	4597
1247_A10	csm2Δ	MMS	XV	747747	739081	SNP	1	T	2	T/C	51.3/48.7	59/56	115	T	51.304	59	C	48.696	56	AAAGATATCAATAGATTGGA	ATCAGTTCTTTATCAACGGA	AAAGATATCAATAGATTGGA	ATCAGTTCTTTATCAACGGA	C	816
1247_A10	csm2Δ	MMS	XV	878731	870065	SNP	1	A	2	A/G	54.8/45.2	69/57	126	A	54.762	69	G	45.238	57	AATTATACAAATGCATCTAT	TACAGTAGCAGCAGAAATGC	AATTATACAAATGCATCTAT	TACAGTAGCAGCAGAAATGC	G	130984
1247_A10	csm2Δ	MMS	XV	884257	875591	SNP	1	G	2	T/G	55.0/45.0	44/36	80	T	55	44	G	45	36	AGTTGTCATAATTAACGGGC	CTTCTTGTAATTAAATGAAC	AGTTGTCATAATTAACGGGC	CTTCTTGTAATTAAATGAAC	T	5526
1247_A10	csm2Δ	MMS	XV	907776	899110	SNP	1	G	2	C/G	52.6/47.4	51/46	97	C	52.577	51	G	47.423	46	CGTCAGCTTATATTGCCTTC	TACAGAAAATGAAAATTCAC	CGTCAGCTTATATTGCCTTC	TACAGAAAATGAAAATTCAC	C	23519
1247_A10	csm2Δ	MMS	XV	978162	968792	SNP	1	T	2	A/T	54.7/45.3	41/34	75	A	54.667	41	T	45.333	34	AAGTGAACAAAAAAAAAAAA	AATAGTAAAGTAGAGAGACT	AAGTGAACAAAAAAAAAAAA	AATAGTAAAGTAGAGAGACT	A	70386
1247_A10	csm2Δ	MMS	XV	978315	968945	SNP	1	C	2	A/C	50.0/48.9	46/45	92	A	50	46	C	48.913	45	ATTAAGATAGCTTTACTTTC	CATGAATTGATATATGAAGT	ATTAAGATAGCTTTACTTTC	CATGAATTGATATATGAAGT	A	153
1247_A10	csm2Δ	MMS	XVI	31070	22746	SNP	1	G	2	G/T	51.7/48.3	60/56	116	G	51.724	60	T	48.276	56	TATTATTGAGGATACTAAGT	AGCGTGTTGTTGCACGCCTA	TATTATTGAGGATACTAAGT	AGCGTGTTGTTGCACGCCTA	T
1247_A10	csm2Δ	MMS	XVI	41137	32813	SNP	1	A	2	T/A	50.8/49.2	60/58	118	T	50.847	60	A	49.153	58	CGCTTACTATTCGAAACAAA	TCCTGACAATTTCCCTGTAA	CGCTTACTATTCGAAACAAA	TCCTGACAATTTCCCTGTAA	T	10067
1247_A10	csm2Δ	MMS	XVI	68510	55834	SNP	1	C	2	T/C	54.9/45.1	50/41	91	T	54.945	50	C	45.055	41	CAAACTTATAAGCAAGCATA	GAGGAAATGAGAGCAGAACT	CAAACTTATAAGCAAGCATA	GAGGAAATGAGAGCAGAACT	T	27373
1247_A10	csm2Δ	MMS	XVI	76380	63704	SNP	1	C	2	T/C	54.7/45.3	52/43	95	T	54.737	52	C	45.263	43	TCTCTCTCTCTCTCCTAGTG	ATTCATGCTAGCTTCCCTCG	TCTCTCTCTCTCTCCTAGTG	ATTCATGCTAGCTTCCCTCG	T	7870
1247_A10	csm2Δ	MMS	XVI	109758	97082	SNP	1	T	2	A/T	54.7/45.3	64/53	117	A	54.701	64	T	45.299	53	AAAGAAAAGGACACTGTTGC	GAACTTCAAGCTCAGTTGGA	AAAGAAAAGGACACTGTTGC	GAACTTCAAGCTCAGTTGGA	A	33378
1247_A10	csm2Δ	MMS	XVI	118583	105907	SNP	1	A	2	G/A	53.2/46.8	59/52	111	G	53.153	59	A	46.847	52	CGATTGACAATTACAAGGAG	GTACTGGTCATGGCTCGCAC	CGATTGACAATTACAAGGAG	GTACTGGTCATGGCTCGCAC	G	8825
1247_A10	csm2Δ	MMS	XVI	185248	172571	SNP	1	A	2	A/C	52.4/47.6	54/49	103	A	52.427	54	C	47.573	49	ATCAATCTACTTTCCTTAAA	ATTTTTCGTCCAATTAAAAG	ATCAATCTACTTTCCTTAAA	ATTTTTCGTCCAATTAAAAG	C	66665
1247_A10	csm2Δ	MMS	XVI	273601	260924	SNP	1	A	2	A/T	53.6/46.4	45/39	84	A	53.571	45	T	46.429	39	AAGATCTCAAATGCAATTAG	CAGTGGTGCAAGAATAATGT	AAGATCTCAAATGCAATTAG	CAGTGGTGCAAGAATAATGT	T	88353
1247_A10	csm2Δ	MMS	XVI	319088	306411	SNP	1	C	2	C/A	54.9/45.1	50/41	91	C	54.945	50	A	45.055	41	TTTTAGGAAAAGCTTAGATA	CGAAATTTTGTTGATAGAGA	TTTTAGGAAAAGCTTAGATA	CGAAATTTTGTTGATAGAGA	A	45487
1247_A10	csm2Δ	MMS	XVI	340069	327392	SNP	1	T	2	C/T	50.5/49.5	49/48	97	C	50.515	49	T	49.485	48	AAATACATGCTTAAGCATGG	CTGCAAACAAGCATAGAGGA	AAATACATGCTTAAGCATGG	CTGCAAACAAGCATAGAGGA	C	20981
1247_A10	csm2Δ	MMS	XVI	358354	345677	SNP	1	T	2	G/T	51.7/48.3	61/57	118	G	51.695	61	T	48.305	57	ATGGGATTACCATGGTGTGT	AATAAAAAGGAGCACCATAG	ATGGGATTACCATGGTGTGT	AATAAAAAGGAGCACCATAG	G	18285
1247_A10	csm2Δ	MMS	XVI	435132	422455	SNP	1	A	2	A/T	53.8/46.2	50/43	93	A	53.763	50	T	46.237	43	TTTCGGCATTATCTAACCTT	CCAGTGAAATGAAGGTGTTG	TTTCGGCATTATCTAACCTT	CCAGTGAAATGAAGGTGTTG	T	76778
1247_A10	csm2Δ	MMS	XVI	435931	423254	SNP	1	G	2	G/A	51.5/48.5	53/50	103	G	51.456	53	A	48.544	50	AACTAAGGACCAACAGATTT	CAATCTGCTGCGCTACCACT	AACTAAGGACCAACAGATTT	CAATCTGCTGCGCTACCACT	A	799
1247_A10	csm2Δ	MMS	XVI	439123	424887	SNP	1	C	2	G/C	52.8/47.2	19/17	36	G	52.778	19	C	47.222	17	TAAGAAGGCACTTTTATTAA	TGTTTGTACTGGTGATCCAG	TAAGAAGGCACTTTTATTAA	TGTTTGTACTGGTGATCCAG	G	3192
1247_A10	csm2Δ	MMS	XVI	473751	457186	SNP	1	A	2	A/G	52.4/47.6	43/39	82	A	52.439	43	G	47.561	39	ACAACCACTTTATCCCCAGT	TAGAGGGTTTGCAGCATATT	ACAACCACTTTATCCCCAGT	TAGAGGGTTTGCAGCATATT	G	34628
1247_A10	csm2Δ	MMS	XVI	515851	499285	SNP	1	T	2	T/A	54.9/45.1	67/55	122	T	54.918	67	A	45.082	55	TTCCAGTTCCTCCTTTTGAG	ACCCCTTTCTCTTAGTTGAT	TTCCAGTTCCTCCTTTTGAG	ACCCCTTTCTCTTAGTTGAT	A	42100
1247_A10	csm2Δ	MMS	XVI	550770	534204	SNP	1	T	2	T/C	50.5/49.5	51/50	101	T	50.495	51	C	49.505	50	TGACCGGGGATATCTCCATT	TGGATTTCAGGTTCTTCTTC	TGACCGGGGATATCTCCATT	TGGATTTCAGGTTCTTCTTC	C	34919
1247_A10	csm2Δ	MMS	XVI	572297	555731	SNP	1	C	2	C/T	53.0/47.0	62/55	117	C	52.991	62	T	47.009	55	GGTTTAGTGGTAAAATCCAA	GTTGCCATCGTTGGGCCCCC	GGTTTAGTGGTAAAATCCAA	GTTGCCATCGTTGGGCCCCC	T	21527
1247_A10	csm2Δ	MMS	XVI	582520	565954	SNP	1	T	2	A/T	50.0/50.0	46/46	92	A	50	46	T	50	46	ACAGCGAGAAATAACGGTGT	AATTCGACGGGTATTTTGTA	ACAGCGAGAAATAACGGTGT	AATTCGACGGGTATTTTGTA	A	10223
1247_A10	csm2Δ	MMS	XVI	680275	663709	SNP	1	T	2	C/T	50.5/49.5	51/50	101	C	50.495	51	T	49.505	50	CAAGAGACCTACCACAGCTG	CATCTCAACTAAATTCTATT	CAAGAGACCTACCACAGCTG	CATCTCAACTAAATTCTATT	C	97755
1247_A10	csm2Δ	MMS	XVI	755487	738921	SNP	1	C	2	T/C	51.3/48.8	41/39	80	T	51.25	41	C	48.75	39	CGTAAAATTTGCTTTTCTTA	TGATTTGGAAGATGAAACAA	CGTAAAATTTGCTTTTCTTA	TGATTTGGAAGATGAAACAA	T	75212
1247_A10	csm2Δ	MMS	XVI	788034	771468	SNP	1	C	2	A/C	51.9/48.1	68/63	131	A	51.908	68	C	48.092	63	AGGAATTACTCCAATTTCTC	CCGTATTATGGTAAGCAGGT	AGGAATTACTCCAATTTCTC	CCGTATTATGGTAAGCAGGT	A	32547
1247_A10	csm2Δ	MMS	XVI	860381	833724	SNP	1	G	2	G/A	50.8/49.2	60/58	118	G	50.847	60	A	49.153	58	CACTCATGTAAATAACAAGC	CAAGTGGTTTAGTGGTAAAA	CACTCATGTAAATAACAAGC	CAAGTGGTTTAGTGGTAAAA	A	72347
1247_A10	csm2Δ	MMS	XVI	860411	833754	SNP	1	G	2	C/G	50.4/49.6	62/61	123	C	50.407	62	G	49.593	61	TAGTGGTAAAATCCAACGTT	CCATCGTTGGGCCCCCGGTT	TAGTGGTAAAATCCAACGTT	CCATCGTTGGGCCCCCGGTT	C	30
1247_A10	csm2Δ	MMS	XVI	930961	904304	SNP	1	T	2	T/C	52.3/47.7	58/53	111	T	52.252	58	C	47.748	53	GATTTAAAGTTTTTCTTTTC	CTAGCAGCACTCGTGGAAGT	GATTTAAAGTTTTTCTTTTC	CTAGCAGCACTCGTGGAAGT	C	70550
1247_A10	csm2Δ	MMS	III	20	20	DIP	1	C	2	C/-	51.5/47.4	50/46	97	C	51.546	50	-	47.423	46	CCCACACACCACACCCACA	CCACACCCACACACCACACA	CCCACACACCACACCCACA	CACACCCACACACCACACAC	-
1247_A10	csm2Δ	MMS	IV	459856	452705	DIP	1	T	2	-/T	51.9/48.1	55/51	106	-	51.887	55	T	48.113	51	TTATTTATCATCGGAGACTC	TTTTGTGGGACTATCGTTAA	TTATTTATCATCGGAGACTC	TTTTGTGGGACTATCGTTAA	-
1247_A10	csm2Δ	MMS	IV	681395	660819	DIP	3	---	2	---/TTT	53.6/41.2	52/40	97	---	53.608	52	TTT	41.237	40	TTGCGCATGGGTATGCAACC	TTTTTGTGGGTGACACCTCC	TTGCGCATGGGTATGCAACC	TTTTGGGTGACACCTCCTTC	TTT	221539
1247_A10	csm2Δ	MMS	VII	689499	673780	DIP	1	-	2	-/A	53.3/46.7	57/50	107	-	53.271	57	A	46.729	50	TTCAGAACTGTCGTTACAGC	AAAGGATGTCACTATTGTCG	TTCAGAACTGTCGTTACAGC	AAGGATGTCACTATTGTCGG	A
1247_A10	csm2Δ	MMS	VII	828720	802784	DIP	1	-	2	-/T	53.5/46.5	61/53	114	-	53.509	61	T	46.491	53	AATCATTTTTATTGCAAAAA	AAGCACTCACGATGGGGGTC	AATCATTTTTATTGCAAAAA	AGCACTCACGATGGGGGTCG	T	139221
1247_A10	csm2Δ	MMS	X	36401	22378	DIP	1	G	2	-/G	51.5/47.4	50/46	97	-	51.546	50	G	47.423	46	GAAAAAAAAAGAAAAATGAT	GGCACCCCATGATGATAAGA	GAAAAAAAAAGAAAAATGAT	GGCACCCCATGATGATAAGA	-
1247_A10	csm2Δ	MMS	XI	258321	258333	DIP	1	A	2	-/A	54.9/45.1	56/46	102	-	54.902	56	A	45.098	46	TTGTGCGGTCACCGCAAGGG	CAAAGCTTTTCTTAGAAAAC	TTGTGCGGTCACCGCAAGGG	CAAAGCTTTTCTTAGAAAAC	-
1247_A10	csm2Δ	MMS	XI	549471	549260	Complex DIP	1	T	2	-/C	47.5/41.6	48/42	101	-	47.525	48	C	41.584	42	TACGAACAGTTTGAATTTTC	TTTTTTTTCTTCGAAAATTC	TACGAACAGTTTGCATTTTC	TTTTTTTTCTTCGAAAATTC	-	291150
1247_A10	csm2Δ	MMS	XI	660716	660483	DIP	1	C	2	-/C	50.5/49.5	50/49	99	-	50.505	50	C	49.495	49	GTACTAATTTGCACCTGCTG	AAAGGAAATGTGGCACTACT	GTACTAATTTGCACCTGCTG	AAAGGAAATGTGGCACTACT	-	111245
1247_A10	csm2Δ	MMS	XII	435209	424547	DIP	1	-	2	-/A	52.8/47.2	56/50	106	-	52.83	56	A	47.17	50	AGATGAATCTGAGCAATTTG	AAAGGTTAAAACATCATGCG	AGATGAATCTGAGCAATTTG	AAGGTTAAAACATCATGCGA	A
1247_A10	csm2Δ	MMS	XV	41	40	DIP	4	CACA	2	CACA/----	48.4/44.1	45/41	93	CACA	48.387	45	----	44.086	41	CCACACCCACACACCACACC	CACACACACACACACACCAC	CCACACCCACACACCACACC	CACACACACACACCACACCC	----
1247_A11	csm2Δ	MMS	I	92824	91823	SNP	1	A	2	T/A	53.3/46.7	48/42	90	T	53.333	48	A	46.667	42	GCTATTGTTCTATTGTTATG	AACATTGTCTCAAAGAGTAA	GCTATTGTTCTATTGTTATG	AACATTGTCTCAAAGAGTAA	T
1247_A11	csm2Δ	MMS	I	111909	110908	SNP	1	C	2	T/C	54.7/45.3	41/34	75	T	54.667	41	C	45.333	34	GCTGCAAAGAATCGTACTCC	TCTGTGGTTCCCCATCGGTA	GCTGCAAAGAATCGTACTCC	TCTGTGGTTCCCCATCGGTA	T	19085
1247_A11	csm2Δ	MMS	I	151516	150502	SNP	1	G	2	G/A	51.0/49.0	26/25	51	G	50.98	26	A	49.02	25	AATATAAAATATTTTTAATA	TTTTTAAATATTTTACAGTT	AATATAAAATATTTTTAATA	TTTTTAAATATTTTACAGTT	A	39607
1247_A11	csm2Δ	MMS	I	154899	153885	SNP	1	G	2	C/G	50.9/49.1	27/26	53	C	50.943	27	G	49.057	26	AATTCACGTACAAAAATAGA	AATATATAAAATAATAGGTT	AATTCACGTACAAAAATAGA	AATATATAAAATAATAGGTT	C	3383
1247_A11	csm2Δ	MMS	II	162053	160196	SNP	1	A	2	A/T	53.4/46.6	39/34	73	A	53.425	39	T	46.575	34	ATACCCTTTTACATACGCCC	AGAGAAAGTCACAACATGCA	ATACCCTTTTACATACGCCC	AGAGAAAGTCACAACATGCA	T
1247_A11	csm2Δ	MMS	II	220315	218446	SNP	1	C	2	C/T	53.8/46.3	43/37	80	C	53.75	43	T	46.25	37	TAATATATACAACTTGGGTA	TTTAGAGGAGTTTGTCAGCA	TAATATATACAACTTGGGTA	TTTAGAGGAGTTTGTCAGCA	T	58262
1247_A11	csm2Δ	MMS	II	295974	286747	SNP	1	T	2	T/C	54.7/45.3	41/34	75	T	54.667	41	C	45.333	34	TATCATCTAGTGACACACGA	GAAGTTCTTCATCTAGTGAG	TATCATCTAGTGACACACGA	GAAGTTCTTCATCTAGTGAG	C	75659
1247_A11	csm2Δ	MMS	II	304013	294787	SNP	1	T	2	A/T	53.1/46.9	43/38	81	A	53.086	43	T	46.914	38	AATGACCATATTCTAGAAAA	TGCTGCAATTCGGATGCTGA	AATGACCATATTCTAGAAAA	TGCTGCAATTCGGATGCTGA	A	8039
1247_A11	csm2Δ	MMS	II	390514	381287	SNP	1	T	2	T/G	54.5/45.5	48/40	88	T	54.545	48	G	45.455	40	AAGCATGTGTTTAAAAGTAT	TCTAAGCAACTGATTTTTCT	AAGCATGTGTTTAAAAGTAT	TCTAAGCAACTGATTTTTCT	G	86501
1247_A11	csm2Δ	MMS	II	404073	394846	SNP	1	G	2	G/T	52.3/47.7	45/41	86	G	52.326	45	T	47.674	41	TTTAATGATAAATTTTCGAT	CCTAGATTGACTGTTAAATC	TTTAATGATAAATTTTCGAT	CCTAGATTGACTGTTAAATC	T	13559
1247_A11	csm2Δ	MMS	II	423980	414753	SNP	1	C	2	T/C	50.6/49.4	39/38	77	T	50.649	39	C	49.351	38	TATAGATTGAAAATTGATGT	AGACAATTTGTCACTGCTTC	TATAGATTGAAAATTGATGT	AGACAATTTGTCACTGCTTC	T	19907
1247_A11	csm2Δ	MMS	II	499852	490625	SNP	1	T	2	A/T	53.0/47.0	44/39	83	A	53.012	44	T	46.988	39	AAACAAAAAATCTTGTGTGT	CCATAATTTGGGAAAGAAAA	AAACAAAAAATCTTGTGTGT	CCATAATTTGGGAAAGAAAA	A	75872
1247_A11	csm2Δ	MMS	II	527363	518136	SNP	1	A	2	A/T	51.2/48.8	43/41	84	A	51.19	43	T	48.81	41	AGAGCATGATATCAGGTCGA	TTTGTCGTTTTCATTTCTCG	AGAGCATGATATCAGGTCGA	TTTGTCGTTTTCATTTCTCG	T	27511
1247_A11	csm2Δ	MMS	II	633370	624147	SNP	1	T	2	T/A	52.8/47.2	47/42	89	T	52.809	47	A	47.191	42	TTTGTTGCTTCTGCACGTTC	GCCATATTCATTACCAAGAG	TTTGTTGCTTCTGCACGTTC	GCCATATTCATTACCAAGAG	A	106007
1247_A11	csm2Δ	MMS	II	643050	633824	SNP	1	C	2	C/G	51.2/48.8	42/40	82	C	51.22	42	G	48.78	40	AGGACCAACAGATTTGCAAT	TGCTGCGCTACCACTGCGCC	AGGACCAACAGATTTGCAAT	TGCTGCGCTACCACTGCGCC	G	9680
1247_A11	csm2Δ	MMS	II	648908	639307	SNP	1	C	2	C/A	53.6/46.4	45/39	84	C	53.571	45	A	46.429	39	AATGAGGGCGGCATTTCAAA	ATGCGTGTAAATGATTCACT	AATGAGGGCGGCATTTCAAA	ATGCGTGTAAATGATTCACT	A	5858
1247_A11	csm2Δ	MMS	II	673932	664333	SNP	1	T	2	T/A	53.6/46.4	45/39	84	T	53.571	45	A	46.429	39	TTTTGTGTAACACACAATCT	ACCCCAAATTGCTTAAAAAT	TTTTGTGTAACACACAATCT	ACCCCAAATTGCTTAAAAAT	A	25024
1247_A11	csm2Δ	MMS	II	708730	699128	SNP	1	A	2	A/T	54.3/45.7	44/37	81	A	54.321	44	T	45.679	37	GATATTTCTCATAATCTTCA	TTCTTTCAATGTTAGACCAG	GATATTTCTCATAATCTTCA	TTCTTTCAATGTTAGACCAG	T	34798
1247_A11	csm2Δ	MMS	II	764435	754830	SNP	1	A	2	T/A	51.9/48.1	40/37	77	T	51.948	40	A	48.052	37	TGGGGAATGCTTCTCTTAAA	TCGTCTCTGTGCAGGTCTTA	TGGGGAATGCTTCTCTTAAA	TCGTCTCTGTGCAGGTCTTA	T	55705
1247_A11	csm2Δ	MMS	III	93194	90696	SNP	1	G	2	G/T	53.9/46.1	55/47	102	G	53.922	55	T	46.078	47	AGTCTTTTGATGTGAGCTTG	TCGTTGTCAAATTCTTTCTT	AGTCTTTTGATGTGAGCTTG	TCGTTGTCAAATTCTTTCTT	T
1247_A11	csm2Δ	MMS	III	98189	95691	SNP	1	T	2	T/C	53.9/46.1	55/47	102	T	53.922	55	C	46.078	47	CTGCTCACGAGCTTTGCGCT	ATGATTCCGAAAAAATAAAA	CTGCTCACGAGCTTTGCGCT	ATGATTCCGAAAAAATAAAA	C	4995
1247_A11	csm2Δ	MMS	III	137290	134792	SNP	1	C	2	C/G	50.4/49.6	60/59	119	C	50.42	60	G	49.58	59	AAAAACCCAGACACGCTCGA	TTCCTGTCTTCCTATTGATT	AAAAACCCAGACACGCTCGA	TTCCTGTCTTCCTATTGATT	G	39101
1247_A11	csm2Δ	MMS	III	179148	173626	SNP	1	T	2	T/C	50.7/49.3	36/35	71	T	50.704	36	C	49.296	35	CGGTTATTTTCTTCAGCCCA	TGATAAGGCGATATATGCCT	CGGTTATTTTCTTCAGCCCA	TGATAAGGCGATATATGCCT	C	41858
1247_A11	csm2Δ	MMS	III	193870	188348	SNP	1	G	2	G/C	50.5/49.5	47/46	93	G	50.538	47	C	49.462	46	AGTTGGTAGACCTTTTGGTC	TTAATGAAATTGAGGGTCTT	AGTTGGTAGACCTTTTGGTC	TTAATGAAATTGAGGGTCTT	C	14722
1247_A11	csm2Δ	MMS	III	203107	196856	SNP	1	G	2	G/A	52.0/48.0	39/36	75	G	52	39	A	48	36	TGTACTGAATATCTATTTTT	TGAATGTATCTTTGATTTCC	TGTACTGAATATCTATTTTT	TGAATGTATCTTTGATTTCC	A	9237
1247_A11	csm2Δ	MMS	III	203531	197280	SNP	1	C	2	A/C	52.9/47.1	45/40	85	A	52.941	45	C	47.059	40	AGACATACCGAAAGATCGTT	TGTTTTAGTCATCCTTCTGT	AGACATACCGAAAGATCGTT	TGTTTTAGTCATCCTTCTGT	A	424
1247_A11	csm2Δ	MMS	III	216127	209877	SNP	1	G	2	C/G	54.0/46.0	61/52	113	C	53.982	61	G	46.018	52	GTGTCGCACATTCTCCACCA	CCTCAACCCCAGCCAAATTT	GTGTCGCACATTCTCCACCA	CCTCAACCCCAGCCAAATTT	C	12596
1247_A11	csm2Δ	MMS	III	228042	221792	SNP	1	G	2	A/G	54.8/45.2	34/28	62	A	54.839	34	G	45.161	28	GTTCAAATCCTGCTGGTGTC	TTTAATTTTTTTTAAATAAC	GTTCAAATCCTGCTGGTGTC	TTTAATTTTTTTTAAATAAC	A	11915
1247_A11	csm2Δ	MMS	III	254155	247905	SNP	1	C	2	A/C	52.8/47.2	38/34	72	A	52.778	38	C	47.222	34	CTAATGAATGCACAATCTAA	GAAACAAAATTAAACTAAAC	CTAATGAATGCACAATCTAA	GAAACAAAATTAAACTAAAC	A	26113
1247_A11	csm2Δ	MMS	III	283441	277190	SNP	1	G	2	A/G	52.2/47.8	47/43	90	A	52.222	47	G	47.778	43	AAATTTTGTTGGAAGTAGTC	AAAAGTCATCAGGAATTGCT	AAATTTTGTTGGAAGTAGTC	AAAAGTCATCAGGAATTGCT	A	29286
1247_A11	csm2Δ	MMS	III	294392	288138	SNP	1	T	2	T/C	54.0/46.0	47/40	87	T	54.023	47	C	45.977	40	AGCTTTCCGCAACAGTAAAA	TTTATAAACCCTGGTTTTGG	AGCTTTCCGCAACAGTATAA	TTTATAAACCCTGGTTTTGG	C	10951
1247_A11	csm2Δ	MMS	III	295353	289099	SNP	1	T	2	C/T	53.6/46.4	52/45	97	C	53.608	52	T	46.392	45	TGCAGATTACTTTCCTAAAT	TGCATATAGAATTGTCAAGC	TGCAGATTACTTTCCTAAAT	TGCATATAGAATTGTCAAGC	C	961
1247_A11	csm2Δ	MMS	III	309017	302631	SNP	1	G	2	G/C	52.1/45.2	38/33	73	G	52.055	38	C	45.205	33	ACCTGCTTTAGATGTTGCTT	ATATTATTGAAATAAAAAAA	ACCTGCTTTAGATGTTGCTT	ATATTATTGAAATAAAAAAA	C	13664
1247_A11	csm2Δ	MMS	IV	297418	290713	SNP	1	A	2	T/A	51.2/48.8	44/42	86	T	51.163	44	A	48.837	42	AGAATACTATGAAGATATTT	TAAGCAGTCCTTGTGGTCTA	AGAATACTATGAAGATATTT	TAAGCAGTCCTTGTGGTCTA	T
1247_A11	csm2Δ	MMS	IV	297447	290742	SNP	1	C	2	C/G	53.4/46.6	47/41	88	C	53.409	47	G	46.591	41	CCTTGTGGTCTATGTTGAAG	ATTTTTTCAGAGGATCTCGT	CCTTGTGGTCTATGTTGAAG	ATTTTTTCAGAGGATCTCGT	G	29
1247_A11	csm2Δ	MMS	IV	321558	314853	SNP	1	T	2	T/C	51.0/49.0	25/24	49	T	51.02	25	C	48.98	24	TTCGCTTACCGACATTTTTA	CTTATATTGTATTGTTACTT	TTCGCTTACCGACATTTTTA	CTTATATTGTATTGTTACTT	C	24111
1247_A11	csm2Δ	MMS	IV	327153	320448	SNP	1	A	2	A/T	53.3/46.7	48/42	90	A	53.333	48	T	46.667	42	ACTCCAAAAAACTTAAACGT	CAAATAGTGATGACAAGTGC	ACTCCAAAAAACTTAAACGT	CAAATAGTGATGACAAGTGC	T	5595
1247_A11	csm2Δ	MMS	IV	353465	346762	SNP	1	A	2	T/A	50.6/49.4	41/40	81	T	50.617	41	A	49.383	40	AAAGTGATATGGGATTTCCT	GACCGGCGATACCGAATTCT	AAAGTGATATGGGATTTCCT	GACCGGCGATACCGAATTCT	T	26312
1247_A11	csm2Δ	MMS	IV	434223	427126	SNP	1	A	2	A/G	54.8/45.2	51/42	93	A	54.839	51	G	45.161	42	GTGTACTAATCATGCTAACG	TGACAGCGGTATCGTTGCAT	GTGTACTAATCATGCTAACG	TGACAGCGGTATCGTTGCAT	G	80758
1247_A11	csm2Δ	MMS	IV	449743	442273	SNP	1	T	2	A/T	53.1/46.9	34/30	64	A	53.125	34	T	46.875	30	TAATCAACTTTTTTAAAAAT	TAAAATACTTTTTTATTTTT	TAATCAACTTTTTTAAAAAT	TAAAATACTTTTTTATTTTT	A	15520
1247_A11	csm2Δ	MMS	IV	467528	460058	SNP	1	G	2	T/G	51.6/48.4	48/45	93	T	51.613	48	G	48.387	45	AATTCAATCTTTTATTACTG	ATCATTATTTTACAATACCC	AATTCAATCTTTTATTACTG	ATCATTATTTTACAATACCC	T	17785
1247_A11	csm2Δ	MMS	IV	602947	587603	SNP	1	A	2	T/A	51.4/48.6	36/34	70	T	51.429	36	A	48.571	34	GCTTTACCGGCTTGACCTTA	ATGGTTATTTTTTCCCGTAT	GCTTTACCGGCTTGACCTTA	ATGGTTATTTTTTCCCGTAT	T	135419
1247_A11	csm2Δ	MMS	IV	630366	615022	SNP	1	A	2	A/G	53.1/46.9	43/38	81	A	53.086	43	G	46.914	38	AAGTACGTTTTTTAACCAAG	TATATCATCCCAATATTGAT	AAGTACGTTTTTTAACCAAG	TATATCATCCCAATATTGAT	G	27419
1247_A11	csm2Δ	MMS	IV	639141	623796	SNP	1	C	2	A/C	52.7/47.3	39/35	74	A	52.703	39	C	47.297	35	ATTAAATTCAGGTCTTGCAC	CTTATCACCTTCAACATCTA	ATTAAATTCAGGTCTTGCAC	CTTATCACCTTCAACATCTA	A	8775
1247_A11	csm2Δ	MMS	IV	657128	636669	SNP	1	A	2	A/T	50.0/50.0	36/36	72	A	50	36	T	50	36	CCCCTTATTCCAGTTTAACA	ATTTTGAGTATCATCTATTT	CCCCTTATTCCAGTTTAACA	ATTTTGAGTATCATCTATTT	T	17987
1247_A11	csm2Δ	MMS	IV	698034	677572	SNP	1	C	2	C/T	52.9/47.1	45/40	85	C	52.941	45	T	47.059	40	ATAGAATGGACCTAAGCAGA	ACTCAGCAGTTAATATTTTC	ATAGAATGGACCTAAGCAGA	ACTCAGCAGTTAATATTTTC	T	40906
1247_A11	csm2Δ	MMS	IV	710743	690281	SNP	1	A	2	T/A	50.6/49.4	40/39	79	T	50.633	40	A	49.367	39	CAACTTCTGGATTGAAGAAA	ACAAGACAAACCACATAACA	CAACTTCTGGATTGAAGAAA	ACAAGACAAACCACATAACA	T	12709
1247_A11	csm2Δ	MMS	IV	755970	735508	SNP	1	C	2	T/C	54.3/45.7	51/43	94	T	54.255	51	C	45.745	43	TGGTTGAGTGTAGGAAATTG	AATCCTCTAATGAAGCTAAA	TGGTTGAGTGTAGGAAATTG	AATCCTCTAATGAAGCTAAA	T	45227
1247_A11	csm2Δ	MMS	IV	778030	757568	SNP	1	G	2	G/C	53.1/46.9	43/38	81	G	53.086	43	C	46.914	38	TGTTGCATTGCAGAACTTTG	GCTATGTACTTTCGCATCTG	TGTTGCATTGCAGAACTTTG	GCTATGTACTTTCGCATCTG	C	22060
1247_A11	csm2Δ	MMS	IV	835164	814703	SNP	1	G	2	G/C	52.2/47.8	47/43	90	G	52.222	47	C	47.778	43	AAAACTTATCGTTATCTTCC	CAGTAGATGTGTTGGAAAAA	AAAACTTATCGTTATCTTCC	CAGTAGATGTGTTGGAAAAA	C	57134
1247_A11	csm2Δ	MMS	IV	863737	843276	SNP	1	A	2	A/T	50.6/49.4	44/43	87	A	50.575	44	T	49.425	43	TGCAGGCTGTTGTGAATATA	GTTCGCAATTATTGCAGAAC	TGCAGGCTGTTGTGAATATA	GTTCGCAATTATTGCAGAAC	T	28573
1247_A11	csm2Δ	MMS	IV	867036	846575	SNP	1	A	2	A/G	52.7/47.3	39/35	74	A	52.703	39	G	47.297	35	GACATGGCCATTGCACAATG	CTTAGGATCCGAAGGTGTAT	GACATGGCCATTGCACAATG	CTTAGGATCCGAAGGTGTAT	G	3299
1247_A11	csm2Δ	MMS	IV	935211	913034	SNP	1	C	2	T/C	52.7/47.3	39/35	74	T	52.703	39	C	47.297	35	ATGACCGTTAAGAAAAACTA	TAGCCTCATCACTCCCGCAG	ATGACCGTTAAGAAAAACTA	TAGCCTCATCACTCCCGCAG	T	68175
1247_A11	csm2Δ	MMS	IV	959647	937470	SNP	1	A	2	A/T	50.0/50.0	47/47	94	A	50	47	T	50	47	GGAAGCCTGATAGTCCTTTG	TCTTCCGATATTGGCCTCTT	GGAAGCCTGATAGTCCTTTG	TCTTCCGATATTGGCCTCTT	T	24436
1247_A11	csm2Δ	MMS	IV	971291	949114	SNP	1	A	2	T/A	51.9/48.1	40/37	77	T	51.948	40	A	48.052	37	TTGAGATGTTGTAACGCTTA	AACAGAACTACGAGGTATTT	TTGAGATGTTGTAACGCTTA	AACAGAACTACGAGGTATTT	T	11644
1247_A11	csm2Δ	MMS	IV	1006455	980394	SNP	1	T	2	C/T	54.1/45.9	40/34	74	C	54.054	40	T	45.946	34	GGAAAAAAAACAGCATAAAA	CCACCCTTTTGGCTATAATA	GGAAAAAAAACAGCATAAAA	CCACCCTTTTGGCTATAATA	C	35164
1247_A11	csm2Δ	MMS	IV	1009427	983366	SNP	1	A	2	A/T	53.7/46.3	44/38	82	A	53.659	44	T	46.341	38	CAACAACAGATGAGCGCTGC	TTTTTACTGGCGATACACTA	CAACAACAGATGAGCGCTGC	TTTTTACTGGCGATACACTA	T	2972
1247_A11	csm2Δ	MMS	IV	1041738	1015677	SNP	1	G	2	A/G	53.8/46.2	42/36	78	A	53.846	42	G	46.154	36	TCGAATCTTATCAAGATTTG	TTCTTGATTTCAATAACATT	TCGAATCTTATCAAGATTTG	TTCTTGATTTCAATAACATT	A	32311
1247_A11	csm2Δ	MMS	IV	1059785	1033724	SNP	1	A	2	A/T	53.6/46.4	37/32	69	A	53.623	37	T	46.377	32	GGAAATAGCAACACAGAAGA	ACCAAGAAGGCGCACTATTT	GGAAATAGCAACACAGAAGA	ACCAAGAAGGCGCACTATTT	T	18047
1247_A11	csm2Δ	MMS	IV	1245923	1203288	SNP	1	T	2	T/A	52.5/47.5	42/38	80	T	52.5	42	A	47.5	38	TCCATATTAGATATCTGCCT	CCCCTGTATAATAGTTACTA	TCCATATTAGATATCTGCCT	CCCCTGTATAATAGTTACTA	A	186138
1247_A11	csm2Δ	MMS	IV	1262622	1219987	SNP	1	C	2	C/A	53.7/46.3	44/38	82	C	53.659	44	A	46.341	38	CAATCCACCAACGTTAAAGT	ATCATGGCTACAAACAGGGC	CAATCCACCAACGTTAAAGT	ATCATGGCTACAAACAGGGC	A	16699
1247_A11	csm2Δ	MMS	IV	1352482	1309846	SNP	1	C	2	C/T	52.3/47.7	46/42	88	C	52.273	46	T	47.727	42	AGATAGCCCTGTAGGGGGCT	GAACCCCTAACCTTATGATT	AGATAGCCCTGTAGGGGGCT	GAACCCCTAACCTTATGATT	T	89860
1247_A11	csm2Δ	MMS	IV	1375817	1333181	SNP	1	A	2	A/T	52.7/47.3	48/43	91	A	52.747	48	T	47.253	43	AAATGGCAGACTATGATGCT	ACATTAGCCATTCTTCTCAC	AAATGGCAGACTATGATGCT	ACATTAGCCATTCTTCTCAC	T	23335
1247_A11	csm2Δ	MMS	IV	1394784	1352148	SNP	1	G	2	G/T	53.9/46.1	41/35	76	G	53.947	41	T	46.053	35	TATACACTAAACAAATATCT	CATTGGTCAACCCCAAGCAC	TATACACTAAACAAATATCT	CATTGGTCAACCCCAAGCAC	T	18967
1247_A11	csm2Δ	MMS	IV	1439749	1397113	SNP	1	T	2	A/T	52.2/47.8	47/43	90	A	52.222	47	T	47.778	43	CCCTAAATTATTATAAACGA	TAAAGAGGTCTTTTCTTCAT	CCCTAAATTATTATAAACGA	TAAAGAGGTCTTTTCTTCAT	A	44965
1247_A11	csm2Δ	MMS	IV	1445534	1402898	SNP	1	G	2	G/C	51.7/48.3	46/43	89	G	51.685	46	C	48.315	43	GTAGGACGACCAATAAATCT	AATAGCGCACCAAACTGAAA	GTAGGACGACCAATAAATCT	AATAGCGCACCAAACTGAAA	C	5785
1247_A11	csm2Δ	MMS	IV	1456749	1414113	SNP	1	G	2	G/C	53.3/46.7	49/43	92	G	53.261	49	C	46.739	43	ACAGCAATCTGAAAGTTGTC	AGTTCAATTTCGTTCAACGG	ACAGCAATCTGAAAGTTGTC	AGTTCAATTTCGTTCAACGG	C	11215
1247_A11	csm2Δ	MMS	V	16925	16903	SNP	1	G	2	G/A	54.4/45.6	49/41	90	G	54.444	49	A	45.556	41	ATGGGTCTCTACACGGTAAT	TTTTGGGTTTGGAAGTGGTG	ATGGGTCTCTACACGGTAAT	TTTTGGGTTTGGAAGTGGTG	A
1247_A11	csm2Δ	MMS	V	60825	60803	SNP	1	C	2	T/C	54.7/45.3	47/39	86	T	54.651	47	C	45.349	39	GTGGAACTGCACGACAGCGC	GATCTAAGAGACCCTAGCAC	GTGGAACTGCACGACAGCGC	GATCTAAGAGACCCTAGCAC	T	43900
1247_A11	csm2Δ	MMS	V	70662	70640	SNP	1	C	2	A/C	52.8/47.2	38/34	72	A	52.778	38	C	47.222	34	CATTCATTGGGAGAACGAAC	TGTAAAAGCGGAGGACAATG	CATTCATTGGGAGAACGAAC	TGTAAAAGCGGAGGACAATG	A	9837
1247_A11	csm2Δ	MMS	V	72689	72667	SNP	1	A	2	A/T	54.7/45.3	41/34	75	A	54.667	41	T	45.333	34	CCTCCAACGCAACCAATACG	ATCCTATGCATCCACAGAGT	CCTCCAACGCAACCAATACG	ATCCTATGCATCCACAGAGT	T	2027
1247_A11	csm2Δ	MMS	V	109322	109300	SNP	1	G	2	C/G	50.7/49.3	34/33	67	C	50.746	34	G	49.254	33	TGCCTCTGCTAAAATCCATC	CAGCGTTAAATTTGACAAGT	TGCCTCTGCTAAAATCCATC	CAGCGTTAAATTTGACAAGT	C	36633
1247_A11	csm2Δ	MMS	V	201063	201033	SNP	1	A	2	G/A	50.6/49.4	39/38	77	G	50.649	39	A	49.351	38	ACAACACCAATAGCAAACAA	CCAACTACAGATATGACTTA	ACAACACCAATAGCAAACAA	CCAACTACAGATATGACTTA	G	91741
1247_A11	csm2Δ	MMS	V	230254	230224	SNP	1	A	2	A/T	51.7/48.3	45/42	87	A	51.724	45	T	48.276	42	GCAACTCGAGCGGTTCAGCT	CTATTAGTGCTCCTAACAGC	GCAACTCGAGCGGTTCAGCT	CTATTAGTGCTCCTAACAGC	T	29191
1247_A11	csm2Δ	MMS	V	231065	231035	SNP	1	A	2	A/G	50.0/50.0	45/45	90	A	50	45	G	50	45	TAATAATATCCTTAATGTAA	TAGGGGAGGCTATAACTTCA	TAATAATATCCTTAATGTAA	TAGGGGAGGCTATAACTTCA	G	811
1247_A11	csm2Δ	MMS	V	262689	262660	SNP	1	T	2	A/T	54.1/45.9	46/39	85	A	54.118	46	T	45.882	39	CACCGCCACCATTAACGAAT	TTTTATTTGATTTTGATGGT	CACCGCCACCATTAACGAAT	TTTTATTTGATTTTGATGGT	A	31624
1247_A11	csm2Δ	MMS	V	264528	264499	SNP	1	C	2	G/C	53.9/46.1	41/35	76	G	53.947	41	C	46.053	35	GCATTCTAGACAGCTTTATG	GTTACGATCCCCAATCTATG	GCATTCTAGACAGCTTTATG	GTTACGATCCCCAATCTATG	G	1839
1247_A11	csm2Δ	MMS	V	345778	345748	SNP	1	T	2	A/T	51.8/48.2	43/40	83	A	51.807	43	T	48.193	40	GTTGATTCACAGACATACAC	CTTTGTAGTACTGAGATGGG	GTTGATTCACAGACATACAC	CTTTGTAGTACTGAGATGGG	A	81250
1247_A11	csm2Δ	MMS	V	397401	397371	SNP	1	A	2	A/T	54.2/45.8	39/33	72	A	54.167	39	T	45.833	33	AGATTACCAGCCGCCTCTTT	GGTGACATGGTTATGGCCAC	AGATTACCAGCCGCCTCTTT	GGTGACATGGTTATGGCCAC	T	51623
1247_A11	csm2Δ	MMS	V	431130	431056	SNP	1	T	2	G/T	50.6/49.4	39/38	77	G	50.649	39	T	49.351	38	AATAGTGACAAAAAATAAAT	TCAGAAGGAAGGCAACATAA	AATAGTGACAAAAAATAAAT	TCAGAAGGAAGGCAACATAA	G	33729
1247_A11	csm2Δ	MMS	V	456806	451871	SNP	1	C	2	C/G	51.2/48.8	42/40	82	C	51.22	42	G	48.78	40	TGAATATACTAGACTAATGG	CAACCCCGATGATCCTGACA	TGAATATACTAGACTAATGG	CAACCCCGATGATCCTGACA	G	25676
1247_A11	csm2Δ	MMS	V	469439	464504	SNP	1	C	2	C/T	52.4/47.6	43/39	82	C	52.439	43	T	47.561	39	GTATTTGTTTCTTAAATGTT	ATCTCCAAGAAATAATTGGT	GTATTTGTTTCTTAAATGTT	ATCTCCAAGAAATAATTGGT	T	12633
1247_A11	csm2Δ	MMS	V	469457	464522	SNP	1	G	2	G/T	51.8/48.2	44/41	85	G	51.765	44	T	48.235	41	TTCATCTCCAAGAAATAATT	GTTTCGTGGTCTAGTCGGTT	TTCATCTCCAAGAAATAATT	GTTTCGTGGTCTAGTCGGTT	T	18
1247_A11	csm2Δ	MMS	V	489517	484582	SNP	1	G	2	T/G	53.2/46.8	41/36	77	T	53.247	41	G	46.753	36	GGTATCCTGTTATTATCTCC	AGTGCTGTCAATTCTTGTAC	GGTATCCTGTTATTATCTCC	AGTGCTGTCAATTCTTGTAC	T	20060
1247_A11	csm2Δ	MMS	V	513868	505298	SNP	1	C	2	A/C	51.5/48.5	50/47	97	A	51.546	50	C	48.454	47	GATAATTTGGAACAAGGGGC	GGTGAAGCCAATATAGTTGA	GATAATTTGGAACAAGGGGC	GGTGAAGCCAATATAGTTGA	A	24351
1247_A11	csm2Δ	MMS	V	540822	532252	SNP	1	C	2	C/A	54.8/45.2	63/52	115	C	54.783	63	A	45.217	52	GATCAGTTTCTAAACATTAG	AAATTATTCTAGGTGGTATA	GATCAGTTTCTAAACATTAG	AAATTATTCTAGGTGGTATA	A	26954
1247_A11	csm2Δ	MMS	VI	33776	33418	SNP	1	G	2	G/A	50.5/49.5	53/52	105	G	50.476	53	A	49.524	52	TGATCCTGAATATCACCTAA	TATAAAGCAATATCTCCCCT	TGATCCTGAATATCACCTAA	TATAAAGCAATATCTCCCCT	A
1247_A11	csm2Δ	MMS	VI	37723	37365	SNP	1	C	2	A/C	52.2/47.8	48/44	92	A	52.174	48	C	47.826	44	GCAATTGTTCCTGGTCAAAG	ATTAGTGGAACATTGGAACT	GCAATTGTTCCTGGTCAAAG	ATTAGTGGAACATTGGAACT	A	3947
1247_A11	csm2Δ	MMS	VI	45291	44933	SNP	1	T	2	C/T	54.1/45.9	46/39	85	C	54.118	46	T	45.882	39	GTGCTCTTCAGCACCCTCTT	GGTTTGGGTTGTGGTGGTGG	GTGCTCTTCAGCACCCTCTT	GGTTTGGGTTGTGGTGGTGG	C	7568
1247_A11	csm2Δ	MMS	VI	56953	56595	SNP	1	A	2	C/A	52.2/47.8	35/32	67	C	52.239	35	A	47.761	32	TTCTGTATCGATAACGAAGC	CTTTATGACATCTGTCAAAG	TTCTGTATCGATAACGAAGC	CTTTATGACATCTGTCAAAG	C	11662
1247_A11	csm2Δ	MMS	VI	89850	89491	SNP	1	C	2	C/G	55.0/45.0	44/36	80	C	55	44	G	45	36	TAAAAAGGTCTCATCTCTTT	ATCCATATTGTAGTTGGTAC	TAAAAAGGTCTCATCTCTTT	ATCCATATTGTAGTTGGTAC	G	32897
1247_A11	csm2Δ	MMS	VI	93242	92886	SNP	1	A	2	A/G	53.0/47.0	44/39	83	A	53.012	44	G	46.988	39	ACAGACGGTTGAAAGAAGCT	CCGCGTCGAAATGGCAATCA	ACAGACGGTTGAAAGAAGCT	CCGCGTCGAAATGGCAATCA	G	3392
1247_A11	csm2Δ	MMS	VI	101473	101119	SNP	1	C	2	C/T	54.3/45.7	38/32	70	C	54.286	38	T	45.714	32	CCTGGGTTCAATTCCCAGCT	GCCCCCTTTTTTTTGCATAT	CCTGGGTTCAATTCCCAGCT	GCCCCCTTTTTTTTGCATAT	T	8231
1247_A11	csm2Δ	MMS	VI	158017	152750	SNP	1	T	2	A/T	50.5/49.5	49/48	97	A	50.515	49	T	49.485	48	GCTAAATCCGCTTCTATTTA	GAAAAATTCATTGTTACAGG	GCTAAATCCGCTTCTATTTA	GAAAAATTCATTGTTACAGG	A	56544
1247_A11	csm2Δ	MMS	VI	162425	157158	SNP	1	C	2	A/C	52.9/47.1	45/40	85	A	52.941	45	C	47.059	40	GTAAGCTAGCTAAGACTAGT	GTTTTGAAGCGCTAAAACGT	GTAAGCTAGCTAAGACTAGT	GTTTTGAAGCGCTAAAACGT	A	4408
1247_A11	csm2Δ	MMS	VI	176831	171564	SNP	1	G	2	T/G	53.4/46.6	39/34	73	T	53.425	39	G	46.575	34	CGCAGGTGGCTTTTGCCTTT	CCGTACCGATCGGGAAATTG	CGCAGGTGGCTTTTGCCTTT	CCGTACCGATCGGGAAATTG	T	14406
1247_A11	csm2Δ	MMS	VI	223611	218345	SNP	1	A	2	A/G	53.5/46.5	38/33	71	A	53.521	38	G	46.479	33	AGGTAATTGAACGTTCGAGA	AGAGCGTTCGCTATAAGTTC	AGGTAATTGAACGTTCGAGA	AGAGCGTTCGCTATAAGTTC	G	46780
1247_A11	csm2Δ	MMS	VI	229753	224487	SNP	1	C	2	G/C	51.3/48.7	39/37	76	G	51.316	39	C	48.684	37	CTCCGAGATGGATACCAAGA	GGTTTCTTTAAAACTTAAGA	CTCCGAGATGGATACCAAGA	GGTTTCTTTAAAACTTAAGA	G	6142
1247_A11	csm2Δ	MMS	VI	238848	233582	SNP	1	C	2	G/C	52.2/47.8	47/43	90	G	52.222	47	C	47.778	43	ATTGGTGCAAACTTTTTAAA	GTAAGGGCGTAAAGGAAAGA	ATTGGTGCAAACTTTTTAAA	GTAAGGGCGTAAAGGAAAGA	G	9095
1247_A11	csm2Δ	MMS	VI	246687	241422	SNP	1	G	2	G/A	54.1/45.9	53/45	98	G	54.082	53	A	45.918	45	TTCCTTCGATCGGCTACCTC	ATACTCAAAAGAAAAGTCCA	TTCCTTCGATCGGCTACCTC	ATACTCAAAAGAAAAGTCCA	A	7839
1247_A11	csm2Δ	MMS	VI	268870	263604	SNP	1	A	2	A/T	54.7/45.3	52/43	95	A	54.737	52	T	45.263	43	AGATCCACCATATGGAAGAA	AATACGAGAGTTAAAATGCT	AGATCCACCATATGGAAGAA	AATACGAGAGTTAAAATGCT	T	22183
1247_A11	csm2Δ	MMS	VII	11150	4755	SNP	1	T	2	G/T	51.1/48.9	47/45	92	G	51.087	47	T	48.913	45	TACTTTTTTCAGCGTCCTTA	TTCTGTTGCAACAACCGTCA	TACTTTTTTCAGCGTCCTTG	TTCTGTTGCAACAGCCATCA	G
1247_A11	csm2Δ	MMS	VII	49261	42869	SNP	1	A	2	G/A	54.4/45.6	37/31	68	G	54.412	37	A	45.588	31	AAGATACACATCTGAGAGGC	TAAGGCTATATGTTCCATCT	AAGATACACATCTGAGAGGC	TAAGGCTATATGTTCCATCT	G	38111
1247_A11	csm2Δ	MMS	VII	111064	104674	SNP	1	G	2	T/G	51.2/48.8	42/40	82	T	51.22	42	G	48.78	40	GGTACATATATGAGGAATAT	AGTCGTCACATCAATGTATA	GGTACATATATGAGGAATAT	AGTCGTCACATCAATGTATA	T	61803
1247_A11	csm2Δ	MMS	VII	122938	116548	SNP	1	T	2	A/T	52.4/47.6	43/39	82	A	52.439	43	T	47.561	39	TGGTGTTTGGGTCGTCCAAA	CCACATATACCACCCCATGA	TGGTGTTTGGGTCGTCCAAA	CCACATATACCACCCCATGA	A	11874
1247_A11	csm2Δ	MMS	VII	178000	171610	SNP	1	C	2	A/C	53.6/46.4	45/39	84	A	53.571	45	C	46.429	39	TGATGTACTCTTTTTCGACA	AATGATTGTGTTCAATATCA	TGATGTACTCTTTTTCGACA	AATGATTGTGTTCAATATCA	A	55062
1247_A11	csm2Δ	MMS	VII	264607	258217	SNP	1	C	2	C/A	51.7/48.3	45/42	87	C	51.724	45	A	48.276	42	ATATTCCTAAGTATTGAAAC	AGCAATTTTCGGTATTATAA	ATATTCCTAAGTATTGAAAC	AGCAATTTTCGGTATTATAA	A	86607
1247_A11	csm2Δ	MMS	VII	304972	298576	SNP	1	C	2	A/C	53.2/46.8	41/36	77	A	53.247	41	C	46.753	36	TTTTTGACCCCACTGTAAAA	GTTATGATTTCTTGAAGCTT	TTTTTGACCCCACTGTAAAA	GTTATGATTTCTTGAAGCTT	A	40365
1247_A11	csm2Δ	MMS	VII	321544	315148	SNP	1	C	2	A/C	51.2/48.8	21/20	41	A	51.22	21	C	48.78	20	AGATAGCTATCTAGCAATTC	CTTCTTTTTCAATCGTTGGG	AGATAGCTATCTAGCAATTC	CTTCTTTTTCAATCGTTGGG	A	16572
1247_A11	csm2Δ	MMS	VII	332471	326077	SNP	1	A	2	A/T	52.1/47.9	38/35	73	A	52.055	38	T	47.945	35	GAGGGTAGAAGTTTGACGGT	GTGTCGTAGTGATCACAGCT	GAGGGTAGAAGTTTGACGGT	GTGTCGTAGTGATCACAGCT	T	10927
1247_A11	csm2Δ	MMS	VII	336548	330154	SNP	1	A	2	A/G	53.3/46.7	48/42	90	A	53.333	48	G	46.667	42	AGTATTTTTCCTCGGATGAG	AAATGAAGCAATTGATGAGG	AGTATTTTTCCTCGGATGAG	AAATGAAGCAATTGATGAGG	G	4077
1247_A11	csm2Δ	MMS	VII	367642	361248	SNP	1	T	2	G/T	50.6/49.4	39/38	77	G	50.649	39	T	49.351	38	CTGCTTAACAGCTTGATAGG	GATTCAGTAAGCTTCTTCCT	CTGCTTAACAGCTTGATAGG	GATTCAGTAAGCTTCTTCCT	G	31094
1247_A11	csm2Δ	MMS	VII	376198	369804	SNP	1	A	2	A/T	53.0/47.0	53/47	100	A	53	53	T	47	47	CAAAAAATCATTGAACCATG	CTCTACCGTTTTTATCCCAT	CAAAAAATCATTGAACCATG	CTCTACCGTTTTTATCCCAT	T	8556
1247_A11	csm2Δ	MMS	VII	449103	442710	SNP	1	G	2	G/A	51.9/48.1	41/38	79	G	51.899	41	A	48.101	38	TGAGCTCCCATTGAGTATGC	TTCCCCATGGGAGACATCAT	TGAGCTCCCATTGAGTATGC	TTCCCCATGGGAGACATCAT	A	72905
1247_A11	csm2Δ	MMS	VII	450498	444105	SNP	1	G	2	G/T	54.4/45.6	37/31	68	G	54.412	37	T	45.588	31	TGTTATCCTCGTTCGTGTTT	CGTTATGGTTCGTGGTTGAA	TGTTATCCTCGTTCGTGTTT	CGTTATGGTTCGTGGTTGAA	T	1395
1247_A11	csm2Δ	MMS	VII	479607	473214	SNP	1	T	2	T/A	54.0/46.0	47/40	87	T	54.023	47	A	45.977	40	ATCCAGAGAAACCAATTATA	CAAATCAAATAAAACAACCA	ATCCAGAGAAACCAATTATA	CAAATCAAATAAAACAACCA	A	29109
1247_A11	csm2Δ	MMS	VII	1079045	1052057	SNP	1	G	2	T/G	51.8/48.2	57/53	110	T	51.818	57	G	48.182	53	TATTAAGCAAAAGAAAATAA	CGCATAAGATTCTTGCTACT	TATTAAGCAAAAGAAAATAA	CGCATAAGATTCTTGCTACT	T	599438
1247_A11	csm2Δ	MMS	VIII	62743	62744	SNP	1	G	2	A/G	51.0/49.0	50/48	98	A	51.02	50	G	48.98	48	TCATTCACCATCGAATCATT	TAAAATCATATGCCATCTTA	TCATTCACCATCGAATCATT	TAAAATCATATGCCATCTTA	A
1247_A11	csm2Δ	MMS	VIII	116462	110269	SNP	1	T	2	T/A	50.4/49.6	57/56	113	T	50.442	57	A	49.558	56	GATAATTGTTGGGATTCCAT	TTTGATAAAGGCTATAATAT	GATAATTGTTGGGATTCCAT	TTTGATAAAGGCTATAATAT	A	53719
1247_A11	csm2Δ	MMS	VIII	140056	133852	SNP	1	A	2	T/A	50.6/49.4	41/40	81	T	50.617	41	A	49.383	40	TCCAATTGCTTCAATACAGC	GATTTAGCGGTTCCACCAGT	TCCAATTGCTTCAATACAGC	GATTTAGCAGTGCCACCAGT	T	23594
1247_A11	csm2Δ	MMS	VIII	182149	175945	SNP	1	C	2	C/G	53.6/46.4	37/32	69	C	53.623	37	G	46.377	32	GATGAAATTCAAAAGTTCTT	TTTAGAAGTGCCACTGGTCA	GATGAAATTCAAAAGTTCTT	TTTAGAAGTGCCACTGGTCA	G	42093
1247_A11	csm2Δ	MMS	VIII	237943	229839	SNP	1	C	2	C/A	52.5/47.5	32/29	61	C	52.459	32	A	47.541	29	AACTGAGCTAAATCCGCTTA	TATTTGTTGAAATTCTGATG	AACTGAGCTAAATCCGCTTA	TATTTGTTGAAATTCTGATG	A	55794
1247_A11	csm2Δ	MMS	VIII	285133	277029	SNP	1	C	2	A/C	51.4/48.6	36/34	70	A	51.429	36	C	48.571	34	GAAAAATCTGCGTGTATTAG	ATGTCCGTCGTAAAGTCGCT	GAAAAATCTGCGTGTATTAG	ATGTCCGTCGTAAAGTCGCT	A	47190
1247_A11	csm2Δ	MMS	VIII	326641	318536	SNP	1	T	2	T/C	53.0/47.0	35/31	66	T	53.03	35	C	46.97	31	GAGTAACGTGAAAAAACCGG	TTATTTTTGTTTTTACTGTT	GAGTAACGTGAAAAAACCGG	TTATTTTTGTTTTTACTGTT	C	41508
1247_A11	csm2Δ	MMS	VIII	327601	319496	SNP	1	C	2	C/G	52.3/47.7	45/41	86	C	52.326	45	G	47.674	41	GGGCCTGATGAAGTACAGAA	GGCATGAACTCTCAAGTCAA	GGGCCTGATGAAGTACAGAA	GGCATGAACTCTCAAGTCAA	G	960
1247_A11	csm2Δ	MMS	VIII	352482	344377	SNP	1	A	2	A/T	51.5/48.5	35/33	68	A	51.471	35	T	48.529	33	TACAACTATTAATTGTATAT	ATTTGACATGTAATATAATA	TACAACTATTAATTGTATAT	ATTTGACATGTAATATAATA	T	24881
1247_A11	csm2Δ	MMS	VIII	388918	380814	SNP	1	G	2	A/G	54.1/45.9	40/34	74	A	54.054	40	G	45.946	34	GAGCTGGGAATTGAACCCAG	GCCTCTCGCATGCTTTGTCT	GAGCTGGGAATTGAACCCAG	GCCTCTCGCATGCTTTGTCT	A	36436
1247_A11	csm2Δ	MMS	IX	60907	44680	SNP	1	A	2	T/A	51.6/48.4	33/31	64	T	51.562	33	A	48.438	31	GATTGATTCCCTATATTGCA	CCAAAATCACTCAATTTTTC	GATTGATTCCCTATATTGCA	CCAAAATCACTCAATTTTTC	T
1247_A11	csm2Δ	MMS	IX	93437	77210	SNP	1	G	2	G/A	53.5/46.5	38/33	71	G	53.521	38	A	46.479	33	CGCAGGAGCACAAGCTCGCC	GTGGCCCGTGTGGGTTAAGG	CGCAGGAGCACAAGCTCGCC	GTGGCCCGTGTGGGTTAAGG	A	32530
1247_A11	csm2Δ	MMS	IX	99403	83176	SNP	1	G	2	T/G	50.6/49.4	40/39	79	T	50.633	40	G	49.367	39	TACCATCAATGACAACAACT	GTTCAACAGACATTTTCTCG	TACCATCAATGACAACAACT	GTTCAACAGACATTTTCTCG	T	5966
1247_A11	csm2Δ	MMS	IX	119279	102518	SNP	1	C	2	T/C	53.8/46.2	50/43	93	T	53.763	50	C	46.237	43	AAAACGAAGCAAAAATTCTT	ATGGTGAGGAAGTCCAACCA	AAAACGAAGCAAAAATTCTT	ATGGTGAGGAAGTCCAACCA	T	19876
1247_A11	csm2Δ	MMS	IX	147659	130898	SNP	1	C	2	C/T	53.2/46.8	50/44	94	C	53.191	50	T	46.809	44	ATCAACACCGGAACAAGGTT	TAGAATAGTGCCTGAAGTAA	ATCAACACCGGAACAAGGTT	TAGAATAGTGCCTGAAGTAA	T	28380
1247_A11	csm2Δ	MMS	IX	172878	156117	SNP	1	T	2	A/T	51.3/48.7	39/37	76	A	51.316	39	T	48.684	37	AGACTGTCCATCGATTGGGG	TATGCCTTCAATAAACCACT	AGACTGTCCATCGATTGGGG	TATGCCTTCAATAAACCACT	A	25219
1247_A11	csm2Δ	MMS	IX	248928	232167	SNP	1	G	2	A/G	50.6/49.4	40/39	79	A	50.633	40	G	49.367	39	CTGGTTCAAATCCTGCTGGT	TCGTTATTTTTTTATTTTTA	CTGGTTCAAATCCTGCTGGT	TCGTTATTTTTTTATTTTTA	A	76050
1247_A11	csm2Δ	MMS	IX	250141	233380	SNP	1	C	2	C/A	54.2/45.8	45/38	83	C	54.217	45	A	45.783	38	TGGAGCTGATAGACAAATTC	AACTAAGTCAATATAAGGCA	TGGAGCTGATAGACAAATTC	AACTAAGTCAATATAAGGCA	A	1213
1247_A11	csm2Δ	MMS	IX	300284	283523	SNP	1	G	2	C/G	52.7/47.3	48/43	91	C	52.747	48	G	47.253	43	TAAGAGTCATACGCGCTACC	ATTGCGCCAACAAGGCTATT	TAAGAGTCATACGCGCTACC	ATTGCGCCAACAAGGCTATT	C	50143
1247_A11	csm2Δ	MMS	IX	355814	339053	SNP	1	C	2	C/G	54.8/45.2	23/19	42	C	54.762	23	G	45.238	19	GTAATGAAAACAGGTGTTAT	CCAAAAAAAAAAATTGATAT	GTAATGAAAACAGGTGTTAT	CAAAAAAAAAAATTGATATA	G	55530
1247_A11	csm2Δ	MMS	IX	375909	359148	SNP	1	C	2	G/C	52.8/47.2	38/34	72	G	52.778	38	C	47.222	34	CTACCATCCGATGAATGCAC	AACTCCTGCAATGATACCAT	CTACCATCCGATGAATGCAC	AACTCCTGCAATGATACCAT	G	20095
1247_A11	csm2Δ	MMS	IX	390523	373762	SNP	1	T	2	T/A	50.6/49.4	40/39	79	T	50.633	40	A	49.367	39	GTTGTAATTTCACCACCTGG	TTTGTACTAGTAGAATACTC	GTTGTAATTTCACCACCTGG	TTTGTACTAGTAGAATACTC	A	14614
1247_A11	csm2Δ	MMS	X	22442	8196	SNP	1	T	2	C/T	50.0/50.0	38/38	76	C	50	38	T	50	38	TATAGGTAAAAACTCCGTGA	TGCCGCCGGTAGTGTTGTGA	TATAGGTAAAAACTCCGTGA	TGCCGCCGGTAGTGTTGTGA	C
1247_A11	csm2Δ	MMS	X	51311	37065	SNP	1	T	2	T/C	54.3/45.7	44/37	81	T	54.321	44	C	45.679	37	TATTTTTATCGATAATTTTT	TGGGAATCAATTCGTTCTTG	TATTTTTATCGATAATTTTT	TGGGAATCAATTCGTTCTTG	C	28869
1247_A11	csm2Δ	MMS	X	59928	45682	SNP	1	G	2	T/G	50.6/49.4	45/44	89	T	50.562	45	G	49.438	44	AAGCTGAGAGTTGTGAACTC	CCACCTCTGTTAAGTAAGTC	AAGCTGAGAGTTGTGAACTC	CCACCTCTGTTAAGTAAGTC	T	8617
1247_A11	csm2Δ	MMS	X	97752	83505	SNP	1	G	2	G/A	51.3/48.7	39/37	76	G	51.316	39	A	48.684	37	ACATTATGATCGCCTTACCA	TAGAGAAGGCCCCTAGAAAG	ACATTATGATCGCCTTACCA	TAGAGAAGGCCCCTAGAAAG	A	37824
1247_A11	csm2Δ	MMS	X	108459	94212	SNP	1	T	2	T/A	51.2/48.8	44/42	86	T	51.163	44	A	48.837	42	GTCACCATCATCGCCGCTGT	TACAGAAGCGTCAGCATCCT	GTCACCATCATCGCCGCTGT	TACAGAAGCGTCAGCATCCT	A	10707
1247_A11	csm2Δ	MMS	X	132339	118092	SNP	1	T	2	T/A	53.8/46.3	43/37	80	T	53.75	43	A	46.25	37	ATGAATCAAATGTGCCAACT	TTCCTGTATTGGGTCCAGTA	ATGAATCAAATGTGCCAACT	TTCCTGTATTGGGTCCAGTA	A	23880
1247_A11	csm2Δ	MMS	X	198745	184498	SNP	1	C	2	C/G	54.0/46.0	27/23	50	C	54	27	G	46	23	TAAATGCTGCCAAGATTGTC	TAATCTAAAGGATTACCTAC	TAAATGCTGCCAAGATTGTC	TAATCTAAAGGATTACCTAC	G	66406
1247_A11	csm2Δ	MMS	X	250417	236170	SNP	1	G	2	T/G	50.6/49.4	43/42	85	T	50.588	43	G	49.412	42	TAGATAAGCCAATCACTGAA	GAATAGCTTCACCAACATCT	TAGATAAGCCAATCACTGAA	GAATAGCTTCACCAACATCT	T	51672
1247_A11	csm2Δ	MMS	X	271154	256907	SNP	1	G	2	G/T	51.9/48.1	41/38	79	G	51.899	41	T	48.101	38	ACACATTTGATTTCTTTTTT	GATAATAGTTCCAATGATTT	ACACATTTGATTTCTTTTTT	GATAATAGTTCCAATGATTT	T	20737
1247_A11	csm2Δ	MMS	X	301828	287582	SNP	1	A	2	T/A	52.3/47.7	45/41	86	T	52.326	45	A	47.674	41	TTTGCTCAATTATAGATTTG	TCTCTTTCAAAGTTGCACTA	TTTGCTCAATTATAGATTTG	TCTCTTTCAAAGTTGCACTA	T	30674
1247_A11	csm2Δ	MMS	X	332943	318697	SNP	1	T	2	G/T	51.9/48.1	41/38	79	G	51.899	41	T	48.101	38	AGGTCAGGTTGTTGTAGTTA	GGATGTGCCCGTGGACAATG	AGGTCAGGTTGTTGTAGTTA	GGATGTGCCCGTGGACAATG	G	31115
1247_A11	csm2Δ	MMS	X	372688	357942	SNP	1	G	2	G/A	53.5/46.5	46/40	86	G	53.488	46	A	46.512	40	CTGGGTTGTAGGTAGAATTC	TCGTTTGACTGAAAATTTTT	CTGGGTTGTAGGTAGAATTC	TCGTTTGACTGAAAATTTTT	A	39745
1247_A11	csm2Δ	MMS	X	377997	363251	SNP	1	A	2	T/A	53.5/46.5	53/46	99	T	53.535	53	A	46.465	46	TGGACAATTAGTTGACATAA	CTACGTTACTAATTTTTGTT	TGGACAATTAGTTGACATAA	CTACGTTACTAATTTTTGTT	T	5309
1247_A11	csm2Δ	MMS	X	400614	385867	SNP	1	T	2	G/T	53.8/46.3	43/37	80	G	53.75	43	T	46.25	37	TCAATATCATGTGATACTTC	GCAGTACGGTGGGAGATTGG	TCAATATCATGTGATACTTC	GCAGTACGGTGGGAGATTGG	G	22617
1247_A11	csm2Δ	MMS	X	409389	394642	SNP	1	C	2	G/C	52.9/47.1	37/33	70	G	52.857	37	C	47.143	33	TTTAATATAGAAGTATCATT	GTTAAATAATCATTATATCA	TTTAATATAGAAGTATCATT	GTTAAATAATCATTATATCA	G	8775
1247_A11	csm2Δ	MMS	X	428069	413322	SNP	1	C	2	C/T	50.0/50.0	40/40	80	C	50	40	T	50	40	AACAAACTAAATTTTATAGG	GACTTATCGGAAATGACAGA	AACAAACTAAATTTTATAGG	GACTTATCGGAAATGACAGA	T	18680
1247_A11	csm2Δ	MMS	X	496441	476113	SNP	1	T	2	A/T	53.8/46.2	35/30	65	A	53.846	35	T	46.154	30	TGGGGCGTCCTGGAAGAAAG	TCAATGACATGAGAACTACC	TGGGGCGTCCTGGAAGAAAG	TCAATGACATGAGAACTACC	A	68372
1247_A11	csm2Δ	MMS	X	504123	483795	SNP	1	G	2	C/G	53.3/46.7	49/43	92	C	53.261	49	G	46.739	43	GGTAGAACAAGATGAAGCGC	CAAGAAGTTAAGACTTAGGA	GGTAGAACAAGATGAAGCGC	CAAGAAGTTAAGACTTAGGA	C	7682
1247_A11	csm2Δ	MMS	X	545322	524994	SNP	1	G	2	T/G	51.3/48.8	41/39	80	T	51.25	41	G	48.75	39	TATCCGAAACTGTTCTATGC	TGCAAAATGATATGTCTTGC	TATCCGAAACTGTTCTATGC	TGCAAAATGATATGTCTTGC	T	41199
1247_A11	csm2Δ	MMS	X	557525	537197	SNP	1	A	2	G/A	53.2/46.8	59/52	111	G	53.153	59	A	46.847	52	TTATTGGCAAAAAGCAGCAA	TTCTTTTAGCTACTCAATTA	TTATTGGCAAAAAGCAGCAA	TTCTTTTAGCTACTCAATTA	G	12203
1247_A11	csm2Δ	MMS	X	584034	563706	SNP	1	C	2	C/T	53.0/47.0	44/39	83	C	53.012	44	T	46.988	39	CAGAATAGTAGAAAGAGAAA	CAATTGGATAATTTATCCGC	CAGAATAGTAGAAAGAGAAA	CAATTGGATAATTTATCCGC	T	26509
1247_A11	csm2Δ	MMS	X	741849	714728	SNP	1	A	2	A/T	51.4/48.6	71/67	138	A	51.449	71	T	48.551	67	ATCAACGGTAAAAACAGTGA	GCTGGTCCTGTTGTAGAATC	ATCAACGGTAAAAACAGTGA	GCTGGTCCTGTTGTAGAATC	T	157815
1247_A11	csm2Δ	MMS	XI	618160	617922	SNP	1	C	2	C/A	50.5/49.5	47/46	93	C	50.538	47	A	49.462	46	AGATGGTTCAATGATACCAC	TCTTAATCTCAAGACCAAAT	AGATGGTTCAATGATACCAC	TCTTAATCTCAAGACCAAAT	A
1247_A11	csm2Δ	MMS	XI	659122	658885	SNP	1	G	2	T/G	54.7/45.3	52/43	95	T	54.737	52	G	45.263	43	GAAGCTGTGCACTCATGAGC	ATGCTTGTAGAGCAAATCCA	GAAGCTGTGCACTCATGAGC	ATGCTTGTAGAGCAAATCCA	T	40962
1247_A11	csm2Δ	MMS	XII	23617	16732	SNP	1	G	2	T/G	52.2/47.8	48/44	92	T	52.174	48	G	47.826	44	TTCCCAGCAATCTAGACTAT	CTGTTTCTTTTGGCATTCCT	TTCCCAGCAATCTAGACTAT	CTGTTTCTTTTGGCATTCCT	T
1247_A11	csm2Δ	MMS	XII	38080	31195	SNP	1	T	2	T/A	54.1/45.9	53/45	98	T	54.082	53	A	45.918	45	CATCTCCGGTTATATTTGGG	ATGATTACTTTAAACATTTC	CATCTCCGGTTATATTTGGG	ATGATTACTTTAAACATTTC	A	14463
1247_A11	csm2Δ	MMS	XII	45752	38867	SNP	1	T	2	A/T	52.2/47.8	48/44	92	A	52.174	48	T	47.826	44	TTCTACCAAACCAGTAATCG	ACCTTGTTGGGTGAACTCTG	TTCTACCAAACCAGTAATCG	ACCTTGTTGGGTGAACTCTG	A	7672
1247_A11	csm2Δ	MMS	XII	57750	50867	SNP	1	T	2	C/T	51.2/48.8	43/41	84	C	51.19	43	T	48.81	41	TCTGGCCTCACAAACAATTC	ATTATGCACATTATTTCTTG	TCTGGCCTCACAAACAATTC	ATTATGCACATTATTTCTTG	C	11998
1247_A11	csm2Δ	MMS	XII	59407	52524	SNP	1	A	2	A/G	50.5/49.5	48/47	95	A	50.526	48	G	49.474	47	GTGACGCCCTTTGTCTTGTT	TATAAAGTAAGGGCAATCTT	GTGACGCCCTTTGTCTTGTT	TATAAAGTAAGGGCAATCTT	G	1657
1247_A11	csm2Δ	MMS	XII	120030	113146	SNP	1	C	2	T/C	53.3/46.7	48/42	90	T	53.333	48	C	46.667	42	TTTTGTCTTCAACTTTAGAT	AACGAATAGATGGTTATCCG	TTTTGTCTTCAACTTTAGAT	AACGAATAGATGGTTATCCG	T	60623
1247_A11	csm2Δ	MMS	XII	123821	116939	SNP	1	T	2	T/C	55.0/45.0	44/36	80	T	55	44	C	45	36	TAGGGGGGGAAATTGTTATT	GCAGGCCCATCTTGTTGGTT	TAGGGGGGGAAATTGTTATT	GCAGGCCCATCTTGTTGGTT	C	3791
1247_A11	csm2Δ	MMS	XII	159902	153013	SNP	1	C	2	G/C	54.9/45.1	50/41	91	G	54.945	50	C	45.055	41	GAAGTTCGAGATACTCCGCA	AGGGTCTGGGTGGTAGGTTT	GAAGTTCGAGATACTCCGCA	AGGGTCTGGGTGGTAGGTTT	G	36081
1247_A11	csm2Δ	MMS	XII	174288	167400	SNP	1	T	2	C/T	51.1/48.9	45/43	88	C	51.136	45	T	48.864	43	TAGTTGCCGTGAAGACTAAT	TCGCAAAGGAAATACCCGAT	TAGTTGCCGTGAAGACTAAT	TCGCAAAGGAAATACCCGAT	C	14386
1247_A11	csm2Δ	MMS	XII	184818	177930	SNP	1	G	2	G/T	54.0/46.0	47/40	87	G	54.023	47	T	45.977	40	AATTCCTTTTCGATAGTCTT	GACCTTATTTTGGTAGCACG	AATTCCTTTTCGATAGTCTT	GACCTTATTTTGGTAGCACG	T	10530
1247_A11	csm2Δ	MMS	XII	194194	187307	SNP	1	A	2	A/G	53.8/46.3	43/37	80	A	53.75	43	G	46.25	37	TGAGCAGAGTAACGACAACG	TGGAGTTCCGTAACTAACCA	TGAGCGGAGTAACGACAACG	TGGAGTTCCGTAACTAACCA	G	9376
1247_A11	csm2Δ	MMS	XII	195327	188437	SNP	1	G	2	G/A	51.9/48.1	28/26	54	G	51.852	28	A	48.148	26	TTTTTTTTTTGCGTTCATAG	TATAGAAGGGAATGTGCATT	#NAME?	TATAGAAGGGAATGTGCATT	A	1133
1247_A11	csm2Δ	MMS	XII	438188	427485	SNP	1	A	2	A/T	50.0/50.0	47/47	94	A	50	47	T	50	47	TCTCCTTACCCTGAATGAAC	TCGTCTCTTGTATGGATGAG	TCTCCTTACCCTGAATGAAC	TCGTCTCTTGTATGGATGAG	T	242861
1247_A11	csm2Δ	MMS	XII	599467	551575	SNP	1	G	2	G/C	54.3/45.7	50/42	92	G	54.348	50	C	45.652	42	TATTCTCCTGGCACATTAAC	TATGCCCACTATTAGTGCCT	TATTCTCCTGGCACATTAAC	TATGCCCACTATTATTGCCT	C	161279
1247_A11	csm2Δ	MMS	XIII	26212	21179	SNP	1	G	2	T/G	52.4/47.6	55/50	105	T	52.381	55	G	47.619	50	GTCGCTAATTTCCGCCCCAC	TGCTGGAAATAACACGTCCA	GTCGCTAATTTCCGCCCCAC	TGCTGGAAATAACACGTCCA	T
1247_A11	csm2Δ	MMS	XIII	62077	57050	SNP	1	T	2	A/T	51.4/48.6	36/34	70	A	51.429	36	T	48.571	34	CCAATTTGCGCGTTCCCATC	TGTATTAAACCCTCGACAGA	CCAATTTGCGCGTTCCCATC	TGTATTAAACCCTCGACAGA	A	35865
1247_A11	csm2Δ	MMS	XIII	93680	88646	SNP	1	T	2	A/T	51.2/48.8	43/41	84	A	51.19	43	T	48.81	41	TTGAACACGGAGCTGCAATA	TATGATGAAGATGAAGACCT	TTGAACACGGAGCTGCAATA	TATGATGAAGATGAAGACCT	A	31603
1247_A11	csm2Δ	MMS	XIII	336594	322009	SNP	1	C	2	C/G	50.7/49.3	36/35	71	C	50.704	36	G	49.296	35	CAGAATCAAGTTCTTCTAAT	CAACGGATTTTAGCCACATC	CAGAATCAAGTTCTTCTAAT	CAACGGATTTTAGCCACATC	G	242914
1247_A11	csm2Δ	MMS	XIII	345377	330792	SNP	1	C	2	A/C	53.0/47.0	44/39	83	A	53.012	44	C	46.988	39	AGTGGATGTGCCCAAATTAT	GTTGAAGTTCATATTATATT	AGTGGATGTGCCCAAATTAT	GTTGAAGTTCATATTATATT	A	8783
1247_A11	csm2Δ	MMS	XIII	346718	332133	SNP	1	G	2	G/C	53.7/46.3	22/19	41	G	53.659	22	C	46.341	19	TTTTTTTTTTTGAACTTTTC	TATTACAGACTAGTTTCTGT	TTTTTTTTTTTGAACTTTTC	TATTACAGACTAGTTTCTGT	C	1341
1247_A11	csm2Δ	MMS	XIII	350148	335563	SNP	1	T	2	T/C	51.4/48.6	36/34	70	T	51.429	36	C	48.571	34	ATTGACGAGATCGAGATACG	CTGCTGTGTTTAACGGCTAA	ATTGACGAGATCGAGATACG	CTGCTGTGTTTAACGGCTAA	C	3430
1247_A11	csm2Δ	MMS	XIII	351816	337231	SNP	1	T	2	T/C	54.4/45.6	56/47	103	T	54.369	56	C	45.631	47	GGCCATAGTAGGGAGAAGTG	CAATTGCATTGATACCATGC	GGCCATAGTAGGGAGAAGTG	CAATTGCATTGATACCATGC	C	1668
1247_A11	csm2Δ	MMS	XIII	394864	376234	SNP	1	A	2	A/T	50.0/50.0	39/39	78	A	50	39	T	50	39	TAGGCGAACCTCTGTATGTA	TTAAGTAAAAAAAAAACGAT	TAGGCGAACCTCTGTATGTA	TTAAGTAAAAAAAAAACGAT	T	43048
1247_A11	csm2Δ	MMS	XIII	397769	379139	SNP	1	A	2	A/T	50.0/50.0	47/47	94	A	50	47	T	50	47	GATAGTCTGATTGCTCCAGA	GTGACATATAGAGGGTTCAT	GATAGTCTGATTGCTCCAGA	GTGACATATAGAGGGTTCAT	T	2905
1247_A11	csm2Δ	MMS	XIII	447548	428919	SNP	1	A	2	A/G	50.0/50.0	31/31	62	A	50	31	G	50	31	AAGTTAGTCCTATCTGGAAT	AGTTAACATTTTTCGATACA	AAGTTAGTCCTATCTGGAAT	AGTTAACATTTTTCGATACA	G	49779
1247_A11	csm2Δ	MMS	XIII	485516	466887	SNP	1	A	2	A/G	53.2/46.8	41/36	77	A	53.247	41	G	46.753	36	TAAACCACAGACGGTTATAA	GAAACTATCCAAGGTTGCCA	TAAACCACAGACGGTTATAA	GAAACTATCCAAGGTTGCCA	G	37968
1247_A11	csm2Δ	MMS	XIII	492595	473966	SNP	1	T	2	T/A	52.2/47.8	47/43	90	T	52.222	47	A	47.778	43	GTATTCGTATAACTGGGACA	TGATAATCGGCAATGATGTC	GTATTCGTATAACTGGGACA	TGATAATCGGCAATGATGTC	A	7079
1247_A11	csm2Δ	MMS	XIII	499498	480869	SNP	1	G	2	A/G	52.3/47.7	46/42	88	A	52.273	46	G	47.727	42	CAAACTCTAATGACGTTGTC	GTGTAACCGGCAAACAAAGT	CAAACTCTAATGACGTTGTC	GTGTAACCGGCAAACAAAGT	A	6903
1247_A11	csm2Δ	MMS	XIII	550411	531781	SNP	1	G	2	T/G	53.4/46.6	47/41	88	T	53.409	47	G	46.591	41	AAACTTGTTCAGCTTCTGGA	CCTTACCGTCTCTTGGGAAA	AAACTTGTTCAGCTTCTGGA	CCTTACCGTCTCTTGGGAAA	T	50913
1247_A11	csm2Δ	MMS	XIII	578480	559835	SNP	1	A	2	G/A	52.2/47.8	36/33	69	G	52.174	36	A	47.826	33	AACTACAAGGAGCAAGCAAA	TTGAAAAAACGCATTTGTAT	AACTACAAGGAGCAAGCAAA	TTGAAAAAACGCATTTGCAT	G	28069
1247_A11	csm2Δ	MMS	XIII	685948	667301	SNP	1	T	2	A/T	53.0/47.0	35/31	66	A	53.03	35	T	46.97	31	AATGAAATTTAAGCAGACCA	AGTATCCTTGATACATTGAC	AATGAAATTTAAGCAGACCA	AGTATCCTTGATACATTGAC	A	107468
1247_A11	csm2Δ	MMS	XIII	706255	687609	SNP	1	T	2	T/C	53.3/46.7	48/42	90	T	53.333	48	C	46.667	42	ACATATAACTCGTACAATTT	TCTCTTGTCAAAAGCTGTTC	ACATATAACTCGTACAATTT	TCTCTTGTCAAAAGCTGTTC	C	20307
1247_A11	csm2Δ	MMS	XIII	725073	706427	SNP	1	T	2	T/A	53.7/46.3	36/31	67	T	53.731	36	A	46.269	31	CTGAAGGTCTTATAATGCAG	GGCTGTCCTGTATTGGAAAC	CTGAAGGTCTTATAATGCAG	GGCTGTCCTGTATTGGAAAC	A	18818
1247_A11	csm2Δ	MMS	XIII	730369	711723	SNP	1	T	2	A/T	51.6/48.4	33/31	64	A	51.562	33	T	48.438	31	TAGACGTGGATTTAACCAAA	CTTCATCTGCGTATATGTTG	TAGACGTGGATTTAACCAAA	CTTCATCTGCGTATATGTTG	A	5296
1247_A11	csm2Δ	MMS	XIII	739686	721040	SNP	1	T	2	T/G	52.2/47.8	48/44	92	T	52.174	48	G	47.826	44	AAGATCGTAGAGAAATTCTA	GCGATGAGAAGATGGAACCA	AAGATCGTAGAGAAATTCTA	GCGATGAGAAGATGGAACCA	G	9317
1247_A11	csm2Δ	MMS	XIII	748590	729944	SNP	1	G	2	G/T	53.0/47.0	35/31	66	G	53.03	35	T	46.97	31	CATTCATATCAAGTTTATCC	TCTTCTCCAAGGCAACTTGA	CATTCATATCAAGTTTATCC	TCTTCTCCAAGGCAACTTGA	T	8904
1247_A11	csm2Δ	MMS	XIV	15450	9770	SNP	1	G	2	G/T	53.6/46.4	45/39	84	G	53.571	45	T	46.429	39	CCGTTCTTTACATCTGCAAC	ATGAATTTTTGAAGAAGAAC	CCGTTCTTTACATCTGCAAC	ATGAATTTTTGAAGAAGAAC	T
1247_A11	csm2Δ	MMS	XIV	29979	24299	SNP	1	C	2	A/C	50.0/50.0	43/43	86	A	50	43	C	50	43	TCCTATCAAGACAGTCAATA	AATTACTTCGACATATTCCT	TCCTATCAAGACAGTCAATA	AATTACTTCGACATATTCCT	A	14529
1247_A11	csm2Δ	MMS	XIV	95649	89973	SNP	1	A	2	T/A	54.3/45.7	38/32	70	T	54.286	38	A	45.714	32	ACAATATGCACGGGAAAGAA	ATGATTTAAAGGAGTTCAAC	ACAATATGCACGGGAAAGAA	ATGATTTAAAGGAGTTCAAC	T	65670
1247_A11	csm2Δ	MMS	XIV	102776	92554	SNP	1	C	2	A/C	53.5/46.5	38/33	71	A	53.521	38	C	46.479	33	CGCAAGATCGTGAGTTCAAC	CTCACTGGGGTCGTTTATTT	CGCAAGATCGTGAGTTCAAC	CTCACTGGGGTCGTTTA---	A	7127
1247_A11	csm2Δ	MMS	XIV	157180	146950	SNP	1	A	2	A/T	54.3/45.7	44/37	81	A	54.321	44	T	45.679	37	AATCCATACGATTCTATAAC	TCACACAAACCTTCCATTTG	AATCCATACGATTCTATAAC	TCACACAAACCTTCCATTTG	T	54404
1247_A11	csm2Δ	MMS	XIV	162128	151898	SNP	1	T	2	T/C	52.2/47.8	36/33	69	T	52.174	36	C	47.826	33	GCCTTACGATCAAAGGAGTT	TCTTGTTCTATCTTATATAA	GCCTTACGATCAAAGGAGTT	TCTTGTTCTATCTTATATAA	C	4948
1247_A11	csm2Δ	MMS	XIV	170041	159811	SNP	1	T	2	T/A	51.9/48.1	40/37	77	T	51.948	40	A	48.052	37	TCGACAATTGGAGCTGTTGA	ATTCTTAATCAAAAGACCAT	TCGACAATTGGAGCTGTTGA	ATTCTTAATCAAAAGACCAT	A	7913
1247_A11	csm2Δ	MMS	XIV	182049	171819	SNP	1	G	2	T/G	52.3/47.7	45/41	86	T	52.326	45	G	47.674	41	CGATATTGGCTAATGGAGTA	GTCTATCGTTGGAAGTAATT	CGATATTGGCTAATGGAGTA	GTCTATCGTTGGAAGTAATT	T	12008
1247_A11	csm2Δ	MMS	XIV	209178	198952	SNP	1	A	2	A/G	52.9/47.1	37/33	70	A	52.857	37	G	47.143	33	TTTGATATTGTCTATTCTTA	CGAAATCAAGAAAGTCACCC	TTTGATATTGTCTATTCTTA	CGAAATCAAGAAAGTCACCC	G	27129
1247_A11	csm2Δ	MMS	XIV	217999	207773	SNP	1	G	2	C/G	52.7/47.3	39/35	74	C	52.703	39	G	47.297	35	TTGGCCACCAAAGGCCACAC	TTGCGCATGCCTTTTTGCAA	TTGGCCACCAAAGGCCACAC	TTGCGCATGCCTTTTTGCAA	C	8821
1247_A11	csm2Δ	MMS	XIV	253805	243582	SNP	1	G	2	G/C	54.7/45.3	47/39	86	G	54.651	47	C	45.349	39	CTGCTTTGTCCGATGCTTTG	CTGCTTTGCAAATCGAAGAC	CTGCTTTGTCCGATGCTTTG	CTGCTTTGCAAATCGAAGAC	C	35806
1247_A11	csm2Δ	MMS	XIV	259346	249126	SNP	1	G	2	G/T	50.6/49.4	39/38	77	G	50.649	39	T	49.351	38	TGTATAATTTGTAAATTAGC	TTGTTTTTACTATGCGTTTG	TGTATAATTTGTAAATTAGC	TTGTTTTTACTATGCGTTTG	T	5541
1247_A11	csm2Δ	MMS	XIV	295418	285193	SNP	1	G	2	G/T	53.1/46.9	34/30	64	G	53.125	34	T	46.875	30	CAAGCGATTGTGACTCGGGC	TCGTGGTCAACGTATCAGCA	CAAGCGATTGTGACTCGGGC	TCGTGGTCAACGTATCAGCA	T	36072
1247_A11	csm2Δ	MMS	XIV	447641	437401	SNP	1	T	2	C/T	52.8/47.2	38/34	72	C	52.778	38	T	47.222	34	AAGGTTACGATGAAAGCTCT	CCTCTACTGCTGCTACTAGC	AAGGTTACGATGAAAGCTCT	CCTCTACTGCTGCTACTAGC	C	152223
1247_A11	csm2Δ	MMS	XIV	449613	439373	SNP	1	C	2	C/A	53.2/46.8	50/44	94	C	53.191	50	A	46.809	44	CTTACAAAATACCCTAAACT	AGTTTATCTTTCCATTCCAA	CTTACAAAATACCCTAAACT	AGTTTATCTTTCCATTCCAA	A	1972
1247_A11	csm2Δ	MMS	XIV	453490	443250	SNP	1	T	2	T/A	54.2/45.8	39/33	72	T	54.167	39	A	45.833	33	TTTACCACAATGCTGCATAG	GGAAAACCACTTACAGAAGA	TTTACCACAATGCTGCATAG	GGAAAACCACTTACAGAAGA	A	3877
1247_A11	csm2Δ	MMS	XIV	481040	470799	SNP	1	C	2	A/C	53.2/46.8	41/36	77	A	53.247	41	C	46.753	36	CATTGCATAGCCTTAGACAT	AAACTTTATTTAATCACATT	CATTGCATAGCCTTAGACAT	AAACTTTATTTAATCACATT	A	27550
1247_A11	csm2Δ	MMS	XIV	496233	485991	SNP	1	T	2	A/T	54.7/45.3	58/48	106	A	54.717	58	T	45.283	48	TCGCAGTAATATGAAATGCC	TAGTAGGAGATCGTAATAGC	TCGCAGTAATATGAAATGCC	TAGTAGGAGATCGTAATAGC	A	15193
1247_A11	csm2Δ	MMS	XIV	499947	489705	SNP	1	G	2	G/C	52.7/47.3	48/43	91	G	52.747	48	C	47.253	43	ACCAAGGGTTACAAGTACAA	ATGAGATACGTCTACGCGCA	ACCAAGGGTTACAAGTACAA	ATGAGATACGTCTACGCGCA	C	3714
1247_A11	csm2Δ	MMS	XIV	552787	542545	SNP	1	C	2	C/A	50.5/49.5	50/49	99	C	50.505	50	A	49.495	49	TATTCTTCACTAATTCCATG	ATATTAAGAACTGCTGGAAT	TATTCTTCACTAATTCCATG	ATATTAAGAACTGCTGGAAT	A	52840
1247_A11	csm2Δ	MMS	XIV	584145	573180	SNP	1	A	2	T/A	51.9/48.1	41/38	79	T	51.899	41	A	48.101	38	ACCCAGCTTTCCACCTCAAT	TCAAAGCAATTTTTAATTAT	ACCCAGCTTTCCACCTCAAT	TCAAAGCAATTTTTAATTAT	T	31358
1247_A11	csm2Δ	MMS	XIV	613329	602364	SNP	1	A	2	T/A	52.6/47.4	41/37	78	T	52.564	41	A	47.436	37	AGGAAATACGAAACAGGTTA	TACAACAGTAGTAACTTTCC	AGGAAATACGAAACAGGTTA	TACAACAGTAGTAACTTTCC	T	29184
1247_A11	csm2Δ	MMS	XIV	616231	605266	SNP	1	T	2	A/T	54.7/45.3	35/29	64	A	54.688	35	T	45.312	29	CTAGACTATATTCAACTTAC	GTAACCCTTCACCTCACTAT	CTAGACTATATTCAACTTAC	GTAACCCTTCACCTCACTAT	A	2902
1247_A11	csm2Δ	MMS	XIV	618807	607842	SNP	1	G	2	G/A	55.0/45.0	44/36	80	G	55	44	A	45	36	TTTGGATGGCTCTTTTCCTG	ATGACAAACTGCAAAGTCTT	TTTGGATGGCTCTTTTCCTG	ATGACAAACTGCAAAGTCTT	A	2576
1247_A11	csm2Δ	MMS	XIV	628826	617861	SNP	1	A	2	G/A	51.7/44.8	30/26	58	G	51.724	30	A	44.828	26	CATTTTTTTATTATTTTTTT	TATATTAATGTTAAAATTTA	CATTTTTTTATTATTTTTTT	TATATTAATGTTAAAATTTA	G	10019
1247_A11	csm2Δ	MMS	XV	111007	110952	SNP	1	G	2	T/G	50.6/49.4	44/43	87	T	50.575	44	G	49.425	43	GTCCCCACCTTGGAAGGGTG	GATGATAACCACTACACTAA	GTCCCCACCTTGGAAGGGTG	GATGATAACCACTACACTAA	T
1247_A11	csm2Δ	MMS	XV	490066	486606	SNP	1	A	2	A/G	53.0/47.0	62/55	117	A	52.991	62	G	47.009	55	AGAAAAGAAAAACAACGATT	CGGTAAAAAATGAAAACTCC	AGAAAAGAAAAACAACGATT	CGGTAAAAAATGAAAACTCC	G	379059
1247_A11	csm2Δ	MMS	XVI	381661	368983	SNP	1	C	2	G/C	50.9/49.1	27/26	53	G	50.943	27	C	49.057	26	GAACGTGGAAGTATTTCACC	ACGTATGGCAGGCAAGAACG	GAACGTGGAAGTATTTCACC	ACGTATGGCAGGCAAGAACG	G
1247_A11	csm2Δ	MMS	XVI	407609	394931	SNP	1	C	2	T/C	54.3/45.7	44/37	81	T	54.321	44	C	45.679	37	TATCCTTTACATAAGAATTG	GTATAGATAGATACTATAAC	TATCCTTTACATAAGAATTG	GTATAGATAGATACTATAAC	T	25948
1247_A11	csm2Δ	MMS	XVI	427964	415286	SNP	1	A	2	T/A	54.4/45.6	37/31	68	T	54.412	37	A	45.588	31	AAAATTAAACCAAAACCAGG	TATTTCCCAATTATTCCACG	AAAATTAAACCAAAACCAGG	TATTTCCCAATTATTCCACG	T	20355
1247_A11	csm2Δ	MMS	XVI	461233	444667	SNP	1	G	2	A/G	51.6/48.4	48/45	93	A	51.613	48	G	48.387	45	TGGTCATGTCTTGAATTAAA	ATGGTGGTGTCTCTATAATA	TGGTCATGTCTTGAATTAAA	ATGGTGGTGTCTCTATAATA	A	33269
1247_A11	csm2Δ	MMS	XVI	463113	446547	SNP	1	T	2	T/A	52.3/47.7	34/31	65	T	52.308	34	A	47.692	31	CCTAGCGTTGCCACCTTGCA	AGCATAAGGAATGGAGGTCC	CCTAGCGTTGCCACCTTGCA	AGCATAAGGAATGGAGGTCC	A	1880
1247_A11	csm2Δ	MMS	XVI	647480	630913	SNP	1	A	2	A/G	51.2/48.8	44/42	86	A	51.163	44	G	48.837	42	CCCAGCAACACCACCTCGAC	TATTTGCAATAACCCAAACA	CCCAGCAACACCACCTCGAC	TATTTGCAATAACCCAAACA	G	184367
1247_A11	csm2Δ	MMS	XVI	678442	661875	SNP	1	G	2	G/T	52.3/47.7	45/41	86	G	52.326	45	T	47.674	41	TTCAGTATTTTTTCTTCCAT	TTGCGCGTTACGAGAACAGA	TTCAGTATTTTTTCTTCCAT	TTGCGCGTTACGAGAACAGA	T	30962
1247_A11	csm2Δ	MMS	XVI	703001	686434	SNP	1	T	2	A/T	50.0/50.0	39/39	78	A	50	39	T	50	39	ATAGTGTGCCATTTCATTCT	CAAATGCTGGCGAAATCTGA	ATAGTGTGCCATTTCATTCT	CAAATGCTGGCGAAATCTGA	A	24559
1247_A11	csm2Δ	MMS	XVI	764308	747741	SNP	1	T	2	T/A	51.1/48.9	47/45	92	T	51.087	47	A	48.913	45	AAACGGCTAATGGTTACGCA	ATTTATCGGCATATTACTAC	AAACGGCTAATGGTTACGCA	ATTTATCGGCATATTACTAC	A	61307
1247_A11	csm2Δ	MMS	XVI	928942	901767	SNP	1	C	2	C/T	51.0/49.0	52/50	102	C	50.98	52	T	49.02	50	CTGCTCTAGCGGGTAAAAGT	AATGACAGCAGACGCGGCAA	CTGCTCTAGCGGGTAAAAGT	AATGACAGCAGACGCGGCAA	T	164634
1247_A11	csm2Δ	MMS	V	140344	140322	DIP	1	T	2	T/-	50.0/49.1	53/52	106	T	50	53	-	49.057	52	TGTTTTGTTTTGTATATCTA	TATATAAGAAGATAAGTACT	TGTTTTGTTTTGTATATCTA	TATATAAGAAGATAAGTACT	-
1247_A11	csm2Δ	MMS	VII	11149	4754	Complex DIP	1	A	2	-/G	50.0/50.0	47/47	94	-	50	47	G	50	47	TTACTTTTTTCAGCGTCCTT	TTTCTGTTGCAACAACCGTC	TTACTTTTTTCAGCGTCCTT	GTTCTGTTGCAACAGCCATC	-
1247_A11	csm2Δ	MMS	VII	330630	324236	DIP	1	G	2	G/-	51.8/48.2	44/41	85	G	51.765	44	-	48.235	41	CTTTGTTCTATACAGTAAAA	ATGGCCTTAACTCAAAACCA	CTTTGTTCTATACAGTAAAA	ATGGCCTTAACTCAAAACCA	-	319481
1247_A11	csm2Δ	MMS	VIII	253635	245531	DIP	1	-	2	-/T	54.2/45.8	45/38	83	-	54.217	45	T	45.783	38	CATTTGATATTCTATGCATG	TTTTGTCCATAATCGTTAAT	CATTTGATATTCTATGCATG	TTTGTCCATAATCGTTAATT	T
1247_A11	csm2Δ	MMS	VIII	327856	319751	DIP	1	T	2	T/-	54.9/45.1	45/37	82	T	54.878	45	-	45.122	37	GTGTTGCTGACCATCTGCCC	TTTCAAGACAGTCTGAAATA	GTGTTGCTGACCATCTGCCC	TTTCAAGACAGTCTGAAATA	-	74221
1247_A11	csm2Δ	MMS	X	382303	367557	DIP	1	G	2	-/G	54.3/45.7	50/42	92	-	54.348	50	G	45.652	42	GTCCAGCCAAATGTCCACCC	TATTGAAATTGACTCCTTCG	GTCCAGCCAAATGTCCACCC	TATTGAAATTGACTCCTTCG	-
1247_A11	csm2Δ	MMS	XIV	89065	83385	DIP	1	A	2	A/-	50.9/49.1	28/27	55	A	50.909	28	-	49.091	27	TTATGTTTTACATATGATAG	AAAAATGAAGCAATAGCAAA	TTATGTTTTACATATGATAG	AAAAATGAAGCAATAGCAAA	-
1247_A4	csm2Δ	MMS	I	43984	42984	SNP	1	A	2	A/G	53.1/46.9	34/30	64	A	53.125	34	G	46.875	30	TTGGTGAGTGTCAAAAGTGT	GCGCATGGTCAACAAAGCTC	TTGGTGAGTGTCAAAAGTGT	GCGCATGGTCAACAAAGCTC	G
1247_A4	csm2Δ	MMS	I	57006	56006	SNP	1	G	2	T/G	51.4/48.6	36/34	70	T	51.429	36	G	48.571	34	ACTAAAAGTGATACTTACAC	AGCTTTTTTGGTTCCAAACT	ACTAAAAGTGATACTTACAC	AGCTTTTTTGGTTCCAAACT	T	13022
1247_A4	csm2Δ	MMS	I	71858	70858	SNP	1	G	2	G/T	50.0/50.0	37/37	74	G	50	37	T	50	37	TGAGAAGAACCTCCATCATT	GTACCATCGGTCCAAAGACC	TGAGAAGAACCTCCATCATT	GTACCATCGGTCCAAAGACC	T	14852
1247_A4	csm2Δ	MMS	I	74204	73204	SNP	1	A	2	T/A	50.9/49.1	55/53	108	T	50.926	55	A	49.074	53	AGCGTCGTTTTATACCCAGT	TTTCAGGAACTCTAATTCGG	AGCGTCGTTTTATACCCAGT	TTTCAGGAACTCTAATTCGG	T	2346
1247_A4	csm2Δ	MMS	I	101023	100023	SNP	1	T	2	A/T	51.4/48.6	36/34	70	A	51.429	36	T	48.571	34	GAGTTGGCAAGTGGGCATGA	TGCCTTGTACACAACCCAGT	GAGTTGGCAAGTGGGCATGA	TGCCTTGTACACAACCCAGT	A	26819
1247_A4	csm2Δ	MMS	I	155218	154168	SNP	1	G	2	G/A	54.4/45.6	43/36	79	G	54.43	43	A	45.57	36	GAAATATGTTGGGAGCACAT	TTCGACCCATTACATCTATC	GAAATATGTTGGGAGCACAT	TTCGACCCATTACATCTATC	A	54195
1247_A4	csm2Δ	MMS	I	187219	183629	SNP	1	G	2	C/G	53.0/47.0	53/47	100	C	53	53	G	47	47	ACTTCAATTTTATTATTAGT	TTTTTTTATAATACGGAATT	ACTTCAATTTTATTATTAGT	TTTTTTTATAATACGGAATT	C	32001
1247_A4	csm2Δ	MMS	II	56925	54718	SNP	1	T	2	T/C	53.8/46.3	43/37	80	T	53.75	43	C	46.25	37	TAGGTAAGCTCGCACTGCTT	ATCTATAGTGGAGTGCAGAG	TAGGTAAGCTCGCACTGCTT	ATCTATAGTGGAGTGCAGAG	C
1247_A4	csm2Δ	MMS	II	74687	72480	SNP	1	C	2	C/G	51.8/48.2	43/40	83	C	51.807	43	G	48.193	40	AAAGAATAAAAACGTGCAAG	CGCAACATATCTAGTTCCTA	AAAGAATAAAAACGTGCAAG	CGCAACATATCTAGTTCCTA	G	17762
1247_A4	csm2Δ	MMS	II	120304	118092	SNP	1	T	2	C/T	54.4/45.6	31/26	57	C	54.386	31	T	45.614	26	ATGAGCGTGTTTTATGGCGA	ACAAAACTTGAAGTTGTTCC	ATGAGCGTGTTTTATGGCGA	ACAAAACTTGAAGTTGTTCC	C	45617
1247_A4	csm2Δ	MMS	II	187207	184985	SNP	1	G	2	G/A	52.7/47.3	29/26	55	G	52.727	29	A	47.273	26	AAAAGAGACCCGATATTTGA	AAAACGTAAAATCCTGATTT	AAAAGAGACCCGATATTTGA	AAAACGTAAAATCCTGATTT	A	66903
1247_A4	csm2Δ	MMS	II	197483	195259	SNP	1	C	2	A/C	50.6/49.4	44/43	87	A	50.575	44	C	49.425	43	TTCTTCTTCAAGCACGTTAA	CAGTAATCAAGGTCTCTTGG	TTCTTCTTCAAGCACGTTAA	CAGTAATCAAGGTCTCTTGG	A	10276
1247_A4	csm2Δ	MMS	II	197645	195421	SNP	1	C	2	C/A	51.2/48.8	43/41	84	C	51.19	43	A	48.81	41	GAATTGCGCAAGCCCGGAAT	GAACCGGGGGCCCAACGATG	GAATTGCGCAAGCCCGGAAT	GAACCGGGGGCCCAACGATG	A	162
1247_A4	csm2Δ	MMS	II	219344	217120	SNP	1	A	2	A/T	53.6/46.4	37/32	69	A	53.623	37	T	46.377	32	ACCTCAAGAGTTTTTCAAGT	GCTCACTGCAAATATCCAGA	ACCTCAAGAGTTTTTCAAGT	GCTCACTGCAAATATCCAGA	T	21699
1247_A4	csm2Δ	MMS	II	258018	255570	SNP	1	G	2	G/T	50.0/50.0	29/29	58	G	50	29	T	50	29	TCCTGTTCTATAGACCTAAG	GACAACAAATCAAAATAGAT	TCCTGTTCTATAGACCTAAG	GACAACAAATCAAAATAGAT	T	38674
1247_A4	csm2Δ	MMS	II	266406	257571	SNP	1	A	2	A/G	51.2/48.8	43/41	84	A	51.19	43	G	48.81	41	GGCCAAGTTGGTAAGGCGCC	CACTAGTAATGTGGAGATCA	GGCCAAGTTGGTAAGGCGCC	CACTAGTAATGTGGAGATCA	G	8388
1247_A4	csm2Δ	MMS	II	266425	257590	SNP	1	C	2	C/A	52.4/47.6	44/40	84	C	52.381	44	A	47.619	40	CACACTAGTAATGTGGAGAT	ATCGGTTCAAATCCGATTGG	CGCACTAGTAATGTGGAGAT	ATCGGTTCAAATCCGATTGG	A	19
1247_A4	csm2Δ	MMS	II	267470	258637	SNP	1	A	2	A/T	54.8/45.2	40/33	73	A	54.795	40	T	45.205	33	TTGGCAAATATCCTGCCGAA	GTACTTCTTTATTTTTTTTC	TTGGCAAATATCCTGCCGAA	GTACTTCTTTATTTTTTTTC	T	1045
1247_A4	csm2Δ	MMS	II	301246	292413	SNP	1	C	2	C/T	53.8/46.3	43/37	80	C	53.75	43	T	46.25	37	TTTTCACCGAAACTTTGAAA	ACGATTAAACTTATTAGTAC	TTTTCACCGAAACTTTGAAA	ACGATTAAACTTATTAGTAC	T	33776
1247_A4	csm2Δ	MMS	II	303014	294181	SNP	1	T	2	T/C	51.7/48.3	31/29	60	T	51.667	31	C	48.333	29	GGAACCTACAGACAGTTTGA	GCAACCTCGTTCTACAAGGT	GGAACCTACAGACAGTTTGA	GCAACCTCGTTCTACAAGGT	C	1768
1247_A4	csm2Δ	MMS	II	345976	337143	SNP	1	T	2	T/A	54.2/45.8	39/33	72	T	54.167	39	A	45.833	33	TCTGCACGTTTCAACCATGC	GACAAGGTCGCTTTGTACCC	TCTGCACGTTTCAACCATGC	GACAAGGTCGCTTTGTACCC	A	42962
1247_A4	csm2Δ	MMS	II	347663	338830	SNP	1	C	2	T/C	53.7/46.3	29/25	54	T	53.704	29	C	46.296	25	CTGTTGGACGGTTGTCCGCG	GAGTTCGAACCTCGCATCCT	CTGTTGGACGGTTGTCCGCG	GAGTTCGAACCTCGCATCCT	T	1687
1247_A4	csm2Δ	MMS	II	350886	342053	SNP	1	C	2	G/C	50.7/49.3	37/36	73	G	50.685	37	C	49.315	36	CGGACAACCCCGGTTCGAAT	CGGGTAAGACCTTATTTTTA	CGGACAACCCCGGTTCGAAT	CGGGTAAGACCTTATTTTTA	G	3223
1247_A4	csm2Δ	MMS	II	363164	354332	SNP	1	T	2	T/A	52.9/47.1	36/32	68	T	52.941	36	A	47.059	32	TTTATCCATACAAGTTCCGA	TATATATATTCAATCCTGAA	TTTATCCATACAAGTTCCGA	TATATATATTCAATCCTGAA	A	12278
1247_A4	csm2Δ	MMS	II	430573	421740	SNP	1	T	2	T/A	53.8/46.2	42/36	78	T	53.846	42	A	46.154	36	GTCCGAGTTGGCAAAAGTGG	TTCCATTTCCAAATCATCGT	GTCCGAGTTGGCAAAAGTGG	TTCCATTTCCAAATCATCGT	A	67409
1247_A4	csm2Δ	MMS	II	481472	472639	SNP	1	G	2	C/G	52.8/47.2	38/34	72	C	52.778	38	G	47.222	34	ATATCGCGGATAGCCTTGAT	ACATTTTCGACGGAACCTCT	ATATCGCGGATAGCCTTGAT	ACATTTTCGACGGAACCTCT	C	50899
1247_A4	csm2Δ	MMS	II	522112	513279	SNP	1	T	2	A/T	53.8/46.2	35/30	65	A	53.846	35	T	46.154	30	TCAACCATTTATTCTTTAAA	GGAAATGATTTGAAATGCCC	TCAACCATTTATTCTTTAAA	GGAAATGATTTGAAATGCCC	A	40640
1247_A4	csm2Δ	MMS	II	525028	516195	SNP	1	T	2	A/T	52.1/47.9	25/23	48	A	52.083	25	T	47.917	23	CTCCTGCATGCATATTTGTA	TTGTCATCGATGCATTAGAA	CTCCTGCATGCATATTTGTA	TTGTCATCGATGCATTAGAA	A	2916
1247_A4	csm2Δ	MMS	II	535069	526236	SNP	1	A	2	G/A	50.9/49.1	29/28	57	G	50.877	29	A	49.123	28	CGAGACATATAATGTGATAT	TAGATGAACTTTACGTATAA	CGAGACATATAATGTGATAT	TAGATGAACTTTACGTATAA	G	10041
1247_A4	csm2Δ	MMS	II	574252	565419	SNP	1	C	2	G/C	50.7/49.3	34/33	67	G	50.746	34	C	49.254	33	ATTCATCATCGAGTTTGGCA	GAAGGGTATAAATATACTCT	ATTCATCATCGAGTTTGGCA	GAAGGGTATAAATATACTCT	G	39183
1247_A4	csm2Δ	MMS	II	580865	572032	SNP	1	T	2	T/A	54.5/45.5	30/25	55	T	54.545	30	A	45.455	25	AGATTGGGCAGCAGTTGGTG	ACTTAATGGAGTAATATCTA	AGATTGGGCAGCAGTTGGTG	ACTTAATGGAGTAATATCTA	A	6613
1247_A4	csm2Δ	MMS	II	635056	626227	SNP	1	C	2	T/C	52.3/47.7	34/31	65	T	52.308	34	C	47.692	31	AACTTGATATTATAAAGAAT	AAGCATCTTACTGAACTTTT	AACTTGATATTATAAAGAAT	AAGCATCTTACTGAACTTTT	T	54191
1247_A4	csm2Δ	MMS	II	645749	636545	SNP	1	T	2	T/C	54.7/45.3	41/34	75	T	54.667	41	C	45.333	34	CATTTCTGCATTGTTTCTTT	TAACGGGTACTGGTTCGTAT	CATTTCTGCGTTGTTTCTTT	TAACGGGTACTGGTTCGTAT	C	10693
1247_A4	csm2Δ	MMS	II	661624	652418	SNP	1	G	2	G/T	53.2/46.8	41/36	77	G	53.247	41	T	46.753	36	CATTACCGAAGGCAGTACGG	CTTCGGAGGTAGCACGTTGA	CATTACCGAAGGCAGTACGG	CTTCGGAGGTAGCACGTTGA	T	15875
1247_A4	csm2Δ	MMS	II	683063	673857	SNP	1	G	2	C/G	51.9/48.1	40/37	77	C	51.948	40	G	48.052	37	CTCGTCCTCCTTTTCGTTTG	TATAATCTTTGTCTCTACTT	CTCGTCCTCCTTTTCGTTTG	TATAATCTTTGTCTCTACTT	C	21439
1247_A4	csm2Δ	MMS	II	700074	690869	SNP	1	G	2	G/A	53.5/46.5	23/20	43	G	53.488	23	A	46.512	20	TTATCTAAGAGAGTAATGCC	TTGCACCGGCTCTTGTTTAG	TTATCTAAGACAGTAATGCC	TTGCACCGGCTCTTGTTTAG	A	17011
1247_A4	csm2Δ	MMS	II	711555	702350	SNP	1	C	2	A/C	53.6/46.4	45/39	84	A	53.571	45	C	46.429	39	GCCATAATAGGGTATTTCTA	ATCCACCTCTAGCTGGTTTT	GCCATAATAGGGTATTTCTA	ATCCACCTCTAGCTGGTTTT	A	11481
1247_A4	csm2Δ	MMS	II	748795	739583	SNP	1	T	2	C/T	50.0/50.0	42/42	84	C	50	42	T	50	42	TGGCTTATCATCATCAAGGG	TCTGTGATGAGTTTCATCAA	TGGCTTATCATCATCAAGGG	TCTGTGATGAGTTTCATCAA	C	37240
1247_A4	csm2Δ	MMS	II	776521	767311	SNP	1	G	2	C/G	53.9/46.1	41/35	76	C	53.947	41	G	46.053	35	GTGAAGCCCGTTTTTGGTTT	TTATTCCCAACTAACCATAC	GTGAAGCCCGTTTTTGGTTT	TTATTCCCAACTAACCATAC	C	27726
1247_A4	csm2Δ	MMS	II	780341	771131	SNP	1	A	2	G/A	54.3/45.7	50/42	92	G	54.348	50	A	45.652	42	CAGCAGCAACAAAAGCAACA	CAACAGCAGCAGCAGCATCA	CAGCAGCAACAAAAGCAACA	CAACAGCAGCAGCAGCATCA	G	3820
1247_A4	csm2Δ	MMS	III	1229	1229	SNP	1	T	2	T/C	50.6/49.4	45/44	89	T	50.562	45	C	49.438	44	TGAGTAATGCTTTAGTATTG	TTCAGAGTTGTTTCAGTAAT	TGAGTAATGCTTTAGTATTG	TTCAGAGTTGTTTCAGTAAT	C
1247_A4	csm2Δ	MMS	III	3946	3946	SNP	1	A	2	A/G	51.6/48.4	48/45	93	A	51.613	48	G	48.387	45	TAGAACATGTTATCACAAAG	AACAAGTTGCTGACATATTT	TAGAACATGTTATCACAAAG	AACAAGTTGCTGACATATTT	G	2717
1247_A4	csm2Δ	MMS	III	8347	8347	SNP	1	T	2	T/C	52.7/47.3	29/26	55	T	52.727	29	C	47.273	26	CCGATAATTTATTTACTTGA	TATTCCTTTTTTTTTTTTTT	CCGATAATTTATTTACTTGA	TATTCCTTTTTTTTTTTTTT	C	4401
1247_A4	csm2Δ	MMS	III	117642	114892	SNP	1	C	2	C/A	54.8/45.2	40/33	73	C	54.795	40	A	45.205	33	TTTCAATCTCATTCTCAGAA	CAACCACTGCAAACGGAATG	TTTCAATCTCATTCTCAGAA	CAACCACTGCAAACGGAATG	A	109295
1247_A4	csm2Δ	MMS	III	191690	186040	SNP	1	T	2	T/A	50.5/49.5	46/45	91	T	50.549	46	A	49.451	45	TTTCGTATATTCGTTTTTTC	TAGTGGATCTATTGTTACTA	TTTCGTATATTCGTTTTTTC	TAGTGGATCTATTGTTACTA	A	74048
1247_A4	csm2Δ	MMS	III	217074	210740	SNP	1	T	2	C/T	52.4/47.6	33/30	63	C	52.381	33	T	47.619	30	ACCTACGCTTTCAAAGACGT	GCTTTACAATTTGTCGGTAA	ACCTACGCTTTCAAAGACGT	GCTTTACAATTTGTCGGTAA	C	25384
1247_A4	csm2Δ	MMS	III	243111	236777	SNP	1	T	2	T/A	51.4/48.6	37/35	72	T	51.389	37	A	48.611	35	AGATATTCTCCGGTTTAATG	CGCGATGCACCACGCCAGAT	AGATATTCTCCGGTTTAATG	CGCGATGCACCACGCCAGAT	A	26037
1247_A4	csm2Δ	MMS	III	291901	285566	SNP	1	A	2	A/G	52.7/47.3	39/35	74	A	52.703	39	G	47.297	35	CATTTAATAATCAATTTAAA	CTAGAGTTGGTAGAGTTCCT	CATTTAATAATCAATTTAAA	CTAGAGTTGGTAGAGTTCCT	G	48790
1247_A4	csm2Δ	MMS	III	296303	289965	SNP	1	T	2	T/C	51.2/48.8	42/40	82	T	51.22	42	C	48.78	40	AGTAGTAAGAAATTAAGCAA	ATGGTAATTTGAGCTTATCA	AGTAGTAAGAAATTAAGCAA	ATGGTAATTTGAGCTTATCA	C	4402
1247_A4	csm2Δ	MMS	III	301872	295534	SNP	1	T	2	A/T	52.8/47.2	38/34	72	A	52.778	38	T	47.222	34	TGGTTTCTCCTCCGGCTATA	TTTCAGTATAGTTTACTTGG	TGGTTTCTCCTCCGGCTATA	TTTCAGTATAGTTTACTTGG	A	5569
1247_A4	csm2Δ	MMS	III	316530	309952	SNP	1	T	2	T/G	54.5/36.4	2018-06-04	11	T	54.545	6	G	36.364	4	GTGTTAGGGTAGTGTGTGGG	GTGGGTGTGTGGGTGTGGTG	GGGTTAGGGTAGTGTGTGGG	GTGGGTGTGTGGGTGTGGTG	G	14658
1247_A4	csm2Δ	MMS	IV	17685	11431	SNP	1	A	2	A/T	53.2/46.8	42/37	79	A	53.165	42	T	46.835	37	AAACCAACATCAAAAGGAAT	ATACTTTCTAAGTATTCTAT	AAACCAACATCAAAAGGAAT	ATACTTTCTAAGTATTCTAT	T
1247_A4	csm2Δ	MMS	IV	30951	24513	SNP	1	T	2	A/T	50.5/49.5	48/47	95	A	50.526	48	T	49.474	47	GTGCCAGTTCAAAAAAGTGT	TACCAGTAGACTCTGCTATC	GTGCCAGTTCAAAAAAGTGT	TACCAGTAGACTCTGCTATC	A	13266
1247_A4	csm2Δ	MMS	IV	31357	24919	SNP	1	C	2	C/T	53.1/46.9	52/46	98	C	53.061	52	T	46.939	46	TTTCAAATCTCTGATTGATT	TGGATATTTGACATATTACG	TTTCAAATCTCTGATTGATT	TGGATATTTGACATATTACG	T	406
1247_A4	csm2Δ	MMS	IV	36760	30320	SNP	1	T	2	C/T	54.7/45.3	41/34	75	C	54.667	41	T	45.333	34	AAGACAACACTTGACACTGT	CATGGGGCAGAAGGAAAAGC	AAGACAACACTTGACACTGT	CATGGGGCAGAAGGAAAAGC	C	5403
1247_A4	csm2Δ	MMS	IV	41986	35546	SNP	1	C	2	A/C	52.1/47.9	37/34	71	A	52.113	37	C	47.887	34	CGGCTTGGTAAAAGCAGCAT	AAAAAACCCATCTCTCAGCT	CGGCTTGGTAAAAGCAGCAT	AAAAAACCCATCTCTCAGCT	A	5226
1247_A4	csm2Δ	MMS	IV	117622	111182	SNP	1	T	2	T/A	53.0/47.0	35/31	66	T	53.03	35	A	46.97	31	TACGCTGTCGATTAGCACTA	TATTGACCGTAGAATAGGTA	TACGCTGTCGATTAGCACTA	TATTGACCGTAGAATAGGTA	A	75636
1247_A4	csm2Δ	MMS	IV	150407	143967	SNP	1	G	2	G/A	54.2/45.8	45/38	83	G	54.217	45	A	45.783	38	GGTCTTCAATAATACCTAGT	TACAAGCTCCCTCACAGGGT	GGTCTTCAATAATACCTAGT	TACAAGCTCCCTCACAGGGT	A	32785
1247_A4	csm2Δ	MMS	IV	157163	150723	SNP	1	C	2	C/A	54.2/45.8	45/38	83	C	54.217	45	A	45.783	38	TTCAATTCCGTTGTTAAGTA	TGGCTGATTGTGAATTTTAT	TTCAATTCCGTTGTTAAGTA	TGGCTGATTGTGAATTTTAT	A	6756
1247_A4	csm2Δ	MMS	IV	211097	204644	SNP	1	A	2	A/C	50.0/50.0	24/24	48	A	50	24	C	50	24	TACCTCTGTGAGAGCAATTA	TGTTCTTGCTGCACTCTAAA	TACCTCTGTGAGAGCAATTA	TGTTCTTGCTGCACTCTAAA	C	53934
1247_A4	csm2Δ	MMS	IV	237620	231166	SNP	1	A	2	A/T	51.5/48.5	35/33	68	A	51.471	35	T	48.529	33	AGCAATGACAACAACATTAG	TCTTGCCTTCATACCATCCA	AGCAATGACAACAACATTAG	TCTTGCCTTCATACCATCCA	T	26523
1247_A4	csm2Δ	MMS	IV	246688	240234	SNP	1	T	2	C/T	52.5/47.5	32/29	61	C	52.459	32	T	47.541	29	AATGAAATATGTGTCTATTT	TTACATGAATCTTTTGACCA	AATGAAATATGTGTCTATTT	TTACATGAATCTTTTGACCA	C	9068
1247_A4	csm2Δ	MMS	IV	271078	264624	SNP	1	G	2	C/G	50.0/50.0	35/35	70	C	50	35	G	50	35	AATTCGTGACTGAACTTAAT	GGAAAAAGATCCTGAAGAGA	AATTCGTGACTGAACTTAAT	GGAAAAAGATCCTGAAGAGA	C	24390
1247_A4	csm2Δ	MMS	IV	275674	269220	SNP	1	T	2	A/T	50.9/49.1	28/27	55	A	50.909	28	T	49.091	27	ATTCATTGGAAATTTCAGAA	ATTCTATGACACATGGTTTC	ATTCATTGGAAATTTCAGAA	ATTCTATGACACATGGTTTC	A	4596
1247_A4	csm2Δ	MMS	IV	278692	272238	SNP	1	G	2	G/C	50.7/49.3	34/33	67	G	50.746	34	C	49.254	33	GATGTACCGATTGCAACTTT	GATTTCAATTCTTTATATCC	GATGTACCGATTGCAACTTT	GATTTCAATTCTTTATATCC	C	3018
1247_A4	csm2Δ	MMS	IV	359601	353152	SNP	1	C	2	C/G	51.3/48.7	39/37	76	C	51.316	39	G	48.684	37	TGTTAGCTCAGTTGGTAGAG	GTTCGGCTTTTAAGCGCATT	TGTTAGCTCAGTTGGTAGAG	GTTCGGCTTTTAAGCGCATT	G	80909
1247_A4	csm2Δ	MMS	IV	364538	358089	SNP	1	A	2	T/A	54.5/45.5	30/25	55	T	54.545	30	A	45.455	25	GAAATCGTATTCCAATGACG	TGAGTCCAACGAAATTTTGT	GAAATCGTATTCCAATGACG	TGAGTCCAACGAAATTTTGT	T	4937
1247_A4	csm2Δ	MMS	IV	388701	381856	SNP	1	T	2	C/T	53.2/46.8	25/22	47	C	53.191	25	T	46.809	22	TTAATCAAATCTGGCGATTT	TTTGATTGAGTTCGCTTTAT	TTAATCAAATCTGGCGATTT	TTTGATTGAGTTCGCTTTAT	C	24163
1247_A4	csm2Δ	MMS	IV	388994	382149	SNP	1	G	2	T/G	53.3/46.7	32/28	60	T	53.333	32	G	46.667	28	CTTTTGTTCTCTAATGGTTC	CCGCCAGACAGAAAAAAAGC	CTTTTGTTCTCTAATGGTTC	CCGCCAGACAGAAAAAATGC	T	293
1247_A4	csm2Δ	MMS	IV	410364	403503	SNP	1	G	2	A/G	50.6/49.4	39/38	77	A	50.649	39	G	49.351	38	TAAGAAAGATTCTCGGTAAC	ACCATACAAATATTGGGCGT	TAAGAAAGATTCTCGGTAAC	ACCATACAAATATTGGGCGT	A	21370
1247_A4	csm2Δ	MMS	IV	413246	406383	SNP	1	C	2	A/C	50.7/49.3	35/34	69	A	50.725	35	C	49.275	34	ATTATAATATTAGCTGTACA	CTCTTCCGCATTTTTTGAGG	ATTATAATATTAGCTGTACA	CTCTTCCGCATTTTTTGAGG	A	2882
1247_A4	csm2Δ	MMS	IV	423947	417084	SNP	1	C	2	C/T	52.7/47.3	39/35	74	C	52.703	39	T	47.297	35	GCTCGATAAACGCCTTAGGC	TACATAAATCTTAAACATTT	GCTCGATAAACGCCTTAGGC	TACATAAATCTTAAACATTT	T	10701
1247_A4	csm2Δ	MMS	IV	456761	449527	SNP	1	A	2	A/T	50.6/49.4	45/44	89	A	50.562	45	T	49.438	44	TTTAAAAATAGAAACTTACA	TAGTAGACATAAAGGGACTG	TTTAAAAATAGAAACTTACA	TAGTAGACATAAAGGGACTG	T	32814
1247_A4	csm2Δ	MMS	IV	485226	477992	SNP	1	T	2	A/T	51.6/48.4	32/30	62	A	51.613	32	T	48.387	30	TATGTGATTCAATATGAGTC	GTCCCTTGTATAGTACGGGC	TATGTGATTCAATATGAGTC	GTCCCTTGTATAGTACGGGC	A	28465
1247_A4	csm2Δ	MMS	IV	525869	517693	SNP	1	G	2	A/G	52.0/48.0	26/24	50	A	52	26	G	48	24	GCTCCAAATTGAAATTCTAT	TTCTTCACGGTGATGGTGTT	GCTCCAAATTGAAATTCTAT	TTCTTCACGGTGATGGTGTT	A	40643
1247_A4	csm2Δ	MMS	IV	538946	523976	SNP	1	A	2	T/A	52.3/47.7	23/21	44	T	52.273	23	A	47.727	21	TCAGGTGAAAGTATATGACC	AAATCTACATCCCTGCCCTA	TCAGGTGAAAGTATATGACC	AAATCTACATCCCTGCCCTA	T	13077
1247_A4	csm2Δ	MMS	IV	556498	541529	SNP	1	T	2	A/T	51.7/48.3	30/28	58	A	51.724	30	T	48.276	28	GTTTATGTATGTGTTTTTTG	AGTTATAGATTTAAGCAAGA	GTTTATGTATGTGTTTTTTG	ATTTGTAGATTTAAGCAAGA	A	17552	Complex
1247_A4	csm2Δ	MMS	IV	556500	541531	SNP	1	G	2	T/G	52.8/47.2	28/25	53	T	52.83	28	G	47.17	25	TTATGTATGTGTTTTTTGTA	TTATAGATTTAAGCAAGAAA	TTATGTATGTGTTTTTTGAA	TTGTAGATTTAAGCAAGAAA	T	2	Complex
1247_A4	csm2Δ	MMS	IV	556503	541534	SNP	1	A	2	G/A	52.4/46.0	33/29	63	G	52.381	33	A	46.032	29	TGTATGTGTTTTTTGTAGTT	TAGATTTAAGCAAGAAAAGA	TGTATGTGTTTTTTGAATTT	TAGATTTAAGCAAGAAAAGA	G	3	Complex
1247_A4	csm2Δ	MMS	IV	600755	585785	SNP	1	C	2	C/A	51.0/49.0	25/24	49	C	51.02	25	A	48.98	24	TTGATTTATAGTCGTAACTA	AAAGACAAGCAAAATAAAAT	TTGATTTATAGTCGTAACTA	AAAGACAAGCAAAATAAAAT	A	44252
1247_A4	csm2Δ	MMS	IV	618474	603504	SNP	1	A	2	A/T	50.7/47.9	37/35	73	A	50.685	37	T	47.945	35	TCGTGCTCCGTGACTAGGAT	TTGGAAATTCAAATGATATA	TCGTGCTCCGTGACTAGGAT	TTGGAAATTCAAATGATATA	T	17719
1247_A4	csm2Δ	MMS	IV	626948	611978	SNP	1	G	2	G/T	52.6/47.4	30/27	57	G	52.632	30	T	47.368	27	TCAGCAAGATAAGTAGCCAT	ATGAAATCGTGCTCGACAAT	TCAGCAAGATAAGTAGCCAT	ATGAAATCGTGCTCGACAAT	T	8474
1247_A4	csm2Δ	MMS	IV	634199	619228	SNP	1	A	2	T/A	52.2/47.8	35/32	67	T	52.239	35	A	47.761	32	TGAACGTTGGGTTAAGACTT	TGATGTGGCCGCTGCATCCG	TGAACGTTGGGTTAAGACTT	TGATGTGGCCGCTGCATCCG	T	7251
1247_A4	csm2Δ	MMS	IV	644379	629408	SNP	1	A	2	A/G	50.8/49.2	33/32	65	A	50.769	33	G	49.231	32	ACTTGATGTTCTCTCAAGAT	CCCACAAGTTGTCTCGAAAA	ACTTGATGTTCTCTCAAGAT	CCCACAAGTTGTCTCGAAAA	G	10180
1247_A4	csm2Δ	MMS	IV	688436	667856	SNP	1	A	2	G/A	54.0/46.0	27/23	50	G	54	27	A	46	23	TTATTATCAGCTCCTAGTAA	CAAGAGGAGGTATCAATTCC	TTATTATCAGCTCCTAGTAA	CAAGAGGAGGTATCAATTCC	G	44057
1247_A4	csm2Δ	MMS	IV	694564	673984	SNP	1	T	2	T/A	54.2/45.8	26/22	48	T	54.167	26	A	45.833	22	TTTCATTTTCCAACTATTGA	TAGTAAAATTCAAACATCTT	TTTCATTTTCCAACTATTGA	TAGTAAAATTCAAACATCTT	A	6128
1247_A4	csm2Δ	MMS	IV	719494	698914	SNP	1	A	2	T/A	52.8/47.2	38/34	72	T	52.778	38	A	47.222	34	GAGGTTGAAAATGCAGAAGA	GCTGGAAAAGTGATGCCTTT	GAGGTTGAAAATGCAGAAGA	GCTGGAAAAGTGATGCCTTT	T	24930
1247_A4	csm2Δ	MMS	IV	725768	705188	SNP	1	A	2	A/T	54.8/45.2	40/33	73	A	54.795	40	T	45.205	33	AGAATGTAAATAATCTACCA	TAGAAACAGAAGCTTCGATA	AGAATGTAAATAATCTACCA	TAGAAACAGAAGCTTCGATA	T	6274
1247_A4	csm2Δ	MMS	IV	780191	759611	SNP	1	A	2	A/G	54.7/45.3	35/29	64	A	54.688	35	G	45.312	29	GAAGAGTTGGACATAGAGGA	GAATATTCTGACTAATAGTC	GAAGAGTTGGACATAGAGGA	GAATATTCTGACTAATAGTC	G	54423
1247_A4	csm2Δ	MMS	IV	796322	775742	SNP	1	A	2	A/C	52.0/48.0	39/36	75	A	52	39	C	48	36	ATAGCAGGACAGTATAGTCT	AAGTCTTCATCATCAAATTC	ATAGCAGGACAGTATAGTCT	AAGTCTTCATCATCAAATTC	C	16131
1247_A4	csm2Δ	MMS	IV	827394	806813	SNP	1	T	2	T/C	53.4/46.6	31/27	58	T	53.448	31	C	46.552	27	TTTTAATGCTGTAGAAATTT	CGGTTTTCCTTTTTAATCTT	TTTTAATGCTGTAGAAATTT	CGGTTTTCCTTTTTAATCTT	C	31072
1247_A4	csm2Δ	MMS	IV	827449	806868	SNP	1	C	2	C/A	53.7/46.3	36/31	67	C	53.731	36	A	46.269	31	TGAGATCGCTGAAATCAACT	GCGGGTTAGATTTTCTTATT	TGAGATCGCTGAAATCAACT	GCGGGTTAGATTTTCTTATT	A	55
1247_A4	csm2Δ	MMS	IV	865791	845210	SNP	1	G	2	G/C	54.2/45.8	32/27	59	G	54.237	32	C	45.763	27	TTGTTCGGAATTATGGATAC	TAACAGAATTGGTCTTAAGA	TTGTTCGGAATTATGGATAC	TAACAGAATTGGTCTTAAGA	C	38342
1247_A4	csm2Δ	MMS	IV	1004867	978658	SNP	1	A	2	G/A	53.5/46.5	38/33	71	G	53.521	38	A	46.479	33	TACTACGACCCTGTAGAAAG	CCAGGCGTATCGAATTTAAT	TACTACGACCCTGTAGAAAG	CCAGGCGTATCGAATTTAAT	G	139076
1247_A4	csm2Δ	MMS	IV	1007591	981382	SNP	1	G	2	C/G	50.6/49.4	41/40	81	C	50.617	41	G	49.383	40	ACTACAGGTTTTATGGTTGT	AAAAAGTTCCTTAAAGATTC	ACTACAGGTTTTATGGTTGT	AAAAAGTTCCTTAAAGATTC	C	2724
1247_A4	csm2Δ	MMS	IV	1028151	1001942	SNP	1	T	2	T/A	52.0/48.0	26/24	50	T	52	26	A	48	24	ATAGTAGATAACTTTTCTTC	GTATGTCTAATCTTCTTGAT	ATAGTAGATAACTTTTCTTC	GTATGTCTAATCTTCTTGAT	A	20560
1247_A4	csm2Δ	MMS	IV	1058357	1032148	SNP	1	C	2	C/A	51.1/48.9	23/22	45	C	51.111	23	A	48.889	22	CGCTCAAAGCTTTTTCAATC	TCTTGAAAGATTTAGGATCC	CGCTCAAAGCTTTTTCAATC	TCTTGAAAGATTTAGGATCC	A	30206
1247_A4	csm2Δ	MMS	IV	1061254	1035045	SNP	1	C	2	C/A	50.9/49.1	27/26	53	C	50.943	27	A	49.057	26	ATACATTTATTTTAAATACG	ACAACTCATTTAATTTAGGG	ATACATTTATTTTAAATACG	ACAACTCATTTAATTTAGGG	A	2897
1247_A4	csm2Δ	MMS	IV	1071673	1045464	SNP	1	C	2	G/C	52.9/47.1	27/24	51	G	52.941	27	C	47.059	24	CAGTGGAAGTGTCCAGAAAG	AGTATGTTCCTAATAATAAA	CAGTGGAAGTGTCCAGAAAG	AGTATGTTCCTAATAATAAA	G	10419
1247_A4	csm2Δ	MMS	IV	1095382	1069173	SNP	1	G	2	T/G	51.6/48.4	33/31	64	T	51.562	33	G	48.438	31	AATAAAAATGCGAACTCTGT	GATCGAACACAGGACCTCCA	AATAAAAATGCGAACTCTGT	GATCGAACACAGGACCTCCA	T	23709
1247_A4	csm2Δ	MMS	IV	1138027	1106960	SNP	1	A	2	A/T	50.8/49.2	31/30	61	A	50.82	31	T	49.18	30	AAGAGGAAACTTAAGAACGT	CCAGAAACAAGGTTTGAATT	AAGAGGAAACTTAAGAACGT	CCAGAAACAAGGTTTGAATT	T	42645
1247_A4	csm2Δ	MMS	IV	1158467	1126668	SNP	1	C	2	C/A	54.4/45.6	31/26	57	C	54.386	31	A	45.614	26	CTACGTGGTGGGCAGAAGTC	CTGGAATACTTTAGTGATGG	CTACGTGGTGGGCAGAAGTC	CTGGAATACTTTAGTGATGG	A	20440
1247_A4	csm2Δ	MMS	IV	1202383	1169773	SNP	1	C	2	C/T	52.3/47.7	34/31	65	C	52.308	34	T	47.692	31	CCGAATTGGATAGATACAAA	GGGAAAATCAGTGAGGGGCT	CCGAATTGGATAGATACAAA	GGGAAAATCAGTGAGGGGCT	T	43916
1247_A4	csm2Δ	MMS	IV	1212969	1174594	SNP	1	T	2	C/T	54.7/45.3	35/29	64	C	54.688	35	T	45.312	29	CCTGTTCTCAAACATATTTT	TTTTCATAGTCTTTTTTGGG	CCTGTTCTCAAACATATTTT	TTTTCATAGTCTTTTTTGGG	C	10586
1247_A4	csm2Δ	MMS	IV	1237051	1198676	SNP	1	C	2	C/A	51.0/49.0	25/24	49	C	51.02	25	A	48.98	24	CCAACCATACCAATTTTTTT	AATACTTCAAATCATGGCCT	CCAACCATACCAATTTTTTT	AATACTTCAAATCATGGCCT	A	24082
1247_A4	csm2Δ	MMS	IV	1238063	1199688	SNP	1	T	2	T/A	51.3/48.8	41/39	80	T	51.25	41	A	48.75	39	TTAAATTTAATTTTTCCGAG	TTCATTATGTATTAGTTTCC	TTAAATTTAATTTTTCCGAG	TTCATTATGTATTAGTTTCC	A	1012
1247_A4	csm2Δ	MMS	IV	1288959	1250310	SNP	1	G	2	A/G	52.8/45.8	38/33	72	A	52.778	38	G	45.833	33	AGCGTTATTCAACTTTAGAA	TGTCTTCTCTTCATAAACTA	AGCGTTATTCAACTTTAGAA	TGTCTTCTCTTCATAAACTA	A	50896
1247_A4	csm2Δ	MMS	IV	1292929	1254280	SNP	1	C	2	C/T	52.9/47.1	46/41	87	C	52.874	46	T	47.126	41	AAAATGGAATAAGGACAGGG	AATAATAAAGAGGTTAAAAT	AAAATGGAATAAGGACAGGG	AATAATAAAGAGGTTAAAAT	T	3970
1247_A4	csm2Δ	MMS	IV	1321155	1282478	SNP	1	C	2	C/T	52.6/47.4	41/37	78	C	52.564	41	T	47.436	37	GAAAATGACATAACCATGCC	AACAGCCTTCGCGAATCTGA	GAAAATGACATAACCATGCC	AACAGCCTTCGCGAATCTGA	T	28226
1247_A4	csm2Δ	MMS	IV	1328748	1290071	SNP	1	C	2	G/C	52.7/47.3	39/35	74	G	52.703	39	C	47.297	35	ATATATACTTTTGAAGGAAT	AAAATTAAGCAATTACGCTA	ATATATACTTTTGAAGGAAT	AAAATTAAGCAATTACGCTA	G	7593
1247_A4	csm2Δ	MMS	IV	1332221	1293544	SNP	1	C	2	C/G	53.0/47.0	44/39	83	C	53.012	44	G	46.988	39	TTATAATAATAAATAAAATG	CGTTGAAGCCAAATTCAGTC	TTATAATAATAAATAAAATG	CGTTGAAGCCAAATTCAGTC	G	3473
1247_A4	csm2Δ	MMS	IV	1479396	1440719	SNP	1	T	2	T/C	50.8/49.2	33/32	65	T	50.769	33	C	49.231	32	CCGTTGGCTTACTTCTTTTA	ACTTCTGAGGAAGAATTGGA	CCGTTGGCTTACTTCTTTTA	ACTTCTGAGGAAGAATTGGA	C	147175
1247_A4	csm2Δ	MMS	IV	1488420	1449743	SNP	1	T	2	A/T	51.9/48.1	40/37	77	A	51.948	40	T	48.052	37	CCATTCTACTGTTGCGGTGC	ACCGCAGTCACAACACTTCA	CCATTCTACTGTTGCGGTGC	ACCGCAGTCACAACACTTCA	A	9024
1247_A4	csm2Δ	MMS	IV	1490752	1452075	SNP	1	A	2	A/C	51.7/48.3	31/29	60	A	51.667	31	C	48.333	29	TGATCCATGCTTTGTACGTG	TCAGCTGTCATCCATATGAG	TGATCCATGCTTTGTACGTG	TCAGCTGTCATCCATATGAG	C	2332
1247_A4	csm2Δ	MMS	V	35169	34900	SNP	1	A	2	A/T	54.5/45.5	30/25	55	A	54.545	30	T	45.455	25	CTGTAAATTTGAAGAAGATT	TTGATGTCAACTGGGATCCA	CTGTAAATTTGAAGAAGATT	TTGATGTCAACTGGGATCCA	T
1247_A4	csm2Δ	MMS	V	50895	50626	SNP	1	T	2	T/A	52.4/47.6	43/39	82	T	52.439	43	A	47.561	39	AGCAACAAATAAGTTGACAG	CCCTCATTTGTCAGAGTCAG	AGCAACAAATAAGTTGACAG	CCCTCATTTGTCAGAGTCAG	A	15726
1247_A4	csm2Δ	MMS	V	133945	133676	SNP	1	A	2	T/A	51.5/48.5	35/33	68	T	51.471	35	A	48.529	33	TGATTGATACTGCACATTCT	TGGGCATCCTAGTTTTATTG	TGATTGATACTGCACATTCT	TGGGCATCCTAGTTTTATTG	T	83050
1247_A4	csm2Δ	MMS	V	135057	134788	SNP	1	A	2	G/A	51.2/48.8	42/40	82	G	51.22	42	A	48.78	40	GATTATAGAGTTGGTGTCGA	AAAGCTGGTACTTATCACAT	GATTATAGAGTTGGTGTCGA	AAAGCTGGTACTTATCACAT	G	1112
1247_A4	csm2Δ	MMS	V	155370	155101	SNP	1	A	2	T/A	54.9/45.1	45/37	82	T	54.878	45	A	45.122	37	CATATGTCTACTGATAAGAA	ACTTTACTTTGGGTTAACGG	CATATGTCTACTGATAAGAA	ACTTTACTTTGGGTTAACGG	T	20313
1247_A4	csm2Δ	MMS	V	159298	159029	SNP	1	G	2	T/G	51.1/48.9	45/43	88	T	51.136	45	G	48.864	43	ATAACCAAGCAGCACGAAAT	GATAGTGCACCACGAGACTT	ATAACCAAGCAGCACGAAAT	GATAGTGCACCACGAGACTT	T	3928
1247_A4	csm2Δ	MMS	V	183951	183682	SNP	1	C	2	G/C	53.4/46.6	39/34	73	G	53.425	39	C	46.575	34	AGTGCCATCCAGGGAGGTAA	CATTAATGCAGTCAAAGATG	AGTGCCATCCAGGGAGGTAA	CATTAGTGCAGTCAAAGATG	G	24653
1247_A4	csm2Δ	MMS	V	235142	234865	SNP	1	G	2	G/T	54.2/45.8	39/33	72	G	54.167	39	T	45.833	33	CTCTTATAAGAGAGTTTGTG	TGGTGACACAGATTTTGCGG	CTCTTATAAGAGAGTTTGTG	TGGTGACACAGATTTTGCGG	T	51191
1247_A4	csm2Δ	MMS	V	235819	235542	SNP	1	A	2	A/G	54.2/45.8	32/27	59	A	54.237	32	G	45.763	27	GACCTTCTTCTGGAATACCC	AGTATTCAGATTGGACTTTA	GACCTTCTTCTGGAATACCC	AGTATTCAGATTGGACTTTA	G	677
1247_A4	csm2Δ	MMS	V	274228	273951	SNP	1	C	2	T/C	51.2/48.8	21/20	41	T	51.22	21	C	48.78	20	TATGGAGCAGTCAAAATTGA	TGCTAACTGAGTTTTCATTT	TATGGAGCAGTCAAAATTGA	TGCTAACTGAGTTTTCATTT	T	38409
1247_A4	csm2Δ	MMS	V	297364	297087	SNP	1	C	2	C/A	53.8/46.2	28/24	52	C	53.846	28	A	46.154	24	TGTATCAGAATCAGACTGGG	TTACGGTTTGCCAGAATTGA	TGTATCAGAATCAGACTGGG	TTACGGTTTGCCAGAATTGA	A	23136
1247_A4	csm2Δ	MMS	V	298992	298715	SNP	1	T	2	A/T	51.6/48.4	32/30	62	A	51.613	32	T	48.387	30	GTCGTAAAGAACCTGTCCAA	TCGATAAGATTACCGCTCGT	GTCGTAAAGAACCTGTCCAA	TCGATAAGATTACCGCTCGT	A	1628
1247_A4	csm2Δ	MMS	V	302792	302515	SNP	1	C	2	C/G	50.0/50.0	43/43	86	C	50	43	G	50	43	AATACGATTAAACACTACGC	AGATTTCCACAATATGTCTT	AATACGATTAAACACTACGC	AGATTTCCACAATATGTCTT	G	3800
1247_A4	csm2Δ	MMS	V	308933	308656	SNP	1	T	2	C/T	54.5/45.5	30/25	55	C	54.545	30	T	45.455	25	AATCAGGCCAATTTTTCACC	GAATCTGTAACAATTCATAA	AATCAGGCCAATTTTTCACC	GAATCTGTAACAATTCATAA	C	6141
1247_A4	csm2Δ	MMS	V	328264	327987	SNP	1	T	2	A/T	53.0/47.0	35/31	66	A	53.03	35	T	46.97	31	TTGACGCGAAAAAGAAAAAA	AAGAAGGGCAAAAAGAAAAA	TTGACGCGAAAAAGAAAAAA	AAGAAGGGCAAAAAGAAAAA	A	19331
1247_A4	csm2Δ	MMS	V	340456	340179	SNP	1	C	2	C/G	50.8/49.2	31/30	61	C	50.82	31	G	49.18	30	TTGGGAAAGACCATCTCAAA	AGGTAATTGGACCAGTCAAC	TTGGGAAAGACCATCTCAAA	AGGTAATTGGACCAGTCAAC	G	12192
1247_A4	csm2Δ	MMS	V	426713	426392	SNP	1	T	2	T/C	52.7/47.3	29/26	55	T	52.727	29	C	47.273	26	CATTACTGTCATCCGTGTAG	GTATTGATTGCGCCATTGAA	CATTACTGTCATCCGTGTAG	GTATTGATTGCGCCATTGAA	C	86257
1247_A4	csm2Δ	MMS	V	435066	434745	SNP	1	A	2	A/G	52.9/47.1	37/33	70	A	52.857	37	G	47.143	33	ATCCAAAGGAATCTTCAGTA	ATTTGTTGGAATAGAAATTA	ATCCAAAGGAATCTTCAGTA	ATTTGTTGGAATAGAAATTA	G	8353
1247_A4	csm2Δ	MMS	V	473423	468158	SNP	1	T	2	T/A	51.9/48.1	42/39	81	T	51.852	42	A	48.148	39	TTGCAAACGTCGGGATGCAG	ACATAACGTACCTGTAGACC	TTGCAAACGTCGGGATGCAG	ACATAACGTACCTGTAGACC	A	38357
1247_A4	csm2Δ	MMS	VI	51535	51133	SNP	1	A	2	T/A	52.8/47.2	47/42	89	T	52.809	47	A	47.191	42	AATGAGTACTTCAAGTATCC	ACTCCTTTACAACAAGGTTT	AATGAGTACTTCAAGTATCC	ACTCCTTTACAACAAGGTTT	T
1247_A4	csm2Δ	MMS	VI	89287	88884	SNP	1	T	2	T/A	51.4/48.6	38/36	74	T	51.351	38	A	48.649	36	TTTAGGGAAACGTTCTCACG	TTAGCAACAAGCAGGGCCAA	TTTAGGGAAACGTTCTCACG	TTAGCAACAAGCAGGGCCAA	A	37752
1247_A4	csm2Δ	MMS	VI	114441	114044	SNP	1	T	2	A/T	50.6/49.4	41/40	81	A	50.617	41	T	49.383	40	GTTAGTAAACACACATATTA	TTTCGGGTAGTCCTGTCGAT	GTTAGTAAACACACATATTA	TTTCGGGTAGTCCTGTCGAT	A	25154
1247_A4	csm2Δ	MMS	VI	165207	159964	SNP	1	C	2	A/C	51.6/48.4	33/31	64	A	51.562	33	C	48.438	31	CCAAGTGCCCGCCAAAAATA	ATGGTTAAAGGTGGCTTGTC	CCAAGTGCCCGCCAAAAATA	ATGGTTAAAGGTGGCTTGTC	A	50766
1247_A4	csm2Δ	MMS	VI	215747	210505	SNP	1	A	2	G/A	51.1/48.9	46/44	90	G	51.111	46	A	48.889	44	GAACTTGTTACTATCATTGA	CCATTGAAGAGAAGAGAATA	GAACTTGTTACTATCATTGA	CCATTGAAGAGAAGAGAATA	G	50540
1247_A4	csm2Δ	MMS	VI	236121	230879	SNP	1	A	2	G/A	53.3/46.7	40/35	75	G	53.333	40	A	46.667	35	CACTGATCACGACCTAAAAA	TAACAACGGTAAAATAGATA	CACTGATCACGACCTAAAAA	TAACAACGGTAAAATAGATA	G	20374
1247_A4	csm2Δ	MMS	VI	245729	240488	SNP	1	T	2	C/T	52.3/47.7	34/31	65	C	52.308	34	T	47.692	31	GAAGGTTAATCTTGAAAAAT	TGCGATTAGTAGACAAGTTT	GAAGGTTAATCTTGAAAAAT	TGCGATTAGTAGACAAGTTT	C	9608
1247_A4	csm2Δ	MMS	VI	245749	240508	SNP	1	T	2	T/C	53.7/46.3	36/31	67	T	53.731	36	C	46.269	31	TTGCGATTAGTAGACAAGTT	ATTCTCACAAGAACAAAATA	CTGCGATTAGTAGACAAGTT	ATTCTCACAAGAACAAAATA	C	20
1247_A4	csm2Δ	MMS	VI	249962	244721	SNP	1	T	2	C/T	50.0/50.0	49/49	98	C	50	49	T	50	49	TACTTTACTATGTGGGTACG	ATTTAAGGTGGCAAATTCTA	TACTTTACTATGTGGGTACG	ATTTAAGGTGGCAAATTCTA	C	4213
1247_A4	csm2Δ	MMS	VI	264102	258860	SNP	1	A	2	T/A	51.6/48.4	49/46	95	T	51.579	49	A	48.421	46	GAAGACAAGGACATATAAAA	GAAAGACTGCTCTAGTGTTG	GAAGACAAGGACATATAAAA	GAAAGACTGCTCTAGTGTTG	T	14140
1247_A4	csm2Δ	MMS	VII	15111	8614	SNP	1	A	2	A/G	50.0/50.0	37/37	74	A	50	37	G	50	37	CTGTCTATTGCAAAACAACC	TCAACAACAAGTTTACATTT	CTGTCTATTGCAAAACAACC	TCAACAACAAGTTTACATTT	G
1247_A4	csm2Δ	MMS	VII	41489	34995	SNP	1	A	2	A/G	53.8/46.2	42/36	78	A	53.846	42	G	46.154	36	TGCACTAATTTGTTGAGAGC	CTATAGAAATGTCTGATTTA	TGCACTAATTTGTTGAGAGC	CTATAGAAATGTCTGATTTA	G	26378
1247_A4	csm2Δ	MMS	VII	110098	103607	SNP	1	G	2	G/C	53.7/46.3	51/44	95	G	53.684	51	C	46.316	44	AAGATCTTCACTCCTGATCA	ATCTCTAAAGTTGTGCAGCC	AAGATCTTCACTCCTGATCA	ATCTCTAAAGTTGTGCAGCC	C	68609
1247_A4	csm2Δ	MMS	VII	114349	107858	SNP	1	C	2	C/A	55.0/45.0	44/36	80	C	55	44	A	45	36	GCCGGATTCGACCAAGGCAC	ATCCATGGAAGAGCAACCGG	GCCGGATTCGACCAAGGCAC	ATCCATGGAAGAGCAACCGG	A	4251
1247_A4	csm2Δ	MMS	VII	122325	115834	SNP	1	G	2	G/A	53.2/46.8	41/36	77	G	53.247	41	A	46.753	36	AATCATAAGGTTAGGGGTTC	AGCCCCCTACAGGGCTATTC	AATCATAAGGTTAGGGGTTC	AGCCCCCTACAGGGCTATTC	A	7976
1247_A4	csm2Δ	MMS	VII	129366	122875	SNP	1	A	2	A/G	50.0/50.0	56/56	112	A	50	56	G	50	56	TGTGAACAGATTCAACCGAA	TTACCCGGTGAATATGACTA	TGTGAACAGATTCAACCGAA	TTACCCGGTGAATATGACTA	G	7041
1247_A4	csm2Δ	MMS	VII	131113	124622	SNP	1	G	2	G/T	53.2/46.8	42/37	79	G	53.165	42	T	46.835	37	GACAATTTCCATATTATTTC	TGGTAAACAGCGAAGGCATT	GACAATTTCCATATTATTTC	TGGTAAACAGCGAAGGCATT	T	1747
1247_A4	csm2Δ	MMS	VII	131314	124823	SNP	1	G	2	A/G	54.9/45.1	45/37	82	A	54.878	45	G	45.122	37	TAAGCTTCCGCATTACCTGC	AGCTGGTAATTGTAATACAG	TAAGCTTCCGCATTACCTGC	AGCTGGTAATTGTAATACAG	A	201
1247_A4	csm2Δ	MMS	VII	150678	144187	SNP	1	T	2	T/C	52.4/47.6	33/30	63	T	52.381	33	C	47.619	30	TTGGAAGAAGCGAAGTATTT	ATCCTTGAGTGTGTCTTATT	TTGGAAGAAGCGAAGTATTT	ATCCTTGAGTGTGTCTTATT	C	19364
1247_A4	csm2Δ	MMS	VII	220338	213847	SNP	1	A	2	A/T	51.3/48.7	39/37	76	A	51.316	39	T	48.684	37	TCCTTTTTGATGTTTTGAAA	CATTAGAATATAAACTAGCC	TCCTTTTTGATGTTTTGAAA	CATTAGAATATAAACTAGCC	T	69660
1247_A4	csm2Δ	MMS	VII	252063	245572	SNP	1	C	2	C/G	51.3/48.8	41/39	80	C	51.25	41	G	48.75	39	TTTGAGCTAGCCTTAAAAGT	GGCCAACTTACGCTTGCTCG	TTTGAGCTAGCCTTAAAAGT	GGCCAACTTACGCTTGCTCG	G	31725
1247_A4	csm2Δ	MMS	VII	253300	246809	SNP	1	C	2	C/T	53.7/46.3	36/31	67	C	53.731	36	T	46.269	31	TTTCTCGTTCTATTAGGGTA	TATTCGTATTCGGAGTTTCA	TTTCTCGTTCTATTAGGGTA	TATTCGTATTCGGAGTTTCA	T	1237
1247_A4	csm2Δ	MMS	VII	291441	284950	SNP	1	G	2	A/G	52.2/47.8	35/32	67	A	52.239	35	G	47.761	32	CCACATTGGCCACAGTGGGA	GAGATGAAAACTTAAAATTT	CCACATTGGCCACAGTGGGA	GAGATGAAAACTTAAAATTT	A	38141
1247_A4	csm2Δ	MMS	VII	306118	299621	SNP	1	T	2	A/T	53.3/46.7	40/35	75	A	53.333	40	T	46.667	35	AAAACGCCCTTAGGTACATT	TTATGAAATATCGGACTGGA	AAAACGCCCTTAGGTACATT	TTATGAAATATCGGACTGGA	A	14677
1247_A4	csm2Δ	MMS	VII	315522	309021	SNP	1	G	2	A/G	52.0/48.0	26/24	50	A	52	26	G	48	24	ATAAAGAAGGGTTCGATGCT	ATGAAAAAGTTATGGAAAAA	ATGAAGAAGGGTTCGATGCT	ATGAAAAAGTTATGGAAAAA	A	9404
1247_A4	csm2Δ	MMS	VII	342017	335517	SNP	1	C	2	C/G	50.0/50.0	37/37	74	C	50	37	G	50	37	ATATTATAAAACGATTTGAC	TCTAATGCACTTCCTTTTAT	ATATTATAAAACGATTTGAC	TCTAATGCACTTCCTTTTAT	G	26495
1247_A4	csm2Δ	MMS	VII	397321	390821	SNP	1	A	2	C/A	50.6/49.4	42/41	83	C	50.602	42	A	49.398	41	CAATTTGTTCTGTTCCACCA	ATTTGACAGAGGAGTGTGTT	CAATTTGTTCTGTTCCACCA	ATTTGACAGAGGAGTGTGTT	C	55304
1247_A4	csm2Δ	MMS	VII	399211	392711	SNP	1	G	2	A/G	51.4/48.6	36/34	70	A	51.429	36	G	48.571	34	AGGGTCCGCTAAATGGTGGG	CCACTCTCACAGAATTCACC	AGGGTCCGCTAAATGGTGGG	CCACTCTCACAGAATTCACC	A	1890
1247_A4	csm2Δ	MMS	VII	412317	405818	SNP	1	G	2	G/T	52.4/47.6	33/30	63	G	52.381	33	T	47.619	30	TTTCGCCCAGGATCGAACTG	GGACGTTCTGCGTGTTAAGC	TTTCGCCCAGGATCGAACTG	GGACGTTCTGCGTGTTAAGC	T	13106
1247_A4	csm2Δ	MMS	VII	412337	405838	SNP	1	C	2	C/T	50.0/50.0	34/34	68	C	50	34	T	50	34	GGGACGTTCTGCGTGTTAAG	AGATGCCATAACCGACTAGA	GGGACGTTCTGCGTGTTAAG	AGATGCCATAACCGACTAGA	T	20
1247_A4	csm2Δ	MMS	VII	417259	410760	SNP	1	T	2	T/A	53.2/46.8	42/37	79	T	53.165	42	A	46.835	37	CTTCACTAGCCCACCTTAAC	TTACGGACCTTCTTTTGAAA	CTTCACTAGCCCACCTTAAC	TTACGGACCTTCTTTTGAAA	A	4922
1247_A4	csm2Δ	MMS	VII	425505	419006	SNP	1	C	2	A/C	50.7/49.3	38/37	75	A	50.667	38	C	49.333	37	TGTTATTGGTAGAACCATCA	ATCATCAACGATAACTGGTT	TGTTATTGGTAGAACCATCA	ATCATCAACGATAACTGGTT	A	8246
1247_A4	csm2Δ	MMS	VII	461281	454782	SNP	1	C	2	C/A	52.3/47.7	34/31	65	C	52.308	34	A	47.692	31	TATAGCGAACCTCCGAATGT	AAGAAACGTATTTGTGACGT	TATAGCGAACCTCCGAATGT	AAGAAACGTATTTGTGACGT	A	35776
1247_A4	csm2Δ	MMS	VII	473928	467429	SNP	1	G	2	G/C	54.1/45.9	46/39	85	G	54.118	46	C	45.882	39	CAGAAAAATGCCTTCAGAAA	CAAATGTCTGGTGACAAGAC	CAGAAAAATGCCTTCAGAAA	CAAATGTCTGGTGACAAGAC	C	12647
1247_A4	csm2Δ	MMS	VII	477235	470736	SNP	1	A	2	T/A	52.6/47.4	30/27	57	T	52.632	30	A	47.368	27	CGAATTCTCTAATATCTACG	AGTGACCTGCGATACCTGCA	CGAATTCTCTAATATCTACG	AGTGACCTGCGATACCTGCA	T	3307
1247_A4	csm2Δ	MMS	VII	477855	471356	SNP	1	G	2	A/G	52.3/47.7	23/21	44	A	52.273	23	G	47.727	21	GCAACAGCCTTTTCCCATTC	GCACCTTTTGGAGCCAAAGG	GCAACAGCCTTTTCCCATTC	GCACCTTTTGGAGCCAAAGG	A	620
1247_A4	csm2Δ	MMS	VII	483426	476927	SNP	1	G	2	C/G	52.9/47.1	27/24	51	C	52.941	27	G	47.059	24	TTCTCGCAGGAGTTTCTCCG	CCATGTGCGGCTGGTTCTAC	TTCTCGCAGGAGTTTCTCCG	CCATGTGCGGCTGGTTCTAC	C	5571
1247_A4	csm2Δ	MMS	VII	487494	480995	SNP	1	G	2	C/G	54.0/46.0	27/23	50	C	54	27	G	46	23	CGATAAAAATACAAATGGTA	TAAAAATATGTCAAAAAATT	CGATAAAAATACAAATGGTA	TAAAAATATGTCAAAAAATT	C	4068
1247_A4	csm2Δ	MMS	VII	497869	491371	SNP	1	G	2	G/T	53.4/46.6	47/41	88	G	53.409	47	T	46.591	41	CGTCGTAAAGCTTTTGAAAG	CTTCTTGATGTTGTTGTTCC	CGTCGTAAAGCTTTTGAAAG	CTTCTTGATGTTGTTGTTCC	T	10375
1247_A4	csm2Δ	MMS	VII	526440	519942	SNP	1	A	2	A/T	51.6/48.4	33/31	64	A	51.562	33	T	48.438	31	GAAAACTTTCAAAACTTGAG	GGTAAAGGAAGAGGCACATT	GAAAACTTTCAAAACTTGAG	GGTAAAGGAAGAGGCACATT	T	28571
1247_A4	csm2Δ	MMS	VII	561673	552321	SNP	1	G	2	G/T	52.7/47.3	39/35	74	G	52.703	39	T	47.297	35	CAAAAATAACGACAACTGCA	GACTCGAACCTGCGCGGGCA	CAAAAATAACGACAACTGCA	GACTCGAACCTGCGCGGGCA	T	35233
1247_A4	csm2Δ	MMS	VII	617715	602001	SNP	1	G	2	G/T	53.7/46.3	36/31	67	G	53.731	36	T	46.269	31	GCGACGTACATTCCATTGTA	AAACACCTGCCTCTTCAAAA	GCGACGTACATTCCATTGTA	AAACACCTGCCTCTTCAAAA	T	56042
1247_A4	csm2Δ	MMS	VII	702228	686514	SNP	1	A	2	T/A	54.1/45.9	33/28	61	T	54.098	33	A	45.902	28	TACGTAGCAAGCCAAGTTCA	TCGGTAATCTATAGGTTCGG	TACGTAGCAAGCCAAGTTCA	TCGGTAATCTATAGGTTCGG	T	84513
1247_A4	csm2Δ	MMS	VII	722285	705782	SNP	1	C	2	A/C	52.1/47.9	25/23	48	A	52.083	25	C	47.917	23	GTATGAGGACATAAAATATG	CATCAATAGAACTCCAATGC	GTATGAGGACATAAAATATG	CATCAATAGAACTCCAATGC	A	20057
1247_A4	csm2Δ	MMS	VII	727180	710661	SNP	1	A	2	T/A	50.6/49.4	41/40	81	T	50.617	41	A	49.383	40	ATCAGTTTGGAGAGGCTTAA	ATGACACGTCACAGTGATAA	ATCAGTTTGGAGAGGCTTAA	ATGACACGTCACAGTGATAA	T	4895
1247_A4	csm2Δ	MMS	VII	731712	715195	SNP	1	A	2	A/T	50.8/49.2	31/30	61	A	50.82	31	T	49.18	30	CGCCTCCTCTGCCTCTTCTG	TATTCTTAGCCTCATACCGG	CGCCTCCTCTGCCTCTTCTG	TATTCTTAGCCTCATACCGG	T	4532
1247_A4	csm2Δ	MMS	VII	735893	719375	SNP	1	C	2	C/G	50.0/50.0	28/28	56	C	50	28	G	50	28	CAACTATCGCAAAATTCACC	ATATTCCAATCTTGTGCGCT	CAACTATCGCAAAATTCACA	AAATTCCAATCTTGTGCGCT	G	4181
1247_A4	csm2Δ	MMS	VII	758932	742362	SNP	1	A	2	A/T	54.1/45.9	33/28	61	A	54.098	33	T	45.902	28	TATGTGTTTTAACATGCAAA	AATTATTGATGCTACCATGT	TATGTGTTTTAACATGCAAA	AATTATTGATGCTACCATGT	T	23039
1247_A4	csm2Δ	MMS	VII	780709	764139	SNP	1	G	2	G/T	50.0/50.0	40/40	80	G	50	40	T	50	40	AAGTTCAGTTGCACCAGGTG	TGGTAGTTGGTTGGGTGGTC	AAGTTCAGTTGCACCAGGTG	TGGTAGTTGGTTGGGTGGTC	T	21777
1247_A4	csm2Δ	MMS	VII	828750	802436	SNP	1	T	2	T/C	50.7/49.3	37/36	73	T	50.685	37	C	49.315	36	GATGGGGGTCGAACCCATAA	CTTCTGATTAGAAGTCAGAC	GATGGGGGTCGAACCCATAA	CTTCTGATTAGAAGTCAGAC	C	48041
1247_A4	csm2Δ	MMS	VII	845624	819316	SNP	1	T	2	T/G	52.2/47.8	36/33	69	T	52.174	36	G	47.826	33	GACATTACCCCATTGCATGA	GCAATAATCTCATATAAATA	GACATTACCCCATTGCATGA	GCAATAATCTCATATAAATA	G	16874
1247_A4	csm2Δ	MMS	VII	858805	832497	SNP	1	T	2	T/A	54.4/45.6	31/26	57	T	54.386	31	A	45.614	26	TAATTCTCTTTTTCCTTTAG	AGAATATAAAATTATAATAA	TAATTCTCTTTTTCCTTTAG	AGAATATAAAATTATAATAA	A	13181
1247_A4	csm2Δ	MMS	VII	883859	857551	SNP	1	A	2	A/T	53.8/46.2	35/30	65	A	53.846	35	T	46.154	30	ACTAAGTTCTTGGTGTTTTA	AACTAAAAAAAAGACTAACT	ACTAAGTTCTTGGTGTTTTA	AACTAAAAAAAAGACTAACT	T	25054
1247_A4	csm2Δ	MMS	VII	907339	881031	SNP	1	T	2	A/T	51.4/48.6	36/34	70	A	51.429	36	T	48.571	34	CGCTATTGACACTAGAATGT	CCATGAGACCACTCAAAAGA	CGCTATTGACACTAGAATGT	CCATGAGACCACTCAAAAGA	A	23480
1247_A4	csm2Δ	MMS	VII	907595	881287	SNP	1	C	2	C/G	50.0/50.0	32/32	64	C	50	32	G	50	32	CAAATCACCATTGGTCAAGC	CCTACCGAGAAGAACCACAC	CAAATCACCATTGGTCAAGC	CCTACCGAGAAGAACCACAC	G	256
1247_A4	csm2Δ	MMS	VII	959869	933561	SNP	1	C	2	A/C	50.0/50.0	29/29	58	A	50	29	C	50	29	TATTCTTGTTCATTTTTTAC	ATTTTCAACAAACCACACAA	TATTCTTGTTCATTTTTTAC	ATTTTCAACAAACCACACAA	A	52274
1247_A4	csm2Δ	MMS	VII	1004164	977874	SNP	1	T	2	T/A	52.2/47.8	48/44	92	T	52.174	48	A	47.826	44	AAGGAGAAACAATAGCAGCA	AAATCTTGTTCGATAAAACA	AAGGAGAAACAATAGCAGCA	AAATCTTGTTCGATAAAACA	A	44295
1247_A4	csm2Δ	MMS	VII	1055105	1028804	SNP	1	C	2	C/T	54.2/45.8	39/33	72	C	54.167	39	T	45.833	33	CGGAATGCTTGCTAATAAAA	CAGAATTTTAGCAACGCATC	CGGAATGCTTGCTAATAAAA	CAGAATTTTAGCAACGCATC	T	50941
1247_A4	csm2Δ	MMS	VII	1076780	1050479	SNP	1	T	2	T/C	53.1/46.9	51/45	96	T	53.125	51	C	46.875	45	TGCTATTTGGGTTTGTCCGT	TTATGACTCTCCTCAACAAG	TGCTATTTGGGTTTGTCCGT	TTATGACTCTCCTCAACAAG	C	21675
1247_A4	csm2Δ	MMS	VII	1083520	1057219	SNP	1	T	2	T/C	50.4/49.6	70/69	139	T	50.36	70	C	49.64	69	AAGATAGGGTGAAGTAAAAG	ATCTGTATGACTATAGAGTG	AAGATAGGGTGAAGTAAAAG	ATCTGTATGACTATAGAGTG	C	6740	Complex
1247_A4	csm2Δ	MMS	VII	1083521	1057220	SNP	1	A	2	G/A	50.4/49.6	70/69	139	G	50.36	70	A	49.64	69	AGATAGGGTGAAGTAAAAGT	TCTGTATGACTATAGAGTGC	AGATAGGGTGAAGTAAAAGT	TCTGTATGACTATAGAGTGC	G	1	Complex
1247_A4	csm2Δ	MMS	VIII	24264	24267	SNP	1	T	2	A/T	50.0/50.0	37/37	74	A	50	37	T	50	37	GTTCCATTTCATTTCTGAAA	TACCAGTGCGGAATATGTTT	GTTCCATTTCATTTCTGAAA	TACCAGTGCGGAATATGTTT	A
1247_A4	csm2Δ	MMS	VIII	35295	35299	SNP	1	G	2	G/T	52.6/47.4	41/37	78	G	52.564	41	T	47.436	37	TAGCTCTCTTGTCCATCTTG	CTTGAGCCTTGTTACCAAGG	TAGCTCTCTTGTCCATCTTG	CTTGAGCCTTGTTACCAAGG	T	11031
1247_A4	csm2Δ	MMS	VIII	55297	55299	SNP	1	A	2	A/T	51.4/48.6	36/34	70	A	51.429	36	T	48.571	34	AGATATCTCATGCAAAAACA	CACGAAATGAAAACACAAGC	AGATATCTCATGCAAAAACA	CACGAAATGAAAACACAAGC	T	20002
1247_A4	csm2Δ	MMS	VIII	67308	67310	SNP	1	G	2	C/G	50.6/49.4	44/43	87	C	50.575	44	G	49.425	43	CCAAAATGTTTAGCGGCGTC	TAGACGACTCACTTGCCGGC	CCAAAATGTTTAGCGGCGTC	TAGACGACTCACTTGCCGGC	C	12011
1247_A4	csm2Δ	MMS	VIII	171344	165530	SNP	1	C	2	A/C	51.2/48.8	43/41	84	A	51.19	43	C	48.81	41	AATTTCCTTCATTTTCACCA	CAGCGATTCTGTAACAAAAA	AATTTCCTTCATTTTCACCA	CAGCGATTCTGTAACAAAAA	A	104036
1247_A4	csm2Δ	MMS	VIII	178071	172257	SNP	1	C	2	C/A	52.8/47.2	28/25	53	C	52.83	28	A	47.17	25	TTCTTCCATGCATATGAATT	AAGAATTCCTAGTTTTTTTC	TTCTTCCATGCATATGAATT	AAGAATTCCTAGTTTTTTTC	A	6727
1247_A4	csm2Δ	MMS	VIII	198843	193029	SNP	1	G	2	G/C	54.2/45.8	26/22	48	G	54.167	26	C	45.833	22	TGTCTAAGGCTTGAGCCAGG	TTTGATCAAAACCTTTAGTG	TGTCTAAGGCTTGAGCCAGG	TTTGATCAAAACCTTTAGTG	C	20772
1247_A4	csm2Δ	MMS	VIII	209747	203933	SNP	1	A	2	A/T	52.9/47.1	45/40	85	A	52.941	45	T	47.059	40	GAAATCCAGTTATAAATAGA	CTTTATTGAGAGCCAGACCT	GAAATCCAGTTATAAATAGA	CTTTATTGAGAGCCAGACCT	T	10904
1247_A4	csm2Δ	MMS	VIII	231540	223892	SNP	1	C	2	C/A	51.6/48.4	33/31	64	C	51.562	33	A	48.438	31	CTTTGAATCCGCACCGAATT	ATTGGGACAAAGAGTACAGT	CTTTGAATCCGCACCGAATT	ATTGGGACAAAGAGTACAGT	A	21793
1247_A4	csm2Δ	MMS	VIII	245141	237493	SNP	1	C	2	C/A	54.4/45.6	43/36	79	C	54.43	43	A	45.57	36	TTAAGGTTTCGATAATCCCA	CACCTTCGAGCAATCGCAAG	TTAAGGTTTCGATAATCCCA	CACCTTCGAGCAATCGCAAG	A	13601
1247_A4	csm2Δ	MMS	VIII	273234	265586	SNP	1	C	2	T/C	52.9/47.1	37/33	70	T	52.857	37	C	47.143	33	GTTAAGTGGTTCGATAGTCA	TCCATTGGACGTAGAAAACT	GTTAAGTGGTTCGATAGTCA	TCCATTGGACGTAGAAAACT	T	28093
1247_A4	csm2Δ	MMS	VIII	291178	283530	SNP	1	G	2	T/G	52.9/47.1	36/32	68	T	52.941	36	G	47.059	32	TGGCACCAGTAATAAATGGG	TGAAGAAACTAATCAAGAAA	TGGCACCAGTAATAAATGGG	TGAAGAAACTAATCAAGAAA	T	17944
1247_A4	csm2Δ	MMS	VIII	378746	371098	SNP	1	G	2	G/T	51.6/48.4	32/30	62	G	51.613	32	T	48.387	30	GCCCACAGGAACAGTGTAAG	AGGGAAAACACCAGAATACA	GCCCACAGGAACAGTGTAAG	AGGGAAAACACCAGAATACA	T	87568
1247_A4	csm2Δ	MMS	VIII	384003	376356	SNP	1	T	2	G/T	50.6/49.4	39/38	77	G	50.649	39	T	49.351	38	GGTTTTTAGGTTTCAATTTA	GGGAAGATGGGACTACAAAG	GGTTTTTAGGTTTCAATTTA	GGGAAGATGGGACTACAAAG	G	5257
1247_A4	csm2Δ	MMS	VIII	445250	437603	SNP	1	C	2	C/G	51.4/48.6	36/34	70	C	51.429	36	G	48.571	34	ACCGCGAAGCAAATGTACCT	CTGAAGAGCATGAAATGGAT	ACCGCGAAGCAAATGTACCT	CTGAAGAGCATGAAATGGAT	G	61247
1247_A4	csm2Δ	MMS	VIII	446270	438623	SNP	1	C	2	T/C	54.2/45.8	39/33	72	T	54.167	39	C	45.833	33	GTGTGTATACTGGATGCAGA	GATGAAATAGTAAATTATGA	GTGTGTATACTGGATGCAGA	GATGAAATAGTAAATTATGA	T	1020
1247_A4	csm2Δ	MMS	VIII	471103	463456	SNP	1	C	2	C/A	54.8/45.2	51/42	93	C	54.839	51	A	45.161	42	TTGGCCAATGAAGCTAAGGG	CAAATCTATCATCGGTGCTA	TTGGCCAATGAAGCTAAGGG	AAATCTATCATCGGTGCTAC	A	24833
1247_A4	csm2Δ	MMS	VIII	482695	475046	SNP	1	C	2	C/G	51.2/48.8	42/40	82	C	51.22	42	G	48.78	40	GTAACTTTAGTAGTGTCCGT	GATTCTAAAATAAAGTCGTA	GTAACTTTAGTAGTGTCCGT	GATTCTAAAATAAAGTCGTA	G	11592
1247_A4	csm2Δ	MMS	VIII	519977	512328	SNP	1	T	2	A/T	51.1/48.9	46/44	90	A	51.111	46	T	48.889	44	ACAACCAACGGGAAATTTTG	TGAATTACGGTGGTGAAAAG	ACAACCAACGGGAAATTTTG	TGAATTACGGTGGTGAAAAG	A	37282
1247_A4	csm2Δ	MMS	IX	32973	16343	SNP	1	C	2	G/C	54.9/45.1	56/46	102	G	54.902	56	C	45.098	46	GCAAATGTAGCCTATTTGCT	GAGGTTTTTCTTTCTTACGA	GCAAATGTAGCCTATTTGCT	GAGGTTTTTCTTTCTTACGA	G
1247_A4	csm2Δ	MMS	IX	35311	18681	SNP	1	C	2	T/C	50.7/49.3	37/36	73	T	50.685	37	C	49.315	36	CAAAATTCCAATTTCTTACG	GCATAGCAGTCGATACATGC	CAAAATTCCAATTTCTTACG	GCATAGCAGTCGATACATGC	T	2338
1247_A4	csm2Δ	MMS	IX	63086	46457	SNP	1	T	2	T/A	50.6/49.4	43/42	85	T	50.588	43	A	49.412	42	TAACCTTTTTGGTGTCTGGA	CAGAAGATGTACCGCTCTCA	TAACCTTTTTGGTGTCTGGA	CAGAAGATGTACCGCTCTCA	A	27775
1247_A4	csm2Δ	MMS	IX	72783	56154	SNP	1	T	2	T/C	51.4/48.6	38/36	74	T	51.351	38	C	48.649	36	GTTCTAAAGCAGTTGTATCG	TGAACACACTTTTCAGACCC	GTTCTAAAGCAGTTGTATCG	TGAACACACTTTTCAGACCC	C	9697
1247_A4	csm2Δ	MMS	IX	102232	85065	SNP	1	A	2	A/T	53.3/46.7	32/28	60	A	53.333	32	T	46.667	28	TTGTTCCCTACTGGTAACAG	CATTTATTATTACTGTGTCT	TTGTTCCCTACTGGTAACAG	CATTTATTATTACTGTGTCT	T	29449
1247_A4	csm2Δ	MMS	IX	128509	111345	SNP	1	C	2	C/G	50.8/49.2	32/31	63	C	50.794	32	G	49.206	31	CTCAACATCTCAAGGGGCAT	CTCCTCCTCCTCCTCCTCCT	CTCAACATCTCAAGGGGCAT	CTCCTCCTCCTCCTCCTCCT	G	26277
1247_A4	csm2Δ	MMS	IX	189249	172085	SNP	1	G	2	G/A	54.1/45.9	33/28	61	G	54.098	33	A	45.902	28	TTACAAGACAGATTGATGAC	ATGAACAAGCGTTCAAAATG	TTACAAGACAGATTGATGAC	ATGAACAAGCGTTCAAAATG	A	60740
1247_A4	csm2Δ	MMS	IX	242967	225803	SNP	1	C	2	C/A	52.2/47.8	47/43	90	C	52.222	47	A	47.778	43	TAAAATGACTTTTAAGATAC	ACGAGACCTCATAACAATAC	TAAAATGACTTTTAAGATAC	ACGAGACCTCATAACAATAC	A	53718
1247_A4	csm2Δ	MMS	IX	248840	231676	SNP	1	C	2	C/T	50.9/49.1	29/28	57	C	50.877	29	T	49.123	28	ATACTTGCTTAAATAACCTA	ATTGTTTTAGGCACTATGGC	ATACTTGCTTAAATAACCTA	ATTGTTTTAGGCACTATGGC	T	5873
1247_A4	csm2Δ	MMS	IX	253177	236013	SNP	1	T	2	A/T	53.9/46.1	41/35	76	A	53.947	41	T	46.053	35	GTGAAGGTAGAGTAGTTTGA	AGGGCATCTGCATATTAGGT	GTGAAGGTAGAGTAGTTTGA	AGGGCATCTGCATATTAGGT	A	4337
1247_A4	csm2Δ	MMS	IX	272141	254981	SNP	1	G	2	G/A	51.8/48.2	43/40	83	G	51.807	43	A	48.193	40	CATCTTGCGCACGGGTTGAA	AATTTGTTAATAAACGATGA	CATCTTGCGCACGGGTTGAA	AATTTGTTAATAAACGATGA	A	18964
1247_A4	csm2Δ	MMS	IX	308093	290929	SNP	1	G	2	G/T	50.0/50.0	32/32	64	G	50	32	T	50	32	CGTCAGAGATGAGAGTAATA	AATAAGTTCTAGGCAGGATA	CGTCAGAGATGAGAGTAATA	AATAAGTTCTAGGCAGGATA	T	35952
1247_A4	csm2Δ	MMS	IX	324317	307153	SNP	1	A	2	T/A	53.5/46.5	38/33	71	T	53.521	38	A	46.479	33	AAAAATCTCCGCGACGGGGA	TTGAACCCCGATCTGGCACG	AAAAATCTCCGCGACGGGGA	TTGAACCCCGATCTGGCACG	T	16224
1247_A4	csm2Δ	MMS	IX	341943	324779	SNP	1	A	2	T/A	54.1/45.9	40/34	74	T	54.054	40	A	45.946	34	GCAATCGTTAATTTGAGTAA	GATAACCACTCTTCCTCTTC	GCAATCGTTAATTTGAGTAA	GATAACCACTCTTCCTCTTC	T	17626
1247_A4	csm2Δ	MMS	IX	431090	413925	SNP	1	C	2	A/C	50.0/50.0	42/42	84	A	50	42	C	50	42	ACTCTCCGTCAAAACTTTTG	CGATTGCTTCTGCAATTTCG	ACTCTCCGTCAAAACTTTTG	CGATTGCTTCTGCAATTTCG	A	89147
1247_A4	csm2Δ	MMS	IX	434420	417255	SNP	1	A	2	T/A	51.9/48.1	42/39	81	T	51.852	42	A	48.148	39	AACATATATTAATATTATAA	TTCATTTGCTTTCACGAACT	AACATATATTAATATTATAA	TTCATTTGCTTTCACGAACT	T	3330
1247_A4	csm2Δ	MMS	X	38473	24523	SNP	1	G	2	G/C	52.3/47.7	46/42	88	G	52.273	46	C	47.727	42	TTGATGATGCCATCGGCACA	GAGACATAGTTATGGCTGCC	TTGATGATGCCATCGGCACA	GAGACATAGTTATGGCTGCC	C
1247_A4	csm2Δ	MMS	X	54551	40601	SNP	1	A	2	A/G	54.8/45.2	40/33	73	A	54.795	40	G	45.205	33	CATGGATCGATTGGTAATGA	ATTGCCACAGGCACCATATT	CATGGATCGATTGGTAATGA	ATTGCCACAGGCACCATATT	G	16078
1247_A4	csm2Δ	MMS	X	70670	56720	SNP	1	A	2	T/A	52.8/47.2	47/42	89	T	52.809	47	A	47.191	42	ATCATTATATCAAAGCGATA	CAAAAACTGATACTTTAGCA	ATCATTATATCAAAGCGATA	CAAAAACTGATACTTTAGCA	T	16119
1247_A4	csm2Δ	MMS	X	95594	81643	SNP	1	C	2	A/C	51.1/47.8	47/44	92	A	51.087	47	C	47.826	44	CACTACAAACAACGCCCAAG	CACTACTATTGACAGTCGTT	CACTACAAACAACGCCCAAG	CACTACTATTGACAGTCGTT	A	24924
1247_A4	csm2Δ	MMS	X	133046	119095	SNP	1	T	2	T/C	50.6/49.4	45/44	89	T	50.562	45	C	49.438	44	TGGAGGTGGCGTTTGGATCG	CCTCCAACTGTCTTGTAACA	TGGAGGTGGCGTTTGGATCG	CCTCCAACTGTCTTGTAACA	C	37452
1247_A4	csm2Δ	MMS	X	153888	139937	SNP	1	G	2	A/G	51.4/48.6	18/17	35	A	51.429	18	G	48.571	17	TCTTCGACCTTTCTTCTGGT	TTACAGAAGATGACAGCTTG	TCTTCGACCTTTCTTCTGGT	TTACAGAAGATGACAGCTTG	A	20842
1247_A4	csm2Δ	MMS	X	167741	153790	SNP	1	T	2	T/A	50.8/45.8	30/27	59	T	50.847	30	A	45.763	27	GGGCATCAATTGACAGTATG	TAAAACCGGATTCCAAAAAT	GGGCATCAATTGACAGTATG	AAAACCGGATTCCAAAAATA	A	13853
1247_A4	csm2Δ	MMS	X	173538	159587	SNP	1	G	2	C/G	50.9/49.1	29/28	57	C	50.877	29	G	49.123	28	AAAAAAAAAATCCTTTTAAT	CTTAATTACCTTCTTAAATA	AAAAAAAAAATCCTTTTAAT	CTTAATTACCTTCTTAAATA	C	5797
1247_A4	csm2Δ	MMS	X	182798	168847	SNP	1	G	2	G/T	53.1/46.9	26/23	49	G	53.061	26	T	46.939	23	GGCTTCAGCTGTTGTTGCGG	ACTATTCGTGGCGTTCTGGA	GGCTTCAGCTGTTGTTGCGG	ACTATTCGTGGCGTTCTGGA	T	9260
1247_A4	csm2Δ	MMS	X	238328	224377	SNP	1	A	2	A/T	53.9/46.1	41/35	76	A	53.947	41	T	46.053	35	TTTCGACGGAATCTGAAGAA	ATTCGAAATTTGAATGGACA	TTTCGACGGAATCTGAAGAA	ATTCGAAATTTGAATGGACA	T	55530
1247_A4	csm2Δ	MMS	X	302607	288657	SNP	1	C	2	G/C	50.7/49.3	35/34	69	G	50.725	35	C	49.275	34	GAATGATCTGGATCGTGGAA	ACAATTTCTACCGAGGCACT	GAATGATCTGGATCGTGGAA	ACAATTTCTACCGAGGCACT	G	64279
1247_A4	csm2Δ	MMS	X	312159	298209	SNP	1	T	2	A/T	50.6/49.4	45/44	89	A	50.562	45	T	49.438	44	CTTCGTCATCTAATTCAGAA	CAGATTCATCGTCCACCCAT	CTTCGTCATCTAATTCAGAA	CAGATTCATCGTCCACCCAT	A	9552
1247_A4	csm2Δ	MMS	X	329985	316035	SNP	1	T	2	A/T	52.1/47.9	25/23	48	A	52.083	25	T	47.917	23	AAGATGCAGTCTGGTCTTCA	TTAGTTCAGAGTCATTATTA	AAGATGCAGTCTGGTCTTCA	TTAGTTCAGAGTCATTATTA	A	17826
1247_A4	csm2Δ	MMS	X	338234	324284	SNP	1	A	2	T/A	51.7/48.3	30/28	58	T	51.724	30	A	48.276	28	ATATTTCACCAACACACACA	AAAACAGTACTTCACTAAAT	ATATTTCACCAACACACACA	AAAACAGTACTTCACTAAAT	T	8249
1247_A4	csm2Δ	MMS	X	338550	324600	SNP	1	G	2	A/G	53.1/46.9	34/30	64	A	53.125	34	G	46.875	30	CTCTAAAGATCGATGTCGCT	TTGACTCCACTGGTGTTTTC	CTCTAAAGATCGATGTCGCT	TTGACTCCACTGGTGTTTTC	A	316
1247_A4	csm2Δ	MMS	X	422545	408165	SNP	1	A	2	T/A	50.7/49.3	38/37	75	T	50.667	38	A	49.333	37	CTACTGTCTGAACAACTCGT	TAAATTAATGTATGATATGA	CTACTGTCTGAACAACTCGT	TAAATTAATGTATGATATGA	T	83995
1247_A4	csm2Δ	MMS	X	459771	445391	SNP	1	T	2	T/G	54.3/45.7	38/32	70	T	54.286	38	G	45.714	32	AAATATATAAATGCATTTTT	TACATACCTGTTGGGTGAAT	AAATATATAAATGCATTTTT	TACATACCTGTTGGGTGAAT	G	37226
1247_A4	csm2Δ	MMS	X	601283	581251	SNP	1	A	2	T/A	52.4/47.6	44/40	84	T	52.381	44	A	47.619	40	TCATGACTCCACATCTTTCA	TCATGGGCCGGATGATTCAT	TCATGACTCCACATCTTTCA	TCATGGGCCGGATGATTCAT	T	141512
1247_A4	csm2Δ	MMS	X	604693	584661	SNP	1	T	2	T/A	50.7/49.3	38/37	75	T	50.667	38	A	49.333	37	TTGACAGTTTGGAGTTCAAC	TTTTTAGGAATTCTAACTCT	TTGACAGTTTGGAGTTCAAC	TTTTTAGGAATTCTAACTCT	A	3410
1247_A4	csm2Δ	MMS	X	606410	586378	SNP	1	G	2	A/G	54.2/45.8	39/33	72	A	54.167	39	G	45.833	33	TCATCAAGATTGGGCTAAGC	CCTTTGATCCTTTCCCTCGA	TCATCAAGATTGGGCTAAGC	CCTTTGATCCTTTCCCTCGA	A	1717
1247_A4	csm2Δ	MMS	X	607903	587871	SNP	1	G	2	A/G	52.2/47.8	36/33	69	A	52.174	36	G	47.826	33	ATGGTATTGTAAGGATGATA	TGCATTCTATGAGTGATTTT	ATGGTATTGTAAGGATGATA	TGCATTCTATGAGTGATTTT	A	1493
1247_A4	csm2Δ	MMS	X	617999	597967	SNP	1	G	2	G/A	53.2/46.8	25/22	47	G	53.191	25	A	46.809	22	TGATATCTTCGGATGCAAGG	TTCGAATCCCTTAGCTCTCA	TGATATCTTCGGATGCAAGG	TTCGAATCCCTTAGCTCTCA	A	10096
1247_A4	csm2Δ	MMS	X	652184	632153	SNP	1	A	2	A/T	52.8/47.2	38/34	72	A	52.778	38	T	47.222	34	AATCATTGAAAGATTGACCA	CTCCTTGATGATGAACGGTA	AATCATTGAAAGATTGACCA	CTCCTTGATGATGAACGGTA	T	34185
1247_A4	csm2Δ	MMS	X	685492	665457	SNP	1	C	2	A/C	50.8/49.2	32/31	63	A	50.794	32	C	49.206	31	GATGGTTAATTCATTTTTCC	GAAGATCTTCAAAAAATGGA	GATGGTTAATTCATTTTTCC	GAAGATCTTCAAAAAATGGA	A	33308
1247_A4	csm2Δ	MMS	XI	12007	12008	SNP	1	G	2	G/T	53.6/46.4	52/45	97	G	53.608	52	T	46.392	45	ACTTATTTAAAACCAAAAAT	GAAGTATTCATACATCCCCC	ACTTATTTAAAACCAAAAAT	GAAGTATTCATACATCCCCC	T
1247_A4	csm2Δ	MMS	XI	51337	51340	SNP	1	G	2	A/G	54.5/45.5	48/40	88	A	54.545	48	G	45.455	40	ATTTGCTTTAAAAGAATGAA	TTTTCAGACGACGAGGTCAC	ATTTGCTTTAAAAGAATGAA	TTTTCAGACGACGAGGTCAC	A	39330
1247_A4	csm2Δ	MMS	XI	63695	63698	SNP	1	T	2	C/T	51.4/48.6	38/36	74	C	51.351	38	T	48.649	36	TAACTTAAAGAAAAGAGTTG	AGTAAGCTAATAGCATTAAG	TAACTTAAAGAAAAGAGTTG	AGTAAGCTAATAGCATTAAG	C	12358
1247_A4	csm2Δ	MMS	XI	63875	63878	SNP	1	G	2	T/G	53.6/46.4	45/39	84	T	53.571	45	G	46.429	39	ATATAATACAAATGCATAGA	GAAAGGCTATAGAAATGAAG	ATATAATACAAATGCATAGA	GAAAGGCTATAGAAATGAAG	T	180
1247_A4	csm2Δ	MMS	XI	111506	111514	SNP	1	C	2	C/A	54.8/45.2	40/33	73	C	54.795	40	A	45.205	33	AATAATTGTTTAGTTTTCTT	TAACAGTTTCTAGCTCCGAC	AATAATTGTTTAGTTTTCTT	TAACAGTTTCTAGCTCCGAC	A	47631
1247_A4	csm2Δ	MMS	XI	132041	132049	SNP	1	A	2	C/A	52.5/47.5	32/29	61	C	52.459	32	A	47.541	29	GAATGCCCAATAATAAACTC	GAGGTGATCTTTGTACAGAA	GAATGCGCAATAATAAACTC	GAGGTGATCTTTGTACAGAA	C	20535
1247_A4	csm2Δ	MMS	XI	138674	138679	SNP	1	C	2	C/A	50.7/49.3	38/37	75	C	50.667	38	A	49.333	37	GCTGTAAAGAGATAACTGAA	GATGAGTAACCGCCAACATG	GCTGTAAAGAGATAACTGAA	GATGAGTAACCGCCAACATG	A	6633
1247_A4	csm2Δ	MMS	XI	141155	141160	SNP	1	T	2	T/A	53.7/46.3	36/31	67	T	53.731	36	A	46.269	31	ATATTAAAGAACTCTTTTCA	TTACATGGATAATTGGTGAA	ATATTAAAGAACTCTTTTCA	TTACATGAATAATTGGTGAA	A	2481
1247_A4	csm2Δ	MMS	XI	161208	161216	SNP	1	C	2	C/G	50.7/49.3	35/34	69	C	50.725	35	G	49.275	34	CTAGCGGTTTCATCTCTGTA	GACGGAAGAACATTGATTCC	CTAGCGGTTTCATCTCTGTA	GACGGAAGAACATTGATTCC	G	20053
1247_A4	csm2Δ	MMS	XI	162534	162542	SNP	1	C	2	T/C	50.7/49.3	34/33	67	T	50.746	34	C	49.254	33	TCTTCTGATTAGAAGTCAGA	GCGTTGCCATTACGCCACGC	TCTTCTGATTAGAAGTCAGA	GCGTTGCCATTACGCCACGC	T	1326
1247_A4	csm2Δ	MMS	XI	164243	164251	SNP	1	A	2	G/A	53.2/46.8	33/29	62	G	53.226	33	A	46.774	29	TGTACAAGACGTCTGGGTAG	CCTTCTTTTCCTTCAACAAT	TGTACAAGACGTCTGGGTAG	CCTTCTTTTCCTTCAACAAT	G	1709
1247_A4	csm2Δ	MMS	XI	191245	191253	SNP	1	T	2	A/T	54.7/45.3	35/29	64	A	54.688	35	T	45.312	29	TTTTTTTTAAAAAGATATTG	GAGATCTTGCTATTATTAGC	TTTTTTTTAAAAAGATATTG	GAGATCTTGCTCTTATTAGC	A	27002
1247_A4	csm2Δ	MMS	XI	192379	192387	SNP	1	T	2	C/T	53.6/46.4	45/39	84	C	53.571	45	T	46.429	39	TCTTCCAGTCAAGCTGTTGG	TGTTTAAAAGTTCTGATTTG	TCTTCCAGTCAAGCTGTTGG	TGTTTAAAAGTTCTGATTTG	C	1134
1247_A4	csm2Δ	MMS	XI	203019	203027	SNP	1	A	2	C/A	53.2/46.8	33/29	62	C	53.226	33	A	46.774	29	GCCTTGTTGGCGCAATCGGT	GCGCGTATGACTCTTAATCA	GCCTTGTTGGCGCAATCGGT	GCGCGTATGACTCTTAATCA	C	10640
1247_A4	csm2Δ	MMS	XI	220213	220221	SNP	1	A	2	A/T	50.8/49.2	31/30	61	A	50.82	31	T	49.18	30	GCGGCAAGAATTAGCATGGA	AAAAGCATAAAAAGACGAAA	GCGGCAAGAATTAGCATGGA	AAAAGCATAAAAAGACGAAA	T	17194
1247_A4	csm2Δ	MMS	XI	318113	318121	SNP	1	G	2	G/A	52.1/47.9	37/34	71	G	52.113	37	A	47.887	34	GGGGCCTCAAAGTGTATCAA	CACAGTTCAACCACAGCCAA	GGGGCCTCAAAGTGTATCAA	CACAGTTCAACCACAGCCAA	A	97900
1247_A4	csm2Δ	MMS	XI	318441	318449	SNP	1	A	2	G/A	53.7/46.3	29/25	54	G	53.704	29	A	46.296	25	TCTGATGATAGTAGCAACAA	AATTCCAAATCCACATCCAG	TCTGATGATAGTAGCAACAA	AATTCCAAATCCACATCCAG	G	328
1247_A4	csm2Δ	MMS	XI	424849	424857	SNP	1	C	2	C/A	51.7/48.3	31/29	60	C	51.667	31	A	48.333	29	CTTCAGCGTTGGAAGTACTT	AACAATGGTCTTAAAGTCAT	TTTCAGCGTTGGAAGTACTT	AACAATGGTCTTAAAGTCAT	A	106408
1247_A4	csm2Δ	MMS	XI	487572	487570	SNP	1	G	2	A/G	53.8/46.3	43/37	80	A	53.75	43	G	46.25	37	TTTTTAATCCATATTGTTAG	GCAACATTCAATTTTAAACT	TTTTTAATCCATATTGTTAG	GCAACATTCAATTTTAAACT	A	62723
1247_A4	csm2Δ	MMS	XI	542754	542525	SNP	1	A	2	T/A	54.8/45.2	34/28	62	T	54.839	34	A	45.161	28	ACTTTCGCCCATAGTAGTCG	GCTTCTTCCTTAGTGGAACA	ACTTTCGCCCATAGTAGTCG	GCTTCTTCCTTAGTGGAACA	T	55182
1247_A4	csm2Δ	MMS	XI	568360	568132	SNP	1	A	2	A/G	50.0/50.0	40/40	80	A	50	40	G	50	40	CTTGAAGCCAGTGGATGAGA	TCTTGAGATTTACGCTCCGG	CTTGAAGTCAGTGGATGAGA	TCTTGAGATTTACGCTCCGG	G	25606
1247_A4	csm2Δ	MMS	XI	581265	581032	SNP	1	C	2	C/A	53.2/46.8	42/37	79	C	53.165	42	A	46.835	37	GTTGAAAGTTGCCGGAAAAA	CCCAAAAAGCATAAAAAAAA	GTTGAAAGTTGCCGGAAAAA	CCCAAAAAGCAT-AAAAAAA	A	12905
1247_A4	csm2Δ	MMS	XI	633853	633590	SNP	1	C	2	T/C	52.1/47.9	49/45	94	T	52.128	49	C	47.872	45	ATCAATTGGAGATAAACCAT	AGTAATAACATTTCTCTCGT	ATCAATTGGAGATAAACCAT	AGTAATAACATTTCTCTCGT	T	52588
1247_A4	csm2Δ	MMS	XII	56054	48798	SNP	1	T	2	T/C	52.6/47.4	41/37	78	T	52.564	41	C	47.436	37	CTAAGGCCTGCATATCGTCG	CAGCAACAACATGTAATCCA	CTAAGGCCTGCATATCGTCG	CAGCAACAACATGTAATCCA	C
1247_A4	csm2Δ	MMS	XII	69264	62008	SNP	1	T	2	A/T	51.1/48.9	24/23	47	A	51.064	24	T	48.936	23	GGTCAACTCCGTTAGAGAAG	TATATTTGAGTCACAAGAAC	GGTCAACTCCGTTAGAGAAG	TATATTTGAGTCACAAGAAC	A	13210
1247_A4	csm2Δ	MMS	XII	152231	144961	SNP	1	T	2	A/T	52.0/48.0	39/36	75	A	52	39	T	48	36	ATCGGAACTCTCCTCAATAA	AATACTTTCCTTTATAGTAC	ATCGGAACTCTCCTCAATAA	AATACTTTCCTTTATAGTAC	A	82967
1247_A4	csm2Δ	MMS	XII	160443	153173	SNP	1	G	2	T/G	52.1/47.9	38/35	73	T	52.055	38	G	47.945	35	TTTAATATTAACACTAGATT	TAGTGAAGCTATGTTGGAAA	TTTAATATTAACCCTAGATT	TAGTGAAGCTATGTTGGAAA	T	8212
1247_A4	csm2Δ	MMS	XII	288630	277540	SNP	1	A	2	G/A	53.8/46.2	42/36	78	G	53.846	42	A	46.154	36	AGACAAGGAAAGTTAAATTT	TGGGCAGCAGCCCATTTAGG	AGACAAGGAAAGTTAAATTT	TGGGCAGCAGCCCATTTAGG	G	128187
1247_A4	csm2Δ	MMS	XII	292557	281469	SNP	1	T	2	T/A	52.5/47.5	31/28	59	T	52.542	31	A	47.458	28	CGATTACATATTGTCTCAGT	CTGGTTCATCAATGGCTGAT	CGATTACATATTGTCTCAGT	CTGGTTCATCAATGGCTGAT	A	3927
1247_A4	csm2Δ	MMS	XII	348666	337580	SNP	1	C	2	G/C	52.5/47.5	21/19	40	G	52.5	21	C	47.5	19	TGTTTTAACTTCCTATAGAA	TGAATGGGAAACTTGCATCT	TGTTTTAACTTCCTATAGAA	TGAATGGGAAACTTGCATCT	G	56109
1247_A4	csm2Δ	MMS	XII	514555	468241	SNP	1	G	2	T/G	52.4/47.6	33/30	63	T	52.381	33	G	47.619	30	GTGAACTTGATGGTAGGAGC	GCTTGCGTAGCTTCCATTGG	GTGAACTTGATGGTAGGAGC	GCTTGCGTAGCTTCCATTGG	T	165889
1247_A4	csm2Δ	MMS	XIII	41037	36379	SNP	1	G	2	C/G	50.0/50.0	54/54	108	C	50	54	G	50	54	CTTGAAAAATCTGAGACAAC	TGCCATTTTGTAAGTGCCTA	CTTGAAAAATCTGAGACAAC	TGCCATTTTGTAAGTGCCTA	C
1247_A4	csm2Δ	MMS	XIII	78288	73626	SNP	1	T	2	A/T	51.2/48.8	42/40	82	A	51.22	42	T	48.78	40	TACTATTATATTTTTACAAA	ACATATTGCTAGGCTACTCT	TACTATTATATTTTTACAAA	ACATATTGCTAGGCTACTCT	A	37251
1247_A4	csm2Δ	MMS	XIII	102540	97880	SNP	1	C	2	C/T	52.2/47.8	36/33	69	C	52.174	36	T	47.826	33	ACCATTTCTTAGCAGGTAAC	AAGATGAACAGGACTTCCAG	ACCATTTCTTAGCAGGTAAC	AAGATGAACAGGACTTCCAG	T	24252
1247_A4	csm2Δ	MMS	XIII	183981	179321	SNP	1	T	2	A/T	51.4/48.6	37/35	72	A	51.389	37	T	48.611	35	ACTTGCGCGATCTTTATTGG	ATTTGTTGGAACATAGAGTT	ACTTGCGCGATCTTTATTGG	ATTTGTTGGAACATAGAGTT	A	81441
1247_A4	csm2Δ	MMS	XIII	214736	200780	SNP	1	G	2	G/T	50.8/49.2	32/31	63	G	50.794	32	T	49.206	31	ACAAGACTACGTATTAGAGC	TGTCAAGAGGATTATGGAGA	ACAAGACTACGTATTAGAGC	TGTCAAGAGGATTATGGAGA	T	30755
1247_A4	csm2Δ	MMS	XIII	217504	203548	SNP	1	A	2	C/A	51.9/48.1	28/26	54	C	51.852	28	A	48.148	26	ATATATCCATTATCAAATAT	CAAGCAATTAAGAGCTATCT	ATATATCCATTATCAAATAT	CAAGCAATTAAGAGCTATCT	C	2768
1247_A4	csm2Δ	MMS	XIII	223209	209253	SNP	1	C	2	C/T	51.2/48.8	42/40	82	C	51.22	42	T	48.78	40	TTGTAATGAGTTGGGTTTTG	ATGATTTGGACAATTCTTTC	TTGTAATGAGTTGGGTTTTG	ATGATTTGGACAATTCTTTC	T	5705
1247_A4	csm2Δ	MMS	XIII	270500	256543	SNP	1	C	2	A/C	53.1/46.9	34/30	64	A	53.125	34	C	46.875	30	CTTTAAGTTATAGTTTGAAT	GAAGAAGATGTTACCAAGTT	CTTTAAGTTATAGTTTGAAT	GAAGAAGATGTTACCAAGTT	A	47291
1247_A4	csm2Δ	MMS	XIII	273083	259126	SNP	1	G	2	C/G	53.4/46.6	31/27	58	C	53.448	31	G	46.552	27	TCAAAAAGACACCTAGTGCA	CTGAACCGGCAAAGTAAAGC	TCAAAAAGACACCTAGTGCA	CTGAACCGGCAAAGTAAAGC	C	2583
1247_A4	csm2Δ	MMS	XIII	354546	340587	SNP	1	C	2	C/T	54.3/45.7	44/37	81	C	54.321	44	T	45.679	37	ATCCGCAACAATCGCAGCCA	AGCAACAGCAACAACAACAA	ATCCGCAACAATCGCAGCCA	AGCAACAGCAACAACAACAA	T	81463
1247_A4	csm2Δ	MMS	XIII	382197	364499	SNP	1	T	2	T/A	53.6/46.4	37/32	69	T	53.623	37	A	46.377	32	GGGCATAACAGATTTGCCGA	CTTCCACCACAATGCAGGTT	GGGCATAACAGATTTGCCGA	CTTCCACCACAATGCAGGTT	A	27651
1247_A4	csm2Δ	MMS	XIII	394638	376940	SNP	1	C	2	T/C	51.5/48.5	34/32	66	T	51.515	34	C	48.485	32	AATAAGAAATTCAAAAGAGA	TCAGAGCTTCCAACAGAGGT	AATAAGAAATTCAAAAGAGA	TCAGAGCTTCCAACAGAGGT	T	12441
1247_A4	csm2Δ	MMS	XIII	477818	460121	SNP	1	C	2	C/A	52.4/47.6	44/40	84	C	52.381	44	A	47.619	40	ATTTCTTTTACACTTTTCAA	CCCTGTTTGTTCCTGGAACT	ATTTCTTTTACACTTTTCAA	CCCTGTTTGTTCCTGGAACT	A	83180	Complex
1247_A4	csm2Δ	MMS	XIII	477821	460124	SNP	1	C	2	C/T	50.0/50.0	44/44	88	C	50	44	T	50	44	TCTTTTACACTTTTCAACCC	TGTTTGTTCCTGGAACTGCA	TCTTTTACACTTTTCAACCC	TGTTTGTTCCTGGAACTGCA	T	3	Complex
1247_A4	csm2Δ	MMS	XIII	487289	469592	SNP	1	A	2	C/A	53.1/46.9	34/30	64	C	53.125	34	A	46.875	30	ATATATTCTATCAGTTCACG	AAGGTGCTTCCGATGCTTAT	ATATATTCTATCAGTTCACG	AAGGTGCTTCCGATGCTTAT	C	9468
1247_A4	csm2Δ	MMS	XIII	518925	501229	SNP	1	C	2	C/T	50.0/50.0	33/33	66	C	50	33	T	50	33	ACTTATGCTGGTCAATTATT	AACGATATCATTATTGATCT	ACTTATGCTGGTCAATTATT	AACGATATCATTATTGATCT	T	31636
1247_A4	csm2Δ	MMS	XIII	527334	509638	SNP	1	G	2	A/G	53.6/46.4	37/32	69	A	53.623	37	G	46.377	32	ACGGAACGGTATTGTTATGT	GTTCCTAGATTTGGATCCAC	ACGGAACGGTATTGTTATGT	GTTCCTAGATTTGGATCCAC	A	8409
1247_A4	csm2Δ	MMS	XIII	532780	515084	SNP	1	A	2	A/G	50.0/50.0	31/31	62	A	50	31	G	50	31	CATCGGAGATGAATTAAAGA	CGATCTCGAAGGGGCAGAAG	CATCGGAGATGAATTAAAGA	CGATCTCGAAGGGGCAGAAG	G	5446
1247_A4	csm2Δ	MMS	XIII	572904	555199	SNP	1	T	2	A/T	50.8/49.2	32/31	63	A	50.794	32	T	49.206	31	GCTCCAGGGGAGGTTCGAAC	CTCGACCTTCAGATTATGAG	GCTCCAGGGTAGGTTCGAAC	CTCGACCTTCAGATTATGAG	A	40124
1247_A4	csm2Δ	MMS	XIII	572945	555240	SNP	1	G	2	G/C	51.3/48.7	39/37	76	G	51.316	39	C	48.684	37	ACTGACGCTCTTCCTACTGA	CTACTGAAGCTGTCTGTTAT	ACTGACGCTCTTCCTACTGA	CTACTGAAGCTATCTGTTAT	C	41
1247_A4	csm2Δ	MMS	XIII	595349	577643	SNP	1	A	2	A/G	50.0/50.0	32/32	64	A	50	32	G	50	32	AGTTGAAGACCTTTTTTTCA	TATTCCTTCTAGATTAAGGG	AGTTGAAGACCTTTTTTTCA	TATTCCTTCTAGATTAAGGG	G	22404
1247_A4	csm2Δ	MMS	XIII	620129	602423	SNP	1	A	2	A/T	50.0/50.0	36/36	72	A	50	36	T	50	36	TTATAACTTGTATTATCGTG	CATATGTGAAGTGGATGAGC	TTATAACTTGTATTATCGTG	CATATGTGAAGTGGATGAGC	T	24780
1247_A4	csm2Δ	MMS	XIII	673131	655425	SNP	1	G	2	G/A	50.7/49.3	34/33	67	G	50.746	34	A	49.254	33	TCTCTTGAAATCCTTAGCTT	AATGGCTTCTGCAACTGCTT	TCTCTTGAAATCCTTAGCTT	AATGGCTTCTGCAACTGCTT	A	53002
1247_A4	csm2Δ	MMS	XIII	674313	656607	SNP	1	T	2	C/T	50.8/49.2	32/31	63	C	50.794	32	T	49.206	31	TTCTGGTGCTGGTGGTGGAG	TGGCTTGGTTGAAACTGCGT	TTCTGGTGCTGGTGGTGGAG	TGGCTTGGTTGAAACTGCGT	C	1182
1247_A4	csm2Δ	MMS	XIII	685775	668067	SNP	1	A	2	A/C	52.8/47.2	38/34	72	A	52.778	38	C	47.222	34	ATCTATTATTGCCAGGAAAC	CGAATTTACCATGGACTTCA	ATCTATTATTGCCAGGAAAC	CGAATTTACCATGGACTTCA	C	11462
1247_A4	csm2Δ	MMS	XIII	696937	679230	SNP	1	T	2	A/T	52.5/47.5	42/38	80	A	52.5	42	T	47.5	38	GCGAATCCGATAACGAAGTT	TTTTTGTGAAAGGTGTCGAT	GCGAATCCGATAACGAAGTT	TTTTTGTGAAAGGTGTCGAT	A	11162
1247_A4	csm2Δ	MMS	XIII	734549	716842	SNP	1	T	2	A/T	50.0/50.0	35/35	70	A	50	35	T	50	35	CAGAGCGGTAAAAACATCAC	TATCTGCTAACTTCTGAAGG	CAGAGCGGTAAAAACATCAC	TATCTGCTAACTTCTGAAGG	A	37612
1247_A4	csm2Δ	MMS	XIII	747940	730233	SNP	1	G	2	A/G	53.4/46.6	39/34	73	A	53.425	39	G	46.575	34	CTTCTGATTAGAAGTCAGAC	CGTTGCCATTACGCCACGCG	CTTCTGATTAGAAGTCAGAC	CGTTGCCATTACGCCACGCG	A	13391
1247_A4	csm2Δ	MMS	XIII	750648	732941	SNP	1	T	2	A/T	52.9/47.1	37/33	70	A	52.857	37	T	47.143	33	TATTTGTCTTCTTGATAATG	CAGGAAGTTCAAAAGGTCTT	TATTTGTCTTCTTGATAATG	CAGGAAGTTCAAAAGGTCTT	A	2708
1247_A4	csm2Δ	MMS	XIII	753618	735911	SNP	1	C	2	C/G	50.7/49.3	36/35	71	C	50.704	36	G	49.296	35	TGCAACTTTTGCAAGAAATA	CAGTAACGAGACTTGGCAAT	TGCAACTTTTGCAAGAAATA	CAGTAACGAGACTTGGCAAT	G	2970
1247_A4	csm2Δ	MMS	XIII	768398	750691	SNP	1	T	2	T/A	51.4/48.6	36/34	70	T	51.429	36	A	48.571	34	CCGGAATCGAACCGGAGACC	CTCCCATGCTAAGGGAGCGC	CCGGAATCGAACCGGAGACC	CTCCCATGCTAAGGGAGCGC	A	14780
1247_A4	csm2Δ	MMS	XIII	801927	784218	SNP	1	A	2	A/T	52.8/47.2	47/42	89	A	52.809	47	T	47.191	42	GGGTTTAAGAAATACTTGAC	TTATTAAATGGAGAGGTTGG	GGGTTTAAGAAATACTTGAC	TTATTAAATGGAGAGGTTGG	T	33529
1247_A4	csm2Δ	MMS	XIII	807321	789612	SNP	1	T	2	T/C	51.6/48.4	33/31	64	T	51.562	33	C	48.438	31	GGGATCCCTTTGTAAGCAGG	CCGAAAATAACATCGAATTT	GGGATCCCTTTGTAAGCAGG	CCGAAAATAACATCGAATTT	C	5394
1247_A4	csm2Δ	MMS	XIII	812618	794909	SNP	1	C	2	C/T	50.6/49.4	40/39	79	C	50.633	40	T	49.367	39	TACCTCTTCGGCTTCTTTCT	TATTCCCATTTCTTGTTCCC	TACCTCTTCGGCTTCTTTCT	TATTCCCATTTCTTGTTCCC	T	5297
1247_A4	csm2Δ	MMS	XIII	897925	880213	SNP	1	T	2	T/A	54.7/45.3	52/43	95	T	54.737	52	A	45.263	43	TTCTGCTATTGATTTGGTAG	GTTCGGGTTAATTCATTTTT	TTCTGCTATTGATTTGGTAG	GCTCGGGTTAATTCATTTTT	A	85307
1247_A4	csm2Δ	MMS	XIV	35047	29384	SNP	1	A	2	A/T	51.5/48.5	51/48	99	A	51.515	51	T	48.485	48	TGCCAGACTTAAATACAGCT	CTCCCAGCTCTCCGAAACGA	TGCCAGACTTAAATACAGCT	CTCCCAGCTCTCCGAAACGA	T
1247_A4	csm2Δ	MMS	XIV	63791	58131	SNP	1	T	2	A/T	51.4/48.6	37/35	72	A	51.389	37	T	48.611	35	TTCACCGCCAGCCTTAACGA	CTTGGCTCTGGCACCAGCAG	TTCACCGCCAGCCTTAACGA	CTTGGCTCTGGCACCAGCAG	A	28744
1247_A4	csm2Δ	MMS	XIV	64143	58483	SNP	1	A	2	G/A	50.5/49.5	51/50	101	G	50.495	51	A	49.505	50	TGAAGCCAAAAAGAGTGCAA	ACGAAAAAGTACCAATTTGT	TGAAGCCAAAAAGAGTGCAA	ACGAAAAAGTACCAATTTGT	G	352
[truncated: 9,169 more rows]

## Sheet: 1d
Supplemental File 1d: Primers Used For CAN1 sequencing
Primer Name	Sequence	Use
CAN_R1	TCATATGTAGTACTCTGGGTGAGAATGCGAAATGGC	PacBio sequencing of CAN1
CAN_R2	GCGATCTATGCACACGGGGTGAGAATGCGAAATGGC	PacBio sequencing of CAN1
CAN_R3	TGCAGTCGAGATACATGGGTGAGAATGCGAAATGGC	PacBio sequencing of CAN1
CAN_R4	GACTCTGCGTCGAGTCGGGTGAGAATGCGAAATGGC	PacBio sequencing of CAN1
CAN_R5	TACAGCGACGTCATCGGGGTGAGAATGCGAAATGGC	PacBio sequencing of CAN1
CAN_R6	GCGCAGACTACGTGTGGGGTGAGAATGCGAAATGGC	PacBio sequencing of CAN1
CAN_R7	GTCTCTGCGATACAGCGGGTGAGAATGCGAAATGGC	PacBio sequencing of CAN1
CAN_R8	AGTATGAGATAGCTCGGGGTGAGAATGCGAAATGGC	PacBio sequencing of CAN1
CAN_R9	GCGACGAGTACTCATGGGGTGAGAATGCGAAATGGC	PacBio sequencing of CAN1
CAN_R10	AGTATCACAGTCGCTGGGGTGAGAATGCGAAATGGC	PacBio sequencing of CAN1
CAN_R11	ATCATATGATGCGACAGGGTGAGAATGCGAAATGGC	PacBio sequencing of CAN1
CAN_R12	AGACGTAGATCACAGCGGGTGAGAATGCGAAATGGC	PacBio sequencing of CAN1
CAN_R13	CGTGTCATGCTACTCAGGGTGAGAATGCGAAATGGC	PacBio sequencing of CAN1
CAN_R14	TGTGAGACTGCATGTCGGGTGAGAATGCGAAATGGC	PacBio sequencing of CAN1
CAN_R15	GCTCAGTGCGCTACTGGGGTGAGAATGCGAAATGGC	PacBio sequencing of CAN1
CAN_R16	ACTATCGCGCACGCAGGGGTGAGAATGCGAAATGGC	PacBio sequencing of CAN1
CAN_R25	TCAGCTGACGATGTGAGGGTGAGAATGCGAAATGGC	PacBio sequencing of CAN1
CAN_R26	ACTGATGCGCACATGTGGGTGAGAATGCGAAATGGC	PacBio sequencing of CAN1
CAN_R27	CTACTCTCAGCAGTGAGGGTGAGAATGCGAAATGGC	PacBio sequencing of CAN1
CAN_R28	ATCTACATCACGACTCGGGTGAGAATGCGAAATGGC	PacBio sequencing of CAN1
CAN_R29	ATATAGTACAGCGTCTGGGTGAGAATGCGAAATGGC	PacBio sequencing of CAN1
CAN_R30	GACACGACTAGATCGCGGGTGAGAATGCGAAATGGC	PacBio sequencing of CAN1
CAN_R31	TACGAGTCTGTCATACGGGTGAGAATGCGAAATGGC	PacBio sequencing of CAN1
CAN_R32	ACTCAGCTACATAGTGGGGTGAGAATGCGAAATGGC	PacBio sequencing of CAN1
CAN_R33	ACGTATCATAGTGAGAGGGTGAGAATGCGAAATGGC	PacBio sequencing of CAN1
CAN_R34	GAGTCGTATCGCTCATGGGTGAGAATGCGAAATGGC	PacBio sequencing of CAN1
CAN_R35	GCGATCACGAGTAGACGGGTGAGAATGCGAAATGGC	PacBio sequencing of CAN1
CAN_R36	CTAGACGTACATGTCGGGGTGAGAATGCGAAATGGC	PacBio sequencing of CAN1
CAN_R37	TAGCAGTCACTGTGCGGGGTGAGAATGCGAAATGGC	PacBio sequencing of CAN1
CAN_R38	CGTCATGCGATAGCTAGGGTGAGAATGCGAAATGGC	PacBio sequencing of CAN1
CAN_R39	GCGCAGTCGTCTGTATGGGTGAGAATGCGAAATGGC	PacBio sequencing of CAN1
CAN_R40	ATGAGCTACGTACAGAGGGTGAGAATGCGAAATGGC	PacBio sequencing of CAN1
CAN_R41	GTCGCGAGTCTATCAGGGGTGAGAATGCGAAATGGC	PacBio sequencing of CAN1
CAN_R42	ACATCGATCTGCACTAGGGTGAGAATGCGAAATGGC	PacBio sequencing of CAN1
CAN_R43	AGTATAGCATAGACGCGGGTGAGAATGCGAAATGGC	PacBio sequencing of CAN1
CAN_R44	GTGAGAGCGTGACTCTGGGTGAGAATGCGAAATGGC	PacBio sequencing of CAN1
CAN_R45	TGTCAGTAGATGACTCGGGTGAGAATGCGAAATGGC	PacBio sequencing of CAN1
CAN_R46	TCGTACGAGATCGACAGGGTGAGAATGCGAAATGGC	PacBio sequencing of CAN1
CAN_R47	CTACATGTGACTCGAGGGGTGAGAATGCGAAATGGC	PacBio sequencing of CAN1
CAN_R48	GCGCTATAGTGCTCGTGGGTGAGAATGCGAAATGGC	PacBio sequencing of CAN1
CAN_F1	GCGCTCTGTGTGCAGCTGGATCCAGTTTTCAATCTGTCG	PacBio sequencing of CAN1
CAN_F2	TCATGAGTCGACACTATGGATCCAGTTTTCAATCTGTCG	PacBio sequencing of CAN1
CAN_F3	TATCTATCGTATACGCTGGATCCAGTTTTCAATCTGTCG	PacBio sequencing of CAN1
CAN_F4	ATCACACTGCATCTGATGGATCCAGTTTTCAATCTGTCG	PacBio sequencing of CAN1
CAN_F5	ACGTACGCTCGTCATATGGATCCAGTTTTCAATCTGTCG	PacBio sequencing of CAN1
CAN_F6	TGTGAGTCAGTACGCGTGGATCCAGTTTTCAATCTGTCG	PacBio sequencing of CAN1
CAN_F7	AGAGACACGATACTCATGGATCCAGTTTTCAATCTGTCG	PacBio sequencing of CAN1
CAN_F8	CTGCTAGAGTCTACAGTGGATCCAGTTTTCAATCTGTCG	PacBio sequencing of CAN1
CAN_F9	AGCACTCGCGTCAGTGTGGATCCAGTTTTCAATCTGTCG	PacBio sequencing of CAN1
CAN_F10	TCATGCACGTCTCGCTTGGATCCAGTTTTCAATCTGTCG	PacBio sequencing of CAN1
CAN_F11	AGAGCATCTCTGTACTTGGATCCAGTTTTCAATCTGTCG	PacBio sequencing of CAN1
CAN_F12	CGCATCGACTACGCTATGGATCCAGTTTTCAATCTGTCG	PacBio sequencing of CAN1
CAN_F13	CGTAGCGTGCTATCACTGGATCCAGTTTTCAATCTGTCG	PacBio sequencing of CAN1
CAN_F14	ATGCTGATGACTGCGATGGATCCAGTTTTCAATCTGTCG	PacBio sequencing of CAN1
CAN_F15	TGCGTGAGCTGTACATTGGATCCAGTTTTCAATCTGTCG	PacBio sequencing of CAN1
CAN_F16	CGATCATCTATAGACATGGATCCAGTTTTCAATCTGTCG	PacBio sequencing of CAN1
CAN_F17	CGACGTATCTGACAGTTGGATCCAGTTTTCAATCTGTCG	PacBio sequencing of CAN1
CAN_F18	CACGTCACTAGAGCGATGGATCCAGTTTTCAATCTGTCG	PacBio sequencing of CAN1
CAN_F19	TGTCGCAGCTACTAGTTGGATCCAGTTTTCAATCTGTCG	PacBio sequencing of CAN1
CAN_F20	CATACGCTGTGTAGCATGGATCCAGTTTTCAATCTGTCG	PacBio sequencing of CAN1
CAN_F21	AGTCGCATGACTGTGTTGGATCCAGTTTTCAATCTGTCG	PacBio sequencing of CAN1
CAN_F22	CAGTACTGCACGATCGTGGATCCAGTTTTCAATCTGTCG	PacBio sequencing of CAN1
CAN_F23	GTGCTGAGCATCAGACTGGATCCAGTTTTCAATCTGTCG	PacBio sequencing of CAN1
CAN_F24	CACTGATCGATATGCATGGATCCAGTTTTCAATCTGTCG	PacBio sequencing of CAN1
CAN_F25	TACAGTGTCTGCTGCGTGGATCCAGTTTTCAATCTGTCG	PacBio sequencing of CAN1
CAN_F26	TACAGATAGTGTAGCGTGGATCCAGTTTTCAATCTGTCG	PacBio sequencing of CAN1
CAN_F27	TCGTAGAGCTCGAGACTGGATCCAGTTTTCAATCTGTCG	PacBio sequencing of CAN1
CAN_F28	GAGCTGCGCACTCGATTGGATCCAGTTTTCAATCTGTCG	PacBio sequencing of CAN1
CAN_F29	GCGATGTCGCTATGTGTGGATCCAGTTTTCAATCTGTCG	PacBio sequencing of CAN1
CAN_F30	CGAGAGTCAGCGCATATGGATCCAGTTTTCAATCTGTCG	PacBio sequencing of CAN1
CAN_F31	TCACGATGAGCACGTATGGATCCAGTTTTCAATCTGTCG	PacBio sequencing of CAN1
CAN_F32	GACTGAGATCATGATCTGGATCCAGTTTTCAATCTGTCG	PacBio sequencing of CAN1
CAN_F33	ACGACATGATACTGCTTGGATCCAGTTTTCAATCTGTCG	PacBio sequencing of CAN1
CAN_F34	ATACAGCACAGATGTGTGGATCCAGTTTTCAATCTGTCG	PacBio sequencing of CAN1
CAN_F35	ACAGTCGATATCTCTCTGGATCCAGTTTTCAATCTGTCG	PacBio sequencing of CAN1
CAN_F36	GCTCGATCACATGACGTGGATCCAGTTTTCAATCTGTCG	PacBio sequencing of CAN1
canTM_F1	gcgctctgtgtgcagcAAGAGTGGTTGCGAACAGAGTAAACC	PacBio sequencing of CAN1
canTM_F2	tcatgagtcgacactaAAGAGTGGTTGCGAACAGAGTAAACC	PacBio sequencing of CAN1
canTM_F3	tatctatcgtatacgcAAGAGTGGTTGCGAACAGAGTAAACC	PacBio sequencing of CAN1
canTM_F4	atcacactgcatctgaAAGAGTGGTTGCGAACAGAGTAAACC	PacBio sequencing of CAN1
canTM_F5	acgtacgctcgtcataAAGAGTGGTTGCGAACAGAGTAAACC	PacBio sequencing of CAN1
canTM_F6	tgtgagtcagtacgcgAAGAGTGGTTGCGAACAGAGTAAACC	PacBio sequencing of CAN1
canTM_F7	agagacacgatactcaAAGAGTGGTTGCGAACAGAGTAAACC	PacBio sequencing of CAN1
canTM_F8	ctgctagagtctacagAAGAGTGGTTGCGAACAGAGTAAACC	PacBio sequencing of CAN1
canTM_F9	agcactcgcgtcagtgAAGAGTGGTTGCGAACAGAGTAAACC	PacBio sequencing of CAN1
canTM_F10	tcatgcacgtctcgctAAGAGTGGTTGCGAACAGAGTAAACC	PacBio sequencing of CAN1
canTM_F11	agagcatctctgtactAAGAGTGGTTGCGAACAGAGTAAACC	PacBio sequencing of CAN1
canTM_F12	cgcatcgactacgctaAAGAGTGGTTGCGAACAGAGTAAACC	PacBio sequencing of CAN1
canTM_F13	cgtagcgtgctatcacAAGAGTGGTTGCGAACAGAGTAAACC	PacBio sequencing of CAN1
canTM_F14	atgctgatgactgcgaAAGAGTGGTTGCGAACAGAGTAAACC	PacBio sequencing of CAN1
canTM_F15	tgcgtgagctgtacatAAGAGTGGTTGCGAACAGAGTAAACC	PacBio sequencing of CAN1
canTM_F16	cgatcatctatagacaAAGAGTGGTTGCGAACAGAGTAAACC	PacBio sequencing of CAN1
canTM_F17	cgacgtatctgacagtAAGAGTGGTTGCGAACAGAGTAAACC	PacBio sequencing of CAN1
canTM_F18	cacgtcactagagcgaAAGAGTGGTTGCGAACAGAGTAAACC	PacBio sequencing of CAN1
canTM_F19	tgtcgcagctactagtAAGAGTGGTTGCGAACAGAGTAAACC	PacBio sequencing of CAN1
canTM_F20	catacgctgtgtagcaAAGAGTGGTTGCGAACAGAGTAAACC	PacBio sequencing of CAN1
canTM_F21	agtcgcatgactgtgtAAGAGTGGTTGCGAACAGAGTAAACC	PacBio sequencing of CAN1
canTM_F22	cagtactgcacgatcgAAGAGTGGTTGCGAACAGAGTAAACC	PacBio sequencing of CAN1
canTM_F23	gtgctgagcatcagacAAGAGTGGTTGCGAACAGAGTAAACC	PacBio sequencing of CAN1
canTM_F24	cactgatcgatatgcaAAGAGTGGTTGCGAACAGAGTAAACC	PacBio sequencing of CAN1
canTM_F25	tacagtgtctgctgcgAAGAGTGGTTGCGAACAGAGTAAACC	PacBio sequencing of CAN1
canTM_F26	tacagatagtgtagcgAAGAGTGGTTGCGAACAGAGTAAACC	PacBio sequencing of CAN1
canTM_F27	tcgtagagctcgagacAAGAGTGGTTGCGAACAGAGTAAACC	PacBio sequencing of CAN1
canTM_F28	gagctgcgcactcgatAAGAGTGGTTGCGAACAGAGTAAACC	PacBio sequencing of CAN1
canTM_F29	gcgatgtcgctatgtgAAGAGTGGTTGCGAACAGAGTAAACC	PacBio sequencing of CAN1
canTM_F30	cgagagtcagcgcataAAGAGTGGTTGCGAACAGAGTAAACC	PacBio sequencing of CAN1
canTM_F31	tcacgatgagcacgtaAAGAGTGGTTGCGAACAGAGTAAACC	PacBio sequencing of CAN1
canTM_F32	gactgagatcatgatcAAGAGTGGTTGCGAACAGAGTAAACC	PacBio sequencing of CAN1
canTM_R28	ctagacgtacatgtcgTATGAGGGTGAGAATGCGAAATGGCG	PacBio sequencing of CAN1
canTM_R29	tagcagtcactgtgcgTATGAGGGTGAGAATGCGAAATGGCG	PacBio sequencing of CAN1
canTM_R30	cgtcatgcgatagctaTATGAGGGTGAGAATGCGAAATGGCG	PacBio sequencing of CAN1
canTM_R31	gcgcagtcgtctgtatTATGAGGGTGAGAATGCGAAATGGCG	PacBio sequencing of CAN1
canTM_R32	atgagctacgtacagaTATGAGGGTGAGAATGCGAAATGGCG	PacBio sequencing of CAN1
canTM_R33	gtcgcgagtctatcagTATGAGGGTGAGAATGCGAAATGGCG	PacBio sequencing of CAN1
canTM_R34	acatcgatctgcactaTATGAGGGTGAGAATGCGAAATGGCG	PacBio sequencing of CAN1
canTM_R35	agtatagcatagacgcTATGAGGGTGAGAATGCGAAATGGCG	PacBio sequencing of CAN1
canTM_R36	gtgagagcgtgactctTATGAGGGTGAGAATGCGAAATGGCG	PacBio sequencing of CAN1
canTM_R37	tgtcagtagatgactcTATGAGGGTGAGAATGCGAAATGGCG	PacBio sequencing of CAN1
canTM_R38	tcgtacgagatcgacaTATGAGGGTGAGAATGCGAAATGGCG	PacBio sequencing of CAN1
canTM_R39	ctacatgtgactcgagTATGAGGGTGAGAATGCGAAATGGCG	PacBio sequencing of CAN1
canTM_R40	gcgctatagtgctcgtTATGAGGGTGAGAATGCGAAATGGCG	PacBio sequencing of CAN1
oTM-092	TATGAGGGTGAGAATGCGAAATGGCG	CAN1 PCR for Sanger Sequencing
oTM-093	AAGAGTGGTTGCGAACAGAGTAAACC	CAN1 PCR for Sanger Sequencing
oTM-094	TTGCCACATATCTTCAACGCTGTT	CAN1 Sanger Sequencing
oTM-095	AAACTTTGTCACCACCAGTAGATGT	CAN1 Sanger Sequencing
seqDG-91	TTTGACAGGGAACAAGTT	CAN1 Sanger Sequencing

## Sheet: 1e
Supplemental File 1e: CAN1 Sequencing from untreated and MMS-treated yeast
CAN-R Isolate	Genotype	Vector	Treatment	Strain	Barcodes	Reference Nucleotide(s)	Variant Nucleotide(s)	Polymorphism	Minimum	Maximum	Length	Coverage	Variant Sequences	Variant Raw Frequency	Variant Frequency	Variant P-Value (approximate)	# of times observed	Mutations per isolate	Distance Between Mutation	Deletion Length	Insertion Length
A1	csm2Δ	pEMPTY	no_MMS	KBY-824-10C	GCGCTCTGTGTGCAGCTGGATCCAGTTTTCAATCTGTCG_GTCTCTGCGATACAGCGGGTGAGAATGCGAAATGGC	G	T	SNP	679	679	1	60	m54363_200520_231838/10355108/ccs, m54363_200520_231838/10748892/ccs, m54363_200520_231838/12452583/ccs, m54363_200520_231838/12583394/ccs, m54363_200520_231838/13107825/ccs, m54363_200520_231838/15729376/ccs, m54363_200520_231838/17498313/ccs, m54363_200520_231838/18613240/ccs, m54363_200520_231838/19006413/ccs, m54363_200520_231838/22741562/ccs, m54363_200520_231838/23396642/ccs, m54363_200520_…	60	1	1e-120	2	1
A10	csm2Δ	pEMPTY	no_MMS	KBY-824-10C	CGACGTATCTGACAGTTGGATCCAGTTTTCAATCTGTCG_AGTATGAGATAGCTCGGGGTGAGAATGCGAAATGGC	G	A	SNP	858	858	1	128	m54363_200520_231838/10813623/ccs, m54363_200520_231838/12845647/ccs, m54363_200520_231838/13435678/ccs, m54363_200520_231838/13631791/ccs, m54363_200520_231838/13763195/ccs, m54363_200520_231838/13828195/ccs, m54363_200520_231838/14352724/ccs, m54363_200520_231838/14483835/ccs, m54363_200520_231838/14549191/ccs, m54363_200520_231838/15008509/ccs, m54363_200520_231838/15138977/ccs, m54363_200520_…	126	0.984	8e-249	5	1
A11	csm2Δ	pEMPTY	no_MMS	KBY-824-10C	TACAGTGTCTGCTGCGTGGATCCAGTTTTCAATCTGTCG_AGTATGAGATAGCTCGGGGTGAGAATGCGAAATGGC	G	A	SNP	267	267	1	83	m54363_200520_231838/12321200/ccs, m54363_200520_231838/13172949/ccs, m54363_200520_231838/13566812/ccs, m54363_200520_231838/15991281/ccs, m54363_200520_231838/16122766/ccs, m54363_200520_231838/16187780/ccs, m54363_200520_231838/17629641/ccs, m54363_200520_231838/17694998/ccs, m54363_200520_231838/18546941/ccs, m54363_200520_231838/19006134/ccs, m54363_200520_231838/19137327/ccs, m54363_200520_…	83	1	1e-166	2	2	1
A11	csm2Δ	pEMPTY	no_MMS	KBY-824-10C	TACAGTGTCTGCTGCGTGGATCCAGTTTTCAATCTGTCG_AGTATGAGATAGCTCGGGGTGAGAATGCGAAATGGC	C	T	SNP	268	268	1	83	m54363_200520_231838/12321200/ccs, m54363_200520_231838/13172949/ccs, m54363_200520_231838/13566812/ccs, m54363_200520_231838/15991281/ccs, m54363_200520_231838/16122766/ccs, m54363_200520_231838/16187780/ccs, m54363_200520_231838/17629641/ccs, m54363_200520_231838/17694998/ccs, m54363_200520_231838/18546941/ccs, m54363_200520_231838/19006134/ccs, m54363_200520_231838/19137327/ccs, m54363_200520_…	83	1	1e-166	5	2
A12	csm2Δ	pEMPTY	no_MMS	KBY-824-10C	GCGCTCTGTGTGCAGCTGGATCCAGTTTTCAATCTGTCG_GCGCAGACTACGTGTGGGGTGAGAATGCGAAATGGC	T	G	SNP	263	263	1	91	m54363_200520_231838/10944717/ccs, m54363_200520_231838/11076017/ccs, m54363_200520_231838/11206793/ccs, m54363_200520_231838/11665749/ccs, m54363_200520_231838/11797490/ccs, m54363_200520_231838/12386406/ccs, m54363_200520_231838/13435442/ccs, m54363_200520_231838/13631824/ccs, m54363_200520_231838/13697180/ccs, m54363_200520_231838/14287037/ccs, m54363_200520_231838/15007867/ccs, m54363_200520_…	91	1	1e-182	2	1
A2	csm2Δ	pEMPTY	no_MMS	KBY-824-10C	AGCACTCGCGTCAGTGTGGATCCAGTTTTCAATCTGTCG_GCGCAGACTACGTGTGGGGTGAGAATGCGAAATGGC	C	G	SNP	1214	1214	1	73	m54363_200520_231838/10552180/ccs, m54363_200520_231838/11207402/ccs, m54363_200520_231838/11403516/ccs, m54363_200520_231838/11796598/ccs, m54363_200520_231838/13566733/ccs, m54363_200520_231838/14221840/ccs, m54363_200520_231838/15007909/ccs, m54363_200520_231838/16974015/ccs, m54363_200520_231838/17039810/ccs, m54363_200520_231838/17105350/ccs, m54363_200520_231838/17105420/ccs, m54363_200520_…	71	0.973	2.6e-139	90	1
A3	csm2Δ	pEMPTY	no_MMS	KBY-824-10C	CGACGTATCTGACAGTTGGATCCAGTTTTCAATCTGTCG_GCGCAGACTACGTGTGGGGTGAGAATGCGAAATGGC	T	G	SNP	1148	1148	1	81	m54363_200520_231838/10682479/ccs, m54363_200520_231838/11993277/ccs, m54363_200520_231838/13107843/ccs, m54363_200520_231838/13369945/ccs, m54363_200520_231838/13631874/ccs, m54363_200520_231838/13894160/ccs, m54363_200520_231838/13894481/ccs, m54363_200520_231838/14222217/ccs, m54363_200520_231838/14614861/ccs, m54363_200520_231838/18088714/ccs, m54363_200520_231838/19333931/ccs, m54363_200520_…	80	0.988	8e-159	1	1
A4	csm2Δ	pEMPTY	no_MMS	KBY-824-10C	TACAGTGTCTGCTGCGTGGATCCAGTTTTCAATCTGTCG_GCGCAGACTACGTGTGGGGTGAGAATGCGAAATGGC	G	T	SNP	247	247	1	81	m54363_200520_231838/10486611/ccs, m54363_200520_231838/10551520/ccs, m54363_200520_231838/10748784/ccs, m54363_200520_231838/11927695/ccs, m54363_200520_231838/12255488/ccs, m54363_200520_231838/14549482/ccs, m54363_200520_231838/14942702/ccs, m54363_200520_231838/16908518/ccs, m54363_200520_231838/18088663/ccs, m54363_200520_231838/19595779/ccs, m54363_200520_231838/20644618/ccs, m54363_200520_…	81	1	1e-162	2	1
A5	csm2Δ	pEMPTY	no_MMS	KBY-824-10C	AGCACTCGCGTCAGTGTGGATCCAGTTTTCAATCTGTCG_GTCTCTGCGATACAGCGGGTGAGAATGCGAAATGGC	G	DEL	Deletion	767	767	1	174	m54363_200520_231838/10224599/ccs, m54363_200520_231838/10354903/ccs, m54363_200520_231838/10420369/ccs, m54363_200520_231838/10420745/ccs, m54363_200520_231838/10421072/ccs, m54363_200520_231838/11272414/ccs, m54363_200520_231838/12452316/ccs, m54363_200520_231838/12517566/ccs, m54363_200520_231838/12911482/ccs, m54363_200520_231838/13173510/ccs, m54363_200520_231838/13763439/ccs, m54363_200520_…	172	0.989	1.2e-168	0	1		1
A6	csm2Δ	pEMPTY	no_MMS	KBY-824-10C	CGACGTATCTGACAGTTGGATCCAGTTTTCAATCTGTCG_GTCTCTGCGATACAGCGGGTGAGAATGCGAAATGGC	T	A	SNP	1500	1500	1	92	m54363_200520_231838/12452420/ccs, m54363_200520_231838/12452664/ccs, m54363_200520_231838/13632215/ccs, m54363_200520_231838/13894037/ccs, m54363_200520_231838/14221499/ccs, m54363_200520_231838/14746156/ccs, m54363_200520_231838/17170521/ccs, m54363_200520_231838/17302334/ccs, m54363_200520_231838/17432931/ccs, m54363_200520_231838/18350356/ccs, m54363_200520_231838/21496015/ccs, m54363_200520_…	92	1	1e-184	1	1
A7	csm2Δ	pEMPTY	no_MMS	KBY-824-10C	TACAGTGTCTGCTGCGTGGATCCAGTTTTCAATCTGTCG_GTCTCTGCGATACAGCGGGTGAGAATGCGAAATGGC	T	A	SNP	380	380	1	79	m54363_200520_231838/10552248/ccs, m54363_200520_231838/10879242/ccs, m54363_200520_231838/12189975/ccs, m54363_200520_231838/13501130/ccs, m54363_200520_231838/14680400/ccs, m54363_200520_231838/14876877/ccs, m54363_200520_231838/14877008/ccs, m54363_200520_231838/15007893/ccs, m54363_200520_231838/18350682/ccs, m54363_200520_231838/19268479/ccs, m54363_200520_231838/19923534/ccs, m54363_200520_…	79	1	1e-158	2	1
A8	csm2Δ	pEMPTY	no_MMS	KBY-824-10C	GCGCTCTGTGTGCAGCTGGATCCAGTTTTCAATCTGTCG_AGTATGAGATAGCTCGGGGTGAGAATGCGAAATGGC	T	DEL	Deletion	1192	1192	1	100	m54363_200520_231838/10092977/ccs, m54363_200520_231838/10748834/ccs, m54363_200520_231838/10879721/ccs, m54363_200520_231838/11141363/ccs, m54363_200520_231838/11141696/ccs, m54363_200520_231838/12452725/ccs, m54363_200520_231838/12780164/ccs, m54363_200520_231838/12845609/ccs, m54363_200520_231838/13434956/ccs, m54363_200520_231838/13501358/ccs, m54363_200520_231838/14287278/ccs, m54363_200520_…	99	0.99	9e-98	0	1		1
A9	csm2Δ	pEMPTY	no_MMS	KBY-824-10C	AGCACTCGCGTCAGTGTGGATCCAGTTTTCAATCTGTCG_AGTATGAGATAGCTCGGGGTGAGAATGCGAAATGGC	G	A	SNP	1623	1623	1	181	m54363_200520_231838/10485875/ccs, m54363_200520_231838/10748329/ccs, m54363_200520_231838/11731107/ccs, m54363_200520_231838/12386806/ccs, m54363_200520_231838/12517914/ccs, m54363_200520_231838/12714899/ccs, m54363_200520_231838/13041787/ccs, m54363_200520_231838/13828889/ccs, m54363_200520_231838/13959347/ccs, m54363_200520_231838/14287574/ccs, m54363_200520_231838/14352860/ccs, m54363_200520_…	181	1	0	34	1
B1	csm2Δ	pEMPTY	no_MMS	KBY-824-10C	TCATGAGTCGACACTATGGATCCAGTTTTCAATCTGTCG_GTCTCTGCGATACAGCGGGTGAGAATGCGAAATGGC	INS	T	Insertion	321	320	0	90	m54363_200520_231838/10289246/ccs, m54363_200520_231838/11141533/ccs, m54363_200520_231838/12189862/ccs, m54363_200520_231838/12452229/ccs, m54363_200520_231838/13369640/ccs, m54363_200520_231838/13697793/ccs, m54363_200520_231838/13894330/ccs, m54363_200520_231838/13960067/ccs, m54363_200520_231838/14483646/ccs, m54363_200520_231838/16253709/ccs, m54363_200520_231838/16384807/ccs, m54363_200520_…	90	1	1e-180	0	1			1
B10	csm2Δ	pEMPTY	no_MMS	KBY-824-10C	CACGTCACTAGAGCGATGGATCCAGTTTTCAATCTGTCG_AGTATGAGATAGCTCGGGGTGAGAATGCGAAATGGC	C	T	SNP	1633	1633	1	90	m54363_200520_231838/11469112/ccs, m54363_200520_231838/12976512/ccs, m54363_200520_231838/13042019/ccs, m54363_200520_231838/14091102/ccs, m54363_200520_231838/15335834/ccs, m54363_200520_231838/16187490/ccs, m54363_200520_231838/17563997/ccs, m54363_200520_231838/18154368/ccs, m54363_200520_231838/18744017/ccs, m54363_200520_231838/19202221/ccs, m54363_200520_231838/19333450/ccs, m54363_200520_…	89	0.989	8.9e-177	26	2	1
B10	csm2Δ	pEMPTY	no_MMS	KBY-824-10C	CACGTCACTAGAGCGATGGATCCAGTTTTCAATCTGTCG_AGTATGAGATAGCTCGGGGTGAGAATGCGAAATGGC	INS	G	Insertion	1634	1633	0	90	m54363_200520_231838/11469112/ccs, m54363_200520_231838/12976512/ccs, m54363_200520_231838/13042019/ccs, m54363_200520_231838/14091102/ccs, m54363_200520_231838/15335834/ccs, m54363_200520_231838/16187490/ccs, m54363_200520_231838/17563997/ccs, m54363_200520_231838/18154368/ccs, m54363_200520_231838/18744017/ccs, m54363_200520_231838/19202221/ccs, m54363_200520_231838/19333450/ccs, m54363_200520_…	89	0.989	8.9e-177	0	2			1
B11	csm2Δ	pEMPTY	no_MMS	KBY-824-10C	TACAGATAGTGTAGCGTGGATCCAGTTTTCAATCTGTCG_AGTATGAGATAGCTCGGGGTGAGAATGCGAAATGGC	G	T	SNP	424	424	1	126	m54363_200520_231838/10683219/ccs, m54363_200520_231838/12255337/ccs, m54363_200520_231838/12321703/ccs, m54363_200520_231838/13041943/ccs, m54363_200520_231838/13500906/ccs, m54363_200520_231838/13631590/ccs, m54363_200520_231838/14091105/ccs, m54363_200520_231838/14091216/ccs, m54363_200520_231838/15204541/ccs, m54363_200520_231838/15204568/ccs, m54363_200520_231838/15729498/ccs, m54363_200520_…	125	0.992	1.2e-248	2	1
B12	csm2Δ	pEMPTY	no_MMS	KBY-824-10C	TCATGAGTCGACACTATGGATCCAGTTTTCAATCTGTCG_GCGCAGACTACGTGTGGGGTGAGAATGCGAAATGGC	G	A	SNP	509	509	1	68	m54363_200520_231838/10420508/ccs, m54363_200520_231838/11010926/ccs, m54363_200520_231838/12845722/ccs, m54363_200520_231838/14418149/ccs, m54363_200520_231838/14811277/ccs, m54363_200520_231838/15270197/ccs, m54363_200520_231838/17367794/ccs, m54363_200520_231838/18874952/ccs, m54363_200520_231838/18940341/ccs, m54363_200520_231838/19202257/ccs, m54363_200520_231838/19465165/ccs, m54363_200520_…	68	1	1e-136	4	1
B2	csm2Δ	pEMPTY	no_MMS	KBY-824-10C	TCATGCACGTCTCGCTTGGATCCAGTTTTCAATCTGTCG_GCGCAGACTACGTGTGGGGTGAGAATGCGAAATGGC	G	T	SNP	925	925	1	77	m54363_200520_231838/10617476/ccs, m54363_200520_231838/10944892/ccs, m54363_200520_231838/11796630/ccs, m54363_200520_231838/13631913/ccs, m54363_200520_231838/13959891/ccs, m54363_200520_231838/14877213/ccs, m54363_200520_231838/15597736/ccs, m54363_200520_231838/17629967/ccs, m54363_200520_231838/18219349/ccs, m54363_200520_231838/19333439/ccs, m54363_200520_231838/19333721/ccs, m54363_200520_…	77	1	1e-154	1	2	1
B2	csm2Δ	pEMPTY	no_MMS	KBY-824-10C	TCATGCACGTCTCGCTTGGATCCAGTTTTCAATCTGTCG_GCGCAGACTACGTGTGGGGTGAGAATGCGAAATGGC	A	T	SNP	926	926	1	77	m54363_200520_231838/10617476/ccs, m54363_200520_231838/10944892/ccs, m54363_200520_231838/11796630/ccs, m54363_200520_231838/13631913/ccs, m54363_200520_231838/13959891/ccs, m54363_200520_231838/14877213/ccs, m54363_200520_231838/15597736/ccs, m54363_200520_231838/17629967/ccs, m54363_200520_231838/18219349/ccs, m54363_200520_231838/19333439/ccs, m54363_200520_231838/19333721/ccs, m54363_200520_…	77	1	1e-154	2	2
B3	csm2Δ	pEMPTY	no_MMS	KBY-824-10C	CACGTCACTAGAGCGATGGATCCAGTTTTCAATCTGTCG_GCGCAGACTACGTGTGGGGTGAGAATGCGAAATGGC	T	DEL	Deletion	625	625	1	80	m54363_200520_231838/11207349/ccs, m54363_200520_231838/11993435/ccs, m54363_200520_231838/11993796/ccs, m54363_200520_231838/12190113/ccs, m54363_200520_231838/12320976/ccs, m54363_200520_231838/13042608/ccs, m54363_200520_231838/14287427/ccs, m54363_200520_231838/14484341/ccs, m54363_200520_231838/16581580/ccs, m54363_200520_231838/17039458/ccs, m54363_200520_231838/17891472/ccs, m54363_200520_…	78	0.975	2.6e-75	0	1		1
B4	csm2Δ	pEMPTY	no_MMS	KBY-824-10C	TACAGATAGTGTAGCGTGGATCCAGTTTTCAATCTGTCG_GCGCAGACTACGTGTGGGGTGAGAATGCGAAATGGC	T	DEL	Deletion	329	329	1	29	m54363_200520_231838/12058817/ccs, m54363_200520_231838/12583044/ccs, m54363_200520_231838/13960153/ccs, m54363_200520_231838/18547152/ccs, m54363_200520_231838/20906836/ccs, m54363_200520_231838/24380276/ccs, m54363_200520_231838/30081907/ccs, m54363_200520_231838/36373373/ccs, m54363_200520_231838/37618591/ccs, m54363_200520_231838/39911509/ccs, m54363_200520_231838/41616072/ccs, m54363_200520_…	29	1	1e-29	0	1		1
B5	csm2Δ	pEMPTY	no_MMS	KBY-824-10C	TCATGCACGTCTCGCTTGGATCCAGTTTTCAATCTGTCG_GTCTCTGCGATACAGCGGGTGAGAATGCGAAATGGC	T	DEL	Deletion	1192	1192	1	74	m54363_200520_231838/11862566/ccs, m54363_200520_231838/12845538/ccs, m54363_200520_231838/13107627/ccs, m54363_200520_231838/14156145/ccs, m54363_200520_231838/14615523/ccs, m54363_200520_231838/14877610/ccs, m54363_200520_231838/15007855/ccs, m54363_200520_231838/15794903/ccs, m54363_200520_231838/17432650/ccs, m54363_200520_231838/18022687/ccs, m54363_200520_231838/20054417/ccs, m54363_200520_…	74	1	1e-74	0	1		1
B6	csm2Δ	pEMPTY	no_MMS	KBY-824-10C	CACGTCACTAGAGCGATGGATCCAGTTTTCAATCTGTCG_GTCTCTGCGATACAGCGGGTGAGAATGCGAAATGGC	C	G	SNP	591	591	1	104	m54363_200520_231838/10486069/ccs, m54363_200520_231838/12059467/ccs, m54363_200520_231838/12321738/ccs, m54363_200520_231838/13566839/ccs, m54363_200520_231838/13828783/ccs, m54363_200520_231838/14155991/ccs, m54363_200520_231838/14353081/ccs, m54363_200520_231838/15401780/ccs, m54363_200520_231838/15728755/ccs, m54363_200520_231838/16318975/ccs, m54363_200520_231838/16449881/ccs, m54363_200520_…	103	0.99	1e-204	2	1
B7	csm2Δ	pEMPTY	no_MMS	KBY-824-10C	TACAGATAGTGTAGCGTGGATCCAGTTTTCAATCTGTCG_GTCTCTGCGATACAGCGGGTGAGAATGCGAAATGGC	G	DEL	Deletion	1577	1577	1	98	m54363_200520_231838/10486540/ccs, m54363_200520_231838/11010845/ccs, m54363_200520_231838/11272701/ccs, m54363_200520_231838/11665583/ccs, m54363_200520_231838/12779842/ccs, m54363_200520_231838/13500695/ccs, m54363_200520_231838/14091199/ccs, m54363_200520_231838/15270173/ccs, m54363_200520_231838/17695137/ccs, m54363_200520_231838/18416505/ccs, m54363_200520_231838/18678504/ccs, m54363_200520_…	97	0.99	8.8e-96	0	1		1
B8	csm2Δ	pEMPTY	no_MMS	KBY-824-10C	TCATGAGTCGACACTATGGATCCAGTTTTCAATCTGTCG_AGTATGAGATAGCTCGGGGTGAGAATGCGAAATGGC	C	G	SNP	1244	1244	1	130	m54363_200520_231838/11010485/ccs, m54363_200520_231838/11469537/ccs, m54363_200520_231838/12583903/ccs, m54363_200520_231838/12779651/ccs, m54363_200520_231838/13369607/ccs, m54363_200520_231838/13566094/ccs, m54363_200520_231838/13893927/ccs, m54363_200520_231838/14156393/ccs, m54363_200520_231838/15204485/ccs, m54363_200520_231838/15728981/ccs, m54363_200520_231838/16777888/ccs, m54363_200520_…	129	0.992	1.3e-256	24	1
B9	csm2Δ	pEMPTY	no_MMS	KBY-824-10C	TCATGCACGTCTCGCTTGGATCCAGTTTTCAATCTGTCG_AGTATGAGATAGCTCGGGGTGAGAATGCGAAATGGC	T	C	SNP	1174	1174	1	132	m54363_200520_231838/10158745/ccs, m54363_200520_231838/10814186/ccs, m54363_200520_231838/10945304/ccs, m54363_200520_231838/11272364/ccs, m54363_200520_231838/11600443/ccs, m54363_200520_231838/11665871/ccs, m54363_200520_231838/12256158/ccs, m54363_200520_231838/12648569/ccs, m54363_200520_231838/14025401/ccs, m54363_200520_231838/14221466/ccs, m54363_200520_231838/14877063/ccs, m54363_200520_…	131	0.992	1.3e-260	2	1
C1	csm2Δ	pEMPTY	no_MMS	KBY-824-10C	TATCTATCGTATACGCTGGATCCAGTTTTCAATCTGTCG_GTCTCTGCGATACAGCGGGTGAGAATGCGAAATGGC	C	G	SNP	11	11	1	120	m54363_200520_231838/10290124/ccs, m54363_200520_231838/11927736/ccs, m54363_200520_231838/12124377/ccs, m54363_200520_231838/12255952/ccs, m54363_200520_231838/12452831/ccs, m54363_200520_231838/12714672/ccs, m54363_200520_231838/12780027/ccs, m54363_200520_231838/13108030/ccs, m54363_200520_231838/15467502/ccs, m54363_200520_231838/15795173/ccs, m54363_200520_231838/16122357/ccs, m54363_200520_…	120	1	1e-240	18	1
C10	csm2Δ	pEMPTY	no_MMS	KBY-824-10C	TGTCGCAGCTACTAGTTGGATCCAGTTTTCAATCTGTCG_AGTATGAGATAGCTCGGGGTGAGAATGCGAAATGGC	C	T	SNP	1426	1426	1	156	m54363_200520_231838/10879499/ccs, m54363_200520_231838/11534821/ccs, m54363_200520_231838/11928160/ccs, m54363_200520_231838/12256143/ccs, m54363_200520_231838/12321415/ccs, m54363_200520_231838/12649277/ccs, m54363_200520_231838/12976598/ccs, m54363_200520_231838/13632098/ccs, m54363_200520_231838/13763352/ccs, m54363_200520_231838/13894414/ccs, m54363_200520_231838/14156011/ccs, m54363_200520_…	154	0.987	1.2e-304	4	1
C11	csm2Δ	pEMPTY	no_MMS	KBY-824-10C	TCGTAGAGCTCGAGACTGGATCCAGTTTTCAATCTGTCG_AGTATGAGATAGCTCGGGGTGAGAATGCGAAATGGC	G	DEL	Deletion	628	628	1	50	m54363_200520_231838/12190163/ccs, m54363_200520_231838/14025349/ccs, m54363_200520_231838/14746399/ccs, m54363_200520_231838/14811221/ccs, m54363_200520_231838/15007995/ccs, m54363_200520_231838/15073604/ccs, m54363_200520_231838/19660960/ccs, m54363_200520_231838/20775381/ccs, m54363_200520_231838/22217703/ccs, m54363_200520_231838/24248658/ccs, m54363_200520_231838/27066573/ccs, m54363_200520_…	49	0.98	4.5e-48	0	1		1
C12	csm2Δ	pEMPTY	no_MMS	KBY-824-10C	TATCTATCGTATACGCTGGATCCAGTTTTCAATCTGTCG_GCGCAGACTACGTGTGGGGTGAGAATGCGAAATGGC	C	DEL	Deletion	864	864	1	97	m54363_200520_231838/10355364/ccs, m54363_200520_231838/11010626/ccs, m54363_200520_231838/11469130/ccs, m54363_200520_231838/14353012/ccs, m54363_200520_231838/14549714/ccs, m54363_200520_231838/15074012/ccs, m54363_200520_231838/15270644/ccs, m54363_200520_231838/15991028/ccs, m54363_200520_231838/17105694/ccs, m54363_200520_231838/17171082/ccs, m54363_200520_231838/18023193/ccs, m54363_200520_…	97	1	1e-97	0	1		1
C2	csm2Δ	pEMPTY	no_MMS	KBY-824-10C	AGAGCATCTCTGTACTTGGATCCAGTTTTCAATCTGTCG_GCGCAGACTACGTGTGGGGTGAGAATGCGAAATGGC	C	DEL	Deletion	1365	1365	1	122	m54363_200520_231838/10814164/ccs, m54363_200520_231838/10879869/ccs, m54363_200520_231838/12255666/ccs, m54363_200520_231838/12452233/ccs, m54363_200520_231838/12517935/ccs, m54363_200520_231838/12714081/ccs, m54363_200520_231838/14746331/ccs, m54363_200520_231838/15008218/ccs, m54363_200520_231838/15335691/ccs, m54363_200520_231838/15663746/ccs, m54363_200520_231838/15729267/ccs, m54363_200520_…	121	0.992	1.1e-119	0	1		1
C3	csm2Δ	pEMPTY	no_MMS	KBY-824-10C	TGTCGCAGCTACTAGTTGGATCCAGTTTTCAATCTGTCG_GCGCAGACTACGTGTGGGGTGAGAATGCGAAATGGC	G	A	SNP	788	788	1	108	m54363_200520_231838/10814405/ccs, m54363_200520_231838/11010412/ccs, m54363_200520_231838/11272551/ccs, m54363_200520_231838/11403972/ccs, m54363_200520_231838/12387281/ccs, m54363_200520_231838/13369648/ccs, m54363_200520_231838/13369806/ccs, m54363_200520_231838/13435359/ccs, m54363_200520_231838/14877114/ccs, m54363_200520_231838/14942674/ccs, m54363_200520_231838/15794928/ccs, m54363_200520_…	106	0.981	5.7e-209	8	1
C4	csm2Δ	pEMPTY	no_MMS	KBY-824-10C	TCGTAGAGCTCGAGACTGGATCCAGTTTTCAATCTGTCG_GCGCAGACTACGTGTGGGGTGAGAATGCGAAATGGC	C	DEL	Deletion	770	770	1	20	m54363_200520_231838/17564281/ccs, m54363_200520_231838/19792791/ccs, m54363_200520_231838/31130057/ccs, m54363_200520_231838/35652089/ccs, m54363_200520_231838/39518992/ccs, m54363_200520_231838/47317060/ccs, m54363_200520_231838/49021501/ccs, m54363_200520_231838/51380413/ccs, m54363_200520_231838/51576897/ccs, m54363_200520_231838/55116579/ccs, m54363_200520_231838/58261879/ccs, m54363_200520_…	20	1	1e-20	0	1		1
C5	csm2Δ	pEMPTY	no_MMS	KBY-824-10C	AGAGCATCTCTGTACTTGGATCCAGTTTTCAATCTGTCG_GTCTCTGCGATACAGCGGGTGAGAATGCGAAATGGC	T	C	SNP	905	905	1	111	m54363_200520_231838/10092686/ccs, m54363_200520_231838/10420783/ccs, m54363_200520_231838/10944859/ccs, m54363_200520_231838/11338225/ccs, m54363_200520_231838/11797287/ccs, m54363_200520_231838/11928480/ccs, m54363_200520_231838/12059122/ccs, m54363_200520_231838/13238488/ccs, m54363_200520_231838/13762844/ccs, m54363_200520_231838/13959905/ccs, m54363_200520_231838/14025038/ccs, m54363_200520_…	110	0.991	1.1e-218	1	1
C6	csm2Δ	pEMPTY	no_MMS	KBY-824-10C	TGTCGCAGCTACTAGTTGGATCCAGTTTTCAATCTGTCG_GTCTCTGCGATACAGCGGGTGAGAATGCGAAATGGC	G	C	SNP	388	388	1	120	m54363_200520_231838/10092832/ccs, m54363_200520_231838/10093326/ccs, m54363_200520_231838/10223815/ccs, m54363_200520_231838/10289871/ccs, m54363_200520_231838/10420715/ccs, m54363_200520_231838/12321786/ccs, m54363_200520_231838/14090759/ccs, m54363_200520_231838/14287842/ccs, m54363_200520_231838/14418243/ccs, m54363_200520_231838/14680507/ccs, m54363_200520_231838/15401514/ccs, m54363_200520_…	119	0.992	1.2e-236	1	1
[truncated: 961 more rows]
